# Supplementary material for: Active RNAP pre-initiation sites are highly mutated by cytidine deaminases in yeast, with AID targeting small RNA genes
Source: eLife journal article supplement (doi:10.7554/elife.03553), 2014-09-18
Supplement: supp [file elife-03553-supp-v1.zip]

Figure 3 - figure supplement 4

A

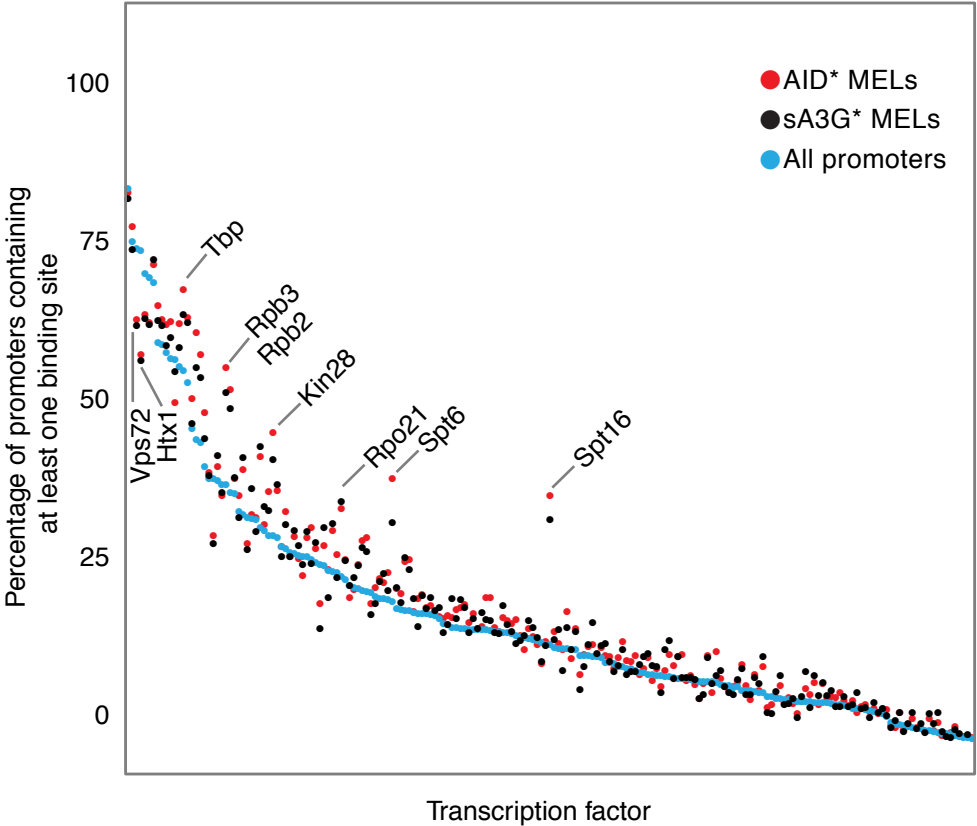

B

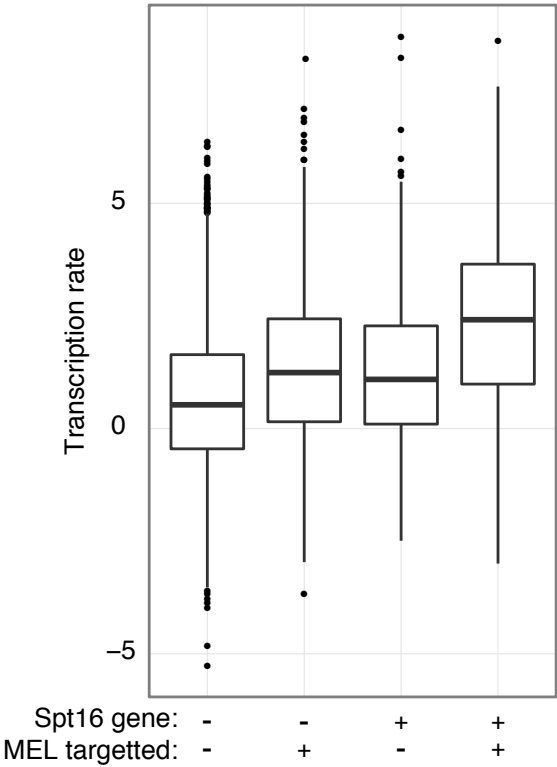

C

| Transcription factor | Percentage of AID* MELs containing a binding site | Percentage of sA3G* MELs containing a binding site | Percentage of all promoters containing a binding site |
|----------------------|---------------------------------------------------|----------------------------------------------------|-------------------------------------------------------|
| Vps72                | 59.8                                              | 59.0                                               | 69.9                                                  |
| Htz1                 | 54.9                                              | 53.9                                               | 69.6                                                  |
| Tbp                  | 64.0                                              | 60.5                                               | 52.5                                                  |
| Bur6                 | 60.2                                              | 59.4                                               | 50.9                                                  |
| Tfa2                 | 58.0                                              | 53.0                                               | 42.7                                                  |
| Rpb7                 | 54.9                                              | 51.5                                               | 42.2                                                  |
| Rpb3                 | 53.0                                              | 49.4                                               | 36.3                                                  |
| Rpb2                 | 49.8                                              | 47.2                                               | 35.2                                                  |
| Tfb3                 | 40.3                                              | 41.8                                               | 30.1                                                  |
| Kin28                | 43.7                                              | 39.9                                               | 29.0                                                  |
| Rpo21                | 32.8                                              | 33.9                                               | 23.2                                                  |
| Spt6                 | 37.1                                              | 30.9                                               | 19.6                                                  |
| Spt16                | 34.8                                              | 31.3                                               | 13.4                                                  |
