# Supplementary material for: Active RNAP pre-initiation sites are highly mutated by cytidine deaminases in yeast, with AID targeting small RNA genes
Source: eLife journal article supplement (doi:10.7554/elife.03553), 2014-09-18
Supplement: supp [file elife-03553-supp-v1.zip]

Archive with 16 entries (16 files):
- elife_poa_e03553_Figure_3_Figure_Supplement_4.pdf
- elife_poa_e03553_Figure_5_Figure_Supplement_1.pdf
- elife_poa_e03553_Figure_4_Figure_Supplement_1.docx
- elife_poa_e03553_Figure_2_Figure_Supplement_1.docx
- elife_poa_e03553_Supplementary_File_3.pdf
- elife_poa_e03553_Supplementary_File_4.zip
- elife_poa_e03553_Figure_2_Figure_Supplement_2.pdf
- elife_poa_e03553_Figure_3_Figure_Supplement_1.pdf
- elife_poa_e03553_Figure_4_Figure_Supplement_2.pdf
- elife_poa_e03553_Figure_3_Figure_Supplement_3.pdf
- elife_poa_e03553_Supplementary_File_1.txt
- elife_poa_e03553_Supplementary_File_2.txt
- elife_poa_e03553_Figure_4_Figure_Supplement_3.pdf
- elife_poa_e03553_Figure_3_Figure_Supplement_2.pdf
- elife_poa_e03553_Figure_5_Figure_Supplement_2.pdf
- elife_poa_e03553_Figure_4_Figure_Supplement_4.docx
