# Supplementary material for: Active RNAP pre-initiation sites are highly mutated by cytidine deaminases in yeast, with AID targeting small RNA genes
Source: eLife journal article supplement (doi:10.7554/elife.03553), 2014-09-18
Supplement: supp [file elife-03553-supp-v1.zip › elife_poa_e03553_Supplementary_File_1.txt]

mutator	chromsome	position	clone	ref_base	mut_base	flanking_sequence_pyrimidine_context
AID*	chrI	32735	1	C	T	TTCTC
AID*	chrI	43756	1	C	T	AGCTC
AID*	chrI	45789	1	C	T	TACCC
AID*	chrI	71757	1	C	T	CACCA
AID*	chrI	76195	1	G	A	AGCTA
AID*	chrI	110482	1	C	T	AACGT
AID*	chrI	139204	1	C	T	AACAG
AID*	chrI	139221	1	C	T	TGCGA
AID*	chrI	142085	1	C	T	TTCTT
AID*	chrI	142097	1	C	T	TCCTT
AID*	chrI	142119	1	C	T	ACCTC
AID*	chrI	152196	1	C	T	AACAT
AID*	chrI	181200	1	C	T	AACTG
AID*	chrI	190282	1	C	T	CGCCA
AID*	chrII	9623	1	C	T	ATCTG
AID*	chrII	13719	1	G	A	TACTC
AID*	chrII	24547	1	G	A	AACAT
AID*	chrII	36422	1	C	T	AGCGC
AID*	chrII	40727	1	G	A	AACCA
AID*	chrII	42583	1	G	A	CACCA
AID*	chrII	60778	1	G	A	TACAA
AID*	chrII	68436	1	C	T	AGCTT
AID*	chrII	87991	1	C	T	TTCCT
AID*	chrII	87997	1	C	T	TTCAC
AID*	chrII	87999	1	C	T	CACAT
AID*	chrII	88003	1	C	T	TCCCA
AID*	chrII	92872	1	G	A	ACCGG
AID*	chrII	100390	1	C	T	ATCTT
AID*	chrII	104169	1	C	T	AACTT
AID*	chrII	110514	1	C	T	AACGT
AID*	chrII	113629	1	G	A	AGCTC
AID*	chrII	117443	1	G	A	AGCCT
AID*	chrII	136498	1	C	T	TTCAA
AID*	chrII	140335	1	G	A	TGCTT
AID*	chrII	164134	1	C	T	AACAG
AID*	chrII	164156	1	G	A	CACTC
AID*	chrII	164166	1	G	A	CACGA
AID*	chrII	176766	1	G	A	AGCCA
AID*	chrII	235837	1	G	A	TACAT
AID*	chrII	235904	1	C	T	GTCGA
AID*	chrII	235952	1	C	T	TTCTA
AID*	chrII	236483	1	C	T	CTCTA
AID*	chrII	240292	1	C	T	ATCTA
AID*	chrII	242621	1	C	T	AACCT
AID*	chrII	254807	1	C	T	ACCTT
AID*	chrII	256266	1	C	T	AACCT
AID*	chrII	275563	1	G	A	AACAT
AID*	chrII	275566	1	G	A	ATCAA
AID*	chrII	275569	1	G	A	AGCAT
AID*	chrII	275574	1	G	A	TGCAG
AID*	chrII	278426	1	G	A	TGCCA
AID*	chrII	278432	1	C	T	TACCA
AID*	chrII	278917	1	C	T	TTCAA
AID*	chrII	278920	1	C	T	AACAT
AID*	chrII	278926	1	C	T	TTCAG
AID*	chrII	278928	1	G	A	AACTG
AID*	chrII	278932	1	G	A	TACAA
AID*	chrII	278947	1	C	T	TTCAA
AID*	chrII	278994	1	C	T	TACTT
AID*	chrII	301801	1	C	T	TGCAA
AID*	chrII	315252	1	G	A	TTCTT
AID*	chrII	315255	1	G	A	ATCTT
AID*	chrII	315276	1	G	A	AGCGA
AID*	chrII	315283	1	C	T	AACTA
AID*	chrII	315290	1	G	A	TACTT
AID*	chrII	326878	1	C	T	TACTA
AID*	chrII	332446	1	G	A	AACCT
AID*	chrII	336501	1	C	T	TACCA
AID*	chrII	337175	1	C	T	TACGT
AID*	chrII	349562	1	G	A	AACTT
AID*	chrII	375765	1	G	A	AGCTA
AID*	chrII	375789	1	G	A	TGCCA
AID*	chrII	376360	1	C	T	TGCAA
AID*	chrII	378645	1	C	T	AACAG
AID*	chrII	395619	1	G	A	CTCTA
AID*	chrII	399777	1	C	T	AACTA
AID*	chrII	415321	1	G	A	TACAA
AID*	chrII	425849	1	G	A	CACTT
AID*	chrII	425852	1	G	A	TTCCA
AID*	chrII	425856	1	G	A	TTCTT
AID*	chrII	426109	1	C	T	AACAC
AID*	chrII	452583	1	G	A	AGCGT
AID*	chrII	477489	1	G	A	AGCAC
AID*	chrII	489454	1	C	T	TGCTC
AID*	chrII	490548	1	G	A	GGCGT
AID*	chrII	501651	1	C	T	ACCAT
AID*	chrII	518094	1	G	A	TGCAT
AID*	chrII	527115	1	C	T	TGCAA
AID*	chrII	527128	1	C	T	AACAA
AID*	chrII	533677	1	C	T	AACTA
AID*	chrII	556248	1	C	T	TCCTA
AID*	chrII	561333	1	G	A	AACTC
AID*	chrII	589221	1	C	T	ATCCT
AID*	chrII	604422	1	C	T	TGCAT
AID*	chrII	662457	1	C	T	CACAG
AID*	chrII	666472	1	G	A	TGCAA
AID*	chrII	681503	1	C	T	GCCAA
AID*	chrII	681884	1	G	A	TACTT
AID*	chrII	681920	1	G	A	TACTT
AID*	chrII	683279	1	C	T	TACTC
AID*	chrII	714515	1	G	A	TCCAA
AID*	chrII	719131	1	C	T	TCCAC
AID*	chrII	723044	1	C	T	CACTG
AID*	chrII	724703	1	C	T	TTCAG
AID*	chrII	749411	1	G	A	TACAA
AID*	chrII	802562	1	C	T	CTCGA
AID*	chrIII	35268	1	C	T	AGCCA
AID*	chrIII	39101	1	C	T	AGCTT
AID*	chrIII	62212	1	C	T	GACGA
AID*	chrIII	75962	1	C	T	TACTA
AID*	chrIII	97194	1	C	T	CACAA
AID*	chrIII	107961	1	C	T	AACCA
AID*	chrIII	122519	1	C	T	AACGT
AID*	chrIII	123620	1	C	T	AGCGA
AID*	chrIII	126705	1	C	T	TACTG
AID*	chrIII	137632	1	C	T	TACAT
AID*	chrIII	137687	1	C	T	TTCTC
AID*	chrIII	147847	1	C	T	TCCCA
AID*	chrIII	163302	1	C	T	CGCAA
AID*	chrIII	178832	1	C	T	AACGG
AID*	chrIII	207715	1	C	T	CACAA
AID*	chrIII	208080	1	C	T	AACTA
AID*	chrIII	211652	1	C	T	ATCAC
AID*	chrIII	214043	1	C	T	ATCGA
AID*	chrIII	216580	1	C	T	TTCTA
AID*	chrIII	216584	1	C	T	ATCAA
AID*	chrIII	230241	1	C	T	TACTT
AID*	chrIII	264237	1	C	T	TGCTG
AID*	chrIII	264459	1	C	T	AACGT
AID*	chrIII	274401	1	C	T	TACAC
AID*	chrIII	282934	1	C	T	AGCCT
AID*	chrIII	295544	1	C	T	ATCCG
AID*	chrIII	295897	1	C	T	TGCCA
AID*	chrIV	34084	1	G	A	AACCT
AID*	chrIV	50578	1	C	T	AGCAT
AID*	chrIV	83557	1	G	A	AACCA
AID*	chrIV	106892	1	G	A	AGCAA
AID*	chrIV	111135	1	G	A	AACAT
AID*	chrIV	121812	1	G	A	AACCA
AID*	chrIV	127607	1	C	T	CTCCA
AID*	chrIV	164092	1	G	A	GACTC
AID*	chrIV	164127	1	G	A	AACAA
AID*	chrIV	174620	1	C	T	AGCGG
AID*	chrIV	221831	1	G	A	ATCCT
AID*	chrIV	221859	1	G	A	TTCTG
AID*	chrIV	221893	1	C	T	AACAA
AID*	chrIV	229773	1	G	A	AACTA
AID*	chrIV	229822	1	C	T	CCCTT
AID*	chrIV	248252	1	C	T	TACTC
AID*	chrIV	305060	1	C	T	AGCTA
AID*	chrIV	322158	1	C	T	AACTA
AID*	chrIV	326245	1	G	A	AACGG
AID*	chrIV	330961	1	C	T	AGCGA
AID*	chrIV	340275	1	G	A	TACCA
AID*	chrIV	341287	1	G	A	TACAA
AID*	chrIV	356956	1	G	A	CTCCA
AID*	chrIV	356968	1	C	T	AACAA
AID*	chrIV	359624	1	C	T	TGCTT
AID*	chrIV	359630	1	C	T	AGCAA
AID*	chrIV	363871	1	C	T	CGCTA
AID*	chrIV	364425	1	C	T	AACCA
AID*	chrIV	369508	1	C	T	AGCCT
AID*	chrIV	371193	1	C	T	AGCAT
AID*	chrIV	374919	1	G	A	AGCAG
AID*	chrIV	387476	1	G	A	AACTG
AID*	chrIV	423712	1	G	A	TACAC
AID*	chrIV	434216	1	G	A	AGCAT
AID*	chrIV	434265	1	G	A	AGCAT
AID*	chrIV	434305	1	G	A	CACTA
AID*	chrIV	454045	1	C	T	AGCAG
AID*	chrIV	458268	1	G	A	AGCTA
AID*	chrIV	465110	1	C	T	TGCAA
AID*	chrIV	494454	1	G	A	TGCGA
AID*	chrIV	504813	1	G	A	AACGA
AID*	chrIV	507204	1	G	A	CACGA
AID*	chrIV	512448	1	G	A	AGCGT
AID*	chrIV	550680	1	G	A	ATCGG
AID*	chrIV	552144	1	G	A	AGCAT
AID*	chrIV	556608	1	G	A	AACTT
AID*	chrIV	561219	1	C	T	TACGG
AID*	chrIV	568920	1	C	T	ATCAG
AID*	chrIV	574041	1	C	T	AACTC
AID*	chrIV	579375	1	C	T	GTCGT
AID*	chrIV	589529	1	G	A	GACAA
AID*	chrIV	600566	1	C	T	TACGG
AID*	chrIV	628596	1	C	T	AACAG
AID*	chrIV	630972	1	G	A	AACAA
AID*	chrIV	632635	1	G	A	AACAA
AID*	chrIV	662286	1	C	T	ATCCT
AID*	chrIV	668029	1	G	A	AGCGG
AID*	chrIV	715438	1	G	A	TACAC
AID*	chrIV	721575	1	G	A	TGCTA
AID*	chrIV	721576	1	C	T	AGCAG
AID*	chrIV	727933	1	C	T	AACGA
AID*	chrIV	741807	1	G	A	AACCT
AID*	chrIV	761158	1	C	T	TACTA
AID*	chrIV	765235	1	C	T	ATCAA
AID*	chrIV	769089	1	C	T	AACAA
AID*	chrIV	802742	1	G	A	TCCGG
AID*	chrIV	803903	1	G	A	AACCC
AID*	chrIV	811712	1	G	A	TACCA
AID*	chrIV	817624	1	G	A	AACAC
AID*	chrIV	819229	1	G	A	AACAG
AID*	chrIV	837211	1	C	T	CGCTA
AID*	chrIV	856244	1	C	T	AACAA
AID*	chrIV	907078	1	G	A	AACCA
AID*	chrIV	907122	1	G	A	GTCTT
AID*	chrIV	915428	1	C	T	ATCTG
AID*	chrIV	916400	1	C	T	TACCT
AID*	chrIV	930891	1	C	T	TACCA
AID*	chrIV	945209	1	C	T	AACTT
AID*	chrIV	974601	1	G	A	CTCTA
AID*	chrIV	997168	1	G	A	CACCT
AID*	chrIV	998653	1	C	T	AACAG
AID*	chrIV	998656	1	C	T	AGCTA
AID*	chrIV	998659	1	C	T	TACAT
AID*	chrIV	1010332	1	C	T	TTCCA
AID*	chrIV	1013241	1	G	A	TACTT
AID*	chrIV	1017241	1	G	A	CACCG
AID*	chrIV	1032137	1	G	A	AGCAA
AID*	chrIV	1035667	1	C	T	AACTC
AID*	chrIV	1035688	1	C	T	AACTT
AID*	chrIV	1072032	1	C	T	AACGT
AID*	chrIV	1075485	1	G	A	ATCCT
AID*	chrIV	1092668	1	C	T	ATCTA
AID*	chrIV	1092701	1	G	A	TGCAC
AID*	chrIV	1135670	1	G	A	AACGC
AID*	chrIV	1142484	1	G	A	GACTT
AID*	chrIV	1168963	1	C	T	AACCG
AID*	chrIV	1174201	1	C	T	AGCAA
AID*	chrIV	1178408	1	G	A	AACAC
AID*	chrIV	1224154	1	G	A	CACAC
AID*	chrIV	1225489	1	C	T	ATCCA
AID*	chrIV	1239125	1	G	A	TTCCC
AID*	chrIV	1243077	1	G	A	AACTT
AID*	chrIV	1250138	1	G	A	AGCCT
AID*	chrIV	1257058	1	C	T	TTCTA
AID*	chrIV	1257062	1	C	T	AACCA
AID*	chrIV	1275317	1	G	A	CGCCT
AID*	chrIV	1276377	1	C	T	AGCTT
AID*	chrIV	1292214	1	G	A	AACGG
AID*	chrIV	1301575	1	C	T	AGCAA
AID*	chrIV	1339205	1	C	T	AACTT
AID*	chrIV	1352479	1	G	A	AGCCC
AID*	chrIV	1353275	1	G	A	AGCCA
AID*	chrIV	1366066	1	G	A	TACTG
AID*	chrIV	1374163	1	C	T	CGCAT
AID*	chrIV	1417292	1	C	T	AGCCA
AID*	chrIV	1441456	1	G	A	AGCTT
AID*	chrIV	1443484	1	G	A	TACCT
AID*	chrIV	1445589	1	C	T	AGCCC
AID*	chrIV	1447787	1	C	T	AACGT
AID*	chrIV	1455084	1	G	A	AACTT
AID*	chrIV	1459504	1	C	T	AACAC
AID*	chrIV	1461725	1	G	A	CTCTT
AID*	chrIV	1465946	1	C	T	ATCAA
AID*	chrIV	1469282	1	C	T	TTCTA
AID*	chrIV	1469392	1	C	T	TACAC
AID*	chrIV	1489866	1	C	T	AACAA
AID*	chrIV	1489875	1	C	T	AACTA
AID*	chrIV	1489883	1	G	A	TACTT
AID*	chrIV	1493154	1	G	A	AACTA
AID*	chrIV	1496612	1	C	T	ACCTT
AID*	chrIV	1500938	1	C	T	AACCG
AID*	chrIV	1507762	1	C	T	TTCGT
AID*	chrIV	1507767	1	C	T	AACAA
AID*	chrIV	1518899	1	C	T	TGCAA
AID*	chrIX	54006	1	G	A	TGCCA
AID*	chrIX	55912	1	G	A	CACCA
AID*	chrIX	68640	1	G	A	AACTA
AID*	chrIX	95595	1	G	A	CACCT
AID*	chrIX	96491	1	G	A	AACAG
AID*	chrIX	97174	1	G	A	AACAG
AID*	chrIX	123638	1	G	A	TACGG
AID*	chrIX	148918	1	G	A	AACTG
AID*	chrIX	150582	1	G	A	CGCGT
AID*	chrIX	187907	1	C	T	TACTT
AID*	chrIX	188879	1	C	T	TGCAG
AID*	chrIX	215763	1	G	A	AGCTG
AID*	chrIX	249690	1	G	A	TACCG
AID*	chrIX	256158	1	C	T	TACTA
AID*	chrIX	257149	1	G	A	TACAT
AID*	chrIX	258812	1	G	A	AACCG
AID*	chrIX	277564	1	C	T	TACAA
AID*	chrIX	298980	1	G	A	TACCA
AID*	chrIX	301633	1	G	A	CGCTA
AID*	chrM	18486	1	G	A	TACTT
AID*	chrV	1582	1	G	A	CACCA
AID*	chrV	7587	1	G	A	ATCTA
AID*	chrV	9788	1	G	A	TACTC
AID*	chrV	13572	1	C	T	ATCAA
AID*	chrV	16297	1	C	T	TGCTC
AID*	chrV	28005	1	G	A	AACCG
AID*	chrV	32253	1	G	A	ATCAA
AID*	chrV	33055	1	G	A	CGCAG
AID*	chrV	53243	1	G	A	GACAA
AID*	chrV	58300	1	G	A	AACCT
AID*	chrV	61069	1	G	A	TACGG
AID*	chrV	68934	1	G	A	TTCTC
AID*	chrV	70009	1	G	A	TGCAG
AID*	chrV	70431	1	G	A	TACAC
AID*	chrV	90008	1	G	A	TTCAA
AID*	chrV	90012	1	G	A	CACAT
AID*	chrV	90014	1	G	A	AACAC
AID*	chrV	90017	1	G	A	TACAA
AID*	chrV	90032	1	G	A	TGCCC
AID*	chrV	100129	1	G	A	AGCCA
AID*	chrV	100192	1	C	T	AACCG
AID*	chrV	100201	1	G	A	AGCGC
AID*	chrV	101822	1	G	A	GACTT
AID*	chrV	118029	1	G	A	AACAG
AID*	chrV	118061	1	G	A	AACGA
AID*	chrV	122975	1	G	A	ATCGT
AID*	chrV	123077	1	G	A	AACTC
AID*	chrV	123589	1	C	T	ATCTA
AID*	chrV	141574	1	G	A	AACGA
AID*	chrV	160441	1	G	A	ATCTC
AID*	chrV	208564	1	G	A	TACAC
AID*	chrV	225277	1	G	A	TTCTT
AID*	chrV	241772	1	G	A	TGCAG
AID*	chrV	250337	1	G	A	AACCG
AID*	chrV	251454	1	G	A	AGCAA
AID*	chrV	265947	1	G	A	AACTT
AID*	chrV	268900	1	G	A	TCCAA
AID*	chrV	271200	1	G	A	AACAA
AID*	chrV	283587	1	G	A	GGCGG
AID*	chrV	291752	1	G	A	TGCCG
AID*	chrV	298859	1	C	T	TACCA
AID*	chrV	303353	1	G	A	TACAA
AID*	chrV	303364	1	G	A	AACGT
AID*	chrV	306257	1	G	A	AGCTC
AID*	chrV	312060	1	G	A	TGCAA
AID*	chrV	321360	1	G	A	TCCTC
AID*	chrV	332902	1	G	A	AGCCT
AID*	chrV	335320	1	C	T	TACCA
AID*	chrV	342238	1	G	A	AGCAA
AID*	chrV	342282	1	G	A	TACGT
AID*	chrV	348169	1	G	A	AGCTT
AID*	chrV	350617	1	G	A	TACCT
AID*	chrV	354951	1	G	A	AGCCG
AID*	chrV	416716	1	G	A	AACAG
AID*	chrV	422159	1	G	A	AACGG
AID*	chrV	423462	1	G	A	GCCTA
AID*	chrV	424612	1	C	T	TTCTT
AID*	chrV	424630	1	G	A	AACCT
AID*	chrV	431221	1	G	A	ATCTA
AID*	chrV	431231	1	C	T	ATCTT
AID*	chrV	431321	1	G	A	TACAA
AID*	chrV	435578	1	G	A	TACAT
AID*	chrV	442068	1	G	A	ATCCG
AID*	chrV	442165	1	G	A	AGCTC
AID*	chrV	466609	1	G	A	TACAA
AID*	chrV	468994	1	G	A	GCCAA
AID*	chrV	472545	1	G	A	AGCAG
AID*	chrV	472549	1	G	A	AACAA
AID*	chrV	474352	1	G	A	TGCAG
AID*	chrV	487365	1	G	A	CACCG
AID*	chrV	490883	1	G	A	TGCTT
AID*	chrV	492044	1	G	A	ACCAA
AID*	chrV	492045	1	G	A	AACCA
AID*	chrV	545110	1	G	A	CTCTG
AID*	chrV	545534	1	G	A	AACTA
AID*	chrV	552466	1	G	A	AACTC
AID*	chrV	570038	1	G	A	TGCTT
AID*	chrVI	5411	1	C	T	TTCAC
AID*	chrVI	28183	1	C	T	TGCTT
AID*	chrVI	54818	1	G	A	AACCA
AID*	chrVI	54936	1	C	T	AACAA
AID*	chrVI	56066	1	C	T	ATCGC
AID*	chrVI	75050	1	C	T	TACAG
AID*	chrVI	78420	1	C	T	AACGT
AID*	chrVI	83954	1	G	A	TGCAT
AID*	chrVI	87364	1	C	T	TACTT
AID*	chrVI	88335	1	C	T	TACAA
AID*	chrVI	89295	1	C	T	AACAA
AID*	chrVI	96018	1	C	T	CGCAT
AID*	chrVI	101461	1	C	T	TTCAA
AID*	chrVI	103620	1	C	T	TGCAA
AID*	chrVI	137506	1	C	T	AACTC
AID*	chrVI	153636	1	G	A	AGCCT
AID*	chrVI	184475	1	C	T	ATCCT
AID*	chrVI	191763	1	C	T	TACTA
AID*	chrVI	196385	1	C	T	TGCGT
AID*	chrVI	210658	1	G	A	TACGA
AID*	chrVI	224905	1	C	T	ATCTC
AID*	chrVI	224913	1	C	T	AACCC
AID*	chrVI	234114	1	C	T	AACAC
AID*	chrVI	238279	1	G	A	ATCAA
AID*	chrVI	261527	1	C	T	CACAA
AID*	chrVII	23829	1	C	T	AACTT
AID*	chrVII	43310	1	G	A	AACCA
AID*	chrVII	74285	1	G	A	AACTA
AID*	chrVII	80410	1	G	A	AACAA
AID*	chrVII	115904	1	C	T	TTCTT
AID*	chrVII	123369	1	C	T	AGCTT
AID*	chrVII	137506	1	G	A	AACAA
AID*	chrVII	144116	1	G	A	CGCTG
AID*	chrVII	144761	1	C	T	ATCAT
AID*	chrVII	147763	1	G	A	TCCAT
AID*	chrVII	147845	1	C	T	TGCCA
AID*	chrVII	159400	1	G	A	TACAT
AID*	chrVII	174369	1	G	A	TACCT
AID*	chrVII	196721	1	G	A	TGCTA
AID*	chrVII	205580	1	C	T	AACTG
AID*	chrVII	205609	1	C	T	TGCAA
AID*	chrVII	205734	1	G	A	TACAT
AID*	chrVII	207365	1	G	A	TACTG
AID*	chrVII	213892	1	G	A	TTCTT
AID*	chrVII	243912	1	G	A	TGCAT
AID*	chrVII	244218	1	G	A	AACTG
AID*	chrVII	254533	1	C	T	AGCAT
AID*	chrVII	254539	1	G	A	AACGT
AID*	chrVII	254560	1	G	A	AACTT
AID*	chrVII	255288	1	G	A	TACAA
AID*	chrVII	257467	1	G	A	AGCAA
AID*	chrVII	277471	1	C	T	TTCCA
AID*	chrVII	280568	1	C	T	AACCA
AID*	chrVII	284923	1	G	A	CACTA
AID*	chrVII	287373	1	G	A	TGCAG
AID*	chrVII	305474	1	C	T	AACGC
AID*	chrVII	306350	1	G	A	AGCAA
AID*	chrVII	310912	1	C	T	TCCTT
AID*	chrVII	319892	1	C	T	AACCC
AID*	chrVII	363856	1	C	T	AGCGT
AID*	chrVII	366691	1	G	A	TTCTT
AID*	chrVII	371502	1	G	A	AACGG
AID*	chrVII	388910	1	C	T	TACTA
AID*	chrVII	398525	1	C	T	TACTT
AID*	chrVII	401560	1	G	A	ACCGT
AID*	chrVII	401568	1	C	T	AGCGT
AID*	chrVII	409990	1	C	T	TGCCT
AID*	chrVII	412295	1	G	A	ATCAA
AID*	chrVII	413168	1	G	A	AGCAA
AID*	chrVII	413173	1	G	A	TGCTT
AID*	chrVII	431104	1	C	T	ACCTA
AID*	chrVII	438482	1	C	T	ATCCG
AID*	chrVII	438970	1	C	T	AACTT
AID*	chrVII	440726	1	G	A	CACAG
AID*	chrVII	443121	1	C	T	CACGA
AID*	chrVII	472476	1	G	A	CGCCT
AID*	chrVII	478759	1	C	T	AACAG
AID*	chrVII	484288	1	C	T	TCCCT
AID*	chrVII	485410	1	G	A	AGCGT
AID*	chrVII	487870	1	C	T	TCCAA
AID*	chrVII	534164	1	C	T	AGCTT
AID*	chrVII	541847	1	C	T	TACCA
AID*	chrVII	546429	1	G	A	ACCAA
AID*	chrVII	585109	1	G	A	TACCT
AID*	chrVII	589058	1	C	T	AGCTT
AID*	chrVII	591492	1	C	T	AGCTA
AID*	chrVII	606051	1	C	T	TACAA
AID*	chrVII	610329	1	C	T	TCCGT
AID*	chrVII	648955	1	G	A	AGCAT
AID*	chrVII	648956	1	C	T	TGCTA
AID*	chrVII	656768	1	G	A	TACTC
AID*	chrVII	661777	1	C	T	TGCAC
AID*	chrVII	662074	1	G	A	TTCTT
AID*	chrVII	662531	1	C	T	AGCGA
AID*	chrVII	694014	1	G	A	TCCCA
AID*	chrVII	701907	1	C	T	TCCAT
AID*	chrVII	709315	1	C	T	TACGT
AID*	chrVII	709465	1	C	T	AACTG
AID*	chrVII	749366	1	G	A	TGCTA
AID*	chrVII	788259	1	G	A	AACCT
AID*	chrVII	794484	1	C	T	TGCGT
AID*	chrVII	798513	1	C	T	GACAT
AID*	chrVII	801884	1	C	T	TACCT
AID*	chrVII	801903	1	G	A	TGCCG
AID*	chrVII	806125	1	G	A	AGCTT
AID*	chrVII	845702	1	C	T	TTCGA
AID*	chrVII	850520	1	G	A	AGCAA
AID*	chrVII	883862	1	C	T	AACTA
AID*	chrVII	883912	1	G	A	ATCTA
AID*	chrVII	885990	1	C	T	AACGG
AID*	chrVII	913322	1	C	T	TTCTC
AID*	chrVII	939918	1	C	T	AGCAG
AID*	chrVII	974000	1	G	A	TACTG
AID*	chrVII	974083	1	C	T	AGCGG
AID*	chrVII	976825	1	C	T	AACTT
AID*	chrVII	977221	1	C	T	TTCTT
AID*	chrVII	977310	1	C	T	CACAT
AID*	chrVII	1001703	1	C	T	TACGA
AID*	chrVII	1017975	1	G	A	TGCAA
AID*	chrVII	1027280	1	C	T	AACCC
AID*	chrVII	1043135	1	G	A	AACAC
AID*	chrVII	1050111	1	C	T	AACAG
AID*	chrVII	1052309	1	G	A	CGCTT
AID*	chrVII	1055695	1	G	A	TGCGC
AID*	chrVII	1063962	1	G	A	AGCAA
AID*	chrVII	1076159	1	G	A	TGCAA
AID*	chrVII	1083493	1	G	A	TACTA
AID*	chrVIII	6185	1	C	T	AACCG
AID*	chrVIII	10747	1	C	T	AACCC
AID*	chrVIII	37262	1	G	A	TACGG
AID*	chrVIII	50979	1	C	T	AACCT
AID*	chrVIII	62801	1	C	T	AACCC
AID*	chrVIII	67531	1	G	A	AACGT
AID*	chrVIII	71155	1	C	T	AACTG
AID*	chrVIII	81790	1	C	T	TACCG
AID*	chrVIII	98389	1	C	T	CGCTA
AID*	chrVIII	116824	1	C	T	TACAA
AID*	chrVIII	123668	1	G	A	AGCTA
AID*	chrVIII	126705	1	G	A	AACAT
AID*	chrVIII	137133	1	C	T	CTCAT
AID*	chrVIII	143627	1	G	A	TGCGT
AID*	chrVIII	148729	1	C	T	AGCAA
AID*	chrVIII	148734	1	G	A	AGCAT
AID*	chrVIII	181241	1	G	A	AACTG
AID*	chrVIII	206400	1	C	T	ATCTT
AID*	chrVIII	219938	1	C	T	TTCTC
AID*	chrVIII	231887	1	C	T	TGCTG
AID*	chrVIII	242020	1	G	A	AACGG
AID*	chrVIII	257824	1	C	T	CGCTA
AID*	chrVIII	324971	1	C	T	TGCAA
AID*	chrVIII	328249	1	C	T	AACAA
AID*	chrVIII	328254	1	C	T	AACAA
AID*	chrVIII	330379	1	C	T	AACCA
AID*	chrVIII	332230	1	C	T	TACTA
AID*	chrVIII	344062	1	C	T	CACAA
AID*	chrVIII	364255	1	G	A	AGCAG
AID*	chrVIII	374450	1	C	T	AGCAG
AID*	chrVIII	388949	1	G	A	TGCCT
AID*	chrVIII	407503	1	C	T	CCCTT
AID*	chrVIII	462346	1	C	T	TGCCT
AID*	chrVIII	462398	1	G	A	AACTA
AID*	chrVIII	469311	1	G	A	TGCAT
AID*	chrVIII	480957	1	C	T	AACCC
AID*	chrVIII	480959	1	C	T	CCCAA
AID*	chrVIII	484674	1	C	T	ATCGG
AID*	chrVIII	517475	1	G	A	AACGA
AID*	chrVIII	554152	1	G	A	TTCAG
AID*	chrX	50459	1	G	A	CACAA
AID*	chrX	52163	1	G	A	TACTG
AID*	chrX	90756	1	C	T	ATCAA
AID*	chrX	97432	1	C	T	TGCAG
AID*	chrX	104946	1	C	T	AACTT
AID*	chrX	106342	1	C	T	AACAT
AID*	chrX	106351	1	C	T	TACTT
AID*	chrX	136045	1	C	T	CTCCA
AID*	chrX	136839	1	G	A	TGCAG
AID*	chrX	140130	1	G	A	TTCGG
AID*	chrX	140139	1	G	A	ATCTC
AID*	chrX	150618	1	G	A	AGCAA
AID*	chrX	157343	1	C	T	TTCGT
AID*	chrX	160490	1	C	T	TTCCT
AID*	chrX	173066	1	G	A	CTCAA
AID*	chrX	173091	1	G	A	ATCCT
AID*	chrX	173105	1	G	A	TACTC
AID*	chrX	181839	1	C	T	AACTC
AID*	chrX	194828	1	C	T	TGCGA
AID*	chrX	205279	1	C	T	TCCAA
AID*	chrX	228532	1	C	T	AACAA
AID*	chrX	233977	1	C	T	AACCA
AID*	chrX	234262	1	C	T	ATCAC
AID*	chrX	265182	1	G	A	AGCTA
AID*	chrX	285138	1	C	T	TACCG
AID*	chrX	331675	1	G	A	TACAG
AID*	chrX	337917	1	G	A	ACCCG
AID*	chrX	337929	1	C	T	TTCGG
AID*	chrX	354299	1	C	T	ATCTT
AID*	chrX	360473	1	G	A	GACGT
AID*	chrX	386787	1	C	T	TACTC
AID*	chrX	396763	1	G	A	TGCCA
AID*	chrX	415011	1	G	A	AACCT
AID*	chrX	418335	1	C	T	AACTA
AID*	chrX	419846	1	C	T	TACAG
AID*	chrX	424475	1	G	A	ATCTG
AID*	chrX	434102	1	C	T	CTCAA
AID*	chrX	436150	1	G	A	TACGT
AID*	chrX	445705	1	C	T	ATCAT
AID*	chrX	449144	1	C	T	TCCCA
AID*	chrX	464297	1	C	T	TACTG
AID*	chrX	521539	1	G	A	CACGT
AID*	chrX	521761	1	C	T	AACAA
AID*	chrX	526207	1	G	A	TACAG
AID*	chrX	540517	1	C	T	AACTT
AID*	chrX	545223	1	C	T	AACAG
AID*	chrX	559211	1	G	A	ATCAA
AID*	chrX	559353	1	C	T	AGCTT
AID*	chrX	570665	1	G	A	AGCTC
AID*	chrX	608963	1	G	A	TTCGT
AID*	chrX	617409	1	C	T	TCCTT
AID*	chrX	620598	1	G	A	AACAA
AID*	chrX	641607	1	G	A	ATCTT
AID*	chrX	646536	1	C	T	ATCTA
AID*	chrX	647365	1	C	T	TACAG
AID*	chrX	647370	1	C	T	AACAA
AID*	chrX	663729	1	G	A	AACTT
AID*	chrX	703535	1	G	A	TTCAG
AID*	chrX	708862	1	G	A	AACGG
AID*	chrX	724164	1	G	A	AACAG
AID*	chrXI	9920	1	G	A	AGCTT
AID*	chrXI	22138	1	G	A	TTCCA
AID*	chrXI	30895	1	C	T	TACTG
AID*	chrXI	38624	1	C	T	CGCAT
AID*	chrXI	38923	1	G	A	AACAA
AID*	chrXI	45882	1	G	A	AACAG
AID*	chrXI	48567	1	G	A	AACTG
AID*	chrXI	69540	1	C	T	AGCTT
AID*	chrXI	88707	1	G	A	AGCCA
AID*	chrXI	99677	1	G	A	CGCAT
AID*	chrXI	100080	1	C	T	AACGC
AID*	chrXI	100081	1	G	A	AGCGT
AID*	chrXI	100082	1	C	T	CGCTT
AID*	chrXI	100322	1	C	T	AACTA
AID*	chrXI	109196	1	C	T	AACAA
AID*	chrXI	118734	1	G	A	AACTC
AID*	chrXI	153040	1	G	A	AACTG
AID*	chrXI	155418	1	G	A	AACTC
AID*	chrXI	162520	1	G	A	ATCAG
AID*	chrXI	164462	1	C	T	AACAG
AID*	chrXI	166440	1	G	A	CACAA
AID*	chrXI	169884	1	C	T	ATCAA
AID*	chrXI	171265	1	G	A	AACTA
AID*	chrXI	174711	1	G	A	ATCTG
AID*	chrXI	176563	1	G	A	AGCGT
AID*	chrXI	203024	1	G	A	TACGC
AID*	chrXI	210395	1	G	A	CACAG
AID*	chrXI	217231	1	C	T	TACTT
AID*	chrXI	230584	1	G	A	AACTT
AID*	chrXI	231876	1	G	A	AGCAA
AID*	chrXI	231894	1	G	A	AACAA
AID*	chrXI	259165	1	C	T	TGCCA
AID*	chrXI	259177	1	C	T	TCCTA
AID*	chrXI	282413	1	G	A	ACCAA
AID*	chrXI	282832	1	C	T	AACTG
AID*	chrXI	308179	1	G	A	CACGC
AID*	chrXI	313443	1	G	A	ATCGT
AID*	chrXI	321724	1	G	A	AGCGA
AID*	chrXI	327216	1	G	A	TGCCC
AID*	chrXI	327546	1	G	A	TTCTT
AID*	chrXI	328155	1	G	A	CACAA
AID*	chrXI	328157	1	G	A	ATCAC
AID*	chrXI	330089	1	C	T	ACCGA
AID*	chrXI	335002	1	G	A	TACTA
AID*	chrXI	359699	1	G	A	TACGT
AID*	chrXI	379785	1	G	A	AACTG
AID*	chrXI	385529	1	C	T	ACCAT
AID*	chrXI	408061	1	G	A	AACAA
AID*	chrXI	431840	1	G	A	ATCGG
AID*	chrXI	435353	1	G	A	TACTC
AID*	chrXI	446769	1	G	A	AACTA
AID*	chrXI	466234	1	G	A	AACAT
AID*	chrXI	490322	1	C	T	TACCT
AID*	chrXI	514729	1	G	A	AACAA
AID*	chrXI	518039	1	G	A	ACCGG
AID*	chrXI	554879	1	G	A	TTCAT
AID*	chrXI	559367	1	G	A	AGCAT
AID*	chrXI	618795	1	G	A	ATCAC
AID*	chrXII	17077	1	C	T	AACTC
AID*	chrXII	23463	1	C	T	TTCAT
AID*	chrXII	25309	1	G	A	TACTC
AID*	chrXII	48593	1	C	T	ACCGA
AID*	chrXII	48699	1	C	T	AACGT
AID*	chrXII	49819	1	C	T	AACAG
AID*	chrXII	54212	1	C	T	ATCAT
AID*	chrXII	54222	1	C	T	AGCTT
AID*	chrXII	67885	1	C	T	TGCGC
AID*	chrXII	86168	1	G	A	TACAA
AID*	chrXII	99762	1	C	T	CACTG
AID*	chrXII	108228	1	C	T	AACTT
AID*	chrXII	120141	1	G	A	TACCC
AID*	chrXII	123164	1	C	T	AACAA
AID*	chrXII	123792	1	C	T	AGCCG
AID*	chrXII	123797	1	C	T	TTCAT
AID*	chrXII	169435	1	C	T	TACCA
AID*	chrXII	173517	1	G	A	TACCA
AID*	chrXII	179688	1	G	A	AACAA
AID*	chrXII	188873	1	C	T	CACAA
AID*	chrXII	198722	1	C	T	AACTT
AID*	chrXII	198763	1	C	T	TGCTT
AID*	chrXII	212412	1	G	A	AGCCA
AID*	chrXII	232246	1	C	T	AACCA
AID*	chrXII	237850	1	C	T	AACAA
AID*	chrXII	242163	1	G	A	AACTC
AID*	chrXII	253783	1	G	A	TTCAA
AID*	chrXII	282844	1	C	T	AACCA
AID*	chrXII	282853	1	C	T	TACAT
AID*	chrXII	290108	1	G	A	AACAC
AID*	chrXII	290111	1	G	A	CACAA
AID*	chrXII	290119	1	C	T	TGCTC
AID*	chrXII	322640	1	C	T	CGCTG
AID*	chrXII	343880	1	G	A	TGCGC
AID*	chrXII	346476	1	G	A	AGCTC
AID*	chrXII	347372	1	C	T	ATCTG
AID*	chrXII	366277	1	C	T	AACAA
AID*	chrXII	366282	1	C	T	TACAG
AID*	chrXII	366289	1	G	A	ATCAT
AID*	chrXII	366292	1	C	T	ATCAG
AID*	chrXII	368633	1	G	A	GTCCT
AID*	chrXII	368715	1	G	A	AACGG
AID*	chrXII	370172	1	G	A	TTCTT
AID*	chrXII	370188	1	G	A	TACAT
AID*	chrXII	370192	1	G	A	ATCCT
AID*	chrXII	370195	1	G	A	TCCAT
AID*	chrXII	395818	1	C	T	AGCCT
AID*	chrXII	425485	1	C	T	CCCAT
AID*	chrXII	440307	1	C	T	CGCTT
AID*	chrXII	440319	1	G	A	TACAA
AID*	chrXII	441649	1	C	T	TTCTT
AID*	chrXII	444460	1	G	A	TACTT
AID*	chrXII	447616	1	G	A	CACAA
AID*	chrXII	491835	1	G	A	CACAT
AID*	chrXII	492718	1	G	A	ACCAT
AID*	chrXII	498859	1	C	T	TACTT
AID*	chrXII	510996	1	C	T	ATCAG
AID*	chrXII	515165	1	G	A	AACAG
AID*	chrXII	554381	1	C	T	TTCAA
AID*	chrXII	559422	1	C	T	AACCC
AID*	chrXII	568401	1	C	T	TGCCT
AID*	chrXII	603067	1	G	A	GACGG
AID*	chrXII	636703	1	C	T	TACGC
AID*	chrXII	646528	1	C	T	AGCTC
AID*	chrXII	657981	1	C	T	TGCTA
AID*	chrXII	660768	1	C	T	TGCTA
AID*	chrXII	663307	1	G	A	TGCCA
AID*	chrXII	699590	1	G	A	TACAG
AID*	chrXII	710400	1	G	A	CACTT
AID*	chrXII	713452	1	G	A	TACGT
AID*	chrXII	722416	1	C	T	GACTG
AID*	chrXII	732156	1	C	T	ATCTT
AID*	chrXII	737652	1	C	T	TACTC
AID*	chrXII	739971	1	G	A	ATCTG
AID*	chrXII	757163	1	G	A	CACCA
AID*	chrXII	766325	1	C	T	ATCGA
AID*	chrXII	778023	1	C	T	ATCTT
AID*	chrXII	778042	1	C	T	TACAT
AID*	chrXII	797215	1	C	T	CACCG
AID*	chrXII	797216	1	C	T	ACCGT
AID*	chrXII	805804	1	C	T	TTCAA
AID*	chrXII	808872	1	C	T	TCCAT
AID*	chrXII	819251	1	C	T	AACAG
AID*	chrXII	819258	1	C	T	GACAA
AID*	chrXII	820837	1	G	A	AACCA
AID*	chrXII	826910	1	C	T	TACAA
AID*	chrXII	826914	1	C	T	AGCTT
AID*	chrXII	826928	1	C	T	TGCTT
AID*	chrXII	839333	1	G	A	AGCAA
AID*	chrXII	839376	1	G	A	TACAC
AID*	chrXII	844350	1	G	A	AACGT
AID*	chrXII	868247	1	G	A	AACAA
AID*	chrXII	878135	1	C	T	AACAA
AID*	chrXII	892904	1	C	T	AGCCA
AID*	chrXII	906878	1	C	T	AACTA
AID*	chrXII	922181	1	G	A	ACCTG
AID*	chrXII	948315	1	C	T	TGCTA
AID*	chrXII	965724	1	C	T	ATCAA
AID*	chrXII	973091	1	G	A	TGCTA
AID*	chrXII	988445	1	G	A	TGCAT
AID*	chrXII	1000380	1	C	T	AGCGT
AID*	chrXII	1002286	1	C	T	AACAA
AID*	chrXII	1002676	1	C	T	AACGA
AID*	chrXII	1018980	1	C	T	TCCTT
AID*	chrXII	1051948	1	G	A	AACAT
AID*	chrXII	1052091	1	C	T	AACCG
AID*	chrXII	1064191	1	G	A	TTCGT
AID*	chrXIII	34634	1	C	T	TACTA
AID*	chrXIII	49077	1	C	T	TGCAC
AID*	chrXIII	63707	1	C	T	TTCAT
AID*	chrXIII	91009	1	C	T	TCCTG
AID*	chrXIII	95455	1	C	T	TACTG
AID*	chrXIII	97693	1	C	T	ATCTG
AID*	chrXIII	104222	1	G	A	TTCGA
AID*	chrXIII	104244	1	G	A	AGCTG
AID*	chrXIII	124427	1	C	T	CGCAA
AID*	chrXIII	146414	1	C	T	AGCAG
AID*	chrXIII	147609	1	C	T	CGCAT
AID*	chrXIII	155942	1	G	A	TCCTA
AID*	chrXIII	164297	1	C	T	AGCCC
AID*	chrXIII	164342	1	C	T	AGCAT
AID*	chrXIII	165670	1	C	T	AACAC
AID*	chrXIII	169702	1	G	A	TTCCG
AID*	chrXIII	169729	1	G	A	TACTG
AID*	chrXIII	183952	1	C	T	ACCAC
AID*	chrXIII	202197	1	C	T	TACTA
AID*	chrXIII	210280	1	C	T	AGCAT
AID*	chrXIII	217124	1	G	A	TACCT
AID*	chrXIII	217130	1	G	A	AGCAT
AID*	chrXIII	217142	1	G	A	AGCGA
AID*	chrXIII	220067	1	C	T	AACCG
AID*	chrXIII	220069	1	G	A	AACGG
AID*	chrXIII	221295	1	G	A	CACAA
AID*	chrXIII	236304	1	G	A	AGCAC
AID*	chrXIII	244955	1	G	A	TACTG
AID*	chrXIII	258926	1	G	A	TACAC
AID*	chrXIII	272070	1	C	T	ACCGC
AID*	chrXIII	272076	1	C	T	ATCTC
AID*	chrXIII	272079	1	C	T	TCCGC
AID*	chrXIII	272094	1	C	T	AGCCT
AID*	chrXIII	293137	1	C	T	AACTA
AID*	chrXIII	297071	1	C	T	TGCTT
AID*	chrXIII	325510	1	C	T	TGCAA
AID*	chrXIII	348395	1	C	T	CACTG
AID*	chrXIII	363118	1	C	T	TTCGA
AID*	chrXIII	407735	1	C	T	AACAC
AID*	chrXIII	408865	1	C	T	CGCTG
AID*	chrXIII	409960	1	G	A	ATCGT
AID*	chrXIII	409970	1	G	A	ATCCG
AID*	chrXIII	431244	1	G	A	TACCA
AID*	chrXIII	431477	1	G	A	AACTT
AID*	chrXIII	434615	1	C	T	AGCTC
AID*	chrXIII	434674	1	G	A	TTCTA
AID*	chrXIII	445518	1	C	T	TTCTA
AID*	chrXIII	445521	1	C	T	TACCG
AID*	chrXIII	451374	1	G	A	ATCTA
AID*	chrXIII	463575	1	G	A	TTCTG
AID*	chrXIII	463601	1	C	T	ATCGG
AID*	chrXIII	475516	1	G	A	TGCTC
AID*	chrXIII	478940	1	C	T	TGCTC
AID*	chrXIII	478951	1	C	T	AACGG
AID*	chrXIII	494598	1	C	T	AACCG
AID*	chrXIII	504929	1	C	T	TTCAA
AID*	chrXIII	517428	1	C	T	AACAG
AID*	chrXIII	529919	1	G	A	TTCCA
AID*	chrXIII	534905	1	G	A	ACCAT
AID*	chrXIII	534906	1	G	A	TACCA
AID*	chrXIII	551879	1	C	T	AGCCT
AID*	chrXIII	559083	1	C	T	ATCGG
AID*	chrXIII	601282	1	G	A	TCCGT
AID*	chrXIII	605754	1	C	T	AGCAA
AID*	chrXIII	652209	1	G	A	TGCAC
AID*	chrXIII	652210	1	C	T	TGCAA
AID*	chrXIII	653869	1	C	T	TGCTC
AID*	chrXIII	659259	1	G	A	AGCTT
AID*	chrXIII	661922	1	C	T	TACTA
AID*	chrXIII	709201	1	C	T	TTCTA
AID*	chrXIII	749763	1	C	T	TCCTG
AID*	chrXIII	754264	1	G	A	ATCTA
AID*	chrXIII	759545	1	C	T	CCCTC
AID*	chrXIII	759747	1	C	T	AACAC
AID*	chrXIII	808263	1	G	A	TTCGA
AID*	chrXIII	818662	1	C	T	TGCGG
AID*	chrXIII	820563	1	C	T	AGCCA
AID*	chrXIII	821804	1	C	T	CCCTC
AID*	chrXIII	822672	1	C	T	TTCTC
AID*	chrXIII	837971	1	C	T	TACCA
AID*	chrXIII	851687	1	C	T	ATCTC
AID*	chrXIII	886892	1	C	T	AACAA
AID*	chrXIII	886932	1	C	T	AGCTA
AID*	chrXIII	914893	1	C	T	ACCTA
AID*	chrXIII	915614	1	C	T	TGCTA
AID*	chrXIV	23982	1	C	T	GACTC
AID*	chrXIV	51892	1	G	A	TGCAC
AID*	chrXIV	57219	1	G	A	TACCA
AID*	chrXIV	80461	1	C	T	TACAA
AID*	chrXIV	87790	1	C	T	AACTC
AID*	chrXIV	89029	1	G	A	AACTT
AID*	chrXIV	89042	1	G	A	ACCAC
AID*	chrXIV	89043	1	G	A	AACCA
AID*	chrXIV	102775	1	C	T	AACCC
AID*	chrXIV	104857	1	G	A	AACCG
AID*	chrXIV	108226	1	G	A	AGCTT
AID*	chrXIV	118963	1	G	A	AACGA
AID*	chrXIV	174603	1	G	A	AACAT
AID*	chrXIV	174610	1	G	A	TGCTT
AID*	chrXIV	174646	1	G	A	AGCAT
AID*	chrXIV	174647	1	C	T	TGCTA
AID*	chrXIV	174651	1	C	T	AACGA
AID*	chrXIV	174660	1	G	A	TTCCA
AID*	chrXIV	174663	1	C	T	AACAT
AID*	chrXIV	181882	1	C	T	CACAT
AID*	chrXIV	204400	1	C	T	TACCG
AID*	chrXIV	240398	1	G	A	CGCAG
AID*	chrXIV	245483	1	G	A	ACCAA
AID*	chrXIV	265839	1	G	A	AACTC
AID*	chrXIV	273084	1	G	A	ACCAT
AID*	chrXIV	281323	1	C	T	TACTA
AID*	chrXIV	281930	1	C	T	AACGA
AID*	chrXIV	282066	1	G	A	AACGA
AID*	chrXIV	292312	1	C	T	AACGT
AID*	chrXIV	297645	1	G	A	ATCTT
AID*	chrXIV	302617	1	G	A	AACAA
AID*	chrXIV	302661	1	C	T	AACAG
AID*	chrXIV	306482	1	G	A	CACCA
AID*	chrXIV	310209	1	C	T	CACAA
AID*	chrXIV	310276	1	G	A	AACTT
AID*	chrXIV	329833	1	C	T	TACCC
AID*	chrXIV	332305	1	C	T	AACCA
AID*	chrXIV	335248	1	G	A	CACGT
AID*	chrXIV	349860	1	G	A	ATCCG
AID*	chrXIV	349864	1	G	A	CTCCA
AID*	chrXIV	357089	1	C	T	TACTG
AID*	chrXIV	379557	1	G	A	AGCTT
AID*	chrXIV	413556	1	C	T	TACTT
AID*	chrXIV	422968	1	C	T	AGCAT
AID*	chrXIV	426977	1	C	T	CTCCA
AID*	chrXIV	427543	1	G	A	TGCTA
AID*	chrXIV	429713	1	G	A	AGCTT
AID*	chrXIV	448529	1	G	A	AACAT
AID*	chrXIV	491799	1	G	A	AACTA
AID*	chrXIV	494785	1	C	T	TGCGT
AID*	chrXIV	498129	1	G	A	TTCCA
AID*	chrXIV	499574	1	C	T	AACCA
AID*	chrXIV	507332	1	C	T	AACGT
AID*	chrXIV	519195	1	C	T	AACTA
AID*	chrXIV	519205	1	C	T	TACGT
AID*	chrXIV	519210	1	C	T	TACTA
AID*	chrXIV	525400	1	G	A	TACAC
AID*	chrXIV	541938	1	G	A	ACCGC
AID*	chrXIV	547123	1	C	T	CGCTT
AID*	chrXIV	547146	1	C	T	AACAG
AID*	chrXIV	559233	1	C	T	TTCAG
AID*	chrXIV	559771	1	C	T	ATCAA
AID*	chrXIV	572595	1	C	T	AGCCT
AID*	chrXIV	596898	1	C	T	ATCAT
AID*	chrXIV	601261	1	G	A	TGCTC
AID*	chrXIV	611172	1	G	A	CGCCG
AID*	chrXIV	620017	1	G	A	CGCTG
AID*	chrXIV	639189	1	C	T	AACCT
AID*	chrXIV	672673	1	C	T	AGCGA
AID*	chrXIV	685739	1	G	A	AACAG
AID*	chrXIV	693719	1	G	A	GGCCG
AID*	chrXIV	694847	1	C	T	TTCTG
AID*	chrXIV	699434	1	C	T	AGCTC
AID*	chrXIV	713710	1	G	A	AACTA
AID*	chrXIV	716108	1	C	T	TACAA
AID*	chrXIV	736520	1	C	T	AGCAA
AID*	chrXIV	759169	1	C	T	AGCAC
AID*	chrXV	34732	1	C	T	TACGA
AID*	chrXV	37923	1	C	T	AACTC
AID*	chrXV	58844	1	C	T	CTCTA
AID*	chrXV	73954	1	C	T	TACCC
AID*	chrXV	87439	1	C	T	CGCTC
AID*	chrXV	92890	1	C	T	AGCTA
AID*	chrXV	99650	1	C	T	CACCT
AID*	chrXV	99651	1	C	T	ACCTA
AID*	chrXV	99654	1	C	T	TACAA
AID*	chrXV	99659	1	C	T	AGCGT
AID*	chrXV	106509	1	C	T	TACGG
AID*	chrXV	110160	1	G	A	AGCAA
AID*	chrXV	110169	1	C	T	AGCCT
AID*	chrXV	110177	1	C	T	TACTT
AID*	chrXV	110227	1	G	A	AACCG
AID*	chrXV	110267	1	C	T	AACAT
AID*	chrXV	111913	1	C	T	AGCCG
AID*	chrXV	117623	1	C	T	AACAA
AID*	chrXV	117636	1	C	T	TGCTA
AID*	chrXV	160672	1	C	T	AACGA
AID*	chrXV	161745	1	G	A	TGCGA
AID*	chrXV	168293	1	C	T	TACTA
AID*	chrXV	179202	1	C	T	TACAT
AID*	chrXV	185220	1	C	T	ACCCA
AID*	chrXV	185382	1	C	T	AACTC
AID*	chrXV	234259	1	C	T	AACAT
AID*	chrXV	249257	1	G	A	TTCTG
AID*	chrXV	254210	1	C	T	TTCCG
AID*	chrXV	256160	1	C	T	TGCAA
AID*	chrXV	256327	1	G	A	AGCAA
AID*	chrXV	267935	1	C	T	AACCC
AID*	chrXV	267962	1	G	A	AACAA
AID*	chrXV	268128	1	C	T	AACAG
AID*	chrXV	272047	1	G	A	TTCCG
AID*	chrXV	288778	1	C	T	AACAA
AID*	chrXV	292152	1	G	A	GACTA
AID*	chrXV	292400	1	C	T	TACCA
AID*	chrXV	301188	1	C	T	CCCAG
AID*	chrXV	304662	1	G	A	AGCTT
AID*	chrXV	313025	1	C	T	TGCGA
AID*	chrXV	369394	1	G	A	TGCTC
AID*	chrXV	370930	1	C	T	TACTG
AID*	chrXV	377805	1	C	T	AACAC
AID*	chrXV	381043	1	C	T	TACGC
AID*	chrXV	389178	1	C	T	CACTG
AID*	chrXV	408187	1	C	T	AACTT
AID*	chrXV	408339	1	C	T	AGCGT
AID*	chrXV	408346	1	C	T	AGCTG
AID*	chrXV	410001	1	G	A	AACAC
AID*	chrXV	422294	1	G	A	AACAG
AID*	chrXV	431740	1	C	T	TGCTG
AID*	chrXV	444613	1	C	T	CTCAT
AID*	chrXV	447156	1	C	T	AACAT
AID*	chrXV	464540	1	C	T	TCCCA
AID*	chrXV	471669	1	G	A	TACAA
AID*	chrXV	479170	1	C	T	TACTG
AID*	chrXV	494210	1	G	A	AGCGT
AID*	chrXV	494221	1	G	A	AACTT
AID*	chrXV	495367	1	G	A	AACAG
AID*	chrXV	505703	1	G	A	TACGT
AID*	chrXV	505764	1	C	T	AGCTG
AID*	chrXV	572156	1	C	T	TACAT
AID*	chrXV	575001	1	C	T	TACTA
AID*	chrXV	592638	1	C	T	TACCT
AID*	chrXV	606213	1	C	T	AACAG
AID*	chrXV	639410	1	G	A	TACTA
AID*	chrXV	653990	1	C	T	AACAC
AID*	chrXV	658607	1	C	T	AACTT
AID*	chrXV	678833	1	G	A	AGCAC
AID*	chrXV	678852	1	C	T	ATCCT
AID*	chrXV	682467	1	C	T	CTCAT
AID*	chrXV	683881	1	C	T	CTCCC
AID*	chrXV	745366	1	C	T	AACTT
AID*	chrXV	769439	1	C	T	AGCCA
AID*	chrXV	780004	1	C	T	TGCTT
AID*	chrXV	791753	1	C	T	AACAG
AID*	chrXV	797415	1	G	A	TGCCA
AID*	chrXV	812927	1	C	T	TACGA
AID*	chrXV	813913	1	C	T	AACAG
AID*	chrXV	842369	1	C	T	TACTT
AID*	chrXV	867009	1	C	T	AACAC
AID*	chrXV	877783	1	C	T	AACTA
AID*	chrXV	880923	1	C	T	AACAA
AID*	chrXV	883163	1	C	T	TACAT
AID*	chrXV	896459	1	C	T	ATCCT
AID*	chrXV	918327	1	C	T	CACAA
AID*	chrXV	925168	1	G	A	GGCGT
AID*	chrXV	944558	1	C	T	TACGC
AID*	chrXV	953886	1	G	A	AACTC
AID*	chrXV	978343	1	G	A	ATCCT
AID*	chrXV	980899	1	C	T	TTCAT
AID*	chrXV	987734	1	C	T	AGCGG
AID*	chrXV	1003918	1	C	T	TTCTT
AID*	chrXV	1003925	1	C	T	TCCTT
AID*	chrXV	1023640	1	C	T	ATCAA
AID*	chrXV	1026770	1	C	T	TACCG
AID*	chrXV	1028580	1	C	T	AACAA
AID*	chrXV	1028725	1	C	T	AACAA
AID*	chrXV	1066795	1	C	T	TTCCT
AID*	chrXV	1073731	1	C	T	CTCAG
AID*	chrXVI	14429	1	G	A	CGCCA
AID*	chrXVI	17422	1	G	A	TGCAC
AID*	chrXVI	26041	1	G	A	TGCAG
AID*	chrXVI	40908	1	G	A	TACGT
AID*	chrXVI	46384	1	G	A	GGCGA
AID*	chrXVI	56232	1	G	A	ATCTT
AID*	chrXVI	66823	1	G	A	TACTG
AID*	chrXVI	73129	1	G	A	AACAA
AID*	chrXVI	74828	1	G	A	AGCAA
AID*	chrXVI	75591	1	G	A	ATCAT
AID*	chrXVI	82394	1	G	A	ATCAT
AID*	chrXVI	98703	1	G	A	CGCTG
AID*	chrXVI	100414	1	C	T	GACAT
AID*	chrXVI	118218	1	G	A	AACCT
AID*	chrXVI	125808	1	G	A	AGCCA
AID*	chrXVI	132224	1	G	A	AGCTA
AID*	chrXVI	135511	1	G	A	CTCTA
AID*	chrXVI	143824	1	G	A	AACCA
AID*	chrXVI	153438	1	G	A	TACGA
AID*	chrXVI	173074	1	G	A	AGCAA
AID*	chrXVI	195638	1	G	A	AACTA
AID*	chrXVI	198825	1	G	A	ACCGT
AID*	chrXVI	203175	1	G	A	AGCTG
AID*	chrXVI	238805	1	G	A	AACCC
AID*	chrXVI	240137	1	G	A	ATCAA
AID*	chrXVI	240882	1	G	A	TACAA
AID*	chrXVI	255133	1	G	A	CACCA
AID*	chrXVI	261213	1	G	A	AACTG
AID*	chrXVI	345140	1	G	A	GACAA
AID*	chrXVI	348298	1	G	A	AGCTA
AID*	chrXVI	354863	1	G	A	TGCAA
AID*	chrXVI	357318	1	G	A	AGCAC
AID*	chrXVI	378464	1	G	A	TGCTT
AID*	chrXVI	381664	1	G	A	TACGT
AID*	chrXVI	425674	1	G	A	TACGT
AID*	chrXVI	427852	1	G	A	AACCA
AID*	chrXVI	433619	1	C	T	AACTT
AID*	chrXVI	453225	1	G	A	AACAT
AID*	chrXVI	453257	1	G	A	TTCTT
AID*	chrXVI	453290	1	C	T	AGCCT
AID*	chrXVI	464294	1	G	A	AACAC
AID*	chrXVI	482004	1	G	A	TGCTT
AID*	chrXVI	489528	1	G	A	TACAA
AID*	chrXVI	503971	1	G	A	TACTT
AID*	chrXVI	517280	1	G	A	CACAC
AID*	chrXVI	520579	1	G	A	TGCAT
AID*	chrXVI	534738	1	G	A	AACAG
AID*	chrXVI	534749	1	G	A	TACTA
AID*	chrXVI	534766	1	G	A	AGCAA
AID*	chrXVI	534775	1	G	A	AGCTT
AID*	chrXVI	538516	1	G	A	AGCAT
AID*	chrXVI	551810	1	G	A	AACCG
AID*	chrXVI	581275	1	G	A	TACTT
AID*	chrXVI	581316	1	G	A	CGCAT
AID*	chrXVI	582840	1	G	A	AACTC
AID*	chrXVI	593207	1	G	A	TACTG
AID*	chrXVI	601724	1	G	A	TGCAA
AID*	chrXVI	610133	1	G	A	AACGT
AID*	chrXVI	632231	1	G	A	TGCCT
AID*	chrXVI	642038	1	G	A	AGCCT
AID*	chrXVI	642069	1	G	A	AACAA
AID*	chrXVI	645846	1	C	T	TTCCT
AID*	chrXVI	645847	1	C	T	TCCTC
AID*	chrXVI	645852	1	G	A	GACTA
AID*	chrXVI	653712	1	C	T	CTCTA
AID*	chrXVI	653805	1	G	A	TACTG
AID*	chrXVI	654045	1	G	A	CACTG
AID*	chrXVI	689604	1	C	T	ATCTG
AID*	chrXVI	694905	1	G	A	AACTG
AID*	chrXVI	694939	1	G	A	TCCTT
AID*	chrXVI	695010	1	G	A	CCCCT
AID*	chrXVI	709948	1	G	A	AACGG
AID*	chrXVI	710190	1	C	T	TACCC
AID*	chrXVI	711915	1	C	T	CCCTA
AID*	chrXVI	725007	1	G	A	AACAG
AID*	chrXVI	731851	1	G	A	ACCGC
AID*	chrXVI	732464	1	G	A	AACGT
AID*	chrXVI	769255	1	G	A	TGCTT
AID*	chrXVI	790597	1	C	T	AGCTA
AID*	chrXVI	812135	1	G	A	ATCCT
AID*	chrXVI	837510	1	C	T	GACCC
AID*	chrXVI	837596	1	C	T	CGCAT
AID*	chrXVI	879599	1	G	A	AACAA
AID*	chrXVI	883039	1	G	A	TGCAG
AID*	chrXVI	919297	1	G	A	AACTT
AID*	chrI	7416	1	G	A	TACTT
AID*	chrI	27564	1	G	A	AACGT
AID*	chrI	31167	1	C	T	TGCAC
AID*	chrI	43173	1	G	A	AGCAG
AID*	chrI	48437	1	C	T	TACGC
AID*	chrI	71647	1	G	A	GACCA
AID*	chrI	142078	1	G	A	AACTA
AID*	chrI	183683	1	G	A	TACTA
AID*	chrII	43367	1	G	A	TACAA
AID*	chrII	45573	1	G	A	ATCTA
AID*	chrII	168364	1	G	A	AGCAC
AID*	chrII	236329	1	C	T	AACAC
AID*	chrII	236985	1	G	A	ATCAT
AID*	chrII	275536	1	G	A	TTCCC
AID*	chrII	275570	1	C	T	TGCTC
AID*	chrII	275574	1	G	A	TGCAG
AID*	chrII	275942	1	C	T	CACTG
AID*	chrII	277111	1	C	T	TACCC
AID*	chrII	278345	1	G	A	AGCTC
AID*	chrII	278379	1	C	T	TACTT
AID*	chrII	278398	1	C	T	CGCAA
AID*	chrII	278426	1	G	A	TGCCA
AID*	chrII	280724	1	G	A	AGCAT
AID*	chrII	301238	1	C	T	AACTT
AID*	chrII	315508	1	C	T	AACCG
AID*	chrII	332760	1	C	T	AACAT
AID*	chrII	347643	1	C	T	ATCTG
AID*	chrII	356441	1	G	A	TACTA
AID*	chrII	371804	1	G	A	AACGT
AID*	chrII	380351	1	C	T	TACGA
AID*	chrII	419781	1	C	T	TGCGC
AID*	chrII	452072	1	C	T	ATCCG
AID*	chrII	465888	1	G	A	TACCT
AID*	chrII	477576	1	C	T	CTCTC
AID*	chrII	532261	1	G	A	AACGA
AID*	chrII	532273	1	C	T	CACCA
AID*	chrII	561153	1	G	A	AGCTC
AID*	chrII	657747	1	G	A	CACTA
AID*	chrII	660692	1	C	T	AGCAT
AID*	chrII	667887	1	G	A	TACTC
AID*	chrII	680109	1	G	A	CGCCG
AID*	chrII	744141	1	C	T	TCCGT
AID*	chrII	768181	1	C	T	TGCTT
AID*	chrII	788755	1	G	A	TGCAC
AID*	chrII	792913	1	G	A	CGCTA
AID*	chrIII	278	1	C	A	ACCCA
AID*	chrIII	65625	1	C	T	TGCCT
AID*	chrIII	123302	1	C	T	AGCAG
AID*	chrIII	137653	1	C	T	TTCGT
AID*	chrIII	165944	1	C	T	ATCAT
AID*	chrIII	190527	1	C	T	CACTA
AID*	chrIII	233970	1	C	T	TTCAG
AID*	chrIII	246916	1	C	T	TCCAG
AID*	chrIII	306790	1	C	T	AGCTG
AID*	chrIV	34084	1	G	A	AACCT
AID*	chrIV	42655	1	G	A	AACTC
AID*	chrIV	87266	1	G	A	AACGA
AID*	chrIV	101651	1	G	A	TACCG
AID*	chrIV	121812	1	G	A	AACCA
AID*	chrIV	130558	1	G	A	TTCTA
AID*	chrIV	147658	1	G	A	AGCTT
AID*	chrIV	176955	1	C	T	AGCAT
AID*	chrIV	219914	1	C	T	TGCTC
AID*	chrIV	221286	1	G	A	TGCTT
AID*	chrIV	221893	1	C	T	AACAA
AID*	chrIV	264200	1	C	T	TACTC
AID*	chrIV	294346	1	G	A	AGCAA
AID*	chrIV	314818	1	G	A	TACCA
AID*	chrIV	322158	1	C	T	AACTA
AID*	chrIV	326408	1	C	T	TTCAT
AID*	chrIV	333265	1	C	T	TTCTG
AID*	chrIV	386696	1	G	A	TGCCG
AID*	chrIV	405030	1	G	A	AACTG
AID*	chrIV	434275	1	G	A	TCCGA
AID*	chrIV	436874	1	G	A	ATCGT
AID*	chrIV	439597	1	C	T	TGCAA
AID*	chrIV	439652	1	C	T	TTCGT
AID*	chrIV	507793	1	C	T	AACTT
AID*	chrIV	519783	1	C	T	ATCTG
AID*	chrIV	520989	1	G	A	AACCA
AID*	chrIV	544339	1	G	A	AGCGC
AID*	chrIV	556686	1	G	A	TGCAA
AID*	chrIV	577582	1	C	T	TGCTG
AID*	chrIV	600728	1	G	A	TACAA
AID*	chrIV	610689	1	G	A	AACTG
AID*	chrIV	610739	1	G	A	TACAA
AID*	chrIV	641426	1	C	T	GTCAT
AID*	chrIV	703058	1	C	T	ATCCT
AID*	chrIV	703880	1	C	T	TACCA
AID*	chrIV	721534	1	G	A	ACCAA
AID*	chrIV	721535	1	G	A	AACCA
AID*	chrIV	755552	1	G	A	AACCG
AID*	chrIV	802785	1	C	T	AACCA
AID*	chrIV	806248	1	C	T	AACAG
AID*	chrIV	808667	1	C	T	AGCTG
AID*	chrIV	815484	1	C	T	AACTA
AID*	chrIV	861512	1	G	A	TGCTA
AID*	chrIV	914912	1	G	A	TACTA
AID*	chrIV	926967	1	C	T	TGCTT
AID*	chrIV	930502	1	C	T	TGCCA
AID*	chrIV	936189	1	C	T	TGCCA
AID*	chrIV	969384	1	C	T	TTCCC
AID*	chrIV	980928	1	C	T	TACTA
AID*	chrIV	1002282	1	G	A	TTCGG
AID*	chrIV	1008945	1	G	A	ATCTA
AID*	chrIV	1017211	1	G	A	TTCGG
AID*	chrIV	1039581	1	G	A	TACAA
AID*	chrIV	1049197	1	G	A	AGCAA
AID*	chrIV	1052302	1	C	T	AACGG
AID*	chrIV	1056516	1	G	A	GACTA
AID*	chrIV	1064304	1	C	T	TGCTG
AID*	chrIV	1072634	1	G	A	TACTA
AID*	chrIV	1082747	1	C	T	AACCG
AID*	chrIV	1113986	1	C	T	AACTT
AID*	chrIV	1116769	1	G	A	AGCTA
AID*	chrIV	1153674	1	C	T	TACAA
AID*	chrIV	1165916	1	G	A	ATCAA
AID*	chrIV	1183414	1	G	A	TACCG
AID*	chrIV	1183957	1	G	A	TACCA
AID*	chrIV	1201816	1	C	T	TACAG
AID*	chrIV	1225585	1	G	A	TACTG
AID*	chrIV	1236416	1	C	T	TTCCT
AID*	chrIV	1236437	1	G	A	ACCTA
AID*	chrIV	1239385	1	G	A	ATCAA
AID*	chrIV	1242135	1	C	T	ATCAA
AID*	chrIV	1243182	1	G	A	TGCTA
AID*	chrIV	1350045	1	G	A	AACAA
AID*	chrIV	1388339	1	G	A	TTCAA
AID*	chrIV	1403082	1	C	T	TACAT
AID*	chrIV	1411666	1	C	T	TACGT
AID*	chrIV	1421524	1	C	T	AGCTT
AID*	chrIV	1445578	1	C	T	TGCCA
AID*	chrIV	1447492	1	G	A	AACAT
AID*	chrIV	1454572	1	C	T	TACTT
AID*	chrIV	1454924	1	C	T	AACTT
AID*	chrIV	1468568	1	G	A	AACAT
AID*	chrIV	1483679	1	C	T	TGCTA
AID*	chrIV	1489366	1	C	T	TACAT
AID*	chrIV	1489883	1	G	A	TACTT
AID*	chrIV	1495666	1	C	T	TACTA
AID*	chrIX	28321	1	G	A	AGCTA
AID*	chrIX	43369	1	G	A	AACAA
AID*	chrIX	58492	1	C	T	TACAT
AID*	chrIX	73670	1	G	A	AGCAC
AID*	chrIX	87180	1	C	T	AGCGT
AID*	chrIX	88465	1	G	A	AACGA
AID*	chrIX	96842	1	G	A	TTCAG
AID*	chrIX	99475	1	C	T	AGCGT
AID*	chrIX	104482	1	C	T	AACTC
AID*	chrIX	129808	1	G	A	TACTA
AID*	chrIX	138876	1	G	A	AGCTA
AID*	chrIX	139590	1	G	A	TTCTT
AID*	chrIX	139673	1	C	T	AGCTC
AID*	chrIX	155316	1	C	T	TGCGT
AID*	chrIX	160648	1	G	A	AACAT
AID*	chrIX	169168	1	G	A	TCCTT
AID*	chrIX	183439	1	G	A	CACTT
AID*	chrIX	229957	1	C	T	TGCGT
AID*	chrIX	243817	1	C	T	AGCTT
AID*	chrIX	324267	1	G	A	TACTT
AID*	chrIX	337390	1	G	A	TGCCA
AID*	chrIX	352910	1	G	A	AACCA
AID*	chrIX	353694	1	C	T	AACTC
AID*	chrIX	370833	1	G	A	AGCGT
AID*	chrIX	384593	1	G	A	TGCTA
AID*	chrV	7870	1	C	T	CACCG
AID*	chrV	19797	1	G	A	CACAT
AID*	chrV	32075	1	C	T	AACCA
AID*	chrV	32568	1	G	A	TACTG
AID*	chrV	34725	1	G	A	AGCTG
AID*	chrV	43407	1	G	A	AGCGA
AID*	chrV	68934	1	G	A	TTCTC
AID*	chrV	94178	1	C	T	TGCTA
AID*	chrV	100149	1	G	A	TCCAC
AID*	chrV	123297	1	G	A	CACTG
AID*	chrV	154813	1	G	A	ATCAA
AID*	chrV	156912	1	C	T	TGCAG
AID*	chrV	167639	1	C	T	AACAA
AID*	chrV	167644	1	G	A	TACTA
AID*	chrV	208545	1	C	T	CACAA
AID*	chrV	213993	1	C	T	AGCAG
AID*	chrV	222557	1	C	T	AACGT
AID*	chrV	225914	1	C	T	AACAA
AID*	chrV	237460	1	G	A	AGCAA
AID*	chrV	237765	1	C	T	TACAT
AID*	chrV	292724	1	C	T	AACCT
AID*	chrV	303214	1	G	A	TACGA
AID*	chrV	312028	1	G	A	TGCGT
AID*	chrV	325438	1	C	T	AGCAA
AID*	chrV	368680	1	C	T	AGCTG
AID*	chrV	374657	1	C	T	AGCTT
AID*	chrV	396714	1	G	A	CTCGC
AID*	chrV	397300	1	G	A	AGCAC
AID*	chrV	409143	1	G	A	TGCAT
AID*	chrV	424630	1	G	A	AACCT
AID*	chrV	430913	1	C	T	CGCAA
AID*	chrV	431289	1	G	A	CGCTG
AID*	chrV	442020	1	G	A	AACGT
AID*	chrV	442068	1	G	A	ATCCG
AID*	chrV	442192	1	G	A	AACGG
AID*	chrV	465085	1	G	A	ATCAA
AID*	chrV	469042	1	G	A	AACAA
AID*	chrV	474985	1	C	T	CACGT
AID*	chrV	539308	1	G	A	TACCA
AID*	chrV	545520	1	G	A	TGCAG
AID*	chrVI	32991	1	G	A	TACTA
AID*	chrVI	44529	1	C	T	AACAC
AID*	chrVI	65571	1	C	T	ATCCA
AID*	chrVI	79967	1	C	T	ATCGT
AID*	chrVI	175961	1	C	T	AACCC
AID*	chrVI	182654	1	C	T	TGCGT
AID*	chrVI	196379	1	C	T	AACTC
AID*	chrVII	22143	1	C	T	TTCTA
AID*	chrVII	23154	1	G	A	AGCTG
AID*	chrVII	23843	1	C	T	AACTT
AID*	chrVII	68250	1	C	T	TACTA
AID*	chrVII	112177	1	C	T	CGCTA
AID*	chrVII	114901	1	C	T	AGCCA
AID*	chrVII	115541	1	C	T	AGCAA
AID*	chrVII	122294	1	G	A	TACGC
AID*	chrVII	136091	1	G	A	TTCCG
AID*	chrVII	140348	1	C	T	AACCG
AID*	chrVII	179279	1	C	T	ATCCA
AID*	chrVII	185720	1	G	A	TACAG
AID*	chrVII	205622	1	C	T	ATCTC
AID*	chrVII	212960	1	G	A	AACGG
AID*	chrVII	218668	1	C	T	ACCAT
AID*	chrVII	252920	1	G	A	AACTG
AID*	chrVII	254524	1	C	T	CACTT
AID*	chrVII	310930	1	G	A	TGCAA
AID*	chrVII	316656	1	C	T	AACTA
AID*	chrVII	319810	1	C	T	ATCGT
AID*	chrVII	326540	1	C	T	TCCCT
AID*	chrVII	355579	1	C	T	TACCT
AID*	chrVII	366837	1	C	T	TGCTG
AID*	chrVII	413702	1	C	T	TTCCT
AID*	chrVII	440761	1	G	A	TTCGG
AID*	chrVII	461265	1	G	A	CGCTA
AID*	chrVII	482912	1	G	A	TCCTA
AID*	chrVII	482947	1	G	A	AACAT
AID*	chrVII	493860	1	C	T	AGCAA
AID*	chrVII	516419	1	C	T	AACAG
AID*	chrVII	545123	1	G	A	TGCGT
AID*	chrVII	555723	1	G	A	AGCTA
AID*	chrVII	575970	1	C	T	TACAG
AID*	chrVII	586771	1	C	T	ACCTA
AID*	chrVII	605587	1	G	A	AACGA
AID*	chrVII	619998	1	C	T	AACTT
AID*	chrVII	624872	1	C	T	AGCTC
AID*	chrVII	650767	1	C	T	AACAA
AID*	chrVII	700995	1	G	A	AGCAA
AID*	chrVII	701740	1	C	T	CACCA
AID*	chrVII	703643	1	G	A	ATCGT
AID*	chrVII	763689	1	G	A	TTCCA
AID*	chrVII	802252	1	C	T	CTCTT
AID*	chrVII	857383	1	G	A	AGCAA
AID*	chrVII	878747	1	G	A	TGCAA
AID*	chrVII	880111	1	C	T	GACAA
AID*	chrVII	883862	1	C	T	AACTA
AID*	chrVII	920542	1	G	A	AGCTA
AID*	chrVII	932059	1	C	T	ATCCT
AID*	chrVII	974115	1	C	T	AGCAA
AID*	chrVII	974120	1	C	T	AACAA
AID*	chrVII	976762	1	C	T	AACCA
AID*	chrVII	1036229	1	C	T	TACAC
AID*	chrVII	1050106	1	C	T	TACTA
AID*	chrVII	1063655	1	G	A	CACGC
AID*	chrVII	1066750	1	C	T	ATCAA
AID*	chrVII	1081434	1	C	T	CGCAT
AID*	chrVIII	18675	1	G	A	AACTA
AID*	chrVIII	48705	1	G	A	AACAA
AID*	chrVIII	66595	1	G	A	AGCAA
AID*	chrVIII	98099	1	C	T	AGCAT
AID*	chrVIII	168006	1	G	A	ACCAG
AID*	chrVIII	173035	1	G	A	ATCTC
AID*	chrVIII	203864	1	G	A	AGCTT
AID*	chrVIII	241590	1	G	A	AGCCA
AID*	chrVIII	296673	1	C	T	TACGT
AID*	chrVIII	336292	1	G	A	CACAT
AID*	chrVIII	344230	1	C	T	AGCTA
AID*	chrVIII	379479	1	C	T	TGCTA
AID*	chrVIII	388923	1	C	T	CTCTC
AID*	chrVIII	388943	1	G	A	AACAG
AID*	chrVIII	425198	1	G	A	ATCGA
AID*	chrVIII	441527	1	G	A	AACCC
AID*	chrVIII	451303	1	C	T	AACTA
AID*	chrVIII	470856	1	G	A	CACTA
AID*	chrVIII	475330	1	C	T	AACCT
AID*	chrVIII	508864	1	G	A	AACAA
AID*	chrVIII	512392	1	C	T	AGCAA
AID*	chrVIII	517456	1	G	A	TACCA
AID*	chrVIII	525335	1	C	T	TGCTC
AID*	chrX	24111	1	G	A	AGCAG
AID*	chrX	75325	1	G	A	AACAA
AID*	chrX	90632	1	G	A	TACAC
AID*	chrX	90660	1	G	A	ACCAA
AID*	chrX	95512	1	G	A	AACAC
AID*	chrX	106342	1	C	T	AACAT
AID*	chrX	115980	1	C	T	AGCGT
AID*	chrX	120366	1	C	T	TCCTT
AID*	chrX	173069	1	C	T	AGCAA
AID*	chrX	187831	1	G	A	ATCTA
AID*	chrX	195704	1	G	A	TACAC
AID*	chrX	227912	1	G	A	TACAT
AID*	chrX	228528	1	G	A	TACTT
AID*	chrX	327986	1	G	A	TGCAT
AID*	chrX	330524	1	G	A	TACAA
AID*	chrX	334131	1	G	A	TACAG
AID*	chrX	337304	1	G	A	AACGC
AID*	chrX	401720	1	G	A	TTCCC
AID*	chrX	407479	1	C	T	AGCAT
AID*	chrX	415011	1	G	A	AACCT
AID*	chrX	415942	1	G	A	TCCTG
AID*	chrX	421873	1	C	T	AACTC
AID*	chrX	424465	1	C	T	AACCG
AID*	chrX	424467	1	G	A	GACGG
AID*	chrX	454776	1	C	T	CACAA
AID*	chrX	456520	1	C	T	AACCA
AID*	chrX	513909	1	G	A	CACTT
AID*	chrX	530793	1	G	A	TGCAA
AID*	chrX	550810	1	G	A	TACGT
AID*	chrX	572991	1	G	A	TTCTT
AID*	chrX	612165	1	C	T	AGCTG
AID*	chrX	627447	1	C	T	AACTT
AID*	chrX	663694	1	G	A	AGCGA
AID*	chrX	667143	1	C	T	TTCTT
AID*	chrX	700737	1	C	T	TGCAT
AID*	chrX	712685	1	G	A	TACTA
AID*	chrXI	38618	1	G	A	AACAA
AID*	chrXI	82616	1	G	A	AGCGT
AID*	chrXI	115352	1	C	T	AACAA
AID*	chrXI	166476	1	G	A	AACGT
AID*	chrXI	171548	1	C	T	TACTT
AID*	chrXI	179396	1	C	T	TCCCA
AID*	chrXI	196155	1	C	T	AACGA
AID*	chrXI	210519	1	C	T	AGCAG
AID*	chrXI	231864	1	C	T	ATCAA
AID*	chrXI	260428	1	C	T	TGCTG
AID*	chrXI	264379	1	C	T	TGCAA
AID*	chrXI	270145	1	C	T	AGCCA
AID*	chrXI	278671	1	C	T	TACGC
AID*	chrXI	307080	1	G	A	AACTG
AID*	chrXI	356895	1	C	T	TCCAA
AID*	chrXI	356920	1	C	T	TGCTA
AID*	chrXI	360314	1	G	A	AACAT
AID*	chrXI	383240	1	G	A	TCCCA
AID*	chrXI	387387	1	G	A	AGCTC
AID*	chrXI	456859	1	C	T	TCCGG
AID*	chrXI	475237	1	C	A	ATCCT
AID*	chrXI	533839	1	C	T	ATCCT
AID*	chrXI	559400	1	C	T	ATCAA
AID*	chrXI	559412	1	G	A	TGCCC
AID*	chrXI	615559	1	G	A	AACGG
AID*	chrXI	640683	1	C	T	AACTT
AID*	chrXI	646784	1	C	T	TACTG
AID*	chrXII	24657	1	C	T	ATCTT
AID*	chrXII	49626	1	G	A	AACAT
AID*	chrXII	86392	1	C	T	TGCAT
AID*	chrXII	91789	1	C	T	AACTT
AID*	chrXII	121287	1	C	T	AGCAG
AID*	chrXII	150452	1	G	A	TACGC
AID*	chrXII	187338	1	C	T	AGCTT
AID*	chrXII	190275	1	C	T	TACAT
AID*	chrXII	198796	1	G	A	CACGA
AID*	chrXII	214893	1	C	T	ACCGG
AID*	chrXII	214903	1	C	T	AACCG
AID*	chrXII	214920	1	G	A	TGCAA
AID*	chrXII	231635	1	C	T	GTCTA
AID*	chrXII	234177	1	C	T	AACAA
AID*	chrXII	270614	1	C	T	ATCTC
AID*	chrXII	282528	1	G	A	AGCGG
AID*	chrXII	282862	1	C	T	TCCGC
AID*	chrXII	290106	1	G	A	CACCA
AID*	chrXII	290111	1	G	A	CACAA
AID*	chrXII	290131	1	C	T	TGCAC
AID*	chrXII	296249	1	C	T	TTCAA
AID*	chrXII	325188	1	G	A	TACCG
AID*	chrXII	366295	1	C	T	AGCAG
AID*	chrXII	366306	1	C	T	TGCAT
AID*	chrXII	370192	1	G	A	ATCCT
AID*	chrXII	374343	1	C	T	AACAA
AID*	chrXII	377084	1	C	T	AACCA
AID*	chrXII	382737	1	C	T	AACTA
AID*	chrXII	387751	1	C	T	CACTG
AID*	chrXII	433828	1	C	T	AACCT
AID*	chrXII	495301	1	C	T	TACAT
AID*	chrXII	498260	1	C	T	ACCGT
AID*	chrXII	515156	1	G	A	CACCA
AID*	chrXII	539672	1	C	T	AGCGA
AID*	chrXII	541948	1	C	T	AACAA
AID*	chrXII	549148	1	C	T	TACAC
AID*	chrXII	575240	1	G	A	ATCCG
AID*	chrXII	605333	1	C	T	CGCGT
AID*	chrXII	626989	1	C	T	AACAG
AID*	chrXII	645458	1	G	A	TACAA
AID*	chrXII	646082	1	G	A	AACCG
AID*	chrXII	659619	1	G	A	TGCTG
AID*	chrXII	669277	1	C	T	CGCAA
AID*	chrXII	669928	1	G	A	AACAG
AID*	chrXII	691493	1	G	A	CACGT
AID*	chrXII	728792	1	G	A	AACGT
AID*	chrXII	765800	1	G	A	AACGG
AID*	chrXII	767687	1	C	T	TACTG
AID*	chrXII	781412	1	C	T	AACCT
AID*	chrXII	786526	1	G	A	AGCAG
AID*	chrXII	793959	1	C	T	TGCCA
AID*	chrXII	801317	1	C	T	TACAA
AID*	chrXII	837494	1	C	T	TACAG
AID*	chrXII	841122	1	C	T	CACAT
AID*	chrXII	875415	1	C	T	AGCGC
AID*	chrXII	878055	1	G	A	AACAA
AID*	chrXII	898125	1	G	A	AGCTA
AID*	chrXII	898126	1	C	T	AGCTG
AID*	chrXII	919060	1	G	A	AACAA
AID*	chrXII	951095	1	C	T	AGCTT
AID*	chrXII	1002286	1	C	T	AACAA
AID*	chrXII	1028824	1	C	T	AACTT
AID*	chrXII	1052112	1	G	A	TGCTA
AID*	chrXIII	30540	1	G	A	TACGT
AID*	chrXIII	38058	1	C	T	TACAG
AID*	chrXIII	58840	1	C	T	CACAA
AID*	chrXIII	121394	1	G	A	CACGT
AID*	chrXIII	131858	1	G	A	ATCAG
AID*	chrXIII	146414	1	C	T	AGCAG
AID*	chrXIII	149939	1	C	T	AACTA
AID*	chrXIII	152942	1	C	T	AACAA
AID*	chrXIII	170300	1	C	T	AGCAA
AID*	chrXIII	170329	1	G	A	ATCTT
AID*	chrXIII	171348	1	C	T	TACCC
AID*	chrXIII	244460	1	G	A	GGCAA
AID*	chrXIII	253136	1	G	A	TGCTG
AID*	chrXIII	259222	1	C	T	AACCA
AID*	chrXIII	306341	1	C	T	TGCAG
AID*	chrXIII	311177	1	C	T	AACCT
AID*	chrXIII	318996	1	C	T	AGCGG
AID*	chrXIII	323170	1	C	T	AACAG
AID*	chrXIII	344322	1	C	T	AACAA
AID*	chrXIII	393524	1	G	A	TGCGC
AID*	chrXIII	418621	1	C	T	CGCTG
AID*	chrXIII	432270	1	C	T	ATCGT
AID*	chrXIII	434741	1	G	A	AACAG
AID*	chrXIII	439112	1	C	T	TACTT
AID*	chrXIII	455680	1	C	T	ACCTG
AID*	chrXIII	469342	1	C	T	AACAA
AID*	chrXIII	477710	1	C	T	ATCTT
AID*	chrXIII	478080	1	C	T	TACAG
AID*	chrXIII	478951	1	C	T	AACGG
AID*	chrXIII	527598	1	G	A	AACAT
AID*	chrXIII	572070	1	G	A	AACGA
AID*	chrXIII	574468	1	C	T	AACTG
AID*	chrXIII	589873	1	G	A	ACCAA
AID*	chrXIII	623425	1	C	T	AGCCC
AID*	chrXIII	632318	1	C	T	CGCTA
AID*	chrXIII	652210	1	C	T	TGCAA
AID*	chrXIII	675519	1	C	T	GACTG
AID*	chrXIII	680505	1	C	T	TACCT
AID*	chrXIII	693309	1	C	T	AGCAT
AID*	chrXIII	701203	1	C	T	TCCTG
AID*	chrXIII	747912	1	C	T	AACCC
AID*	chrXIII	756358	1	C	T	AACAG
AID*	chrXIII	759386	1	C	T	AACCG
AID*	chrXIII	852524	1	C	T	TTCTT
AID*	chrXIII	922620	1	C	T	CACTA
AID*	chrXIV	24025	1	C	T	AACAA
AID*	chrXIV	43143	1	G	A	TACGC
AID*	chrXIV	102775	1	C	T	AACCC
AID*	chrXIV	110530	1	C	T	AACTC
AID*	chrXIV	122256	1	C	T	AACGT
AID*	chrXIV	148000	1	G	A	TTCTC
AID*	chrXIV	174635	1	C	T	AGCGG
AID*	chrXIV	185287	1	C	T	AACTA
AID*	chrXIV	241354	1	G	A	TACAT
AID*	chrXIV	252034	1	C	T	AACCA
AID*	chrXIV	254363	1	C	T	AACAC
AID*	chrXIV	271130	1	G	A	TACGA
AID*	chrXIV	282017	1	G	A	AGCAC
AID*	chrXIV	289360	1	C	T	TGCAC
AID*	chrXIV	301684	1	G	A	AACAA
AID*	chrXIV	308705	1	G	A	AGCAT
AID*	chrXIV	310519	1	G	A	AGCAC
AID*	chrXIV	312435	1	G	A	TACTC
AID*	chrXIV	313681	1	G	A	AACAC
AID*	chrXIV	326522	1	C	T	TCCAG
AID*	chrXIV	366682	1	C	T	AACTC
AID*	chrXIV	400606	1	G	A	ACCAC
AID*	chrXIV	415356	1	C	T	AACAA
AID*	chrXIV	439485	1	C	T	AGCAA
AID*	chrXIV	443060	1	G	A	AACTG
AID*	chrXIV	507332	1	C	T	AACGT
AID*	chrXIV	507364	1	C	T	TACGT
AID*	chrXIV	507595	1	C	T	AACTC
AID*	chrXIV	507755	1	C	T	AACAT
AID*	chrXIV	511220	1	C	T	TACGT
AID*	chrXIV	538536	1	C	T	CTCCG
AID*	chrXIV	546239	1	G	A	CACCA
AID*	chrXIV	569911	1	C	T	CACGG
AID*	chrXIV	576124	1	C	T	AACAG
AID*	chrXIV	586814	1	C	T	TGCAG
AID*	chrXIV	591765	1	G	A	AGCTG
AID*	chrXIV	613398	1	C	T	ATCAA
AID*	chrXIV	616133	1	G	A	AACAC
AID*	chrXIV	619749	1	G	A	TGCGC
AID*	chrXIV	625898	1	C	T	TACAA
AID*	chrXIV	631867	1	C	T	ACCCG
AID*	chrXIV	631868	1	C	T	CCCGG
AID*	chrXIV	640343	1	C	T	AACAG
AID*	chrXIV	661897	1	C	T	AACCG
AID*	chrXIV	677838	1	C	T	TGCCA
AID*	chrXIV	715443	1	C	T	TACTG
AID*	chrXIV	726175	1	C	T	AACAG
AID*	chrXIV	736686	1	C	T	ACCTA
AID*	chrXIV	759147	1	G	A	AACCA
AID*	chrXV	8662	1	C	T	CACAC
AID*	chrXV	40344	1	C	T	ACCTC
AID*	chrXV	49330	1	C	T	AGCGA
AID*	chrXV	61150	1	C	T	TGCAA
AID*	chrXV	80308	1	G	A	AGCAG
AID*	chrXV	85449	1	C	T	TGCAT
AID*	chrXV	87456	1	C	T	CACTG
AID*	chrXV	89195	1	C	T	AACTA
AID*	chrXV	93821	1	G	A	AACAA
AID*	chrXV	97805	1	C	T	GACGA
AID*	chrXV	110222	1	G	A	ATCAA
AID*	chrXV	113976	1	C	T	TACTA
AID*	chrXV	186790	1	G	A	TACTT
AID*	chrXV	231619	1	G	A	CGCCG
AID*	chrXV	233798	1	G	A	TGCAT
AID*	chrXV	234227	1	G	A	AGCTC
AID*	chrXV	259328	1	C	T	TACAC
AID*	chrXV	267756	1	G	A	AACGT
AID*	chrXV	280653	1	C	T	TCCAA
AID*	chrXV	281148	1	C	T	CACAG
AID*	chrXV	288241	1	C	T	TACGA
AID*	chrXV	301148	1	C	T	AACAG
AID*	chrXV	303224	1	C	T	AACCT
AID*	chrXV	330881	1	G	A	AGCAA
AID*	chrXV	370923	1	G	A	AACTT
AID*	chrXV	379588	1	G	A	ATCGT
AID*	chrXV	386743	1	C	T	AACTC
AID*	chrXV	394840	1	G	A	AACTA
AID*	chrXV	416888	1	G	A	GACAT
AID*	chrXV	421857	1	C	T	TACCT
AID*	chrXV	441222	1	G	A	AACTA
AID*	chrXV	444642	1	G	A	AACCG
AID*	chrXV	447091	1	C	T	AGCTT
AID*	chrXV	470789	1	C	T	TGCGT
AID*	chrXV	487481	1	C	T	CGCAA
AID*	chrXV	505703	1	G	A	TACGT
AID*	chrXV	519176	1	C	T	ACCAC
AID*	chrXV	538518	1	G	A	TACAT
AID*	chrXV	566251	1	G	A	TTCTA
AID*	chrXV	570458	1	G	A	AGCGG
AID*	chrXV	594386	1	G	A	AGCAT
AID*	chrXV	594395	1	G	A	TGCTT
AID*	chrXV	670627	1	C	T	AACTA
AID*	chrXV	683989	1	C	T	TGCTT
AID*	chrXV	689142	1	C	T	AGCTA
AID*	chrXV	745410	1	G	A	AACTA
AID*	chrXV	757814	1	C	T	AACTT
AID*	chrXV	780059	1	G	A	TACTA
AID*	chrXV	782138	1	C	T	AACAT
AID*	chrXV	796897	1	G	A	TACAA
AID*	chrXV	854339	1	C	T	CACAT
AID*	chrXV	855807	1	C	T	TCCAT
AID*	chrXV	859892	1	G	A	TGCCA
AID*	chrXV	867070	1	C	T	AGCAA
AID*	chrXV	895990	1	G	A	CGCCA
AID*	chrXV	944436	1	G	A	CACAG
AID*	chrXV	967882	1	G	A	TTCAC
AID*	chrXV	969612	1	G	A	AGCTA
AID*	chrXV	989738	1	G	A	ATCGT
AID*	chrXV	989834	1	C	T	TTCAG
AID*	chrXV	1003918	1	C	T	TTCTT
AID*	chrXV	1048411	1	G	A	AGCTT
AID*	chrXV	1064579	1	C	T	TACTC
AID*	chrXVI	29297	1	C	T	ATCAG
AID*	chrXVI	29842	1	C	T	TCCTT
AID*	chrXVI	30023	1	C	T	AGCAA
AID*	chrXVI	32969	1	G	A	TTCGT
AID*	chrXVI	48526	1	G	A	ATCGA
AID*	chrXVI	66810	1	C	T	TTCAC
AID*	chrXVI	76304	1	G	A	AGCGT
AID*	chrXVI	98704	1	C	T	AGCGG
AID*	chrXVI	117024	1	C	T	AGCAG
AID*	chrXVI	124520	1	C	T	TCCAG
AID*	chrXVI	125764	1	C	T	CACAG
AID*	chrXVI	147389	1	C	T	AACAA
AID*	chrXVI	150296	1	G	A	AGCGG
AID*	chrXVI	166910	1	C	T	TACAA
AID*	chrXVI	173104	1	G	A	AACGA
AID*	chrXVI	239325	1	C	T	AACCT
AID*	chrXVI	254715	1	G	A	TACTC
AID*	chrXVI	255909	1	C	T	AACAA
AID*	chrXVI	282076	1	C	T	AGCAA
AID*	chrXVI	293273	1	C	T	TGCCT
AID*	chrXVI	308528	1	C	T	TACCT
AID*	chrXVI	316726	1	C	T	AACCA
AID*	chrXVI	363912	1	C	T	AGCCA
AID*	chrXVI	378331	1	C	T	TGCCA
AID*	chrXVI	391168	1	C	T	AACTG
AID*	chrXVI	397776	1	G	A	AGCTT
AID*	chrXVI	412390	1	C	T	CACAA
AID*	chrXVI	420726	1	C	T	ACCCA
AID*	chrXVI	425184	1	G	A	AACCG
AID*	chrXVI	432499	1	G	A	CACTT
AID*	chrXVI	435942	1	C	T	TGCGC
AID*	chrXVI	449000	1	C	T	AACAG
AID*	chrXVI	453283	1	G	A	CGCAG
AID*	chrXVI	463962	1	C	T	AACCT
AID*	chrXVI	520580	1	C	T	TGCAT
AID*	chrXVI	529588	1	G	A	TGCGA
AID*	chrXVI	544426	1	G	A	AGCGC
AID*	chrXVI	544603	1	C	T	AACAA
AID*	chrXVI	546041	1	C	T	TGCAG
AID*	chrXVI	572377	1	C	T	CGCTT
AID*	chrXVI	572948	1	C	T	CTCTG
AID*	chrXVI	610391	1	C	T	AGCAA
AID*	chrXVI	622573	1	G	A	ATCTG
AID*	chrXVI	625470	1	G	A	CACTA
AID*	chrXVI	625564	1	G	A	AACTA
AID*	chrXVI	645842	1	G	A	AACAA
AID*	chrXVI	645874	1	C	T	ATCAT
AID*	chrXVI	649248	1	C	T	TGCAC
AID*	chrXVI	654137	1	C	T	AGCAA
AID*	chrXVI	658998	1	C	T	TACTT
AID*	chrXVI	678961	1	G	A	CACAT
AID*	chrXVI	700530	1	C	T	AACTT
AID*	chrXVI	704662	1	C	T	AACTT
AID*	chrXVI	740027	1	C	T	AACAC
AID*	chrXVI	821420	1	C	T	TACCA
AID*	chrXVI	821712	1	G	A	ACCTC
AID*	chrXVI	833802	1	C	T	TACTC
AID*	chrXVI	856962	1	C	T	TTCCG
AID*	chrXVI	880965	1	G	A	TACGT
AID*	chrXVI	882069	1	C	T	TACAA
AID*	chrXVI	890437	1	C	T	AACGA
AID*	chrI	19364	1	G	A	TACGT
AID*	chrI	31965	1	C	T	TTCAT
AID*	chrI	36457	1	C	T	AACTT
AID*	chrI	52680	1	G	A	TTCAA
AID*	chrI	67882	1	G	A	CACAA
AID*	chrI	77742	1	C	T	CACCC
AID*	chrI	99794	1	G	A	TTCTA
AID*	chrI	139204	1	C	T	AACAG
AID*	chrI	141494	1	G	A	AGCAC
AID*	chrI	164071	1	G	A	TTCAT
AID*	chrI	166334	1	C	T	TGCGT
AID*	chrI	171952	1	G	A	AGCTA
AID*	chrI	181249	1	C	T	AGCAA
AID*	chrII	9623	1	C	T	ATCTG
AID*	chrII	9979	1	G	A	TTCTG
AID*	chrII	36422	1	C	T	AGCGC
AID*	chrII	36429	1	C	T	GACTG
AID*	chrII	36721	1	C	T	TTCAC
AID*	chrII	45566	1	G	A	TTCTT
AID*	chrII	49364	1	C	T	TACCA
AID*	chrII	75156	1	C	T	AACAT
AID*	chrII	80806	1	C	T	AACCT
AID*	chrII	84314	1	C	T	AACAT
AID*	chrII	113633	1	G	A	AACAA
AID*	chrII	147096	1	C	T	AACAC
AID*	chrII	153918	1	G	A	AACCG
AID*	chrII	164160	1	G	A	AACCC
AID*	chrII	170582	1	C	T	TACTT
AID*	chrII	188370	1	C	T	ATCTG
AID*	chrII	193931	1	G	A	CGCTT
AID*	chrII	235837	1	G	A	TACAT
AID*	chrII	235942	1	G	A	AACAT
AID*	chrII	236410	1	C	T	AGCTT
AID*	chrII	255733	1	C	T	TACTA
AID*	chrII	255755	1	G	A	TCCGT
AID*	chrII	275475	1	G	A	TCCAC
AID*	chrII	278398	1	C	T	CGCAA
AID*	chrII	278426	1	G	A	TGCCA
AID*	chrII	278913	1	C	T	TACTT
AID*	chrII	278938	1	C	T	TACTT
AID*	chrII	278947	1	C	T	TTCAA
AID*	chrII	278965	1	C	T	ATCAA
AID*	chrII	289311	1	G	A	TTCTC
AID*	chrII	332760	1	C	T	AACAT
AID*	chrII	340798	1	G	A	TTCTT
AID*	chrII	347653	1	G	A	AACCG
AID*	chrII	347802	1	C	T	AACTC
AID*	chrII	379096	1	C	T	TGCGT
AID*	chrII	397114	1	G	A	TACGA
AID*	chrII	418339	1	G	A	CACGT
AID*	chrII	425817	1	G	A	CACTC
AID*	chrII	432526	1	C	T	TACAA
AID*	chrII	448438	1	C	T	AGCTA
AID*	chrII	454606	1	G	A	AACCA
AID*	chrII	477499	1	G	A	AGCCA
AID*	chrII	477559	1	G	A	TGCAA
AID*	chrII	477590	1	C	T	TACTT
AID*	chrII	490549	1	C	T	CGCCT
AID*	chrII	490788	1	G	A	AACAA
AID*	chrII	532285	1	C	T	ATCAG
AID*	chrII	582228	1	G	A	CACTG
AID*	chrII	614019	1	C	T	GACCT
AID*	chrII	679976	1	C	T	TACGT
AID*	chrII	681920	1	G	A	TACTT
AID*	chrII	681923	1	C	T	TACTC
AID*	chrII	706953	1	C	T	TACAG
AID*	chrII	710236	1	C	T	TGCTA
AID*	chrII	727140	1	G	A	AACTT
AID*	chrII	741282	1	G	A	AGCTA
AID*	chrII	754329	1	G	A	AACAA
AID*	chrII	773703	1	C	T	CACAA
AID*	chrII	776532	1	C	T	AACTA
AID*	chrII	805103	1	C	T	TTCTT
AID*	chrIII	35569	1	C	T	AACAA
AID*	chrIII	122422	1	G	A	TTCGT
AID*	chrIII	124824	1	G	A	TGCAC
AID*	chrIII	134689	1	G	A	TACTA
AID*	chrIII	135380	1	G	A	TTCGA
AID*	chrIII	137666	1	G	A	AACTT
AID*	chrIII	142586	1	G	A	TACTC
AID*	chrIII	147915	1	G	A	TGCAG
AID*	chrIII	165360	1	G	A	TGCTA
AID*	chrIII	168313	1	G	A	ATCCG
AID*	chrIII	178819	1	G	A	AACTG
AID*	chrIII	199483	1	G	A	TACAT
AID*	chrIII	209398	1	G	A	AACAA
AID*	chrIII	223238	1	G	A	AACCG
AID*	chrIII	252630	1	G	A	AGCAA
AID*	chrIII	267115	1	G	A	ATCTG
AID*	chrIII	295502	1	G	A	TACCA
AID*	chrIV	34084	1	G	A	AACCT
AID*	chrIV	62715	1	C	T	TACTC
AID*	chrIV	65949	1	G	A	AGCGT
AID*	chrIV	80664	1	C	T	AACTA
AID*	chrIV	83610	1	G	A	AGCCC
AID*	chrIV	85001	1	G	A	AGCGC
AID*	chrIV	117677	1	G	A	ATCTC
AID*	chrIV	126645	1	G	A	AACCT
AID*	chrIV	130553	1	G	A	AGCAA
AID*	chrIV	135057	1	G	A	AACAA
AID*	chrIV	135112	1	C	T	TGCTA
AID*	chrIV	159518	1	G	A	AGCTG
AID*	chrIV	241699	1	G	A	TGCGA
AID*	chrIV	242292	1	G	A	ACCAA
AID*	chrIV	242343	1	G	A	TACTA
AID*	chrIV	272300	1	G	A	TTCAC
AID*	chrIV	302230	1	G	A	AACAA
AID*	chrIV	308358	1	G	A	AGCTT
AID*	chrIV	334877	1	G	A	AGCAA
AID*	chrIV	356979	1	G	A	TTCAC
AID*	chrIV	357009	1	C	T	TACTA
AID*	chrIV	375300	1	G	A	AACAC
AID*	chrIV	381529	1	G	A	TACAC
AID*	chrIV	396394	1	G	A	TCCTT
AID*	chrIV	424079	1	G	A	TTCTT
AID*	chrIV	434110	1	G	A	AGCTG
AID*	chrIV	437994	1	G	A	AGCTT
AID*	chrIV	464867	1	G	A	TCCAC
AID*	chrIV	482909	1	G	A	TGCAA
AID*	chrIV	556604	1	G	A	TGCAA
AID*	chrIV	562519	1	G	A	AACTT
AID*	chrIV	563431	1	G	A	AGCAA
AID*	chrIV	571857	1	C	T	ACCAA
AID*	chrIV	592137	1	G	A	ATCTA
AID*	chrIV	593738	1	G	A	CTCCG
AID*	chrIV	620539	1	G	A	TACCA
AID*	chrIV	626075	1	G	A	ATCTC
AID*	chrIV	636433	1	G	A	AACGA
AID*	chrIV	644115	1	G	A	TGCAA
AID*	chrIV	653174	1	C	T	TACTA
AID*	chrIV	668041	1	G	A	AACGC
AID*	chrIV	690243	1	G	A	GACAT
AID*	chrIV	742992	1	G	A	AACAA
AID*	chrIV	765345	1	G	A	AACTC
AID*	chrIV	765351	1	G	A	AACAT
AID*	chrIV	769107	1	G	A	TGCCA
AID*	chrIV	790107	1	G	A	TGCTA
AID*	chrIV	794480	1	G	A	TACTA
AID*	chrIV	802778	1	G	A	CACTT
AID*	chrIV	914882	1	C	T	TACCA
AID*	chrIV	954535	1	G	A	TTCTT
AID*	chrIV	981003	1	G	A	TGCCC
AID*	chrIV	1013700	1	G	A	CGCCA
AID*	chrIV	1020420	1	G	A	AGCTA
AID*	chrIV	1022984	1	C	T	TACAT
AID*	chrIV	1058996	1	G	A	ATCTA
AID*	chrIV	1108153	1	G	A	ACCTA
AID*	chrIV	1150616	1	G	A	TACTA
AID*	chrIV	1150891	1	G	A	AGCAA
AID*	chrIV	1156046	1	G	A	TTCTT
AID*	chrIV	1156322	1	G	A	TACTT
AID*	chrIV	1161450	1	G	A	AACTA
AID*	chrIV	1181659	1	G	A	TGCAA
AID*	chrIV	1202080	1	G	A	TTCAC
AID*	chrIV	1228308	1	G	A	ATCTA
AID*	chrIV	1238864	1	C	T	TACGG
AID*	chrIV	1257750	1	G	A	TTCCG
AID*	chrIV	1269948	1	G	A	AACCA
AID*	chrIV	1278306	1	C	T	AACGG
AID*	chrIV	1292269	1	G	A	TGCAA
AID*	chrIV	1334315	1	C	T	TCCAA
AID*	chrIV	1402903	1	G	A	ATCCA
AID*	chrIV	1424015	1	C	T	AACAT
AID*	chrIV	1462775	1	C	T	TGCGA
AID*	chrIV	1469323	1	G	A	AACGG
AID*	chrIV	1483417	1	G	A	AACAT
AID*	chrIV	1493412	1	G	A	TGCTC
AID*	chrIV	1525406	1	G	A	CACCC
AID*	chrIX	20159	1	G	A	ACCTA
AID*	chrIX	22961	1	G	A	TGCTT
AID*	chrIX	139700	1	C	T	AACAA
AID*	chrIX	160301	1	G	A	AACAA
AID*	chrIX	165981	1	C	T	ATCTA
AID*	chrIX	166311	1	G	A	AACGG
AID*	chrIX	175065	1	G	A	TACTA
AID*	chrIX	197629	1	C	T	CACCG
AID*	chrIX	210683	1	G	A	AACCA
AID*	chrIX	210696	1	G	A	AGCAC
AID*	chrIX	258422	1	G	A	AACAC
AID*	chrIX	267906	1	C	T	ATCAA
AID*	chrIX	309280	1	G	A	AACAG
AID*	chrIX	312816	1	G	A	AACGC
AID*	chrIX	316709	1	C	T	TACTA
AID*	chrIX	364847	1	C	T	TGCAA
AID*	chrIX	367759	1	C	T	AGCTC
AID*	chrV	32883	1	C	T	TCCAA
AID*	chrV	33199	1	G	A	AGCAA
AID*	chrV	53280	1	G	A	CACCT
AID*	chrV	70075	1	C	T	CACCG
AID*	chrV	77984	1	G	A	AACAG
AID*	chrV	77994	1	G	A	AACAG
AID*	chrV	101771	1	C	T	CACTT
AID*	chrV	106181	1	C	T	TGCGC
AID*	chrV	117533	1	G	A	TACAT
AID*	chrV	117974	1	C	T	CGCCC
AID*	chrV	117995	1	G	A	TACAG
AID*	chrV	118056	1	G	A	AACTC
AID*	chrV	131115	1	G	A	ATCCG
AID*	chrV	144789	1	G	A	CGCAA
AID*	chrV	167635	1	G	A	TACTT
AID*	chrV	225265	1	G	A	AACTT
AID*	chrV	248261	1	G	A	AACCA
AID*	chrV	261885	1	G	A	AACAG
AID*	chrV	270237	1	C	T	AGCGT
AID*	chrV	272428	1	C	T	AACCT
AID*	chrV	281435	1	G	A	ATCAT
AID*	chrV	297804	1	G	A	AACCA
AID*	chrV	306287	1	C	T	AACAA
AID*	chrV	312071	1	G	A	CGCGC
AID*	chrV	322171	1	C	T	TCCTG
AID*	chrV	332388	1	G	A	AACGA
AID*	chrV	335959	1	G	A	TTCCC
AID*	chrV	362699	1	C	T	AACAT
AID*	chrV	366743	1	C	T	AACAA
AID*	chrV	399413	1	G	A	AACTA
AID*	chrV	409143	1	G	A	TGCAT
AID*	chrV	430925	1	G	A	ATCTT
AID*	chrV	431321	1	G	A	TACAA
AID*	chrV	431339	1	C	T	TGCGC
AID*	chrV	435578	1	G	A	TACAT
AID*	chrV	438731	1	C	T	TGCTT
AID*	chrV	439226	1	C	T	AACTT
AID*	chrV	442051	1	C	T	TTCCT
AID*	chrV	490891	1	C	T	AGCCA
AID*	chrV	492383	1	C	T	TTCTG
AID*	chrV	543370	1	G	A	AACTT
AID*	chrV	545520	1	G	A	TGCAG
AID*	chrVI	130162	1	C	T	ACCCA
AID*	chrVI	130165	1	C	T	CACTA
AID*	chrVI	156157	1	C	T	AACCA
AID*	chrVI	203072	1	C	T	AGCAC
AID*	chrVI	224913	1	C	T	AACCC
AID*	chrVI	226735	1	C	T	TACGC
AID*	chrVI	226891	1	C	T	ATCTA
AID*	chrVI	233915	1	C	T	AACCA
AID*	chrVII	45272	1	C	T	TTCAG
AID*	chrVII	46059	1	C	T	AGCTC
AID*	chrVII	60221	1	G	A	TACCT
AID*	chrVII	115541	1	C	T	AGCAA
AID*	chrVII	131267	1	C	T	TACAC
AID*	chrVII	131269	1	C	T	CACAG
AID*	chrVII	149004	1	C	T	AACAA
AID*	chrVII	149038	1	C	T	ATCTA
AID*	chrVII	149127	1	C	T	TACTG
AID*	chrVII	166505	1	G	A	ATCTT
AID*	chrVII	193526	1	C	T	TACGA
AID*	chrVII	214730	1	C	T	CTCAG
AID*	chrVII	228199	1	G	A	TACCT
AID*	chrVII	249804	1	C	T	AGCTG
AID*	chrVII	250348	1	G	A	TTCGA
AID*	chrVII	250852	1	G	A	TACCT
AID*	chrVII	254533	1	C	T	AGCAT
AID*	chrVII	263754	1	G	A	AGCAA
AID*	chrVII	272337	1	C	T	TACGT
AID*	chrVII	306358	1	C	T	ACCCT
AID*	chrVII	310899	1	G	A	AACGG
AID*	chrVII	310912	1	C	T	TCCTT
AID*	chrVII	324535	1	C	T	AACAT
AID*	chrVII	366691	1	G	A	TTCTT
AID*	chrVII	401561	1	G	A	CACCG
[truncated: 84,125 more rows]
