# Supplementary material for: Active RNAP pre-initiation sites are highly mutated by cytidine deaminases in yeast, with AID targeting small RNA genes
Source: eLife journal article supplement (doi:10.7554/elife.03553), 2014-09-18
Supplement: supp [file elife-03553-supp-v1.zip › elife_poa_e03553_Supplementary_File_2.txt]

mutator	chromosome	start	end	number_mutations	number_samples_with_mutation_in_region	associated_gene	associated_feature
A3G	chrI	35042	35057	13	10	YAL060W	promoter
A3G	chrI	45711	45775	18	16	YAL053W	promoter
A3G	chrI	58657	58657	6	6	YAL044C	promoter
A3G	chrI	71601	71750	28	20	YAL038W	promoter
A3G	chrI	72469	72708	8	7	YAL038W	ORF
A3G	chrI	139152	139244	9	9	YBR083W	tRNA
A3G	chrI	141539	141564	30	26	YAL005C	promoter
A3G	chrI	181191	181271	6	6	YBL014C	tRNA
A3G	chrI	190045	190177	24	18	YAR035W	promoter
A3G	chrII	28204	28361	7	7	YBL101C	ORF
A3G	chrII	36400	36556	8	8	YBR059C	tRNA
A3G	chrII	45068	45068	12	12	YBL092W	promoter
A3G	chrII	88003	88023	22	20	YBL075C-YBL074C	promoter
A3G	chrII	135721	135750	7	7	YBL045C	promoter
A3G	chrII	168246	168335	6	6	YBL027W	promoter
A3G	chrII	235905	235976	6	6	YBL002W	promoter
A3G	chrII	236361	236456	6	6	YBL002W	ORF
A3G	chrII	255755	255849	9	9	YBR010W	promoter
A3G	chrII	256139	256261	9	9	YBR010W	promoter
A3G	chrII	278292	278433	33	26	YBR020W	promoter
A3G	chrII	292047	292068	16	12	YBR025C	promoter
A3G	chrII	297791	298002	11	10	YBR030W	promoter
A3G	chrII	342607	342728	7	6	YBR054W	promoter
A3G	chrII	347606	347763	10	10	YBL023C	tRNA
A3G	chrII	380813	380813	6	6	YBR071W	ORF
A3G	chrII	391490	391573	7	5	YBR076W	transcript
A3G	chrII	392792	392924	7	7	YBR078W	promoter
A3G	chrII	431926	432068	7	6	YBR094W	promoter
A3G	chrII	452051	452074	9	9	YBR105C	promoter
A3G	chrII	477424	477673	38	22	YBR118W	promoter
A3G	chrII	490516	490655	7	5	YBR126C	promoter
A3G	chrII	501651	501651	6	6	YBR132C	promoter
A3G	chrII	555592	555596	16	15	YBR157C	promoter
A3G	chrII	582356	582356	9	9	YBR175W	promoter
A3G	chrII	614057	614082	19	13	YBR196C	promoter
A3G	chrII	615276	615359	10	9	YBR197C	ORF
A3G	chrII	662470	662484	11	10	YBR218C	promoter
A3G	chrII	670273	670378	6	6	YBR224W-YBR225W	promoter
A3G	chrII	681864	681925	10	9	YBR231C	transcript
A3G	chrII	718117	718251	10	10	YBR250W	promoter
A3G	chrII	721206	721206	10	10	YBR251W	promoter
A3G	chrII	800447	800502	9	9	YBR297W	promoter
A3G	chrIII	50767	50781	43	25	YCL042W-YCL040W	promoter
A3G	chrIII	105559	105722	8	8	YCL009C	promoter
A3G	chrIII	122400	122428	14	12	YCR005C	promoter
A3G	chrIII	123496	123698	29	21	YBR072W	tRNA
A3G	chrIII	126972	126972	6	6	YCR007C	ORF
A3G	chrIII	163243	163319	24	18	YCR025C	transcript
A3G	chrIII	190507	190507	16	16	YCR034W	promoter
A3G	chrIV	42002	42036	6	6	YDL231C	ORF
A3G	chrIV	116211	116211	8	8	YDL192W	promoter
A3G	chrIV	125155	125217	18	15	YDL188C	promoter
A3G	chrIV	155984	155987	6	6	YDL170W	promoter
A3G	chrIV	217514	217550	7	6	YDL136W	promoter
A3G	chrIV	221272	221324	6	6	YDL134C	promoter
A3G	chrIV	221830	221924	18	13	YDL133W	promoter
A3G	chrIV	229061	229143	8	7	YDL130W-A	promoter
A3G	chrIV	229789	229838	8	8	YDL130W	promoter
A3G	chrIV	267680	267866	7	6	YDL108W	promoter
A3G	chrIV	285138	285226	6	6	YDL098C	promoter
A3G	chrIV	300104	300123	10	9	YDL088C	promoter
A3G	chrIV	301943	302189	6	6	YDL086W	ORF
A3G	chrIV	303140	303140	9	9	YDL085W	promoter
A3G	chrIV	330525	330551	6	6	YDL070W	promoter
A3G	chrIV	334455	334921	27	17	YDL066W	promoter
A3G	chrIV	341264	341324	28	24	YDL060W	promoter
A3G	chrIV	363646	363648	7	7	YDL051W	promoter
A3G	chrIV	368308	368335	7	6	YDL048C	promoter
A3G	chrIV	373780	373804	17	14	YDL045C	promoter
A3G	chrIV	413419	413443	6	6	Unit126	transcript
A3G	chrIV	416961	416976	41	29	YDL020C	promoter
A3G	chrIV	422075	422185	6	4	YDL019C	promoter
A3G	chrIV	442290	442421	6	6	YDL005C	promoter
A3G	chrIV	444231	444240	19	16	YDL003W	promoter
A3G	chrIV	471730	471859	11	9	YDR012W	promoter
A3G	chrIV	488809	488942	7	7	YBR162C	tRNA
A3G	chrIV	507788	507845	37	27	YDR033W	promoter
A3G	chrIV	543563	543593	12	11	YDR043C	promoter
A3G	chrIV	550584	550712	6	6	YDR046C	promoter
A3G	chrIV	556586	556587	14	13	YDR050C	promoter
A3G	chrIV	562247	562248	7	7	YDR054C	ORF
A3G	chrIV	568910	569025	7	7	YAL014C	tRNA
A3G	chrIV	592219	592432	8	8	YDR073W	promoter
A3G	chrIV	619866	620002	7	6	YAL034C	tRNA
A3G	chrIV	621849	621941	15	15	YDR089W	promoter
A3G	chrIV	637279	637279	8	8	YDR096W	ORF
A3G	chrIV	645087	645184	10	10	YBL091C	tRNA
A3G	chrIV	652549	652667	7	7	YDR099W	promoter
A3G	chrIV	704152	704193	24	20	YDR127W	promoter
A3G	chrIV	715614	715614	10	10	YDR129C	promoter
A3G	chrIV	721578	721587	7	7	intergenic	intergenic
A3G	chrIV	769083	769113	7	6	YDR156W-YDR157W	promoter
A3G	chrIV	812032	812167	16	15	YDR174W	promoter
A3G	chrIV	817681	817861	10	10	YDR178W	promoter
A3G	chrIV	835475	835759	11	9	YDR186C	promoter
A3G	chrIV	842715	842715	9	9	YDR191W	ORF
A3G	chrIV	884407	884531	7	7	YBL032W	tRNA
A3G	chrIV	914789	915113	17	14	YDR225W	promoter
A3G	chrIV	915394	915407	11	9	YDR225W	promoter
A3G	chrIV	930521	930644	23	21	YDR234W	promoter
A3G	chrIV	964848	964848	9	9	YDR254W	promoter
A3G	chrIV	979222	979321	6	6	YDR261C	promoter
A3G	chrIV	1013740	1013753	46	31	YDR276C	promoter
A3G	chrIV	1056416	1056471	15	13	YDR297W	promoter
A3G	chrIV	1112501	1112516	12	11	YDR322C-A	promoter
A3G	chrIV	1135728	1135736	8	6	YDR334W	promoter
A3G	chrIV	1150870	1151017	7	7	YBR125C	tRNA
A3G	chrIV	1153711	1153909	10	8	YDR341C	promoter
A3G	chrIV	1156812	1156919	7	7	XUT	XUT
A3G	chrIV	1161432	1161432	6	6	intergenic	intergenic
A3G	chrIV	1162500	1162644	8	8	XUT	XUT
A3G	chrIV	1168760	1168903	10	9	YDR347W	promoter
A3G	chrIV	1184250	1184374	7	6	YDR354W	promoter
A3G	chrIV	1195241	1195241	6	6	YDR359C	promoter
A3G	chrIV	1222430	1222499	23	20	YDR373W	promoter
A3G	chrIV	1228404	1228557	8	7	YDR377W	promoter
A3G	chrIV	1251891	1252093	7	6	YDR389W	promoter
A3G	chrIV	1257018	1257044	13	13	YBL064C	tRNA
A3G	chrIV	1269853	1269986	13	11	YDR399W	promoter
A3G	chrIV	1301566	1301567	22	20	YDR418W	promoter
A3G	chrIV	1303200	1303218	8	7	YDR419W	promoter
A3G	chrIV	1445575	1445591	23	22	YDR497C	promoter
A3G	chrIV	1468435	1468643	8	8	YDR508C	promoter
A3G	chrIV	1489851	1489907	11	8	YDR525W	transcript
A3G	chrV	32272	32272	18	18	YEL063C	ORF
A3G	chrV	32488	32841	32	26	YEL063C	ORF
A3G	chrV	33024	33111	23	20	YEL063C	ORF
A3G	chrV	68937	69024	10	10	YEL044W	promoter
A3G	chrV	85547	85570	37	27	YEL034W	transcript
A3G	chrV	101743	101808	10	9	YEL026W	promoter
A3G	chrV	117792	118066	53	31		ncRNA
A3G	chrV	123000	123131	22	18	YEL017W	promoter
A3G	chrV	140389	140440	15	12	YEL009C	promoter
A3G	chrV	141579	141591	14	11	YEL007W	promoter
A3G	chrV	195040	195074	7	7	YER020W	promoter
A3G	chrV	196862	196862	31	31	YER021W	promoter
A3G	chrV	208539	208628	9	8	YER026C	promoter
A3G	chrV	238341	238395	6	6	YER044C	promoter
A3G	chrV	265831	265951	8	8	YER055C	promoter
A3G	chrV	294848	294928	9	9	YER069W	promoter
A3G	chrV	295293	295334	19	15	YER069W	promoter
A3G	chrV	322171	322179	9	9	SRG1-YER081W	promoter
A3G	chrV	327090	327223	6	6	YER083C	promoter
A3G	chrV	335376	335388	15	12	YER088C	promoter
A3G	chrV	335834	336013	9	8	YER088C-A-YER089C	ORF
A3G	chrV	342816	342817	14	12	YER092W	promoter
A3G	chrV	362695	362695	6	6	YER102W	promoter
A3G	chrV	409134	409183	7	7	YER125W	promoter
A3G	chrV	423448	423483	17	16	YER131W	promoter
A3G	chrV	431187	431358	9	9	YAL032C	snoRNA
A3G	chrV	441936	442376	41	26	YER137C	promoter
A3G	chrV	442533	442614	29	25	ARS519	ARS
A3G	chrV	468196	468225	7	5	YER150W	promoter
A3G	chrV	492357	492412	6	6	YAL033W	tRNA
A3G	chrV	548134	548230	6	6	YER178W	ORF
A3G	chrVI	16515	16724	11	10	YFL055W	promoter
A3G	chrVI	54832	55068	35	22	YFL039C	promoter
A3G	chrVI	64925	65044	7	6	YFL034W	promoter
A3G	chrVI	101409	101456	9	8	YBR074W	tRNA
A3G	chrVI	104379	104519	7	6	YFL017C	promoter
A3G	chrVI	118675	118874	7	6	CUT575	CUT
A3G	chrVI	131603	131603	6	6	YFL004W	promoter
A3G	chrVI	156090	156184	6	6	YFR006W	promoter
A3G	chrVI	191468	191582	7	5	YBR098W	tRNA
A3G	chrVI	196299	196512	10	9	YFR022W	promoter
A3G	chrVI	204851	204958	8	7	YAL062W	tRNA
A3G	chrVI	213233	213234	27	26	YFR030W	promoter
A3G	chrVI	224900	224915	14	12	YFR033C	promoter
A3G	chrVI	248307	248307	6	6	YFR049W	promoter
A3G	chrVI	255201	255333	9	8	YFR052C-A-YFR053C	promoter
A3G	chrVI	263781	263882	7	7	YFR055W	promoter
A3G	chrVII	56400	56403	9	9	YGL234W	promoter
A3G	chrVII	79218	79231	11	8	YGL224C	promoter
A3G	chrVII	122240	122410	7	7	YBR001C	tRNA
A3G	chrVII	156689	156727	7	5	YGL184C	promoter
A3G	chrVII	165208	165209	7	7	YGL179C	promoter
A3G	chrVII	244956	244958	34	30	YGL139W	promoter
A3G	chrVII	249815	249877	6	6	YGL137W	promoter
A3G	chrVII	272283	272440	7	7	YGL125W	promoter
A3G	chrVII	277412	277518	14	10	YGL123W	promoter
A3G	chrVII	288062	288155	6	6	YGL117W	promoter
A3G	chrVII	310868	311027	23	20	YGL103W	promoter
A3G	chrVII	319829	319976	11	9	YBL051C	tRNA
A3G	chrVII	325927	326056	7	7	YGL096W	ORF
A3G	chrVII	377675	377692	6	5	YGL066W	ORF
A3G	chrVII	384390	384565	7	4	YGL063W	ORF
A3G	chrVII	392140	392188	12	11	YGL059W	promoter
A3G	chrVII	401549	401560	6	5	YAR042W	tRNA
A3G	chrVII	413661	413996	11	8	YGL045W	promoter
A3G	chrVII	433923	433989	6	6	XUT	XUT
A3G	chrVII	438926	438983	12	12	YGL030W	promoter
A3G	chrVII	482953	482964	12	12	YGL008C	promoter
A3G	chrVII	483889	484070	17	14	XUT	XUT
A3G	chrVII	484289	484399	6	5	XUT	XUT
A3G	chrVII	508760	508760	6	6	YGR008C	promoter
A3G	chrVII	524655	524655	7	7	YGR017W	ORF
A3G	chrVII	547794	547794	6	6	YGR032W	promoter
A3G	chrVII	560088	560088	6	6	YGR038W	promoter
A3G	chrVII	601402	601589	7	7	YGR056W	promoter
A3G	chrVII	610438	610439	6	6	YGR060W	promoter
A3G	chrVII	648892	648989	7	7	YGR085C	promoter
A3G	chrVII	650588	650774	55	30	YGR086C	promoter
A3G	chrVII	661871	661875	7	7	YGR090W	promoter
A3G	chrVII	703366	703366	15	15	YGR108W	promoter
A3G	chrVII	733470	733548	6	4	YGR122W	promoter
A3G	chrVII	739805	739902	7	6	YGR124W	promoter
A3G	chrVII	754305	754321	18	16	YGR131W	promoter
A3G	chrVII	785199	785549	21	18	YGR146C	promoter
A3G	chrVII	794406	794514	7	6	YAL048C	tRNA
A3G	chrVII	807761	807770	10	10	YGR159C	promoter
A3G	chrVII	823887	823972	8	8	YGR162W	promoter
A3G	chrVII	851374	851451	6	5	YGR178C	ORF
A3G	chrVII	860218	860218	11	11	YGR184C	ORF
A3G	chrVII	866162	866162	9	9	YGR184C	promoter
A3G	chrVII	878759	878770	11	10	YBR128C	tRNA
A3G	chrVII	887651	887651	6	6	YGR194C	ORF
A3G	chrVII	904729	904937	11	9	YGR203W	promoter
A3G	chrVII	910411	910499	6	6	YGR206W	promoter
A3G	chrVII	958750	958880	10	9	YGR233C	promoter
A3G	chrVII	973998	974107	15	13	YGR240C	promoter
A3G	chrVII	976763	976843	8	8	YGR243W	promoter
A3G	chrVII	977093	977241	14	12	YGR243W	promoter
A3G	chrVII	1000734	1000969	7	7	YGR254W	promoter
A3G	chrVII	1012104	1012219	7	7	YGR260W	promoter
A3G	chrVII	1022566	1022690	6	4	YGR266W	promoter
A3G	chrVII	1026691	1026691	8	8	YGR268C	promoter
A3G	chrVII	1065459	1065525	6	5	YGR286C	promoter
A3G	chrVIII	5024	5202	14	13	TEL08L	telomere
A3G	chrVIII	65918	65942	7	6	YHL021C	promoter
A3G	chrVIII	102033	102285	7	6	YHL002W	promoter
A3G	chrVIII	117756	117791	9	9	YHR006W	promoter
A3G	chrVIII	121672	121969	26	17	YHR007C	promoter
A3G	chrVIII	143642	143642	7	7	YHR020W	promoter
A3G	chrVIII	146436	146562	6	5	YHRWtau3	other
A3G	chrVIII	149186	149186	7	7	YHR021W-A	promoter
A3G	chrVIII	151290	151515	16	14	YHR023W	promoter
A3G	chrVIII	218775	218890	6	5	YHR057C	promoter
A3G	chrVIII	271756	271756	10	10	YHR082C	ORF
A3G	chrVIII	298721	298786	12	12	YHR097C	promoter
A3G	chrVIII	352447	352645	7	7	YHR121W	promoter
A3G	chrVIII	361976	362017	12	9	YHR128W	promoter
A3G	chrVIII	375588	375731	17	16	YHR137W	promoter
A3G	chrVIII	377767	377767	10	10	YHR138C	promoter
A3G	chrVIII	388903	388962	9	8	YBR084W	tRNA
A3G	chrVIII	400992	401025	8	8	YHR152W	promoter
A3G	chrVIII	450575	450740	10	10	YHR172W	ORF
A3G	chrVIII	451237	451238	16	15	YHR174W	promoter
A3G	chrVIII	490545	490568	14	12	YHR195W	promoter
A3G	chrVIII	522184	522237	13	10	YHR210C	promoter
A3G	chrVIII	554133	554238	22	19	intergenic	intergenic
A3G	chrIX	96811	96815	19	18	YIL135C	promoter
A3G	chrIX	122278	122441	15	13	YIL125W	promoter
A3G	chrIX	165996	166005	6	6	YIL106W	promoter
A3G	chrIX	231019	231248	8	7	YIL070C	promoter
A3G	chrIX	245697	245767	7	7	YIL061C	promoter
A3G	chrIX	248894	249033	6	4	YBR103W	tRNA
A3G	chrIX	249599	249815	19	15	YIL056W	promoter
A3G	chrIX	255038	255038	8	8	YIL053W	promoter
A3G	chrIX	267786	268095	17	12	YIL046W	promoter
A3G	chrIX	268276	268434	13	11	YIL046W	promoter
A3G	chrIX	311019	311098	6	6	YIL022W	promoter
A3G	chrIX	316566	316770	7	4	YIL018W	promoter
A3G	chrIX	370826	370838	11	9	YIR007W	promoter
A3G	chrX	73709	73867	10	10	YJL191W	promoter
A3G	chrX	90574	90716	11	10	YJL177W	promoter
A3G	chrX	97214	97215	13	12	YJL172W	promoter
A3G	chrX	97678	97678	7	7	YJL172W	promoter
A3G	chrX	133960	134088	6	5	YJL154C	promoter
A3G	chrX	136007	136008	30	26	YJL153C	promoter
A3G	chrX	140060	140193	7	5	YJL148W	promoter
A3G	chrX	154772	154772	6	6	YJL138C	promoter
A3G	chrX	172949	173095	51	30	YJL130C	promoter
A3G	chrX	173548	173755	8	7	YJL129C	ORF
A3G	chrX	187827	187913	7	7	YJL124C	promoter
A3G	chrX	205035	205144	10	10	YJL112W	promoter
A3G	chrX	268215	268367	17	12	YJL088W	promoter
A3G	chrX	374493	374649	6	5	YAL007C	tRNA
A3G	chrX	392255	392396	19	15	YJL026W	promoter
A3G	chrX	449145	449145	8	8	YJR006W	promoter
A3G	chrX	452224	452397	11	11	YJR008W	promoter
A3G	chrX	466446	466637	7	7	YJR016C	promoter
A3G	chrX	468320	468484	8	8	YJR019C	promoter
A3G	chrX	468672	468686	6	6	YJR019C	promoter
A3G	chrX	510303	510304	21	19	YJR041C	ORF
A3G	chrX	521770	521780	40	31	YJR046W	promoter
A3G	chrX	617904	618121	8	8	YBL018C	tRNA
A3G	chrX	620546	620609	12	11	YJR103W	promoter
A3G	chrX	639553	639553	6	6	YJR115W-YJR116W	ORF
A3G	chrX	667222	667222	6	6	YJR131W	promoter
A3G	chrX	683398	683410	37	28	YJR137C	promoter
A3G	chrX	705586	705662	7	7	YJR148W	promoter
A3G	chrX	725534	725534	9	9	Unit382	transcript
A3G	chrXI	21994	22159	8	8	YKL217W	promoter
A3G	chrXI	34105	34186	7	7	YKL212W	promoter
A3G	chrXI	39688	39689	6	5	YKL210W	ORF
A3G	chrXI	46932	47023	16	16	YKL208W	promoter
A3G	chrXI	92618	92722	6	5	YKL186C	ORF
A3G	chrXI	100112	100112	21	21	YKL182W	promoter
A3G	chrXI	100314	100315	6	6	YKL182W	promoter
A3G	chrXI	127350	127387	6	5	YKL171W	promoter
A3G	chrXI	164451	164532	6	5	YKL150W	promoter
A3G	chrXI	179604	179606	23	20	YKL141W	promoter
A3G	chrXI	213055	213055	12	12	YKL122C	promoter
A3G	chrXI	224724	224856	8	5	YKL115C-YKL114C	promoter
A3G	chrXI	231884	231962	8	7	YKL109W	promoter
A3G	chrXI	259170	259177	19	16	YKL096W-A	promoter
A3G	chrXI	261058	261120	6	4	YKL096W	promoter
A3G	chrXI	302912	302974	17	16	YBR130C	tRNA
A3G	chrXI	313422	313424	6	5	YBL047C	tRNA
A3G	chrXI	317120	317263	6	5	YKL064W	promoter
A3G	chrXI	327543	327631	11	10	YKL060C	promoter
A3G	chrXI	334966	335028	16	15	YKL056C	promoter
A3G	chrXI	338848	338976	8	7	YKL054C	promoter
A3G	chrXI	341067	341224	12	11	YKL052C	promoter
A3G	chrXI	356425	356440	7	6	YKL044W	ORF
A3G	chrXI	369670	369787	6	6	YKL035W	promoter
A3G	chrXI	374350	374411	8	8	YKL033W-A	promoter
A3G	chrXI	384806	384940	7	6	YKL029C	promoter
A3G	chrXI	385420	385529	6	5	YKL028W	promoter
A3G	chrXI	559404	559410	13	11	YKR062W	promoter
A3G	chrXI	565952	565952	6	6	YKR065C	promoter
A3G	chrXI	578982	579143	7	7	YBR014C	tRNA
A3G	chrXI	589599	589604	10	8	YKR079C	promoter
A3G	chrXI	618785	618886	13	11	YKR094C	promoter
A3G	chrXI	631914	631931	6	6	YKR097W	promoter
A3G	chrXII	17501	17547	10	10	YLL061W	promoter
A3G	chrXII	65328	65499	6	5	YLL039C	promoter
A3G	chrXII	108153	108278	6	6	YLL020C-YLL019C-	ORF
A3G	chrXII	109192	109192	14	14	YLL020C-YLL019C-	promoter
A3G	chrXII	187256	187355	7	7	YLR023C	promoter
A3G	chrXII	188079	188089	7	6	YLR024C	ORF
A3G	chrXII	194315	194371	8	8	YLR025W	promoter
A3G	chrXII	198705	198822	38	31	YAL015C	snoRNA
A3G	chrXII	202588	202705	10	9	YLR029C	promoter
A3G	chrXII	214374	214499	6	6	YLR035C	promoter
A3G	chrXII	234064	234198	27	22	YLR044C	promoter
A3G	chrXII	235299	235406	6	5	YLR045C	ORF
A3G	chrXII	247119	247153	6	6	YLR052W	promoter
A3G	chrXII	265395	265467	7	7	YLR064W	promoter
A3G	chrXII	290105	290121	8	7	YLR081W	promoter
A3G	chrXII	320259	320514	17	15	YLR090W	promoter
A3G	chrXII	323363	323466	12	10	YLR092W	promoter
A3G	chrXII	348672	348672	12	12	YLR105C	promoter
A3G	chrXII	366273	366311	17	14	YAL058W	snRNA
A3G	chrXII	370191	370191	17	17	YLR110C	promoter
A3G	chrXII	403750	404209	13	10	YLR130C	promoter
A3G	chrXII	424698	424768	12	11	YLR142W	promoter
A3G	chrXII	440265	440337	11	10	YLR150W	promoter
A3G	chrXII	444771	444868	19	18	YLR152C	promoter
A3G	chrXII	489408	489435	6	6	RDN5-6	rRNA
A3G	chrXII	498829	498855	7	6	YLR167W	promoter
A3G	chrXII	500512	500615	6	6	YLR168C	promoter
A3G	chrXII	522587	522587	11	11	YLR185W	promoter
A3G	chrXII	551656	551737	8	6	YLR203C	ORF
A3G	chrXII	568350	568350	11	11	YLR214W	promoter
A3G	chrXII	586389	586389	6	6	YLR224W	ORF
A3G	chrXII	589005	589005	12	12	YLR226W	promoter
A3G	chrXII	605310	605380	7	6	YBL031W	tRNA
A3G	chrXII	636664	636718	13	11	YLR249W	promoter
A3G	chrXII	646081	646081	7	7	intergenic	intergenic
A3G	chrXII	669126	669158	10	7	YLR261C-YLR262C	promoter
A3G	chrXII	673070	673146	10	9	YLR264W	promoter
A3G	chrXII	677689	677796	6	5	YLR267W	promoter
A3G	chrXII	710414	710414	7	7	YLR285C-YLR286C	other
A3G	chrXII	728730	728810	33	23	YLR300W	promoter
A3G	chrXII	737628	737654	16	13	YLR304C	promoter
A3G	chrXII	758975	759108	12	12	YLR312W-A	promoter
A3G	chrXII	784265	784760	19	13	YBR126C	tRNA
A3G	chrXII	795248	795248	16	16	intergenic	intergenic
A3G	chrXII	818625	818671	7	7	YAL028W	tRNA
A3G	chrXII	830749	830889	8	7	YLR352W	promoter
A3G	chrXII	839361	839372	29	22	YLR355C	promoter
A3G	chrXII	855790	855795	9	8	intergenic	intergenic
A3G	chrXII	903209	903405	9	8	YLR390W-A	promoter
A3G	chrXII	921679	921693	7	7	YLR399C	promoter
A3G	chrXII	924875	924884	6	6	YLR401C	promoter
A3G	chrXII	931790	931942	8	7	YLR406C	promoter
A3G	chrXII	962898	963010	9	9	YBL020W	tRNA
A3G	chrXII	1002283	1002361	52	28	YLR432W	promoter
A3G	chrXII	1014495	1014515	9	8	YLR439W	promoter
A3G	chrXII	1043550	1043662	7	7	YLR454W	promoter
A3G	chrXIII	17019	17071	15	14	YML127W	promoter
A3G	chrXIII	20687	20687	12	12	YML126C	promoter
A3G	chrXIII	56448	56575	22	21	YML106W	promoter
A3G	chrXIII	119460	119460	6	6	YML075C	promoter
A3G	chrXIII	129583	129591	6	6	YML072C	promoter
A3G	chrXIII	159298	159413	15	14	YML058W	promoter
A3G	chrXIII	171541	171596	12	11	YML051W	promoter
A3G	chrXIII	178545	178629	6	6	YML048W	promoter
A3G	chrXIII	196078	196137	12	9	YBR084C-A	tRNA
A3G	chrXIII	214054	214205	6	5	YML031W	promoter
A3G	chrXIII	347504	347646	6	5	YMR038C	ORF
A3G	chrXIII	348412	348488	6	5	YMR038C	promoter
A3G	chrXIII	349767	349881	9	8	YMR040W	promoter
A3G	chrXIII	353407	353438	7	6	YMR043W	promoter
A3G	chrXIII	362990	363165	6	6	YBL046W	tRNA
A3G	chrXIII	379352	379363	8	8	YBR131W	tRNA
A3G	chrXIII	396440	396440	24	24	YMR062C	promoter
A3G	chrXIII	431428	431526	10	8	YMR081C	promoter
A3G	chrXIII	434004	434227	14	10	YMR083W	promoter
A3G	chrXIII	439565	439706	14	13	YMR086W	ORF
A3G	chrXIII	447892	447892	20	20	YMR089C	ORF
A3G	chrXIII	472741	472741	11	11	YMR102C	promoter
A3G	chrXIII	475492	475642	9	6	YMR104C	transcript
A3G	chrXIII	483851	483879	7	6	YMR108W	promoter
A3G	chrXIII	500766	500833	16	16	YMR116C-snR24	promoter
A3G	chrXIII	534778	534905	7	7	YMR131C	promoter
A3G	chrXIII	540986	541182	11	9	YMR136W	promoter
A3G	chrXIII	652224	652300	10	9	YAR003W	snoRNA
A3G	chrXIII	675571	675668	8	7	YMR206W	promoter
A3G	chrXIII	688989	689035	9	9	YMR211W	promoter
A3G	chrXIII	697202	697408	8	6	YMR215W	ORF
A3G	chrXIII	746202	746202	7	7	YMR238W	promoter
A3G	chrXIII	759339	759509	32	21	YMR246W	promoter
A3G	chrXIII	774673	774673	6	6	YMR251W-A	promoter
A3G	chrXIII	808146	808269	7	6	YBL095W	tRNA
A3G	chrXIII	914745	914745	7	7	YMR319C	promoter
A3G	chrXIV	23184	23253	8	6	YNL329C-YNL328C	ORF
A3G	chrXIV	62994	63088	7	7	YNL302C	promoter
A3G	chrXIV	80465	80465	10	10	YNL293W	promoter
A3G	chrXIV	96182	96312	6	5	YBL059W	tRNA
A3G	chrXIV	117092	117281	9	8	YNL277W	promoter
A3G	chrXIV	117436	117499	6	6	YNL277W	promoter
A3G	chrXIV	135688	135688	6	6	YNL271C	promoter
A3G	chrXIV	154765	154781	9	9	YNL261W	promoter
A3G	chrXIV	167828	167865	8	7	YNL255C	promoter
A3G	chrXIV	170222	170222	10	10	YNL253W	ORF
A3G	chrXIV	174626	174673	57	35	YNL251C	promoter
A3G	chrXIV	197892	198166	15	11	YNL241C	promoter
A3G	chrXIV	200007	200036	6	6	YNL239W	promoter
A3G	chrXIV	200356	200508	8	8	YNL239W	promoter
A3G	chrXIV	241554	241561	7	6	YNL216W	promoter
A3G	chrXIV	251900	252035	6	6	YNL209W	promoter
A3G	chrXIV	255187	255299	6	6	YNL207W	promoter
A3G	chrXIV	289222	289310	10	8	YNL186W	promoter
A3G	chrXIV	300705	300815	6	5	YNL180C	transcript
A3G	chrXIV	309815	309821	6	6	YNL173C	ORF
A3G	chrXIV	342179	342196	8	7	YNL155W	promoter
A3G	chrXIV	374871	375121	13	11	YBR069C	tRNA
A3G	chrXIV	407851	407851	9	9	YNL116W	promoter
A3G	chrXIV	408251	408376	6	6	YNL116W	promoter
A3G	chrXIV	415220	415264	6	5	YNL112W	ORF
A3G	chrXIV	426913	426994	31	19	YNL104C	ORF
A3G	chrXIV	440706	440828	6	6	YNL097C-B	ORF
A3G	chrXIV	488280	488347	14	14	YNL073W	promoter
A3G	chrXIV	495050	495195	6	5	YNL069C	promoter
A3G	chrXIV	499575	499601	29	22	YNL067W	promoter
A3G	chrXIV	559152	559309	14	13	YNL036W	promoter
A3G	chrXIV	559622	559725	10	10	YNL036W	promoter
A3G	chrXIV	568148	568308	9	8	YBR080C	tRNA
A3G	chrXIV	576097	576132	26	21	YNL031C	promoter
A3G	chrXIV	587763	587982	9	8	YNL024C	promoter
A3G	chrXIV	613349	613542	10	9	YNL010W	promoter
A3G	chrXIV	627383	627400	12	11	YNL001W	promoter
A3G	chrXIV	631191	631304	18	15	YNR001C	promoter
A3G	chrXIV	631541	631878	13	11	YBR073W	tRNA
A3G	chrXIV	664177	664177	9	9	YNR018W	promoter
A3G	chrXIV	685820	685896	6	5	YNR032W	promoter
A3G	chrXIV	691786	691800	6	6	Unit528	transcript
A3G	chrXV	28405	28405	7	7	XUT	XUT
A3G	chrXV	39710	39717	8	6	XUT	XUT
A3G	chrXV	55340	55341	7	7	YOL142W	promoter
A3G	chrXV	61129	61129	6	6	YOL139C	promoter
A3G	chrXV	73978	74068	8	8	YOL130W	promoter
A3G	chrXV	87433	87451	19	17	YOL123W	promoter
A3G	chrXV	92911	92932	7	6	YOL121C	promoter
A3G	chrXV	96614	96702	19	15	YOL119C	promoter
A3G	chrXV	110154	110164	11	11	YOL109W	promoter
A3G	chrXV	117631	117678	6	6	YOL104C	transcript
A3G	chrXV	143031	143094	12	11	YOL094C	promoter
A3G	chrXV	160623	160687	20	14	YOL086C	promoter
A3G	chrXV	163277	163408	13	11	YOL084W	ORF
A3G	chrXV	185220	185365	10	10	YOL077W-A	promoter
A3G	chrXV	205826	205826	7	7	YOL065C	promoter
A3G	chrXV	212048	212211	7	7	YOL061W	promoter
A3G	chrXV	217009	217115	12	11	YOL059W	promoter
A3G	chrXV	219431	219431	10	10	YOL058W	ORF
A3G	chrXV	231836	231836	6	6	YOL052C-A	promoter
A3G	chrXV	253634	253692	15	13	YOL039W	promoter
A3G	chrXV	254196	254211	7	7	YOL039W	promoter
A3G	chrXV	267925	267938	6	4	YOL030W	promoter
A3G	chrXV	285894	286121	8	8	YOL020W	promoter
A3G	chrXV	301130	301188	10	9	YBR081C	tRNA
A3G	chrXV	303359	303359	7	7	YOL013C	promoter
A3G	chrXV	361162	361241	7	6	YOR017W	promoter
A3G	chrXV	364310	364495	6	5	YOR018W	promoter
A3G	chrXV	380934	381008	11	10	YOR027W	promoter
A3G	chrXV	408134	408179	24	23	YAR002C-A	snoRNA
A3G	chrXV	431513	431575	6	5	YOR056C	promoter
A3G	chrXV	438683	438795	7	7	YBR016W	tRNA
A3G	chrXV	444570	444611	7	7	YOR063W	promoter
A3G	chrXV	447066	447115	7	7	YOR065W	promoter
A3G	chrXV	462941	462941	7	7	CUT379	CUT
A3G	chrXV	494675	494934	14	13	YOR092W	promoter
A3G	chrXV	502668	502668	8	8	YOR094W	promoter
A3G	chrXV	505648	505740	14	12	YOR096W	promoter
A3G	chrXV	544923	544923	13	13	YOR117W	promoter
A3G	chrXV	578389	578389	11	11	YOR134W	promoter
A3G	chrXV	580021	580146	12	12	YOR136W	promoter
A3G	chrXV	592823	592823	7	7	YOR142W	promoter
A3G	chrXV	594364	594390	32	22	YBL063W	tRNA
A3G	chrXV	639620	639723	6	6	YOR162C	ORF
A3G	chrXV	658116	658241	6	6	YOR174W	promoter
A3G	chrXV	670580	670749	9	7	YOR178C	promoter
A3G	chrXV	672840	672910	7	5	YOR179C	promoter
A3G	chrXV	683951	683961	9	9	YOR187W	promoter
A3G	chrXV	701732	701832	10	10	YOR192C	ORF
A3G	chrXV	733617	733813	6	5	YOR208W	promoter
A3G	chrXV	757781	757820	12	12	YOR222W	promoter
A3G	chrXV	761302	761302	6	6	YOR224C	promoter
A3G	chrXV	843317	843501	8	5	YOR278W	ORF
A3G	chrXV	853277	853383	6	6	YOR289W	promoter
A3G	chrXV	867013	867040	7	7	YOR293W	promoter
A3G	chrXV	877675	877791	11	10	YOR298C-A	promoter
A3G	chrXV	882540	882609	19	16	YOR302W-YOR303W	promoter
A3G	chrXV	978272	978342	31	23	YOR344C	promoter
A3G	chrXV	979459	979623	9	9	XUT	XUT
A3G	chrXV	980683	980765	7	5	YBR082C	tRNA
A3G	chrXV	989667	989858	6	6	YOR349W	promoter
A3G	chrXV	995012	995156	6	6	YOR350C	promoter
A3G	chrXV	1004379	1004571	21	14	YOR355W	promoter
A3G	chrXV	1019084	1019147	17	14	YOR362C	promoter
A3G	chrXV	1028709	1028728	11	10	YOR369C	promoter
A3G	chrXVI	40783	40830	16	12	YPL265W	promoter
A3G	chrXVI	74832	74937	31	24	YPL250C	promoter
A3G	chrXVI	75347	75366	8	8	XUT	XUT
A3G	chrXVI	115140	115140	11	11	YPL230W	promoter
A3G	chrXVI	195510	195590	6	6	YPL186C	promoter
A3G	chrXVI	198931	199006	10	9	YPL183W-A	promoter
A3G	chrXVI	228639	228716	9	9	YPL170W	ORF
A3G	chrXVI	231068	231068	10	10	YPL168W	promoter
A3G	chrXVI	242196	242196	6	6	YPL163C	ORF
A3G	chrXVI	255589	255855	7	7	YPL157W	ORF
A3G	chrXVI	259317	259352	6	6	YPL155C	promoter
A3G	chrXVI	281968	282090	7	6	YPL143W	promoter
A3G	chrXVI	301503	301528	8	7	YPL132W	promoter
A3G	chrXVI	328843	328984	7	6	YPL116W	promoter
A3G	chrXVI	378472	378481	9	7	YPL090C	promoter
A3G	chrXVI	406545	406654	6	6	YPL079W	promoter
A3G	chrXVI	411342	411469	6	6	YPL076W	ORF
A3G	chrXVI	412150	412346	17	11	YPL075W	promoter
A3G	chrXVI	426021	426164	6	6	YPL066W	promoter
A3G	chrXVI	443835	443835	6	6	XUT	XUT
A3G	chrXVI	444483	444602	8	8	YPL059W	promoter
A3G	chrXVI	445285	445382	6	6	YPL058C	ORF
A3G	chrXVI	450599	450730	9	9	YPL058C	promoter
A3G	chrXVI	451132	451256	6	5	YPL058C	promoter
A3G	chrXVI	453219	453314	22	18	YPL057C	promoter
A3G	chrXVI	463976	464043	9	8	YPL048W	promoter
A3G	chrXVI	464282	464308	11	10	YPL048W	promoter
A3G	chrXVI	475028	475212	7	6	YPL042C	promoter
A3G	chrXVI	475628	475762	6	6	YPL041C	promoter
A3G	chrXVI	525662	525666	8	7	YPL015C	ORF
A3G	chrXVI	544002	544093	7	7	YPL007C	promoter
A3G	chrXVI	551726	551734	7	6	YPL003W	promoter
A3G	chrXVI	627676	627768	6	6	YPR030W	promoter
A3G	chrXVI	639065	639283	16	12	YPR034W	promoter
A3G	chrXVI	643650	643782	6	6	YPR036W	promoter
A3G	chrXVI	645833	645855	14	10	YPR036W-A	promoter
A3G	chrXVI	647248	647255	7	7	YPR039W-YPR040W	promoter
A3G	chrXVI	694952	695092	10	9	YPR074C	promoter
A3G	chrXVI	719301	719472	6	5	YPR093C	ORF
A3G	chrXVI	819541	819694	7	6	YBL034C	tRNA
A3G	chrXVI	822524	822529	9	9	YPR145W	promoter
A3G	chrXVI	861105	861105	10	10	YPR160W-YPR160W-A	promoter
A3G	chrXVI	875104	875105	29	26	YPR165W	promoter
A3G	chrXVI	887829	887966	6	5	YPR173C	promoter
A3G	chrXVI	900783	900784	6	5	YPR183W	promoter
AID	chrI	31148	31301	8	8	YAL062W	promoter
AID	chrI	62727	62819	8	7	YAL041W	promoter
AID	chrI	67761	68016	19	16	YAL040C	promoter
AID	chrI	71623	71885	58	32	YAL038W	promoter
AID	chrI	76195	76231	8	8	YAL035W	promoter
AID	chrI	108667	108711	9	7	YAL023C	promoter
AID	chrI	124763	124826	7	6	YAL016W	promoter
AID	chrI	139173	139251	18	15	YBR083W	tRNA
AID	chrI	141492	141562	39	26	YAL005C	promoter
AID	chrI	142001	142231	37	24	YAL003W-snR18	promoter
AID	chrI	166269	166334	10	9	YAL051W	tRNA
AID	chrI	171911	171973	6	6	YAR018C	promoter
AID	chrI	181088	181249	27	22	YBL014C	tRNA
AID	chrII	9610	9723	24	20	YBL024W	tRNA
AID	chrII	36314	36480	21	17	YBR059C	tRNA
AID	chrII	36696	36745	6	6	YBL099W	promoter
AID	chrII	45504	45606	18	16	YBL092W	promoter
AID	chrII	60728	60844	14	13	YBL087C	promoter
AID	chrII	75023	75201	9	9	YBL079W	promoter
AID	chrII	84314	84324	7	7	YBL076C	promoter
AID	chrII	87991	88022	21	15	YBL075C-YBL074C	promoter
AID	chrII	89456	89548	11	10	YBL071W-A	promoter
AID	chrII	111246	111375	6	6	YBL058W	promoter
AID	chrII	113486	113669	18	15	YBL056W	promoter
AID	chrII	132242	132384	6	6	YBL046W	promoter
AID	chrII	135676	135755	9	7	YBL045C	promoter
AID	chrII	136498	136560	7	7	YBL043W	promoter
AID	chrII	140320	140392	7	7	YBL042C	promoter
AID	chrII	141175	141260	7	5	YBL041W	promoter
AID	chrII	164130	164166	16	10	YBL030C	promoter
AID	chrII	164436	164622	8	7	YBL030C	promoter
AID	chrII	165940	166061	7	4	YBL029W	promoter
AID	chrII	168323	168437	20	20	YBL027W	promoter
AID	chrII	170391	170582	6	6	YBL026W	promoter
AID	chrII	193931	194036	7	7	YBL015W	promoter
AID	chrII	197512	197675	15	14	YBL045C	tRNA
AID	chrII	227049	227212	11	10	YBR086C	tRNA
AID	chrII	235818	236031	62	34	YBL002W	promoter
AID	chrII	236329	236477	58	30	YBL003C	promoter
AID	chrII	255704	255839	22	16	YBR010W	promoter
AID	chrII	256111	256329	19	15	YBR010W	promoter
AID	chrII	266409	266438	10	9	YBR106W	tRNA
AID	chrII	275546	275574	60	38	YBR018C-YBR019C	ORF
AID	chrII	278307	278433	133	47	YBR020W	promoter
AID	chrII	278907	279059	102	40	YBR020W	promoter
AID	chrII	291932	292025	19	16	YBR025C	promoter
AID	chrII	300100	300111	12	10	YBR031W	promoter
AID	chrII	307351	307609	8	8	YBR035C	promoter
AID	chrII	310352	310418	6	6	YBR036C	promoter
AID	chrII	326740	326921	14	12	YBR161W	tRNA
AID	chrII	332760	332778	20	18	YBR048W	promoter
AID	chrII	347594	347802	28	25	YBL023C	tRNA
AID	chrII	350849	350887	8	8	YBL093C	tRNA
AID	chrII	375762	375789	28	22	YBR068C	promoter
AID	chrII	378572	378645	15	11	YBR069C	promoter
AID	chrII	381001	381132	6	6	YBR071W	ORF
AID	chrII	392849	392955	38	27	YBR078W	promoter
AID	chrII	405862	406101	14	12	YAL015C	tRNA
AID	chrII	415294	415321	11	10	YBR084C-A	promoter
AID	chrII	419165	419246	9	8	YBR085C-A	promoter
AID	chrII	423259	423370	6	5	YBR087W	promoter
AID	chrII	425817	425856	7	5	YBR088C	promoter
AID	chrII	452525	452623	10	10	YBR106W	promoter
AID	chrII	461891	461977	7	7	YBR111W-A	promoter
AID	chrII	477471	477630	79	35	YBR118W	promoter
AID	chrII	483431	483568	19	15	YBR121C-YBR121C-A	promoter
AID	chrII	490505	490883	18	14	YBR126C	promoter
AID	chrII	501625	501651	9	8	YBR132C	promoter
AID	chrII	532247	532322	11	10	YBR143C	promoter
AID	chrII	539796	539967	7	7	YBR149W	promoter
AID	chrII	564707	564925	38	32	YBR162W-A	promoter
AID	chrII	565152	565225	6	5	YBR163W	promoter
AID	chrII	592801	592848	6	5	YBR181C	promoter
AID	chrII	602449	602522	6	6	YBR187W	promoter
AID	chrII	604421	604503	11	9	YBR189W	promoter
AID	chrII	606138	606247	11	10	YBR191W	transcript
AID	chrII	613966	614113	40	26	YBR196C	promoter
AID	chrII	645182	645271	13	11	YAR028W-YAR029W	tRNA
AID	chrII	662332	662540	15	12	YBR218C	promoter
AID	chrII	680104	680112	9	9	YBR230W-A	promoter
AID	chrII	681881	681925	49	33	YBR231C	transcript
AID	chrII	704160	704384	6	5	YBR242W	promoter
AID	chrII	718099	718225	8	8	YBR250W	promoter
AID	chrII	739697	739854	6	5	YBR267W	promoter
AID	chrII	779521	779623	6	6	YBR289W	promoter
AID	chrII	800097	800284	7	6	YBR297W	promoter
AID	chrII	804878	804941	8	8	YBR298C	promoter
AID	chrII	805093	805338	8	6	YBR298C	promoter
AID	chrIII	24725	24856	7	7	YCL057W	promoter
AID	chrIII	35569	35569	7	7	YCL051W	promoter
AID	chrIII	38830	39144	9	9	YCL050C	promoter
AID	chrIII	50769	50805	6	6	YCL042W-YCL040W	promoter
AID	chrIII	61431	61589	6	6	YCL034W	promoter
AID	chrIII	77965	78122	6	6	YCL025C	promoter
AID	chrIII	107827	107961	7	7	YCL005W	promoter
AID	chrIII	122374	122428	47	28	YCR005C	promoter
AID	chrIII	123496	123666	17	13	YBR072W	tRNA
AID	chrIII	124951	125039	7	6	XUT	XUT
AID	chrIII	127645	127789	9	7	YAL027W	tRNA
AID	chrIII	127953	128080	8	7	YCR008W	promoter
AID	chrIII	137603	137702	38	24	YCR012W	promoter
AID	chrIII	142559	142586	8	8	YCR015C	promoter
AID	chrIII	142738	142782	8	7	YBL057C	tRNA
AID	chrIII	155120	155288	6	6	YCR020W-B	promoter
AID	chrIII	163282	163333	34	25	YCR025C	transcript
AID	chrIII	168184	168363	17	15	YBL092W	tRNA
AID	chrIII	172715	172752	6	6	YCR028C	promoter
AID	chrIII	178143	178323	17	12	YCR031C	promoter
AID	chrIII	178819	178838	8	8	intergenic	intergenic
AID	chrIII	207551	207738	6	6	YCR044C	ORF
AID	chrIII	216580	216622	10	8	YCR053W	promoter
AID	chrIII	225361	225502	6	5	YCR061W	promoter
AID	chrIII	227980	228211	10	7	YBR105C	tRNA
AID	chrIII	229086	229248	10	8	YCR065W	promoter
AID	chrIII	236455	236463	6	6	YCR067C	promoter
AID	chrIII	295484	295544	16	13	YBR107C	tRNA
AID	chrIV	34023	34084	14	14	YDL235C	promoter
AID	chrIV	36596	36663	6	6	YDL233W	promoter
AID	chrIV	43935	44115	16	15	YDL229W	promoter
AID	chrIV	52129	52359	7	7	YDL225W	promoter
AID	chrIV	83557	83610	7	6	YBL083C-YBL082C	tRNA
AID	chrIV	93934	94101	10	8	YDL204W	promoter
AID	chrIV	107051	107174	6	6	YDL195W	promoter
AID	chrIV	115968	116281	11	10	YDL192W	promoter
AID	chrIV	117594	117677	22	18	YDL191W	promoter
AID	chrIV	121812	121812	7	7	YDL189W	promoter
AID	chrIV	130508	130566	33	24	YDL184C	promoter
AID	chrIV	134712	134802	17	15	YDL181W	promoter
AID	chrIV	135041	135144	16	15	YDL181W	promoter
AID	chrIV	147902	148214	8	8	YDL173W	promoter
AID	chrIV	155914	156007	11	11	YDL170W	promoter
AID	chrIV	159499	159531	6	6	YDL168W	promoter
AID	chrIV	164092	164276	9	8	YDL165W	promoter
AID	chrIV	172187	172269	8	7	YDL159W	promoter
AID	chrIV	215947	216056	10	9	YDL137W	promoter
AID	chrIV	217523	217647	6	6	YDL136W	promoter
AID	chrIV	221253	221408	9	9	YDL134C	promoter
AID	chrIV	221831	221924	67	36	YDL133W	promoter
AID	chrIV	227149	227344	8	8	YDL131W	promoter
AID	chrIV	229773	229888	20	18	YDL130W	promoter
AID	chrIV	239946	240211	9	9	YDL124W	promoter
AID	chrIV	242262	242343	6	4	YDL122W	promoter
AID	chrIV	248030	248259	10	10	YDL117W	promoter
AID	chrIV	305060	305068	6	6	YDL084W	promoter
AID	chrIV	307860	307868	7	7	YDL083C	promoter
AID	chrIV	308342	308362	11	9	YDL082W	promoter
AID	chrIV	310220	310250	8	8	YDL081C	promoter
AID	chrIV	314778	314893	18	16	YDL079C	promoter
AID	chrIV	316472	316563	6	6	YDL078C	promoter
AID	chrIV	322158	322178	24	22	YDL075W	promoter
AID	chrIV	323621	323674	8	7	snR63	other
AID	chrIV	326187	326255	8	8	YDL073W	promoter
AID	chrIV	330433	330555	8	7	YDL070W	promoter
AID	chrIV	330961	330995	7	6	YDL070W	promoter
AID	chrIV	341225	341327	12	10	YDL060W	promoter
AID	chrIV	352736	352800	6	6	YDL056W	promoter
AID	chrIV	356914	356983	58	38	YDL055C	promoter
AID	chrIV	359602	359659	28	24	YBR009C	tRNA
AID	chrIV	368259	368393	9	7	YDL048C	promoter
AID	chrIV	372192	372241	6	4	YDL045W-A	promoter
AID	chrIV	404983	405030	6	6	YDL027C	promoter
AID	chrIV	410404	410477	8	8	YAL067C	tRNA
AID	chrIV	416915	416975	8	7	YDL020C	promoter
AID	chrIV	427176	427251	8	8	YDL014W	promoter
AID	chrIV	434110	434322	19	15	YBR108W	tRNA
AID	chrIV	439573	439710	7	6	YDL006W	promoter
AID	chrIV	442956	442989	11	11	YDL004W	promoter
AID	chrIV	458221	458278	6	5	YDR005C	promoter
AID	chrIV	461242	461397	6	5	YDR007W	promoter
AID	chrIV	463335	463366	9	8	YDR009W	promoter
AID	chrIV	465457	465640	7	6	YDR011W	promoter
AID	chrIV	471753	471804	6	5	YDR012W	promoter
AID	chrIV	482283	482440	6	6	YDR017C	promoter
AID	chrIV	488805	488876	13	10	YBR162C	tRNA
AID	chrIV	491397	491504	17	15	YDR025W	transcript
AID	chrIV	501365	501792	14	12	YDR028C	promoter
AID	chrIV	507774	507962	28	18	YDR033W	promoter
AID	chrIV	512447	512565	8	7	YDR034C	promoter
AID	chrIV	519746	519852	12	10	YBL022C	tRNA
AID	chrIV	520989	521118	14	13	YBL091C-A	tRNA
AID	chrIV	521650	521720	7	7	YDR035W	promoter
AID	chrIV	525026	525162	8	7	YDR037W	promoter
AID	chrIV	541808	541843	16	14	intergenic	intergenic
AID	chrIV	542586	542667	6	5	YDR043C	ORF
AID	chrIV	556462	556730	44	29	YDR050C	promoter
AID	chrIV	562492	562525	6	6	YDR054C	promoter
AID	chrIV	563431	563462	8	7	YDR055W	promoter
AID	chrIV	568899	569148	20	18	YAL014C	tRNA
AID	chrIV	579375	579428	8	8	YDR064W	promoter
AID	chrIV	587813	587964	6	6	YDR069C	promoter
AID	chrIV	591421	591577	7	7	YDR072C	promoter
AID	chrIV	599542	599680	7	7	YDR076W	ORF
AID	chrIV	600566	600803	30	22	YDR077W	promoter
AID	chrIV	619881	620002	9	8	YAL034C	tRNA
AID	chrIV	621831	622024	9	9	YDR089W	promoter
AID	chrIV	626075	626184	8	7	YDR090C	promoter
AID	chrIV	629774	629784	6	5	YDR092W	promoter
AID	chrIV	645021	645265	21	15	YBL091C	tRNA
AID	chrIV	652636	652675	11	9	YDR099W	promoter
AID	chrIV	667966	668051	8	7	YBL043W	tRNA
AID	chrIV	704080	704417	21	14	YDR127W	promoter
AID	chrIV	721521	721585	59	35	YDR133C	transcript
AID	chrIV	727933	728024	6	6	YDR137W	promoter
AID	chrIV	741709	741807	6	6	YDR142C	promoter
AID	chrIV	755210	755352	6	6	YDR150W	promoter
AID	chrIV	765235	765351	9	8	YDR152W	promoter
AID	chrIV	769030	769107	15	13	YDR156W-YDR157W	promoter
AID	chrIV	770209	770381	9	8	YDR158W	promoter
AID	chrIV	789978	790168	7	7	YDR168W	promoter
AID	chrIV	802742	802793	10	9	YBL090W	tRNA
AID	chrIV	808153	808322	11	11	YDR172W	promoter
AID	chrIV	817594	817694	7	7	YDR178W	promoter
AID	chrIV	836291	836358	6	6	YDR188W	promoter
AID	chrIV	848324	848375	6	6	YDR195W	promoter
AID	chrIV	884399	884442	50	29	YBL032W	tRNA
AID	chrIV	894484	894606	7	7	YDR216W	promoter
AID	chrIV	906924	907122	6	5	YDR221W	promoter
AID	chrIV	914800	914814	12	12	YDR224C	promoter
AID	chrIV	915394	915454	31	21	YDR225W	promoter
AID	chrIV	916280	916502	13	12	YDR226W	promoter
AID	chrIV	927164	927229	6	5	YDR232W	promoter
AID	chrIV	930351	930623	19	14	YDR234W	promoter
AID	chrIV	930865	931045	8	8	YDR234W	promoter
AID	chrIV	946273	946362	12	9	YBR133C	tRNA
AID	chrIV	974576	974711	11	8	YDR258C	promoter
AID	chrIV	976902	977038	6	6	YDR260C	ORF
AID	chrIV	980928	981142	6	6	YBR088C	tRNA
AID	chrIV	998601	998659	6	4	YDR265W	promoter
AID	chrIV	1011566	1011566	10	10	YDR275W	promoter
AID	chrIV	1013689	1013801	16	11	YDR276C	promoter
AID	chrIV	1017048	1017284	19	14	YAR018C	tRNA
AID	chrIV	1020413	1020661	9	9	YDR280W	promoter
AID	chrIV	1039501	1039597	6	6	YDR291W	promoter
AID	chrIV	1058899	1059007	7	7	YDR298C	promoter
AID	chrIV	1075473	1075612	12	10	YBR159W	tRNA
AID	chrIV	1080245	1080362	11	9	YDR309C	promoter
AID	chrIV	1095392	1095447	16	14	YBR060C	tRNA
AID	chrIV	1108489	1108673	6	6	YDR321W	promoter
AID	chrIV	1112504	1112584	10	8	YDR322C-A	promoter
AID	chrIV	1150884	1150924	15	13	YBR125C	tRNA
AID	chrIV	1155976	1156116	17	13	XUT	XUT
AID	chrIV	1161422	1161450	19	17	intergenic	intergenic
AID	chrIV	1168830	1169079	14	14	YDR347W	promoter
AID	chrIV	1175862	1175947	6	6	YBR023C	tRNA
AID	chrIV	1178243	1178255	6	6	YDR351W	promoter
AID	chrIV	1201775	1201909	14	10	YBL006C	tRNA
AID	chrIV	1222436	1222493	8	8	YDR373W	promoter
AID	chrIV	1222664	1222810	6	6	YDR373W	promoter
AID	chrIV	1228210	1228382	9	9	YDR377W	promoter
AID	chrIV	1236394	1236438	34	24	YDR381W	promoter
AID	chrIV	1239371	1239402	14	13	YDR382W	promoter
AID	chrIV	1242963	1243212	18	16	YDR385W	promoter
AID	chrIV	1256891	1257062	29	20	YBL064C	tRNA
AID	chrIV	1269929	1269980	20	17	YDR399W	promoter
AID	chrIV	1277550	1277574	6	6	YDR405W	promoter
AID	chrIV	1287972	1288080	8	7	YDR407C	promoter
AID	chrIV	1301531	1301683	18	18	YDR418W	promoter
AID	chrIV	1305622	1305806	6	4	YBR089C-A-YBR090C	tRNA
AID	chrIV	1317847	1317980	7	6	YDR422C	promoter
AID	chrIV	1352479	1352516	11	10	YBL004W	tRNA
AID	chrIV	1359852	1360032	21	16	YDR450W	promoter
AID	chrIV	1382099	1382130	6	6	YDR458C	promoter
AID	chrIV	1401663	1401768	16	13	YDR471W	promoter
AID	chrIV	1402872	1402890	10	10	YDR472W	promoter
AID	chrIV	1436695	1436944	8	7	YDR494W	promoter
AID	chrIV	1445452	1445598	24	18	YDR497C	promoter
AID	chrIV	1454525	1454613	15	13	YDR502C	promoter
AID	chrIV	1461634	1461814	24	19	YBL030C	tRNA
AID	chrIV	1468506	1468568	30	22	YDR508C	promoter
AID	chrIV	1469268	1469392	7	6	YDR510W	promoter
AID	chrIV	1489762	1489957	62	36	YDR524C-B	ORF
AID	chrIV	1490395	1490540	6	5	YDR525W-A-YDR527W	promoter
AID	chrIV	1493123	1493154	7	7	intergenic	intergenic
AID	chrIV	1493377	1493484	7	5	Unit154	transcript
AID	chrIV	1496608	1496620	13	10	YDR529C	promoter
AID	chrIV	1496797	1496825	6	6	YDR529C	promoter
AID	chrIV	1500938	1501193	7	7	YDR532C	promoter
AID	chrIV	1525406	1525406	9	9	TEL04R	telomere
AID	chrV	7781	7922	7	7	SUT086	SUT
AID	chrV	15999	16329	18	16	YEL071W	promoter
AID	chrV	32041	32075	8	8	YEL063C	ORF
AID	chrV	32253	32580	31	25	YEL063C	ORF
AID	chrV	32811	33229	51	36	YEL063C	ORF
AID	chrV	45901	45964	6	6	YEL057C	promoter
AID	chrV	51916	52074	6	4	YEL055C	promoter
AID	chrV	53215	53324	22	19	YEL054C	promoter
AID	chrV	60931	61109	8	8	YEL050C	promoter
AID	chrV	61813	61951	7	6	YBL080C	tRNA
AID	chrV	68912	68949	35	25	YEL044W	promoter
AID	chrV	77958	78003	23	19	YEL040W	promoter
AID	chrV	85547	85608	29	19	YEL034W	transcript
AID	chrV	90184	90224	12	10	YEL031W	promoter
AID	chrV	100017	100271	20	17	YBR018C-YBR019C	tRNA
AID	chrV	100633	100668	8	8	YEL027W	promoter
AID	chrV	101626	101822	17	14	YEL026W	promoter
AID	chrV	107109	107162	13	10	YEL024W	promoter
AID	chrV	117576	117611	6	6	YEL020W-A	ORF
AID	chrV	117838	118084	88	40		ncRNA
AID	chrV	122965	123199	24	20	YEL017W	promoter
AID	chrV	131094	131115	6	5	YBL088C	tRNA
AID	chrV	135374	135486	14	12	YBL003C	tRNA
AID	chrV	140355	140412	38	30	YEL009C	promoter
AID	chrV	141500	141648	15	12	YEL007W	promoter
AID	chrV	160441	160490	6	6	YER005W	promoter
AID	chrV	167590	167689	19	13	XUT	XUT
AID	chrV	171905	172058	7	6	YER009W	promoter
AID	chrV	177129	177162	10	8	YBL103C	tRNA
AID	chrV	205163	205191	7	7	YER025W	promoter
AID	chrV	213264	213394	6	5	YER030W	promoter
AID	chrV	225204	225391	21	16	YER037W	promoter
AID	chrV	237141	237236	14	12	YER043C	promoter
AID	chrV	250303	250345	6	6	YBL089W	tRNA
AID	chrV	250616	250680	7	6	YER048W-A	promoter
AID	chrV	258042	258146	10	8	YER052C	promoter
AID	chrV	268207	268311	7	7	YER056C	promoter
AID	chrV	268762	268931	7	7	XUT	XUT
AID	chrV	270224	270238	11	8	YER056C-A	promoter
AID	chrV	280777	280909	6	6	YER062C	promoter
AID	chrV	284248	284465	21	17	YER064C	promoter
AID	chrV	285110	285254	7	6	YER065C	ORF
AID	chrV	288392	288501	7	6	YBR102C	tRNA
AID	chrV	292617	292946	12	12	YER068W	promoter
AID	chrV	298802	298983	18	15	YER070W	promoter
AID	chrV	303213	303506	16	13	YER073W	promoter
AID	chrV	306257	306287	23	18	YER074W	promoter
AID	chrV	311986	312169	12	10	YAL049C	tRNA
AID	chrV	322163	322272	25	22	SRG1-YER081W	promoter
AID	chrV	332800	332902	6	6	YER087C-B	promoter
AID	chrV	335248	335399	11	11	YER088C	promoter
AID	chrV	354951	355069	11	11	YAR035W	tRNA
AID	chrV	362622	362733	10	9	YER102W	promoter
AID	chrV	396686	396748	10	9	YER117W	promoter
AID	chrV	399325	399434	8	8	YER118C	promoter
AID	chrV	409114	409167	27	21	YER124C	promoter
AID	chrV	416716	416782	10	10	YER129W	promoter
AID	chrV	423443	423535	10	10	YER131W	promoter
AID	chrV	424609	424693	45	30	intergenic	intergenic
AID	chrV	431218	431350	66	37	YAL032C	snoRNA
AID	chrV	432155	432414	14	13	YER133W	promoter
AID	chrV	434528	434715	13	12	YBL055C	tRNA
AID	chrV	437859	438033	10	9	YER134C	promoter
AID	chrV	438731	438745	8	6	YBR142W	tRNA
AID	chrV	442020	442396	52	30	YER137C	promoter
AID	chrV	443224	443257	7	6	YBL042C	tRNA
AID	chrV	469487	469517	12	8	YBR143C	tRNA
AID	chrV	474845	474985	7	7	YER154W	promoter
AID	chrV	487360	487426	10	10	YBL102W	tRNA
AID	chrV	490827	490921	7	7	YER158C	promoter
AID	chrV	492044	492177	6	5	YER159C	promoter
AID	chrV	492352	492408	18	15	YAL033W	tRNA
AID	chrV	503792	504045	8	8	YER163C	promoter
AID	chrV	510102	510238	6	6	YER165W	promoter
AID	chrV	541423	541618	6	6	YER176W	promoter
AID	chrV	545385	545562	12	11	YER177W	promoter
AID	chrV	551164	551378	14	12	YBL041W	tRNA
AID	chrVI	17389	17477	6	6	YFL055W	ORF
AID	chrVI	27855	27949	10	9	YFL052W	promoter
AID	chrVI	28154	28202	8	8	YFL052W	promoter
AID	chrVI	44382	44531	8	8	YFL045C	promoter
AID	chrVI	54774	54991	28	23	YFL039C	promoter
AID	chrVI	56044	56260	15	12	YFL037W	promoter
AID	chrVI	58533	58560	6	6	YFL036W	promoter
AID	chrVI	74643	74723	12	11	YFL032W-YFL031W	promoter
AID	chrVI	75038	75108	21	18	YFL032W-YFL031W	promoter
AID	chrVI	95025	95279	11	10	YFL021W	promoter
AID	chrVI	95884	96196	10	8	YFL021W	promoter
AID	chrVI	101428	101461	12	12	YBR074W	tRNA
AID	chrVI	157919	158006	7	5	YBR061C	tRNA
AID	chrVI	176514	176637	7	7	YFR015C	promoter
AID	chrVI	180892	181015	8	7	YBL079W	tRNA
AID	chrVI	191401	191596	19	14	YBR098W	tRNA
AID	chrVI	196368	196415	10	10	YFR022W	promoter
AID	chrVI	196581	196741	7	5	YFR022W	promoter
AID	chrVI	203481	203684	6	6	YFR024C-A	promoter
AID	chrVI	204801	204985	16	14	YAL062W	tRNA
AID	chrVI	210652	210661	8	7	YBR136W	tRNA
AID	chrVI	221458	221532	9	9	YFR031C-A	promoter
AID	chrVI	223779	223843	8	7	YFR032C-A-YFR032C-B	promoter
AID	chrVI	224751	224913	15	13	YFR033C	promoter
AID	chrVI	226694	226738	18	16	YBL001C	tRNA
AID	chrVI	233915	233947	8	8	YFR040W	promoter
AID	chrVI	255146	255282	19	13	YFR052C-A-YFR053C	promoter
AID	chrVII	23829	23885	24	18	YGL253W	promoter
AID	chrVII	56150	56437	17	12	YGL234W	promoter
AID	chrVII	73849	73877	6	6	YBR148W	tRNA
AID	chrVII	74162	74289	10	10	tV(AAC)G3	other
AID	chrVII	107563	107649	6	6	YGL205W	promoter
AID	chrVII	110634	110773	9	6	YBL052C	tRNA
AID	chrVII	115512	115549	30	21	YBR010W	tRNA
AID	chrVII	122294	122400	10	9	YBR001C	tRNA
AID	chrVII	144662	144787	22	18	YGL191W	promoter
AID	chrVII	147845	147976	7	7	YGL190C	promoter
AID	chrVII	148962	149127	33	26	YGL189C-YGL188C-A	promoter
AID	chrVII	150630	150672	7	7	XUT	XUT
AID	chrVII	180415	180544	12	11	YGL172W	promoter
AID	chrVII	185741	185761	8	7	YBR002C	tRNA
AID	chrVII	190760	190923	6	6	YGL166W	promoter
AID	chrVII	197885	197958	7	7	YGL162W	promoter
AID	chrVII	205555	205629	19	16	YBL029C-A	tRNA
AID	chrVII	254493	254576	32	22	YGL135W	promoter
AID	chrVII	277376	277560	27	21	YGL123W	promoter
AID	chrVII	280568	280568	6	6	YGL122C	promoter
AID	chrVII	287241	287413	13	10	YBR127C	tRNA
AID	chrVII	291816	291984	6	6	YGL115W	promoter
AID	chrVII	307366	307368	7	6	YGL105W	promoter
AID	chrVII	310870	310957	47	29	YGL103W	promoter
AID	chrVII	319802	319898	18	16	YBL051C	tRNA
AID	chrVII	328605	328621	8	6	YBL104C	tRNA
AID	chrVII	345746	345970	14	12	intergenic	intergenic
AID	chrVII	346935	346998	6	6	YGL086W	promoter
AID	chrVII	364031	364129	9	7	YGL077C	promoter
AID	chrVII	365940	366059	11	9	YGL076C	promoter
AID	chrVII	366587	366839	10	9	YGL075C	ORF
AID	chrVII	371101	371259	6	5	YGL071W	promoter
AID	chrVII	385104	385116	9	9	YGL062W	promoter
AID	chrVII	397571	397770	7	6	YGL056C	promoter
AID	chrVII	398419	398547	6	6	YGL055W	promoter
AID	chrVII	401350	401576	35	25	YAR042W	tRNA
AID	chrVII	405471	405800	16	15	YAL042W	tRNA
AID	chrVII	412239	412343	8	7	YBR145W	tRNA
AID	chrVII	420636	420917	14	12	YGL040C	promoter
AID	chrVII	423075	423203	20	16	YBL011W	tRNA
AID	chrVII	428030	428121	8	8	YGL036W	promoter
AID	chrVII	438347	438504	14	14	YGL030W	promoter
AID	chrVII	438878	439032	33	23	YGL030W	promoter
AID	chrVII	440647	440806	16	12	YBR062C	tRNA
AID	chrVII	442939	443189	26	23	YGL028C	promoter
AID	chrVII	472370	472498	6	6	YGL012W	promoter
AID	chrVII	478733	478759	24	24	YGL009C	promoter
AID	chrVII	482903	482964	40	27	YGL008C	promoter
AID	chrVII	485400	485482	6	6	YGL006W-A	ORF
AID	chrVII	508456	508778	12	11	YGR008C	promoter
AID	chrVII	516591	516672	11	9	YGR014W	promoter
AID	chrVII	531639	531677	8	7	YAL013W	tRNA
AID	chrVII	534809	534904	12	11	YGR027C	promoter
AID	chrVII	544581	544639	7	7	YAL012W	tRNA
AID	chrVII	545120	545170	8	7	CUT146	CUT
AID	chrVII	547687	547901	7	6	YGR032W	promoter
AID	chrVII	555718	555807	19	15	YGR034W	promoter
AID	chrVII	560048	560087	8	6	YGR038W	promoter
AID	chrVII	560481	560632	7	7	YGR038W	promoter
AID	chrVII	561596	561787	13	10	YBR093C	tRNA
AID	chrVII	577044	577191	7	7	YGR041W	promoter
AID	chrVII	581606	581788	11	10	YGR043C	promoter
AID	chrVII	584533	584618	6	6	YGR046W	promoter
AID	chrVII	599227	599372	21	17	YGR055W	promoter
AID	chrVII	605735	605874	6	5	YGR058W	promoter
AID	chrVII	609370	609454	7	7	XUT	XUT
AID	chrVII	610329	610540	7	7	YGR060W	promoter
AID	chrVII	616119	616321	12	10	YGR061C	promoter
AID	chrVII	624871	624942	9	9	YGR067C	promoter
AID	chrVII	648950	648994	33	25	YGR085C	promoter
AID	chrVII	650726	650767	29	24	YGR086C	promoter
AID	chrVII	656483	656768	9	8	YGR089W	promoter
AID	chrVII	661772	661808	18	18	YBR119W	tRNA
AID	chrVII	672112	672228	8	6	YGR094W	promoter
AID	chrVII	700995	701008	24	20	YBR011C	tRNA
AID	chrVII	702566	702729	9	9	XUT	XUT
AID	chrVII	703110	703399	10	7	YGR108W	promoter
AID	chrVII	707098	707146	8	7	YAR008W	tRNA
AID	chrVII	715543	715747	10	8	YGR111W	promoter
AID	chrVII	726925	727000	8	8	YGR118W	promoter
AID	chrVII	729754	729946	10	8	YGR119C	promoter
AID	chrVII	731166	731318	6	6	YAL025C	tRNA
AID	chrVII	733686	733794	6	6	YGR122W	promoter
AID	chrVII	736292	736459	9	8	YAL040C	tRNA
AID	chrVII	739027	739276	19	17	YBL040C	tRNA
AID	chrVII	772206	772377	15	11	YGR142W	promoter
AID	chrVII	774358	774409	10	9	YAL061W	tRNA
AID	chrVII	779612	779756	6	5	YBL059C-A	tRNA
AID	chrVII	788158	788263	16	16	YGR149W	promoter
AID	chrVII	794411	794484	7	7	YAL048C	tRNA
AID	chrVII	798403	798513	8	8	YGR155W	promoter
AID	chrVII	800348	800450	6	5	YGR156W	promoter
AID	chrVII	801651	802066	13	10	YGR157W	promoter
AID	chrVII	802252	802320	7	6	YGR157W	promoter
AID	chrVII	809481	809661	11	11	YGR161W-C	promoter
AID	chrVII	810177	810238	7	7	YGR161W-C	promoter
AID	chrVII	823931	824026	7	6	YGR162W	promoter
AID	chrVII	828548	828892	11	10	YAL041W	tRNA
AID	chrVII	845673	845702	9	9	YBL078C	tRNA
AID	chrVII	854941	854951	7	7	YGR179C	promoter
AID	chrVII	857383	857461	15	14	YBL029W	tRNA
AID	chrVII	859485	859600	14	11	YGR183C	promoter
AID	chrVII	876416	876520	22	18	YBR003W	tRNA
AID	chrVII	878174	878439	17	15	YGR189C	promoter
AID	chrVII	878715	878770	19	16	YBR128C	tRNA
AID	chrVII	880111	880249	7	7	YGR191W	promoter
AID	chrVII	883851	883912	40	25	YGR192C	promoter
AID	chrVII	904822	904987	40	27	YGR203W	promoter
AID	chrVII	909021	909102	9	9	YGR205W	promoter
AID	chrVII	913181	913435	8	8	YGR209C	promoter
AID	chrVII	914823	914889	10	10	YGR211W	promoter
AID	chrVII	915100	915201	15	13	YGR211W	promoter
AID	chrVII	920410	920555	13	12	YGR214W	promoter
AID	chrVII	922084	922091	7	6	YGR215W	promoter
AID	chrVII	939677	939730	12	11	YGR222W	promoter
AID	chrVII	951095	951228	7	7	YGR229C	promoter
AID	chrVII	959743	959907	11	10	YGR234W	promoter
AID	chrVII	974042	974177	27	24	YGR240C	promoter
AID	chrVII	976738	976854	12	9	YGR243W	promoter
AID	chrVII	977187	977310	28	21	YGR243W	promoter
AID	chrVII	1000665	1000863	9	9	YGR254W	promoter
AID	chrVII	1004066	1004404	15	13	YBR120C	tRNA
AID	chrVII	1012185	1012281	6	4	YGR260W	promoter
AID	chrVII	1050080	1050118	19	17	YGR279C	promoter
AID	chrVII	1058672	1058843	16	13	YGR282C	promoter
AID	chrVIII	36035	36131	32	24	YHL033C	transcript
AID	chrVIII	47937	48034	7	6	YHL028W	promoter
AID	chrVIII	62769	62806	8	6	YBL050W	tRNA
AID	chrVIII	75349	75359	9	8	YHL015W	promoter
AID	chrVIII	85299	85365	11	10	YBR149W	tRNA
AID	chrVIII	94637	94919	9	8	YHL008C	promoter
AID	chrVIII	98071	98143	7	6	YHL007C	promoter
AID	chrVIII	104209	104364	6	6	YHL001W	promoter
AID	chrVIII	116002	116148	10	10	YBR109C	tRNA
AID	chrVIII	123656	123669	7	7	SUT153	SUT
AID	chrVIII	126423	126583	15	13	YHR010W	promoter
AID	chrVIII	134267	134436	10	10	YBL087C	tRNA
AID	chrVIII	143611	143646	7	6	YHR020W	promoter
AID	chrVIII	146262	146316	6	4	YAL060W	tRNA
AID	chrVIII	148729	148791	23	17	YHR021C	promoter
AID	chrVIII	149392	149545	11	9	YHR021W-A	promoter
AID	chrVIII	175352	175568	8	8	YHR033W	promoter
AID	chrVIII	180033	180206	6	5	YHR036W	promoter
AID	chrVIII	209173	209330	6	6	YHR050W	ORF
AID	chrVIII	209533	209612	14	12	YHR050W-A	ORF
AID	chrVIII	231819	231909	6	6	YHR068W	promoter
AID	chrVIII	242294	242511	8	8	YHR073W-YHR073W-A	promoter
AID	chrVIII	298613	298734	6	6	YHR097C	promoter
AID	chrVIII	314864	314925	8	8	YHR100C	promoter
AID	chrVIII	328133	328254	6	5	YHR108W	promoter
AID	chrVIII	358432	358545	9	8	YBR067C	tRNA
AID	chrVIII	374434	374457	6	6	YHR135C	promoter
AID	chrVIII	381339	381612	25	17	YAL002W	snoRNA
AID	chrVIII	382771	382829	11	10	YHR142W	promoter
AID	chrVIII	385206	385249	9	9	YHR143W	ORF
AID	chrVIII	387002	387187	9	8	YHR143W-A	promoter
AID	chrVIII	388748	389082	25	21	YBR084W	tRNA
AID	chrVIII	411038	411065	17	14	YHR156C	ORF
AID	chrVIII	422713	422891	6	6	YHR162W	promoter
AID	chrVIII	443682	443745	9	9	YHR170W	promoter
AID	chrVIII	451068	451319	27	20	YHR174W	promoter
AID	chrVIII	467014	467067	31	19	YBR121C-YBR121C-A	tRNA
AID	chrVIII	470805	470889	23	17	YHR183W	promoter
AID	chrVIII	475640	475753	15	11	YBR160W	tRNA
AID	chrVIII	491827	491902	7	5	YHR196W	promoter
AID	chrVIII	505557	505630	12	11	YHR203C	promoter
AID	chrVIII	508864	508924	11	10	YHR205W	promoter
AID	chrVIII	517460	517475	7	6	YHR208W	promoter
AID	chrVIII	554123	554162	10	8	intergenic	intergenic
AID	chrIX	37287	37419	9	9	YIL162W	promoter
AID	chrIX	46130	46333	7	5	YIL158W	promoter
AID	chrIX	53734	54006	17	15	YIL155C	promoter
AID	chrIX	68640	68670	15	11	YIL149C	promoter
AID	chrIX	85156	85236	6	6	YIL141W-YIL140W	promoter
AID	chrIX	96814	96842	11	11	YIL135C	promoter
AID	chrIX	99428	99554	19	15	YIL133C	promoter
AID	chrIX	122399	122503	7	7	YIL125W	promoter
AID	chrIX	127377	127458	8	7	YIL123W	promoter
AID	chrIX	128059	128109	6	6	YIL123W	ORF
AID	chrIX	135971	136178	8	6	YIL120W	ORF
AID	chrIX	138107	138138	8	7	YIL119C	promoter
AID	chrIX	166274	166401	9	9	YIL106W	promoter
AID	chrIX	183439	183557	6	6	YBL039W-B	tRNA
AID	chrIX	197621	197655	11	10	YAR019C	tRNA
AID	chrIX	204898	205199	9	8	YIL083C	promoter
AID	chrIX	210683	210770	13	10	YBL039C-YBL039C-A	tRNA
AID	chrIX	232440	232477	10	9	YIL069C	promoter
AID	chrIX	248826	248920	13	11	YBR103W	tRNA
AID	chrIX	249528	249779	17	16	YIL056W	promoter
AID	chrIX	254837	255095	15	14	YIL053W	promoter
AID	chrIX	257096	257176	36	26	YIL052C	promoter
AID	chrIX	267890	268022	9	9	YIL046W-A	promoter
AID	chrIX	268544	268604	7	6	YIL046W	promoter
AID	chrIX	285457	285542	8	6	YIL036W	promoter
AID	chrIX	290068	290144	6	5	YIL034C	promoter
AID	chrIX	291709	291830	6	6	YIL033C	promoter
AID	chrIX	312654	312820	13	12	YIL021W	promoter
AID	chrIX	316577	316751	13	13	YIL018W	promoter
AID	chrIX	320967	321405	11	9	YIL016W	promoter
AID	chrIX	325765	325953	18	14	YBR111W-A	tRNA
AID	chrIX	338367	338637	9	9	SUT190	SUT
AID	chrIX	370441	370607	19	15	YBL107C	tRNA
AID	chrIX	382138	382195	6	6	YIR015W	ORF
AID	chrIX	384552	384593	6	5	YIR018W	promoter
AID	chrX	73696	73800	22	16	YJL191W	promoter
AID	chrX	75188	75391	13	12	YJL190C	promoter
AID	chrX	79870	79938	6	6	YJL186W	promoter
AID	chrX	85516	85622	7	5	YJL181W	promoter
AID	chrX	90632	90729	37	25	YJL177W	promoter
AID	chrX	104889	104907	8	8	YJL167W	promoter
AID	chrX	106094	106161	6	5	YJL166W	promoter
AID	chrX	106329	106357	18	14	YJL166W	promoter
AID	chrX	120357	120386	17	14	YJL159W	promoter
AID	chrX	123006	123040	16	14	YJL158C	promoter
AID	chrX	135982	136150	13	9	YJL153C	promoter
AID	chrX	136723	136846	11	11	YJL151C	promoter
AID	chrX	139969	140161	23	17	YJL148W	promoter
AID	chrX	150814	150840	12	11	YJL140W	promoter
AID	chrX	154767	154782	8	7	YJL138C	promoter
AID	chrX	157225	157367	14	14	YJL136C	promoter
AID	chrX	159901	159932	12	10	YJL133C-A	promoter
AID	chrX	160382	160500	10	9	YJL133W	promoter
AID	chrX	172969	173105	95	37	YJL130C	promoter
AID	chrX	173512	173633	7	6	YJL129C	ORF
AID	chrX	180306	180590	8	7	YJL128C	promoter
AID	chrX	187775	187854	6	6	YJL124C	promoter
AID	chrX	192322	192466	6	6	YJL117W	promoter
AID	chrX	195083	195243	6	6	YJL116C	promoter
AID	chrX	197323	197439	7	7	YAL059W	tRNA
AID	chrX	204724	204789	8	8	YAL009W	tRNA
AID	chrX	228528	228544	17	17	intergenic	intergenic
AID	chrX	233938	234056	28	22	YAL032C	tRNA
AID	chrX	268350	268460	6	6	YJL088W	promoter
AID	chrX	280690	281024	9	8	YJL082W	promoter
AID	chrX	289422	289766	9	8	YJL080C	promoter
AID	chrX	290943	290988	6	6	YJL079C	promoter
AID	chrX	293957	294242	11	9	YJL078C	promoter
AID	chrX	316537	316678	7	7	YJL062W-A	promoter
AID	chrX	342150	342307	7	7	YJL050W	promoter
AID	chrX	349397	349417	8	6	YJL047C-A-snR60	promoter
AID	chrX	355353	355586	13	11	YAL008W	tRNA
AID	chrX	374402	374555	10	9	YAL007C	tRNA
AID	chrX	378344	378421	14	12	YBR150C	tRNA
AID	chrX	381241	381261	13	11	YJL034W	promoter
AID	chrX	390912	391195	13	10	YBR024W	tRNA
AID	chrX	413435	413701	8	8	YJL012C	promoter
AID	chrX	415942	416020	10	8	YBR129C	tRNA
AID	chrX	422976	423008	8	8	YBR025C	tRNA
AID	chrX	424431	424531	23	16	YBL010C	tRNA
AID	chrX	450749	450929	7	7	YJR007W	promoter
AID	chrX	454749	454776	12	11	YJR009C	promoter
AID	chrX	466225	466526	21	18	YJR016C	promoter
AID	chrX	517810	517867	7	7	YBR020W	tRNA
AID	chrX	521716	522036	25	19	YJR046W	promoter
AID	chrX	523979	524068	6	6	YBR095C	tRNA
AID	chrX	526117	526292	21	17	YJR048W	promoter
AID	chrX	531831	532005	9	8	YBL071W-A	tRNA
AID	chrX	542989	543044	6	6	YBR138C	tRNA
AID	chrX	578259	578262	10	10	YJR077C	promoter
AID	chrX	608248	608284	10	9	YJR094W-A	promoter
AID	chrX	617945	618014	17	17	YBL018C	tRNA
AID	chrX	620545	620604	19	13	YJR103W	promoter
AID	chrX	623062	623084	8	8	YJR105W	promoter
AID	chrX	633019	633098	7	7	YJR110W	promoter
AID	chrX	647359	647374	21	16	YJR120W-YJR121W	promoter
AID	chrX	651803	651863	12	12	YJR123W	promoter
AID	chrX	663694	663800	29	21	YAL011W	snoRNA
AID	chrX	683363	683522	6	6	YJR137C	promoter
AID	chrX	700591	700737	6	5	YJR144W	promoter
AID	chrX	703093	703135	14	13	YJR145C	promoter
AID	chrXI	25027	25154	6	5	YKL216W	promoter
AID	chrXI	38615	38623	21	18	YKL210W	promoter
AID	chrXI	39079	39160	7	7	YKL210W	promoter
AID	chrXI	46652	46767	10	10	YBR123C	tRNA
AID	chrXI	48089	48203	7	7	YKL207W	promoter
AID	chrXI	70391	70550	6	6	YKL198C	promoter
AID	chrXI	74540	74744	8	7	YAL024C	tRNA
AID	chrXI	75752	75752	6	6	YKL195W	promoter
AID	chrXI	84240	84401	13	10	YBL021C	tRNA
AID	chrXI	93379	93405	7	7	YKL186C	ORF
AID	chrXI	94060	94259	7	6	YKL185W	promoter
AID	chrXI	100059	100345	13	10	YKL182W	promoter
AID	chrXI	109176	109224	22	18	YKL180W	promoter
AID	chrXI	140993	141067	13	11	YBL106C	tRNA
AID	chrXI	142788	142941	8	8	YKL164C	ORF
AID	chrXI	143563	143664	8	7	YKL164C	promoter
AID	chrXI	158574	158628	9	8	YKL156W	promoter
AID	chrXI	162402	162557	8	7	YAL037W	tRNA
AID	chrXI	164273	164637	21	18	YKL150W	promoter
AID	chrXI	164903	164940	7	6	YKL150W	promoter
AID	chrXI	166404	166509	17	15	YKL151C	promoter
AID	chrXI	171255	171330	10	9	YKL146W	promoter
AID	chrXI	171917	172055	6	4	YKL148C	promoter
AID	chrXI	174052	174147	6	6	YKL145W-YKL145W-A	promoter
AID	chrXI	178363	178492	12	10	YKL142W	promoter
AID	chrXI	179396	179471	8	8	YKL141W	promoter
AID	chrXI	202991	203090	20	15	YBR006W	tRNA
AID	chrXI	208078	208135	8	8	YKL125W	promoter
AID	chrXI	210395	210519	7	7	YKL124W-YKL123W	promoter
AID	chrXI	213071	213131	6	6	YKL122C	promoter
AID	chrXI	219930	219951	6	6	YAL058W	tRNA
AID	chrXI	231864	231894	21	17	YKL109W	promoter
AID	chrXI	245542	245619	9	7	YKL104C	promoter
AID	chrXI	259156	259223	37	24	YKL096W-A	promoter
AID	chrXI	260930	261120	10	8	YKL096W	promoter
AID	chrXI	278952	279010	18	16	YKL085W	promoter
AID	chrXI	282775	282866	13	12	YKL081W-snR38	promoter
AID	chrXI	302935	303116	11	10	YBR130C	tRNA
AID	chrXI	307080	307302	9	8	YKL069W	promoter
AID	chrXI	308056	308187	6	6	YBR151W	tRNA
AID	chrXI	313418	313451	7	7	YBL047C	tRNA
AID	chrXI	317108	317209	8	6	YKL064W	promoter
AID	chrXI	317514	317548	9	8	YKL064W	promoter
AID	chrXI	323062	323178	11	10	YKL062W	promoter
AID	chrXI	327512	327572	21	17	YKL060C	promoter
AID	chrXI	328066	328157	6	5	YKL059C	ORF
AID	chrXI	334987	335028	23	18	YKL056C	promoter
AID	chrXI	338867	338974	10	9	YKL054C	promoter
AID	chrXI	359935	360019	6	4	YKL041W	promoter
AID	chrXI	364551	364605	6	6	XUT	XUT
AID	chrXI	369693	369819	12	10	YKL035W	promoter
AID	chrXI	379710	379829	13	12	YBR152W-YBR153W	tRNA
AID	chrXI	408052	408156	10	8	YKL015W	promoter
AID	chrXI	428641	428814	7	7	YKL007W	promoter
AID	chrXI	431304	431411	10	9	YKL006W	promoter
AID	chrXI	431824	431882	11	9	YKL006W	promoter
AID	chrXI	458587	458668	16	13	YBL028C	tRNA
AID	chrXI	463654	463913	20	17	YKR013W	promoter
AID	chrXI	490998	491029	10	9	YAL031C	tRNA
AID	chrXI	514705	514864	7	7	YKR039W	promoter
AID	chrXI	518023	518145	11	11	YAL056W	tRNA
AID	chrXI	519284	519360	8	8	YKR042W	promoter
AID	chrXI	533781	534025	6	6	YKR052C	promoter
AID	chrXI	551564	551648	11	9	YKR057W	promoter
AID	chrXI	552583	552677	7	6	YKR058W	promoter
AID	chrXI	554612	555014	18	14	YKR059W	promoter
AID	chrXI	559354	559424	19	17	YAR015W	snoRNA
AID	chrXI	570946	571258	11	10	YKR069W	promoter
AID	chrXI	578975	579154	31	27	YBR014C	tRNA
AID	chrXI	583549	583733	13	12	YKR077W	promoter
AID	chrXI	615459	615655	11	9	YKR093W	promoter
AID	chrXI	618742	618844	9	8	YKR094C	promoter
AID	chrXII	48593	48710	11	10	YLL045C	promoter
AID	chrXII	54198	54355	6	5	YLL041C	promoter
AID	chrXII	68266	68311	6	6	YLL035W	promoter
AID	chrXII	92569	92659	15	15	YBR078W	tRNA
AID	chrXII	97521	97612	12	11	YLL024C	promoter
AID	chrXII	111471	111765	8	8	YLL018C	promoter
AID	chrXII	130767	130877	7	7	YLL010C	promoter
AID	chrXII	166331	166371	7	6	YLR009W	promoter
AID	chrXII	184900	185137	9	8	YLR022C	promoter
AID	chrXII	187246	187342	15	12	YLR023C	promoter
AID	chrXII	198693	198810	49	35	YAL015C	snoRNA
AID	chrXII	201516	201681	6	6	YLR028C	promoter
AID	chrXII	202604	202724	20	15	YLR029C	promoter
AID	chrXII	214893	214930	11	8	YAL047C	tRNA
AID	chrXII	234114	234188	23	18	YLR044C	promoter
AID	chrXII	253660	253818	11	10	YLR056W	promoter
AID	chrXII	259441	259603	6	6	YLR058C	promoter
AID	chrXII	263125	263168	23	18	YLR061W	promoter
AID	chrXII	282453	282528	6	6	YLR075W	promoter
AID	chrXII	282799	283029	40	28	YLR075W	promoter
AID	chrXII	283717	283914	6	6	YLR077W	promoter
AID	chrXII	289265	289306	37	31	YLR080W	ORF
AID	chrXII	290106	290176	136	44	YLR081W	promoter
AID	chrXII	320369	320426	7	6	YLR090W	promoter
AID	chrXII	329277	329352	6	5	YLR094C	promoter
AID	chrXII	341528	341654	7	5	YLR100W	promoter
AID	chrXII	348639	348678	13	10	YLR105C	promoter
AID	chrXII	366277	366320	77	43	YAL058W	snRNA
AID	chrXII	368633	368743	10	9	YLR109W	promoter
AID	chrXII	370142	370192	94	45	YLR110C	promoter
AID	chrXII	371425	371458	9	9	YLR113W	promoter
AID	chrXII	374254	374525	11	11	YAL030W	tRNA
AID	chrXII	377343	377356	6	6	YLR114C	promoter
AID	chrXII	427153	427294	9	8	YAL002W	tRNA
AID	chrXII	440252	440414	19	15	YLR150W	promoter
AID	chrXII	447612	447755	6	6	YLR153C	promoter
AID	chrXII	448556	448691	9	7	YBL086C	tRNA
AID	chrXII	468808	468928	19	15	YLR154C-H	ORF
AID	chrXII	489395	489430	31	23	RDN5-6	rRNA
AID	chrXII	498816	498880	18	17	YLR167W	promoter
AID	chrXII	500251	500358	11	10	YLR168C	promoter
AID	chrXII	505887	506123	7	6	YLR175W	promoter
AID	chrXII	510996	511201	7	5	YLR177W	ORF
AID	chrXII	514747	514818	11	10	YLR180W	promoter
AID	chrXII	515098	515190	12	10	YLR180W	promoter
AID	chrXII	522588	522625	21	17	YLR185W	promoter
AID	chrXII	539570	539701	7	7	YLR192C	promoter
AID	chrXII	541590	541672	8	7	YLR194C	promoter
AID	chrXII	541905	542081	6	6	YLR194C	promoter
AID	chrXII	545995	546051	10	10	YLR197W	promoter
AID	chrXII	554381	554442	6	6	YLR206W	promoter
AID	chrXII	585814	585912	10	8	YLR224W	promoter
AID	chrXII	592524	592572	15	13	YBL017C	tRNA
AID	chrXII	605351	605395	34	23	YBL031W	tRNA
AID	chrXII	626382	626537	7	7	YLR244C	promoter
AID	chrXII	628365	628568	19	12	YBL027W	tRNA
AID	chrXII	636590	636819	23	17	YLR249W	promoter
AID	chrXII	646082	646082	13	13	intergenic	intergenic
AID	chrXII	650928	651027	10	8	YLR256W	transcript
AID	chrXII	656944	657026	9	9	YAL055W	tRNA
AID	chrXII	657981	658128	9	9	YLR257W	promoter
AID	chrXII	658567	658599	15	12	YLR257W	promoter
AID	chrXII	660589	660628	6	5	YLR258W	promoter
AID	chrXII	665066	665081	9	7	YLR259C	promoter
AID	chrXII	669131	669277	7	7	YLR261C-YLR262C	promoter
AID	chrXII	673006	673108	7	7	YLR264W	promoter
AID	chrXII	710396	710413	6	6	YLR285C-YLR286C	other
AID	chrXII	713198	713219	7	6	YLR287C-A	promoter
AID	chrXII	721498	721508	10	10	YLR293C	promoter
AID	chrXII	722405	722507	11	11	YLR294C-YLR295C	promoter
AID	chrXII	723768	723893	7	7	YLR297W	promoter
AID	chrXII	728021	728112	8	7	YLR299W	ORF
AID	chrXII	728775	728950	31	22	YLR300W	promoter
AID	chrXII	732001	732454	26	20	YBL015W	tRNA
AID	chrXII	734752	734865	7	6	YBL038W	tRNA
AID	chrXII	737588	737654	12	11	YLR304C	promoter
AID	chrXII	751775	751922	6	6	YLR309C	promoter
AID	chrXII	783476	783529	34	27	YLR327C	promoter
AID	chrXII	784386	784776	27	20	YBR126C	tRNA
AID	chrXII	787568	787645	11	10	YLR330W	promoter
AID	chrXII	795216	795264	12	9	snR55-snR57	other
AID	chrXII	797205	797391	24	19	YBL098W	tRNA
AID	chrXII	805762	805911	20	17	YLR340W	promoter
AID	chrXII	809662	809754	8	8	YLR342W	transcript
AID	chrXII	818620	818730	11	10	YAL028W	tRNA
AID	chrXII	819248	819251	17	17	YLR344W	promoter
AID	chrXII	826563	826582	6	6	YLR347C	promoter
AID	chrXII	826846	827003	20	17	YLR347C	promoter
AID	chrXII	827914	828403	15	12	YLR350W	promoter
AID	chrXII	837436	837494	15	15	YLR354C	promoter
AID	chrXII	839333	839376	54	34	YLR355C	promoter
AID	chrXII	840221	840279	6	4	YLR356W	promoter
AID	chrXII	855793	855828	6	5	YLR367W	transcript
AID	chrXII	867073	867211	10	10	YLR372W	promoter
AID	chrXII	875415	875437	24	20	YBR015C	tRNA
AID	chrXII	878055	878246	13	12	YLR380W	promoter
AID	chrXII	898032	898166	20	14	YLR388W	promoter
AID	chrXII	906820	906996	10	10	YLR393W-YLR394W	promoter
AID	chrXII	922164	922318	11	11	SUT709	SUT
AID	chrXII	924879	924924	7	7	YLR401C	promoter
AID	chrXII	931778	931940	18	15	YLR406C	promoter
AID	chrXII	950948	951116	7	7	YLR413W	promoter
AID	chrXII	954256	954368	9	8	YLR414C-YLR415C	promoter
AID	chrXII	958161	958240	7	6	YLR419W	promoter
AID	chrXII	962912	963041	40	28	YBL020W	tRNA
AID	chrXII	988190	988445	7	7	YLR427W	promoter
AID	chrXII	1002282	1002448	46	31	YLR432W	promoter
AID	chrXII	1018917	1018980	8	8	YLR441C	promoter
AID	chrXII	1028759	1028866	7	7	YLR448W	promoter
AID	chrXII	1051985	1052117	6	6	YBL037W	tRNA
AID	chrXIII	13442	13580	6	6	YML130C	promoter
AID	chrXIII	16975	17048	7	7	YML127W	promoter
AID	chrXIII	23932	24048	8	8	YML124C	promoter
AID	chrXIII	29826	29904	8	8	YML120C	promoter
AID	chrXIII	43793	43977	6	6	YML113W	promoter
AID	chrXIII	46730	46839	7	6	YML111W	promoter
AID	chrXIII	56429	56484	12	12	YML106W	promoter
AID	chrXIII	68015	68229	10	10	YML102W	promoter
AID	chrXIII	91004	91020	11	10	YML091C	promoter
AID	chrXIII	91945	92060	13	12	YML088W	promoter
AID	chrXIII	95286	95563	11	9	YML087C	promoter
AID	chrXIII	104170	104345	17	14	YML081W	promoter
AID	chrXIII	104610	104632	6	6	YML081W	promoter
AID	chrXIII	110752	111011	8	7	YML079W	ORF
AID	chrXIII	124224	124263	8	8	YML073C	promoter
AID	chrXIII	131760	131937	15	15	YAL035W	tRNA
AID	chrXIII	146410	146563	24	19	YML063W	promoter
AID	chrXIII	159301	159353	17	14	YML058W	promoter
AID	chrXIII	164297	164342	21	16	YML055W	promoter
AID	chrXIII	168838	168853	7	5	YBR139W	tRNA
AID	chrXIII	171273	171305	7	7	YML051W	promoter
AID	chrXIII	171540	171558	18	15	YML051W	promoter
AID	chrXIII	178197	178220	6	5	YML048W	promoter
AID	chrXIII	196075	196142	11	10	YBR084C-A	tRNA
AID	chrXIII	217124	217224	6	4	YML029W	promoter
AID	chrXIII	219899	220232	28	21	YML028W	promoter
AID	chrXIII	221292	221304	6	6	YML027W	promoter
AID	chrXIII	223882	223894	7	7	YML026C	promoter
AID	chrXIII	225822	225841	12	12	YML024W	promoter
AID	chrXIII	246015	246118	9	7	YML012W	promoter
AID	chrXIII	251548	251806	10	10	YML008C	ORF
AID	chrXIII	258922	259231	15	12	YBR097W	tRNA
AID	chrXIII	271498	271564	11	11	YMR001C-A	ORF
AID	chrXIII	271955	272109	10	7	YMR002W	promoter
AID	chrXIII	282698	282802	10	9	YMR009W	promoter
AID	chrXIII	290823	290977	14	8	YBL105C	tRNA
AID	chrXIII	297070	297132	14	14	YMR013C-YMR013C-A	promoter
AID	chrXIII	321023	321194	11	9	YAL054C	tRNA
AID	chrXIII	349706	350050	12	9	YMR040W	promoter
AID	chrXIII	352248	352580	10	10	YBR068C	tRNA
AID	chrXIII	353402	353579	26	21	YMR043W	promoter
AID	chrXIII	363073	363118	10	9	YBL046W	tRNA
AID	chrXIII	372366	372488	13	12	YBR155W	tRNA
AID	chrXIII	379087	379366	17	13	YBR131W	tRNA
AID	chrXIII	388723	388745	8	8	YMR058W	promoter
AID	chrXIII	420563	420643	11	9	YBR156C	tRNA
AID	chrXIII	431244	431477	26	20	YMR081C	promoter
AID	chrXIII	434615	434847	11	10	YMR083W	ORF
AID	chrXIII	451374	451436	6	6	YMR091C	promoter
AID	chrXIII	453518	453567	8	6	YMR093W	promoter
AID	chrXIII	463541	463700	8	7	YAR002W	tRNA
AID	chrXIII	483810	483907	9	9	YMR108W	promoter
AID	chrXIII	486438	486576	6	6	YMR109W	promoter
AID	chrXIII	500765	500813	18	15	YMR116C-snR24	promoter
AID	chrXIII	504929	505003	24	19	YBL026W	tRNA
AID	chrXIII	511229	511277	17	14	YMR122W-A	promoter
AID	chrXIII	517425	517428	6	6	YMR125W	promoter
AID	chrXIII	534763	535007	12	11	YMR131C	promoter
AID	chrXIII	541019	541269	11	9	YMR136W	promoter
AID	chrXIII	551255	551259	6	6	YMR142C	promoter
AID	chrXIII	551865	551934	6	6	YMR143W	promoter
AID	chrXIII	556444	556834	22	17	YMR145C	promoter
AID	chrXIII	557445	557619	12	9	YMR146C	ORF
AID	chrXIII	560648	561014	9	7	YMR149W	promoter
AID	chrXIII	572840	572931	6	6	YBR029C	tRNA
AID	chrXIII	586649	586679	12	11	YBR157C	tRNA
AID	chrXIII	605585	605793	12	10	YMR172W	promoter
AID	chrXIII	626069	626340	19	16	YMR182W-A	ORF
AID	chrXIII	628112	628205	6	4	YMR184W	promoter
AID	chrXIII	632188	632327	29	19	YMR186W	promoter
AID	chrXIII	652207	652258	37	25	intergenic	intergenic
AID	chrXIII	652770	652963	8	7	YMR194C-B	ORF
AID	chrXIII	653868	653980	9	8	YMR195W	promoter
AID	chrXIII	668425	668460	6	6	YMR203W	promoter
AID	chrXIII	674743	675122	22	16	YMR205C	promoter
AID	chrXIII	675519	675699	12	12	YMR206W	promoter
AID	chrXIII	701647	701702	10	10	YMR217W	promoter
AID	chrXIII	731211	731253	6	6	YMR229C	promoter
AID	chrXIII	732341	732401	6	6	YMR230W	promoter
AID	chrXIII	747912	747925	9	8	YAL036C	tRNA
AID	chrXIII	754267	754273	9	9	YMR242C	promoter
AID	chrXIII	759386	759574	20	16	YMR246W	promoter
AID	chrXIII	763136	763154	8	8	intergenic	intergenic
AID	chrXIII	774601	774714	19	17	YMR251W-A	promoter
AID	chrXIII	779161	779314	6	6	YMR256C	promoter
AID	chrXIII	794555	794749	7	6	YMR263W	promoter
AID	chrXIII	808135	808365	15	14	YBL095W	tRNA
AID	chrXIII	837934	838079	10	9	YBR140C	tRNA
AID	chrXIII	852374	852527	10	10	YMR291W	promoter
AID	chrXIII	858974	859006	10	9	YMR295C	promoter
AID	chrXIII	880318	880432	11	11	YMR304C-A-YMR305C	promoter
AID	chrXIII	886892	886946	28	21	YMR307W	promoter
AID	chrXIII	895506	895540	10	10	YMR309C	promoter
AID	chrXIV	23968	24046	20	16	YNL327W	promoter
AID	chrXIV	34228	34293	8	7	YNL321W	promoter
AID	chrXIV	64650	64669	7	7	YNL301C	promoter
AID	chrXIV	65597	65634	13	13	YNL300W	promoter
AID	chrXIV	87773	87825	20	15	YNL289W	promoter
AID	chrXIV	89029	89055	38	27	Unit517	transcript
AID	chrXIV	91749	91855	10	9	YNL287W	promoter
AID	chrXIV	102750	102775	10	10	YAL022C	tRNA
AID	chrXIV	104093	104237	8	8	YNL284C	promoter
AID	chrXIV	104729	104896	14	12	YBR114W	tRNA
AID	chrXIV	106987	107186	6	5	YNL282W	promoter
AID	chrXIV	108366	108458	13	10	YNL281W	promoter
AID	chrXIV	110494	110610	13	13	YNL280C	promoter
AID	chrXIV	112785	113149	9	9	YNL278W	promoter
AID	chrXIV	117174	117200	6	5	YNL277W	promoter
AID	chrXIV	138428	138483	12	11	YNL268W	ORF
AID	chrXIV	167818	168058	27	21	YNL255C	promoter
AID	chrXIV	174603	174663	87	41	YNL251C	promoter
AID	chrXIV	182693	182848	7	7	YNL247W	promoter
AID	chrXIV	187545	187784	26	19	YNL243W	promoter
AID	chrXIV	188008	188082	7	5	YNL243W	promoter
AID	chrXIV	198046	198193	8	8	YNL241C	promoter
AID	chrXIV	200481	200523	6	6	YNL239W	promoter
AID	chrXIV	217152	217273	14	11	YNL231C	promoter
AID	chrXIV	220610	220666	13	11	YNL229C	promoter
AID	chrXIV	230712	230724	11	10	intergenic	intergenic
AID	chrXIV	251937	252122	7	7	YNL209W	promoter
AID	chrXIV	282017	282122	56	30	YNL190W	promoter
AID	chrXIV	289256	289429	8	8	YNL186W	promoter
AID	chrXIV	300835	300990	7	6	YNL180C-YNL179C	other
AID	chrXIV	301151	301182	6	6	YNL179C	transcript
AID	chrXIV	302594	302639	25	23	YNL178W	promoter
AID	chrXIV	304684	304684	6	6	YNL177C	promoter
AID	chrXIV	308682	308705	8	8	YNL175C	promoter
AID	chrXIV	310103	310276	6	5	YNL173C	promoter
AID	chrXIV	331233	331278	9	7	YNL162W	promoter
AID	chrXIV	335239	335248	8	8	XUT	XUT
AID	chrXIV	336417	336492	10	8	YNL160W	promoter
AID	chrXIV	345519	345557	8	8	YNL154C-YNL153C	ORF
AID	chrXIV	349811	349925	9	7	YNL149C	promoter
AID	chrXIV	357080	357201	9	7	YNL142W	promoter
AID	chrXIV	365821	365970	7	7	YNL138W-A	promoter
AID	chrXIV	374902	375008	8	8	YBR069C	tRNA
AID	chrXIV	380815	381056	9	8	YNL129W	promoter
AID	chrXIV	405566	405654	8	7	YNL118C	promoter
AID	chrXIV	413550	413611	6	6	YNL112W	promoter
AID	chrXIV	418545	418588	8	7	YNL110C	promoter
AID	chrXIV	426797	427079	22	18	YNL103W	promoter
AID	chrXIV	427247	427373	14	13	YNL103W	promoter
AID	chrXIV	427543	427631	9	8	YNL103W	promoter
AID	chrXIV	440704	440896	9	8	YNL097C-B	ORF
AID	chrXIV	443040	443114	20	17	YBL025W	tRNA
AID	chrXIV	444364	444443	7	6	YNL096C	promoter
AID	chrXIV	444690	444796	8	7	YNL096C	promoter
AID	chrXIV	479181	479242	7	6	YNL078W	promoter
AID	chrXIV	488165	488417	10	9	YNL073W	promoter
AID	chrXIV	493261	493348	7	7	YNL070W	promoter
AID	chrXIV	494991	495186	16	12	YNL069C	promoter
AID	chrXIV	499570	499620	38	28	YNL067W	promoter
AID	chrXIV	500888	501023	8	5	YNL066W	promoter
AID	chrXIV	507189	507378	54	33	YNL063W	promoter
AID	chrXIV	507549	507630	7	7	YNL063W	promoter
AID	chrXIV	514980	515174	12	11	YNL059C	promoter
AID	chrXIV	518859	518955	17	16	YNL055C	transcript
AID	chrXIV	531447	531708	14	13	YNL052W	promoter
AID	chrXIV	547122	547192	26	23	YBR079C	tRNA
AID	chrXIV	559112	559217	15	12	YNL037C	promoter
AID	chrXIV	559625	559903	22	19	YNL036W	promoter
AID	chrXIV	568151	568210	15	14	YBR080C	tRNA
AID	chrXIV	569854	569913	11	11	YBL036C	tRNA
AID	chrXIV	576059	576132	40	29	YNL031C	promoter
AID	chrXIV	576525	576717	28	19	YNL030W	promoter
AID	chrXIV	585521	585605	14	12	YBL103C	snoRNA
AID	chrXIV	602343	602375	7	6	YBL035C	tRNA
AID	chrXIV	613434	613567	7	7	YNL010W	promoter
AID	chrXIV	619743	619772	20	18	YNL006W	promoter
AID	chrXIV	631175	631225	27	20	YNR001C	promoter
AID	chrXIV	631766	631925	13	10	YBR073W	tRNA
AID	chrXIV	632493	632773	14	11	YAL021C	tRNA
AID	chrXIV	661851	661939	28	24	YNR017W	promoter
AID	chrXIV	663695	663757	7	6	YNR018W	promoter
AID	chrXIV	694847	694966	9	9	YNR036C	promoter
AID	chrXIV	716051	716108	25	18	YNR050C	promoter
AID	chrXIV	726052	726187	16	13	YBL019W	tRNA
AID	chrXIV	759138	759185	8	8	YNR067C	promoter
AID	chrXV	61087	61170	12	11	YOL139C	promoter
AID	chrXV	73954	74124	6	6	YOL130W	promoter
AID	chrXV	80237	80365	15	14	YOL127W	promoter
AID	chrXV	87420	87483	16	16	YOL123W	promoter
AID	chrXV	92843	92936	26	19	YOL121C	promoter
AID	chrXV	94378	94554	12	11	YOL120C	promoter
AID	chrXV	99613	99659	7	4	YOL116W	promoter
AID	chrXV	110152	110267	79	41	YOL109W	promoter
AID	chrXV	110965	111019	7	6	YBL058W	tRNA
AID	chrXV	113787	113864	6	6	YBR116C-YBR117C	tRNA
AID	chrXV	123635	123853	9	8	YOL103W	promoter
AID	chrXV	128117	128318	8	7	YOL101C	promoter
AID	chrXV	142629	142775	8	8	YOL093W	promoter
AID	chrXV	160624	160685	38	25	YOL086C	promoter
AID	chrXV	185135	185220	10	10	YOL077W-A	promoter
AID	chrXV	185374	185430	11	9	YOL077W-A	promoter
AID	chrXV	186729	186818	11	11	YOL076W	promoter
AID	chrXV	218650	218736	7	7	YOL058W	promoter
AID	chrXV	219095	219162	8	7	YOL058W	promoter
AID	chrXV	227463	227597	6	5	intergenic	intergenic
AID	chrXV	228349	228500	10	9	YAL020C	tRNA
AID	chrXV	233746	233806	16	15	YOL052C	promoter
AID	chrXV	253520	253692	20	15	YOL039W	promoter
AID	chrXV	254062	254330	19	19	YOL039W	promoter
AID	chrXV	255226	255308	7	6	YOL038W	promoter
AID	chrXV	267756	268137	14	10	YOL030W	promoter
AID	chrXV	274380	274846	22	16	YBR101C	tRNA
AID	chrXV	282181	282222	6	6	YBL060W	tRNA
AID	chrXV	288218	288330	10	10	YBR141C	tRNA
AID	chrXV	301100	301247	24	21	YBR081C	tRNA
AID	chrXV	316659	316725	6	6	YOL004W	promoter
AID	chrXV	340319	340348	8	6	YAL029C	tRNA
AID	chrXV	342549	342682	9	8	YOR008C	promoter
AID	chrXV	353927	354122	15	12	YBR118W	tRNA
AID	chrXV	357293	357447	8	7	YOR014W	transcript
AID	chrXV	370908	370932	12	10	YOR020W-A	promoter
AID	chrXV	378165	378198	6	6	YOR025W	promoter
AID	chrXV	380685	381043	23	18	YOR027W	promoter
AID	chrXV	408138	408340	15	14	YOR042W	promoter
AID	chrXV	410336	410501	6	6	YOR043W	promoter
AID	chrXV	427307	427409	7	6	YOR052C	promoter
AID	chrXV	431713	431748	10	9	YOR057W	promoter
AID	chrXV	438660	438835	24	18	YBR016W	tRNA
AID	chrXV	444484	444665	19	16	YOR063W	promoter
AID	chrXV	447052	447129	26	21	YOR065W	promoter
AID	chrXV	464398	464790	15	14	YBR085W	tRNA
AID	chrXV	487428	487504	12	8	YAL017W	tRNA
AID	chrXV	494210	494226	6	5	YOR091W	ORF
AID	chrXV	494701	494999	12	11	YOR092W	promoter
AID	chrXV	504421	504559	10	10	YOR095C	promoter
AID	chrXV	505696	505790	17	13	YOR096W	promoter
AID	chrXV	522591	522677	13	12	YOR108W	promoter
AID	chrXV	522865	522982	11	10	YOR108W	promoter
AID	chrXV	551034	551068	25	19	YOR120W	promoter
AID	chrXV	552893	553056	9	7	CUT846	CUT
AID	chrXV	572920	573145	6	6	YOR132W	promoter
AID	chrXV	574996	575050	21	19	YOR133W	promoter
AID	chrXV	580038	580211	19	17	YOR136W	promoter
AID	chrXV	586610	586737	7	6	YOR140W	promoter
AID	chrXV	594334	594404	39	25	YBL063W	tRNA
AID	chrXV	606213	606242	6	6	YOR147W	promoter
AID	chrXV	631817	631859	7	7	YOR158W	promoter
AID	chrXV	638676	638879	6	6	YOR161C	promoter
AID	chrXV	648999	649253	14	12	YOR168W	promoter
AID	chrXV	653990	654226	6	6	YOR172W	promoter
AID	chrXV	663774	663867	6	6	YBR158W	tRNA
AID	chrXV	670468	670694	14	12	YOR178C	promoter
AID	chrXV	678831	678852	8	7	YOR182C	promoter
AID	chrXV	683879	683989	23	19	YOR187W	promoter
AID	chrXV	710123	710351	12	12	YBR021W	tRNA
AID	chrXV	738240	738351	6	6	YOR210W	promoter
AID	chrXV	741675	741767	6	6	YOR211C	promoter
AID	chrXV	755034	755267	7	7	YOR220W	promoter
AID	chrXV	757608	757852	8	7	YOR222W	promoter
AID	chrXV	759569	759589	11	11	YOR223W	promoter
AID	chrXV	761247	761354	8	8	YOR224C	promoter
AID	chrXV	772409	772432	6	5	YOR231W	promoter
AID	chrXV	779411	779621	17	16	YOR234C	promoter
AID	chrXV	780059	780103	43	31	intergenic	intergenic
AID	chrXV	784657	784828	8	6	YOR239W	promoter
AID	chrXV	797344	797466	38	29	YOR247W-YOR248W	promoter
AID	chrXV	813714	813928	11	11	YOR260W	promoter
AID	chrXV	820707	820926	6	5	YOR266W	promoter
AID	chrXV	832277	832321	21	15	YOR272W	promoter
AID	chrXV	836529	836676	6	6	YOR274W	promoter
AID	chrXV	841117	841289	11	9	YOR276W	promoter
AID	chrXV	842211	842512	18	15	YAL013W	snoRNA
AID	chrXV	854120	854339	15	13	YAL046C	tRNA
AID	chrXV	867009	867070	14	12	YOR293W	promoter
AID	chrXV	877735	877792	43	27	YOR298C-A	promoter
AID	chrXV	882432	882767	27	19	YOR302W-YOR303W	promoter
AID	chrXV	898344	898483	7	7	YOR309C-YOR310C	promoter
AID	chrXV	901203	901243	7	7	YOR312C	promoter
AID	chrXV	904523	904694	12	10	YOR315W	promoter
AID	chrXV	907606	907721	7	6	YOR316C	promoter
AID	chrXV	953886	954045	6	6	YOR337W	promoter
AID	chrXV	967765	967985	14	11	YOR342C	promoter
AID	chrXV	976460	976492	14	14	YBR030W	tRNA
AID	chrXV	978205	978409	17	15	YOR344C	promoter
AID	chrXV	980724	980899	15	13	YBR082C	tRNA
AID	chrXV	995029	995110	6	6	YOR350C	promoter
AID	chrXV	1003829	1003990	8	6	SUT388	SUT
AID	chrXV	1004465	1004637	33	22	YOR355W	promoter
AID	chrXV	1011018	1011109	11	10	YOR359W	promoter
AID	chrXV	1028580	1028767	29	21	YOR369C	promoter
AID	chrXV	1031236	1031376	10	9	YOR370C	promoter
AID	chrXV	1043069	1043157	12	12	YOR375C	promoter
AID	chrXVI	30015	30101	16	13	YPL270W	promoter
AID	chrXVI	40833	40912	10	10	YPL265W	promoter
AID	chrXVI	47117	47238	7	5	YPL262W	promoter
AID	chrXVI	56060	56257	11	11	YBR132C	tRNA
AID	chrXVI	66754	66948	16	11	YPL256C	promoter
AID	chrXVI	74764	74951	24	17	YPL250C	promoter
AID	chrXVI	76265	76380	15	15	YPL249C-A	promoter
AID	chrXVI	98576	98725	23	19	YPL239W	promoter
AID	chrXVI	108447	108600	15	12	YPL231W	promoter
AID	chrXVI	115039	115179	12	11	YPL230W	promoter
AID	chrXVI	121556	121815	6	6	YPL226W	promoter
AID	chrXVI	132193	132254	6	6	YPL222W	ORF
AID	chrXVI	135724	135769	7	6	YPL220W	promoter
AID	chrXVI	143260	143381	7	7	YPL216W	promoter
AID	chrXVI	147335	147398	6	5	YPL215W	promoter
AID	chrXVI	153401	153547	8	7	YPL211W	promoter
AID	chrXVI	159739	159862	9	8	YPL207W	promoter
AID	chrXVI	173074	173104	34	25	YPL198W-snR59	promoter
AID	chrXVI	188577	188642	12	11	YPL189C-A	promoter
AID	chrXVI	191178	191362	8	8	YPL188W	promoter
AID	chrXVI	198671	199036	11	10	YPL183W-A	promoter
AID	chrXVI	207556	207711	7	6	YPL179W	promoter
AID	chrXVI	210148	210286	13	12	YBL097W	tRNA
AID	chrXVI	230956	231097	6	6	YPL168W	promoter
AID	chrXVI	242739	242772	6	5	YPL163C	promoter
AID	chrXVI	256841	257021	8	7	YPL156C	promoter
AID	chrXVI	270989	271118	7	7	YPL149W	promoter
AID	chrXVI	279843	280049	7	7	YPL144W	promoter
AID	chrXVI	281538	281600	15	12	YPL143W	promoter
AID	chrXVI	282032	282099	20	18	YPL143W	promoter
AID	chrXVI	297429	297533	19	15	YPL135W	promoter
AID	chrXVI	303026	303106	32	22	YPL131W	promoter
AID	chrXVI	328881	328999	6	6	YPL116W	promoter
AID	chrXVI	329327	329390	7	7	YPL116W	promoter
AID	chrXVI	338827	339019	13	11	YBR022W	tRNA
AID	chrXVI	352302	352435	20	18	YPL106C	promoter
AID	chrXVI	352593	352625	7	6	YPL106C	promoter
AID	chrXVI	378436	378472	21	20	YPL090C	promoter
AID	chrXVI	381541	381810	8	8	YPL089C	promoter
AID	chrXVI	383254	383358	6	6	YPL087W	promoter
AID	chrXVI	393828	394059	6	6	YPL084W	promoter
AID	chrXVI	404199	404264	6	6	YPL082C	promoter
AID	chrXVI	404869	404925	20	15	YPL081W	promoter
AID	chrXVI	408805	408842	14	12	YPL078C	promoter
AID	chrXVI	412219	412390	10	10	YPL075W	promoter
AID	chrXVI	425878	426306	11	7	YPL066W	promoter
AID	chrXVI	432360	432559	28	20	YPL061W	promoter
AID	chrXVI	435898	435972	12	11	YAR014C	tRNA
AID	chrXVI	445288	445424	11	9	YPL058C	ORF
AID	chrXVI	453182	453387	25	18	YPL057C	promoter
AID	chrXVI	458431	458571	6	6	YPL052W	promoter
AID	chrXVI	461990	462186	9	7	YPL050C	promoter
AID	chrXVI	463869	463962	6	6	YPL048W	promoter
AID	chrXVI	464123	464330	7	6	YPL048W	promoter
AID	chrXVI	479067	479248	7	7	YPL039W-YPL038W-A	promoter
AID	chrXVI	481959	482016	12	11	YPL036W	promoter
AID	chrXVI	491567	491786	8	8	YPL032C	promoter
AID	chrXVI	517433	517621	7	7	YPL018W	promoter
AID	chrXVI	520579	520590	9	9	YPL016W	promoter
AID	chrXVI	526790	526984	7	7	YPL015C	promoter
AID	chrXVI	534738	534796	7	4	YPL010W	promoter
AID	chrXVI	544426	544658	7	6	YPL006W	promoter
AID	chrXVI	551696	551810	13	12	YPL003W	promoter
AID	chrXVI	560206	560275	8	7	YBR070C	tRNA
AID	chrXVI	572252	572447	20	16	YBL067C	tRNA
AID	chrXVI	581218	581316	6	5	YPR010C	promoter
AID	chrXVI	582055	582176	12	11	YBR008C	tRNA
AID	chrXVI	582811	582840	35	27	YPR010C-A	promoter
AID	chrXVI	607372	607514	8	7	YPR022C	promoter
AID	chrXVI	622541	622628	7	6	YBR071W	tRNA
AID	chrXVI	641895	642090	22	18	YPR035W	promoter
AID	chrXVI	645749	645955	58	32	YPR036W-A	promoter
AID	chrXVI	654045	654201	16	12	YPR043W	promoter
AID	chrXVI	665982	666090	6	5	YPR054W	transcript
AID	chrXVI	679516	679656	6	6	YPR065W	promoter
AID	chrXVI	689582	689703	8	7	YBR104W	tRNA
AID	chrXVI	694903	695069	40	24	YPR074C	promoter
AID	chrXVI	700502	700562	35	26	YPR080W	promoter
AID	chrXVI	719349	719558	12	10	YPR093C	ORF
AID	chrXVI	725007	725018	9	9	YPR097W	promoter
AID	chrXVI	731820	731846	8	6	YPR103W	promoter
AID	chrXVI	739987	740134	8	7	YPR106W	promoter
AID	chrXVI	744293	744458	14	13	YBR122C	tRNA
AID	chrXVI	769151	769306	29	19	YBR017C	tRNA
AID	chrXVI	771221	771288	6	6	YPR119W	promoter
AID	chrXVI	775770	775929	7	7	YAR015W	tRNA
AID	chrXVI	784219	784437	11	11	YPR122W	promoter
AID	chrXVI	794803	794953	11	11	YPR132W	promoter
AID	chrXVI	802011	802071	9	9	YPR137W	promoter
AID	chrXVI	810705	810880	10	10	YAL016W	tRNA
AID	chrXVI	821420	821713	15	12	YPR144C	promoter
AID	chrXVI	822453	822555	18	16	YPR145W	promoter
AID	chrXVI	829595	829851	11	9	YPR149W	promoter
AID	chrXVI	840077	840227	12	10	YPR156C	promoter
AID	chrXVI	843144	843207	7	6	YPR158W	promoter
AID	chrXVI	856891	856965	8	8	YAL053W	tRNA
AID	chrXVI	857288	857442	9	9	YPR159W	promoter
AID	chrXVI	860408	860516	6	6	YBL066C	tRNA
AID	chrXVI	861004	861125	7	7	YPR160W-YPR160W-A	promoter
AID	chrXVI	875073	875137	6	6	YPR165W	promoter
AID	chrXVI	880153	880344	12	10	YBL033C	tRNA
AID	chrXVI	883029	883175	9	9
