# Supplementary material for: Active RNAP pre-initiation sites are highly mutated by cytidine deaminases in yeast, with AID targeting small RNA genes
Source: eLife journal article supplement (doi:10.7554/elife.03553), 2014-09-18
Supplement: supp [file elife_poa_e03553_Figure_2_Figure_Supplement_1.docx]

Figure 2 – figure supplement 1

|  | Diploid only MEL | Overlapping MEL | Haploid only MEL |
| --- | --- | --- | --- |
| AID* | 1144 | 83 | 2 |
| sA3G* | 568 | 6 | 0 |
