# Supplementary material for: Active RNAP pre-initiation sites are highly mutated by cytidine deaminases in yeast, with AID targeting small RNA genes
Source: eLife journal article supplement (doi:10.7554/elife.03553), 2014-09-18
Supplement: supp [file elife_poa_e03553_Figure_4_Figure_Supplement_1.docx]

**Figure 4 – figure supplement 1**

| **Feature** | **Overlapping MEL** | **Median number of WRC motifs per 550bp fragment** | **Median number of YCC motifs per 550bp fragment** |
| --- | --- | --- | --- |
| mRNA | None | 63.0 | 20.0 |
| Yes | 63.0 | 23.0 |
| snoRNA | None | 61.0 | 17.5 |
| Yes | 61.5 | 20.0 |
| snRNA | No | all targeted by AID | 23.5 |
| Yes | 64.0 | 20.5 |
| tRNA | None | 60.0 | 20.0 |
| Yes | 52.0 | 22.0 |
