# Supplementary material for: Active RNAP pre-initiation sites are highly mutated by cytidine deaminases in yeast, with AID targeting small RNA genes
Source: eLife journal article supplement (doi:10.7554/elife.03553), 2014-09-18
Supplement: supp [file elife_poa_e03553_Figure_4_Figure_Supplement_4.docx]

Figure 4 - figure supplement 4

***QmRLFS-finder.***

| Number of R-loop forming regions | 78 |
| --- | --- |
| Number of genes with an R-loop regions within 500 bp  mRNA transcripts  CUTs  SUTs  XUTs | 34  24  4  3  3 |
| Number of genes containing R-loop and a MEL within 500bp | 21 |
| Expected number from a randomised subset of genes | 18.4 |

***SkewR package.***

| Number of genes containing R-loops  mRNA transcripts  CUTs  ncRNA  rRNA  SUTs  XUTs | 59 30  4  2  1  8  14 |
| --- | --- |
| Number of genes containing R-loop with a MEL in the promoter | 22 |
| Expected number from a randomised subset of genes | 13.6 |

| Number of GC skewed regions in genome | 124 |
| --- | --- |
| Number of GC skewed regions with a MEL within 200bp | 36 |
| Expected number from randomised fragments | 18.6 |

| Average number of AID* mutations in promoters | 2.1 |
| --- | --- |
| Average number of AID* mutations in R-loop gene promoters | 2.0 |
| Average number of sA3G* mutations in promoters | 1.1 |
| Average number of sA3G* mutations in R-loop gene promoters | 1.4 |
