# Supplementary figures and images for: Active RNAP pre-initiation sites are highly mutated by cytidine deaminases in yeast, with AID targeting small RNA genes
Source: eLife journal article supplement (doi:10.7554/elife.03553), 2014-09-18

Figure 3 - figure supplement 1

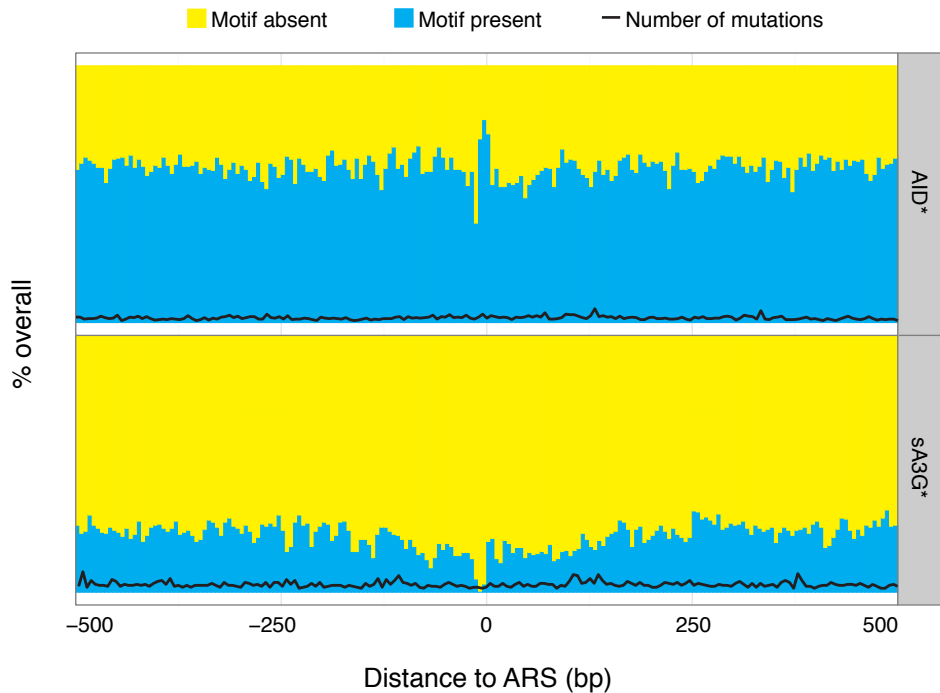

Supplement: supp [file elife-03553-supp-v1.zip]

Figure 5 - figure supplement 2

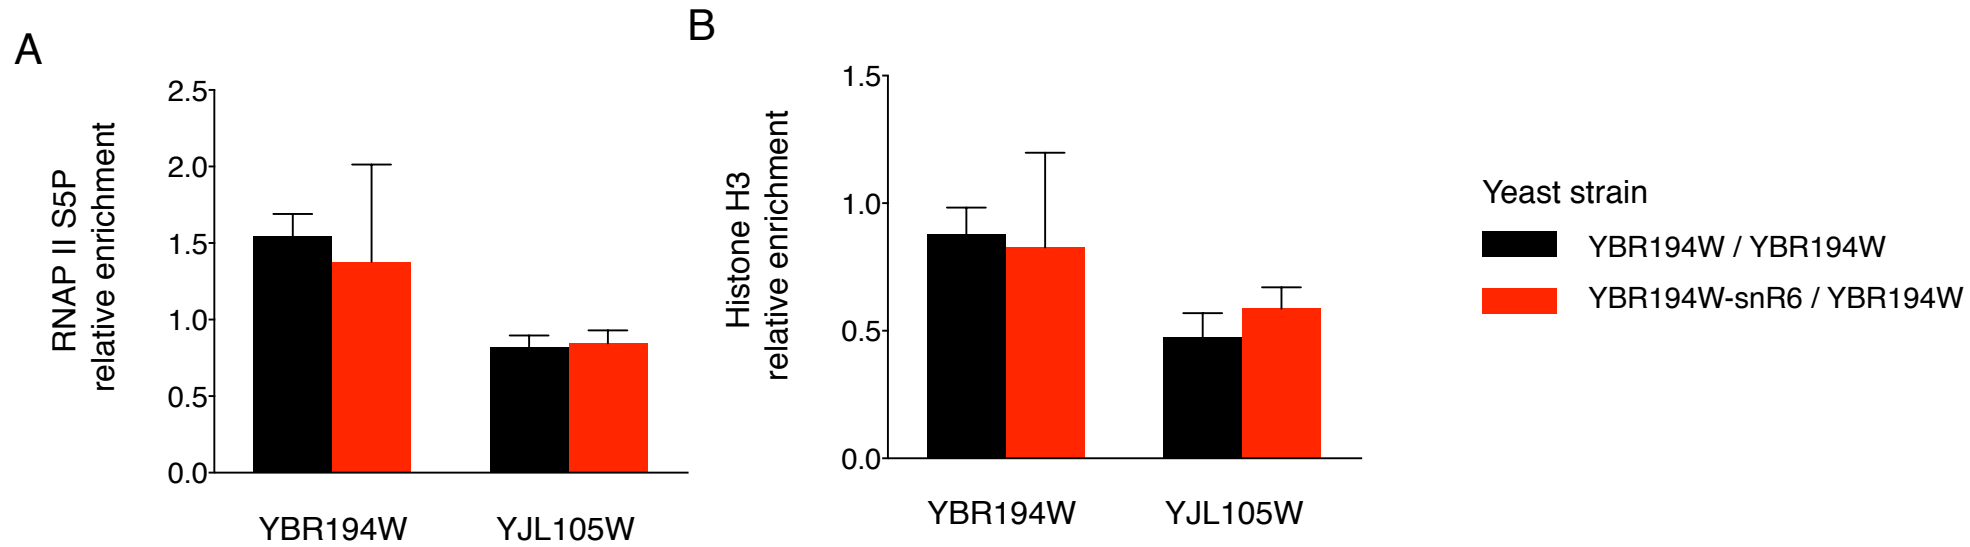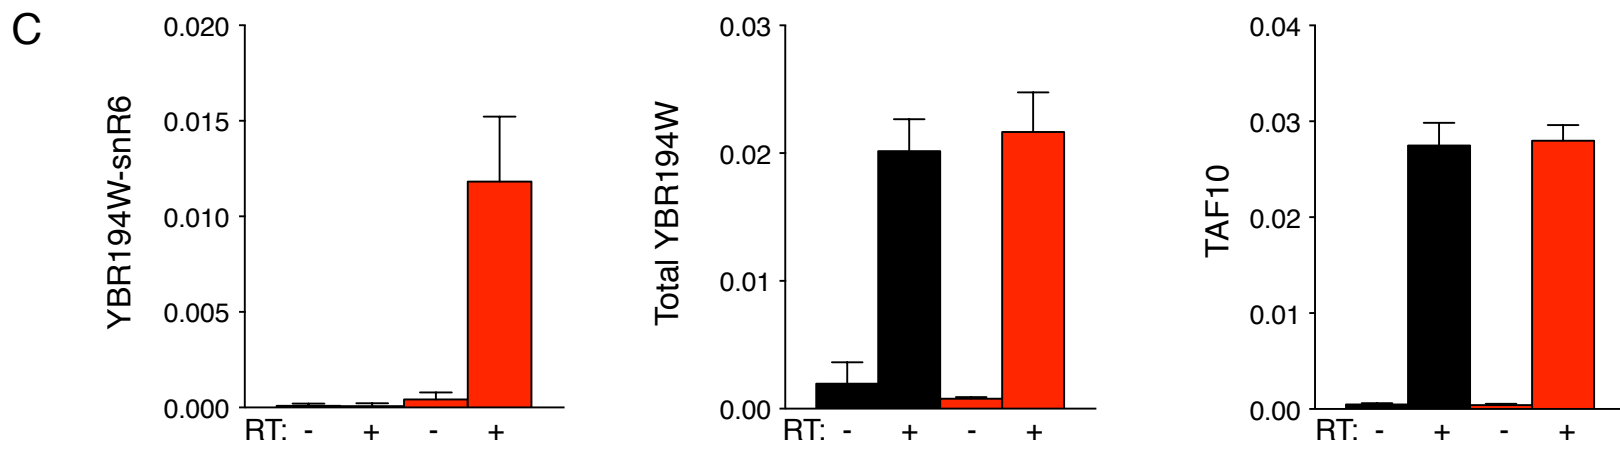

Supplement: supp [file elife-03553-supp-v1.zip]

Figure 4 - figure supplement 2

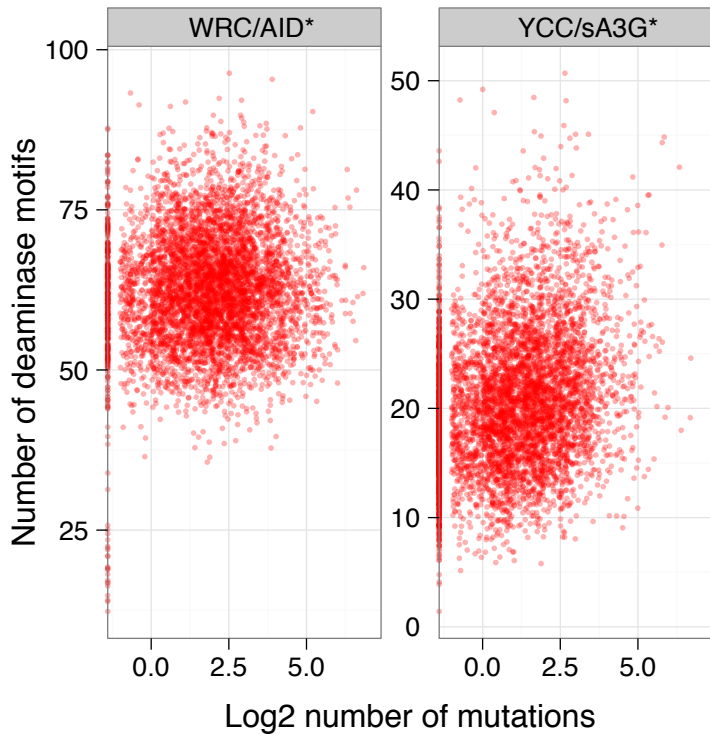

Supplement: supp [file elife-03553-supp-v1.zip]

Figure 4 - figure supplement 3

A

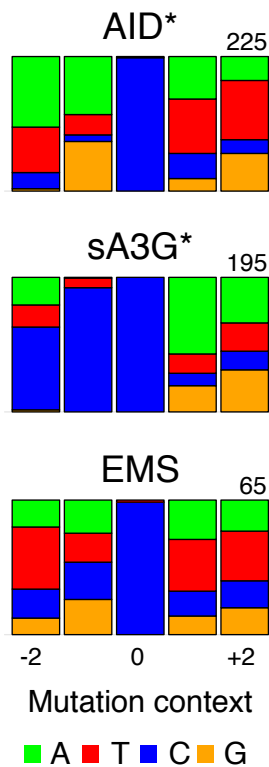

B

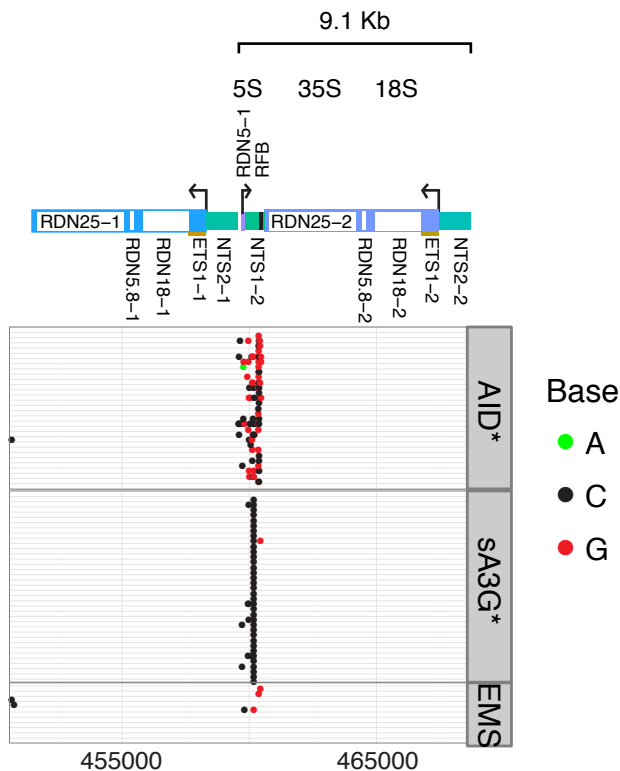

Supplement: supp [file elife-03553-supp-v1.zip]

Figure 3 - figure supplement 2

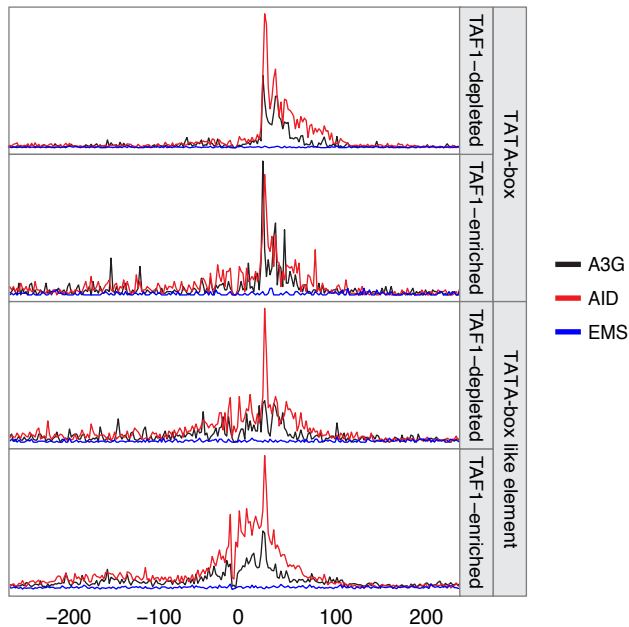

Supplement: supp [file elife-03553-supp-v1.zip]

Figure 5 - figure supplement 1

A

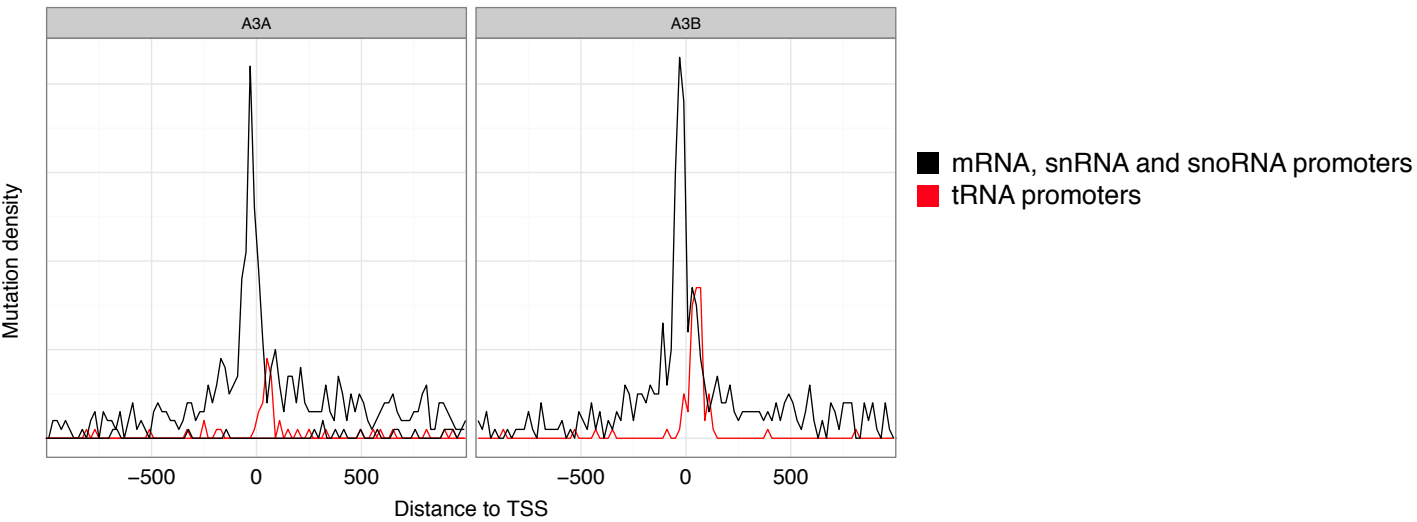

B

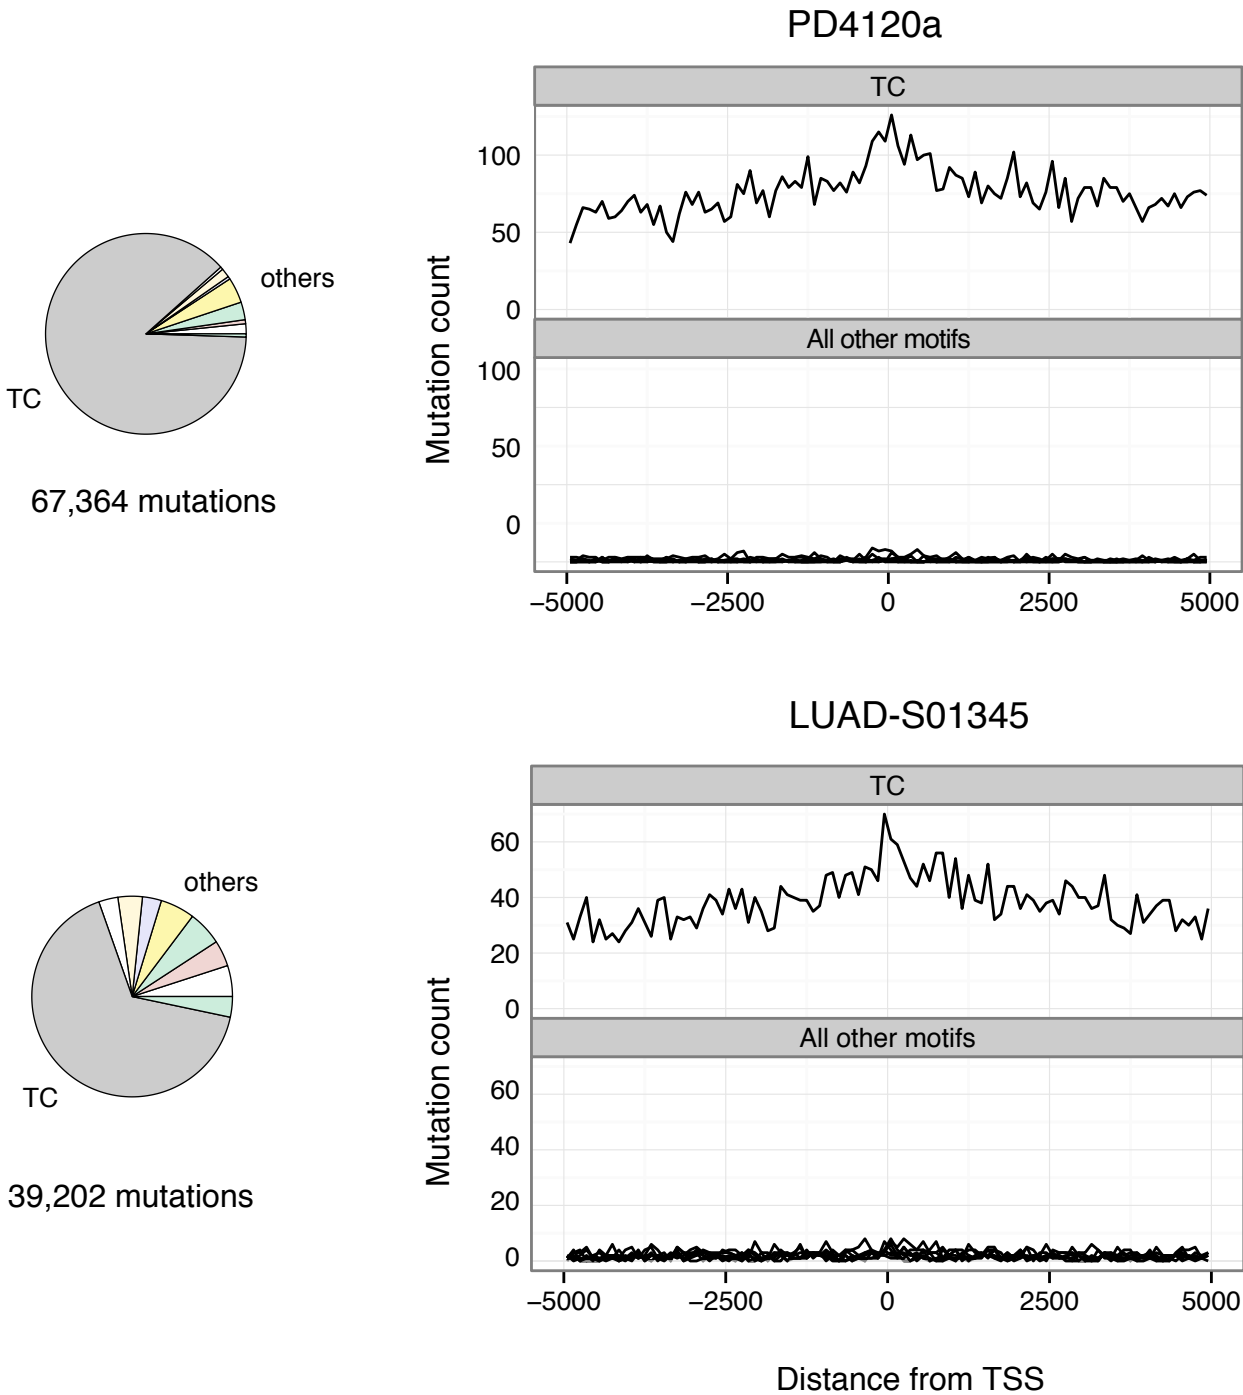

Supplement: supp [file elife-03553-supp-v1.zip]

Figure 2 - figure supplement 2

A

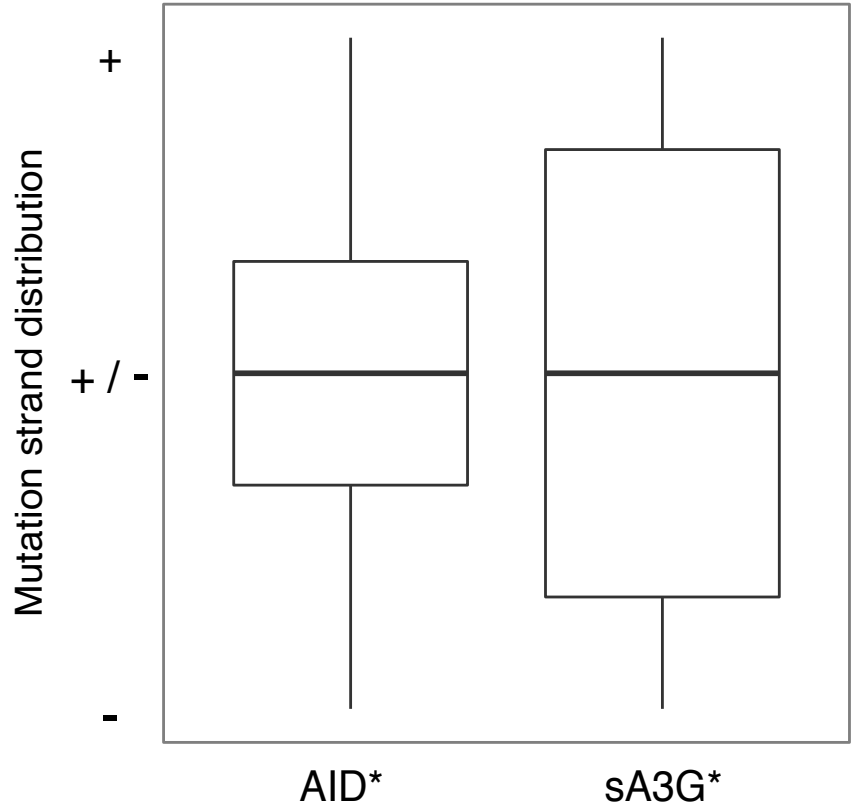

B

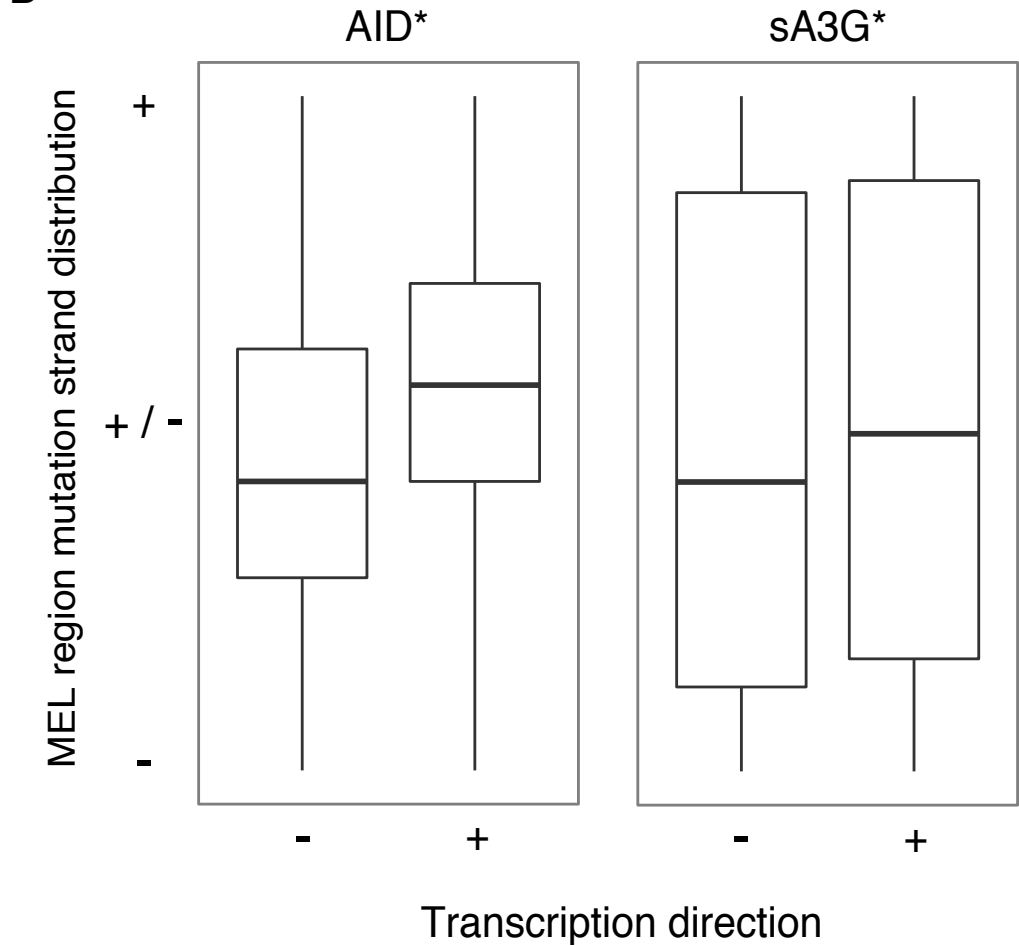

C

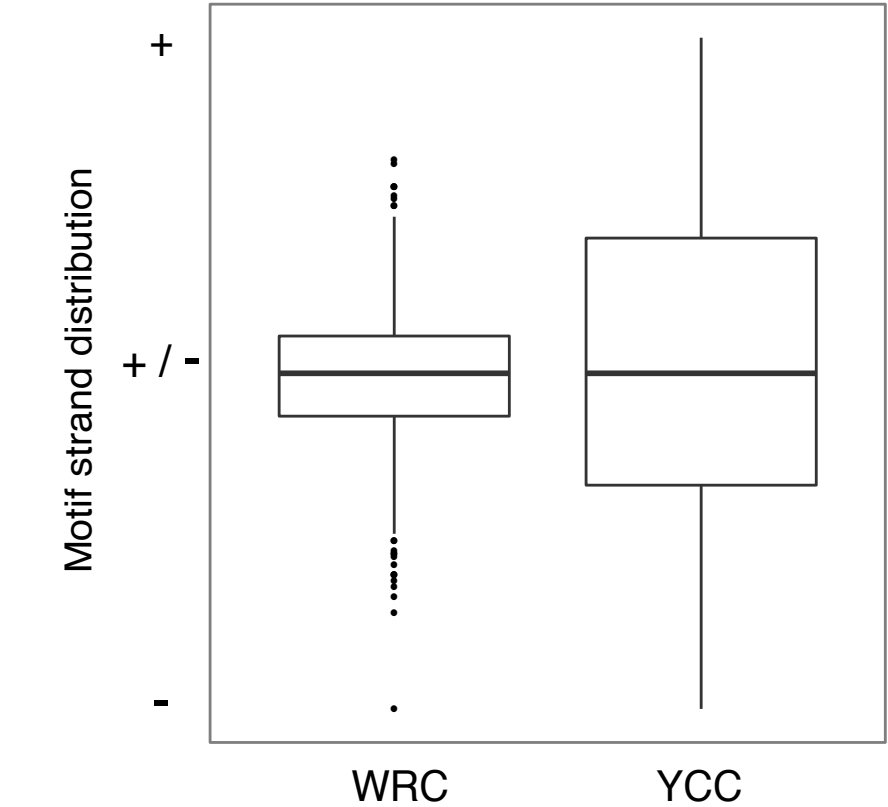

Supplement: supp [file elife-03553-supp-v1.zip]

Figure 3 - figure supplement 3

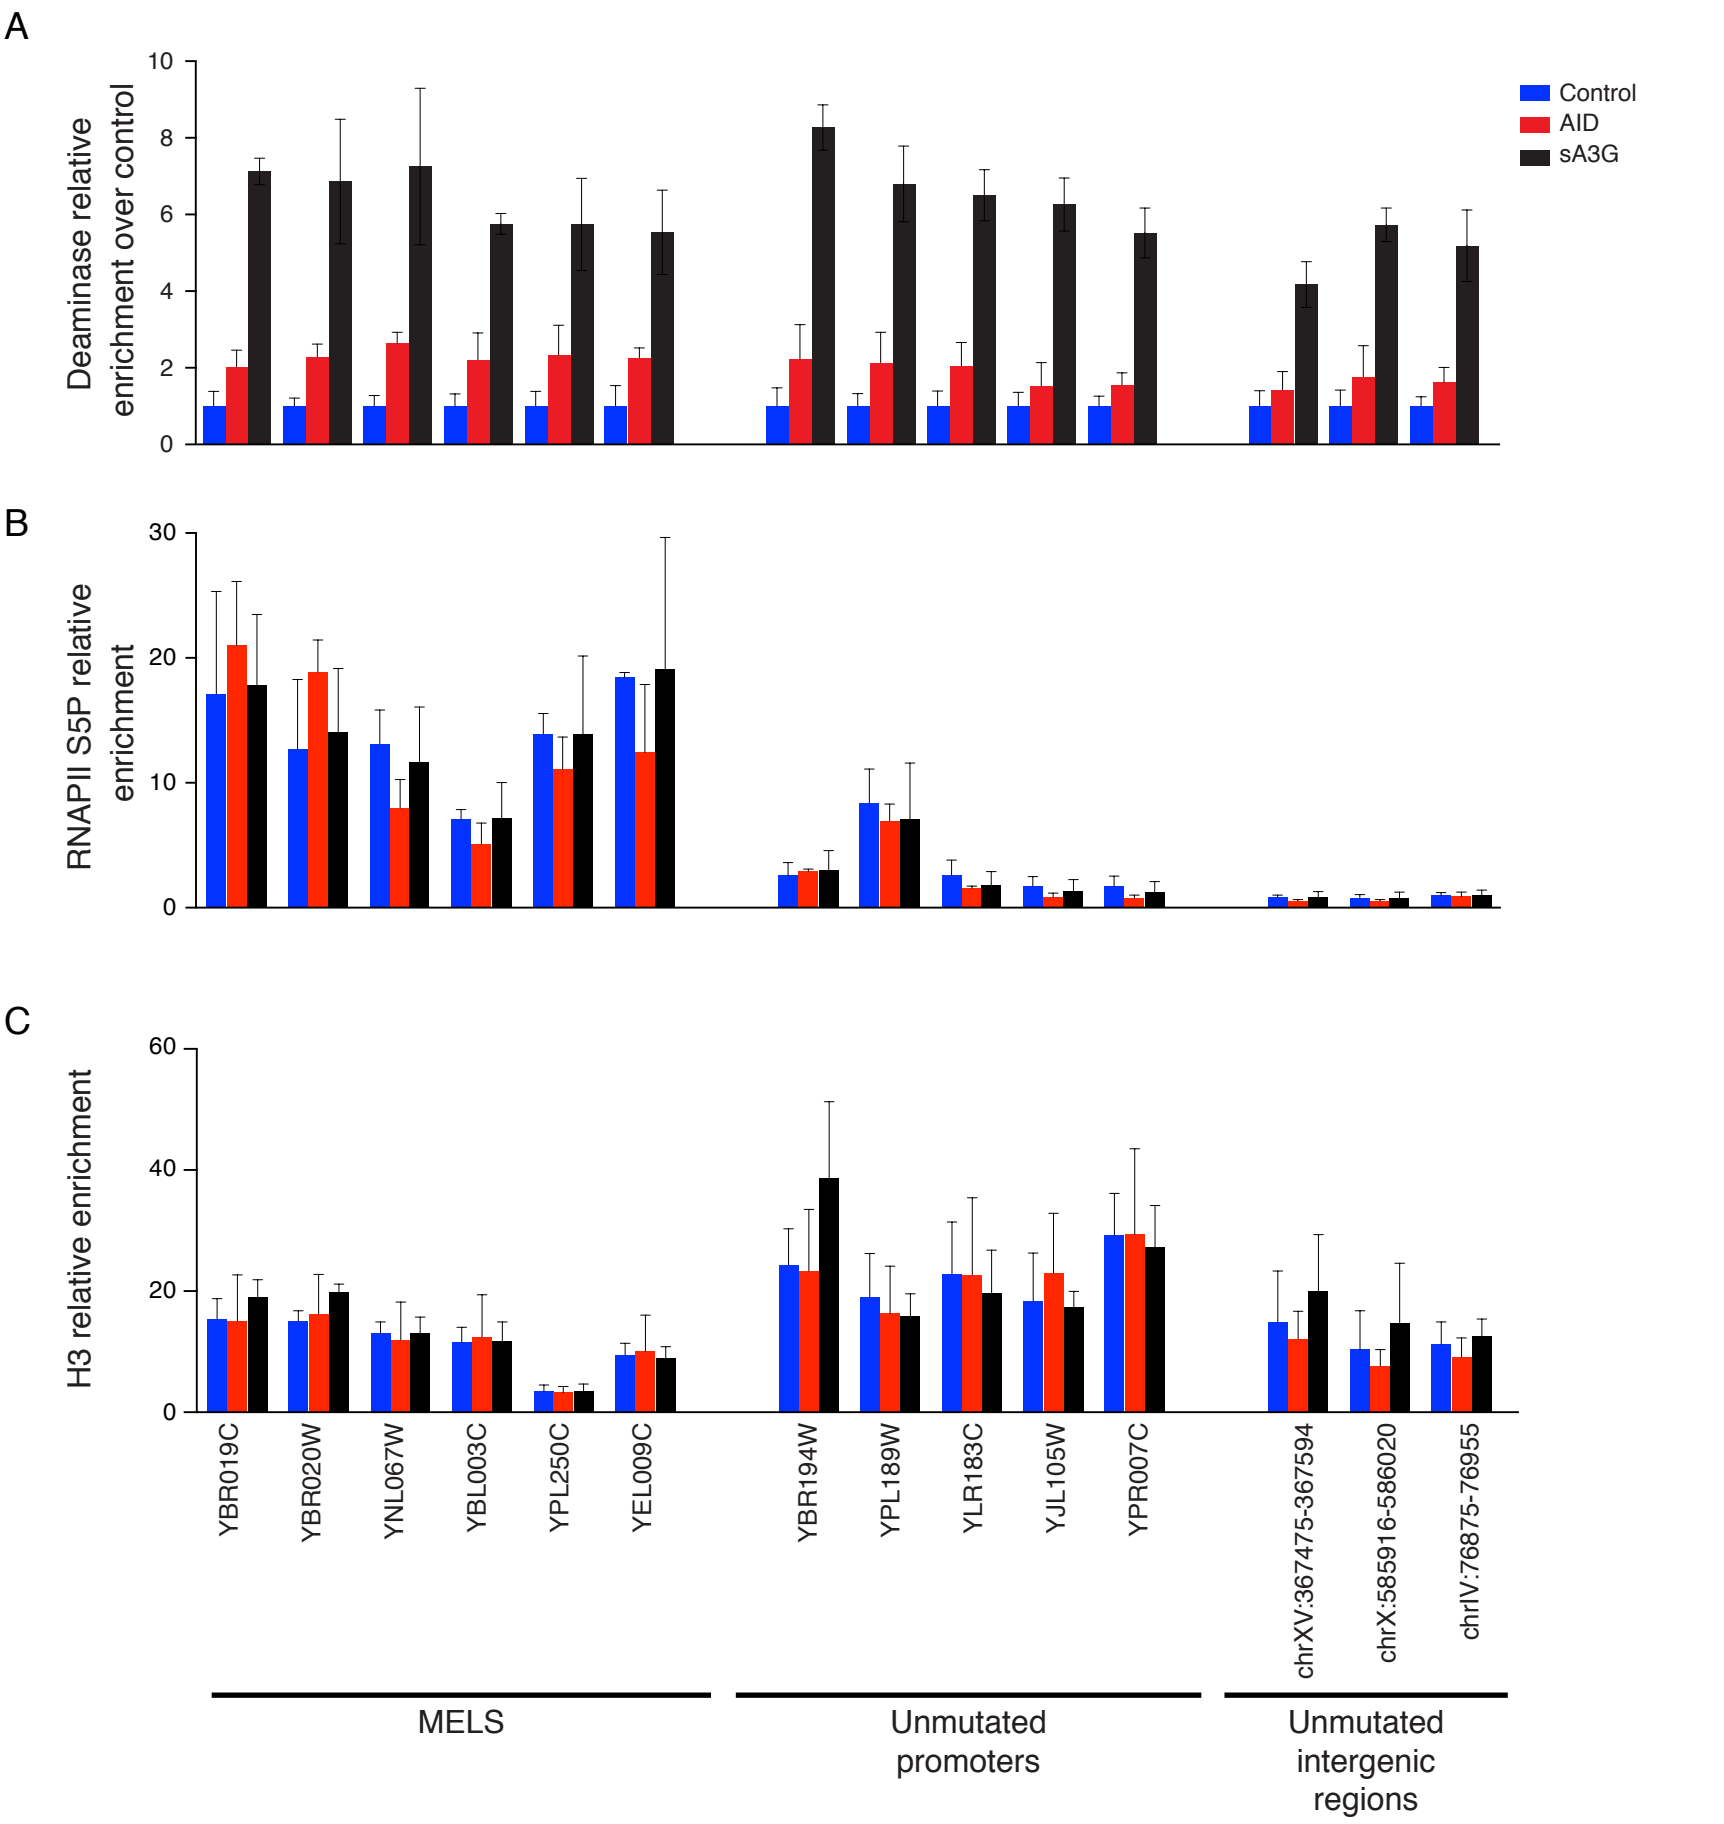

Supplement: supp [file elife-03553-supp-v1.zip]

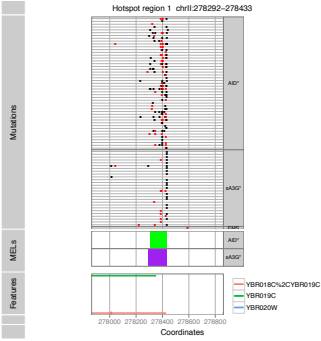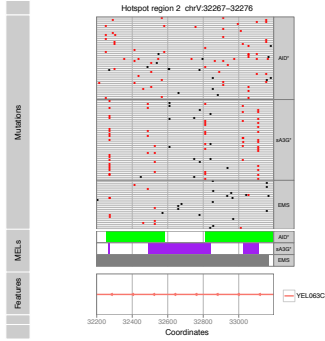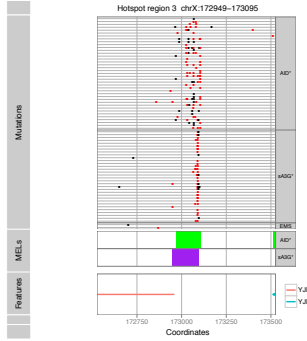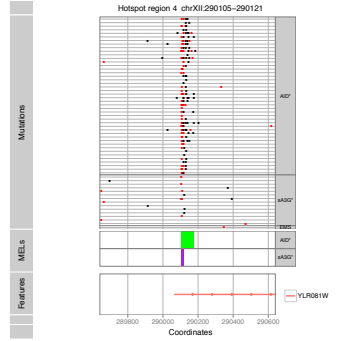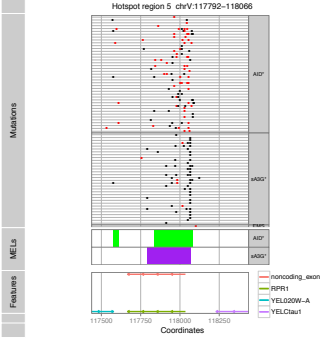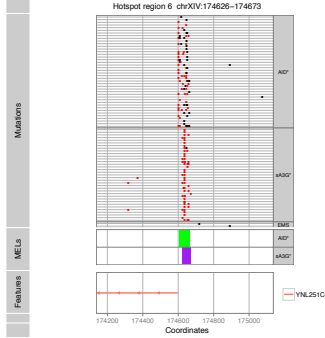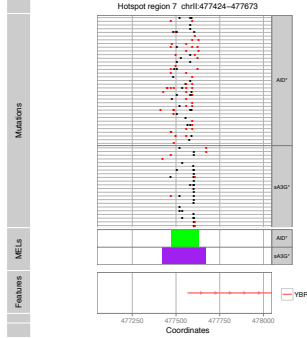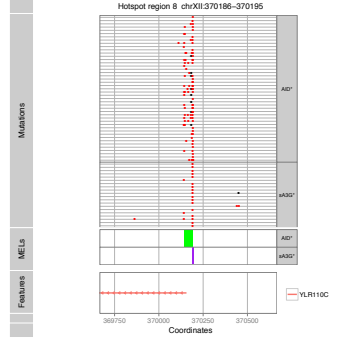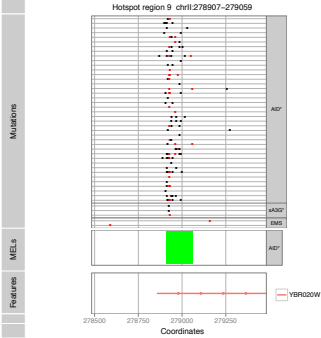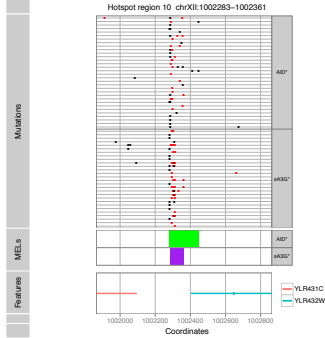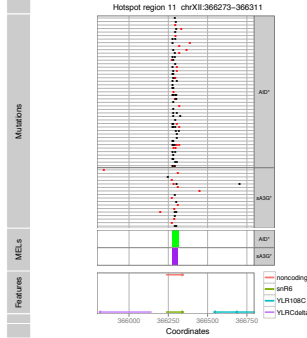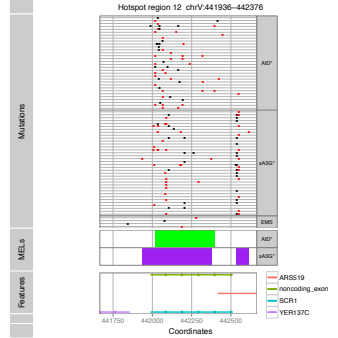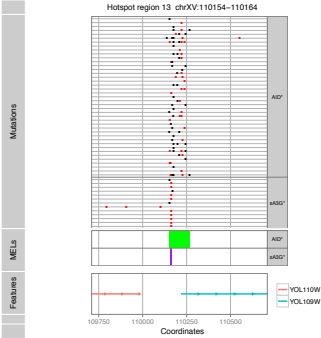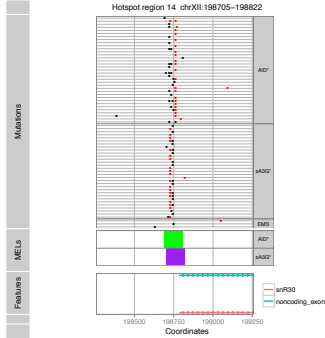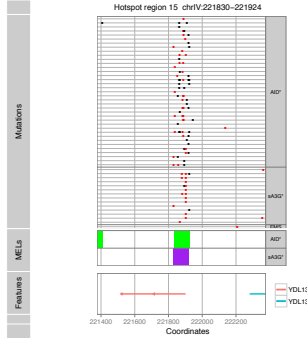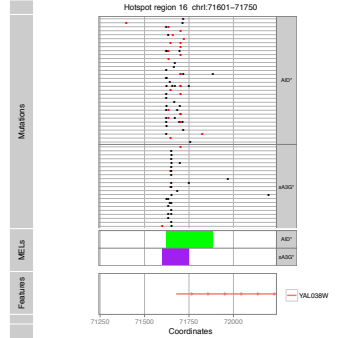

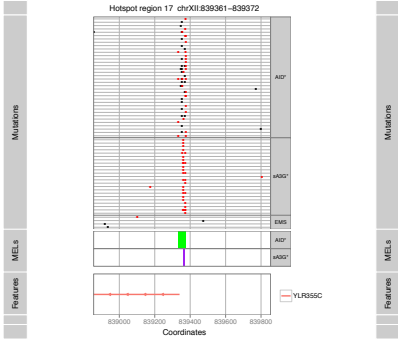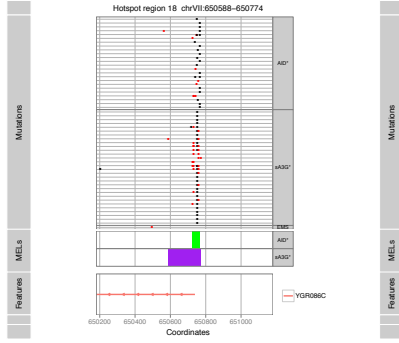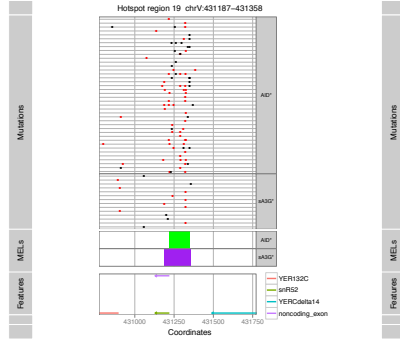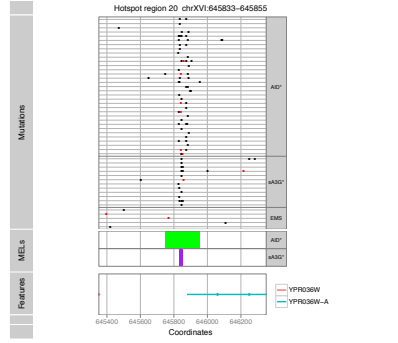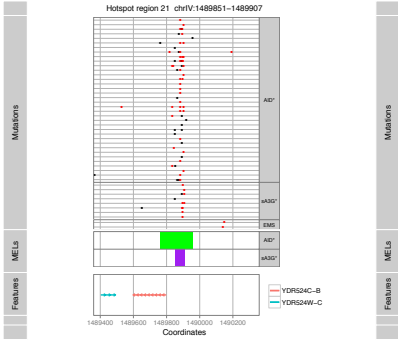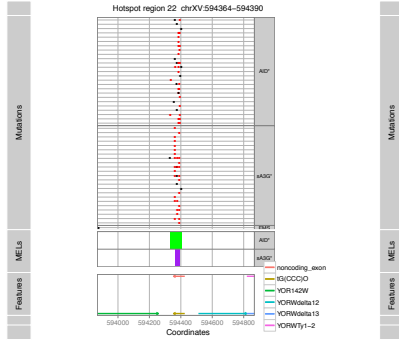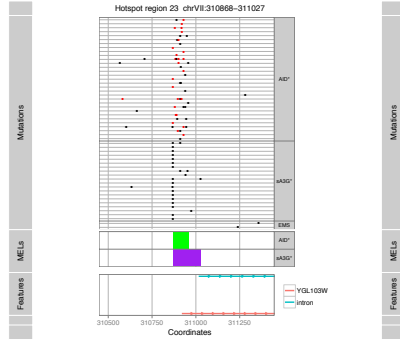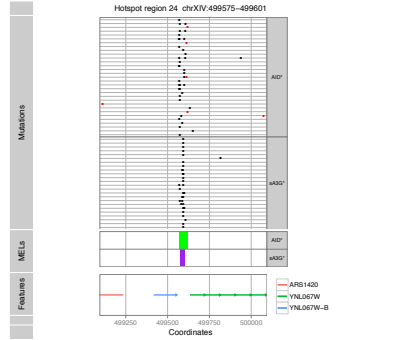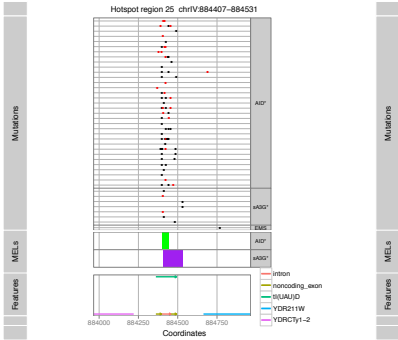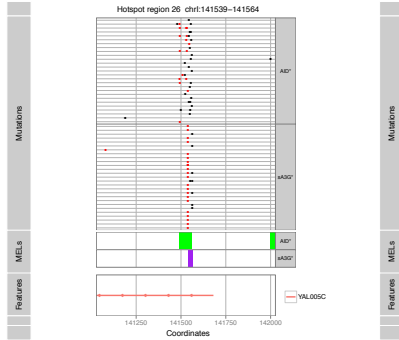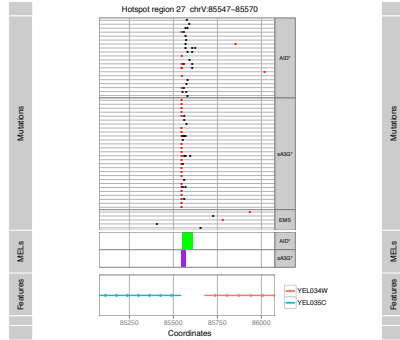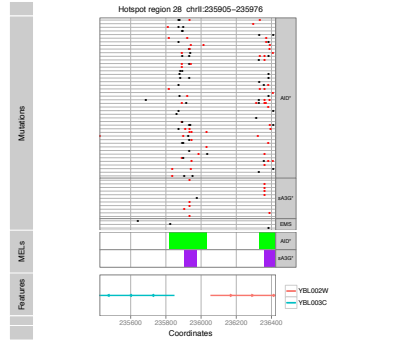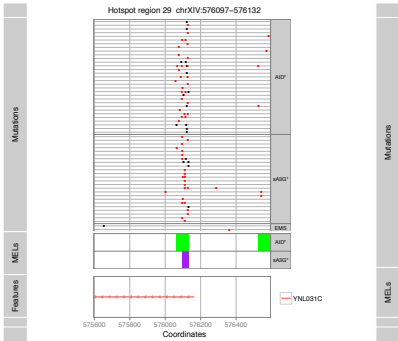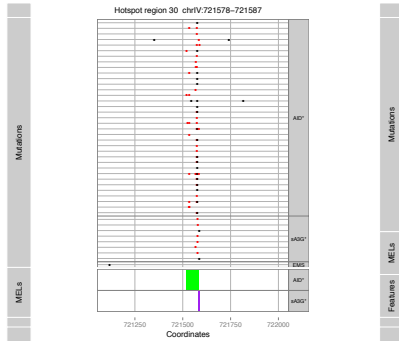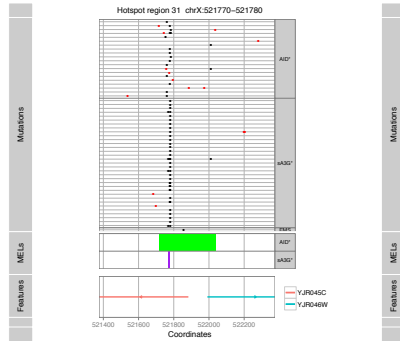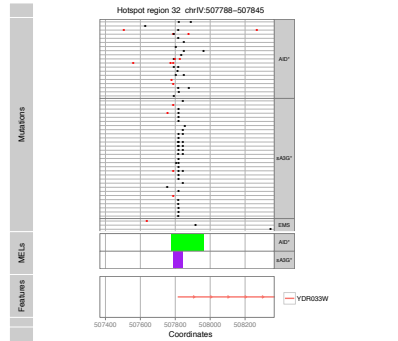

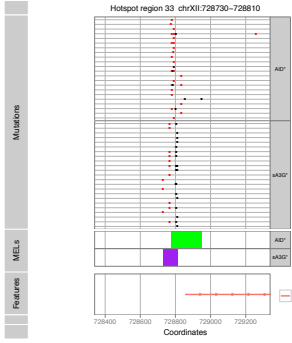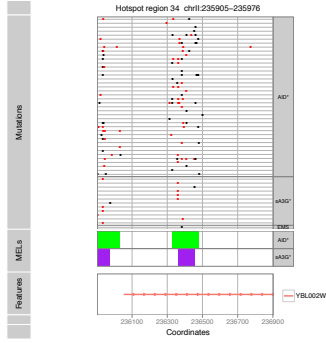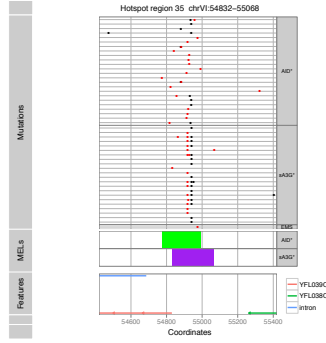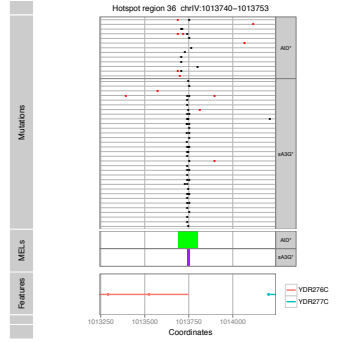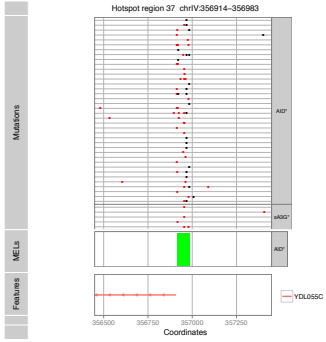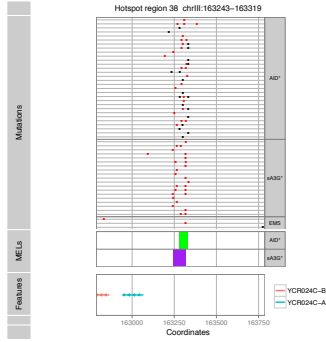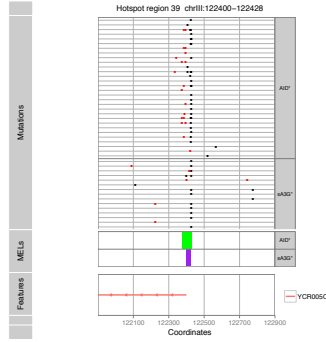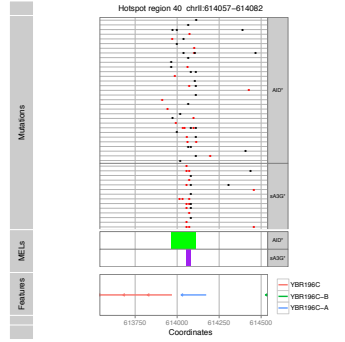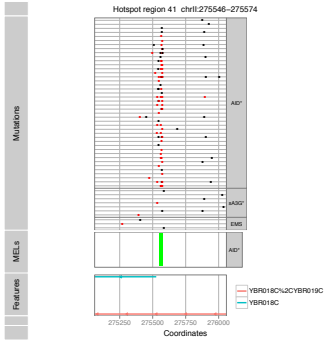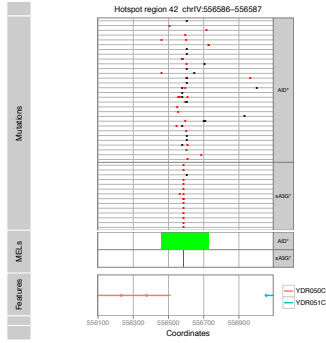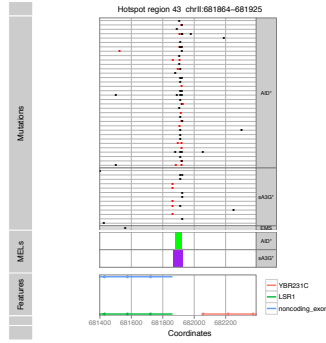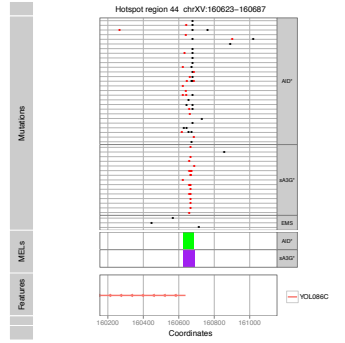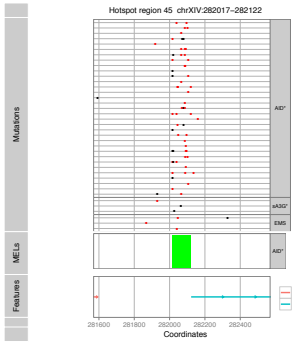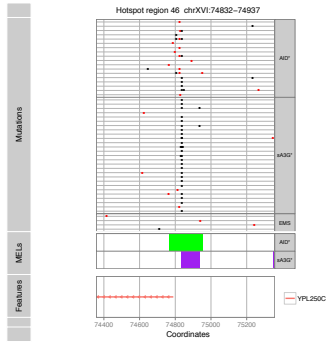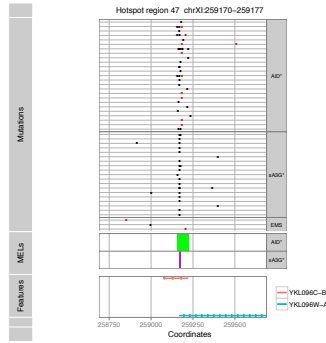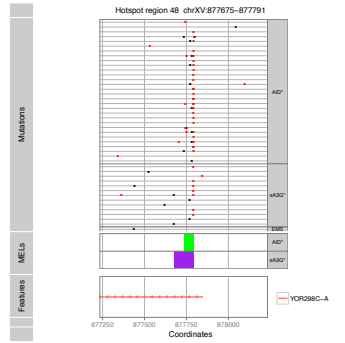

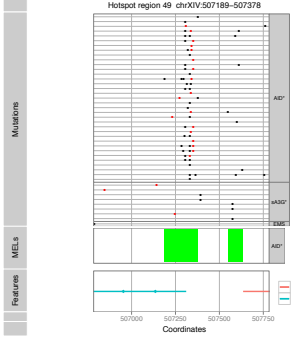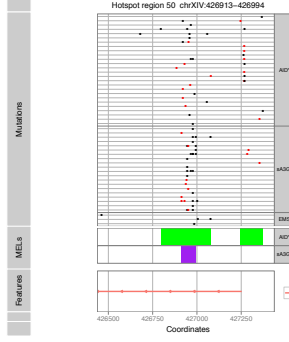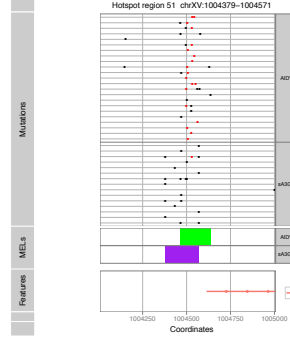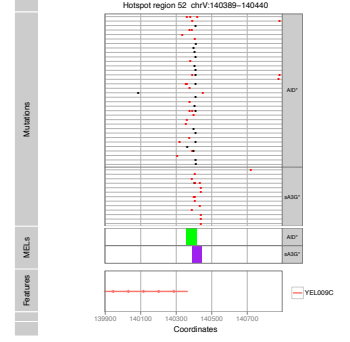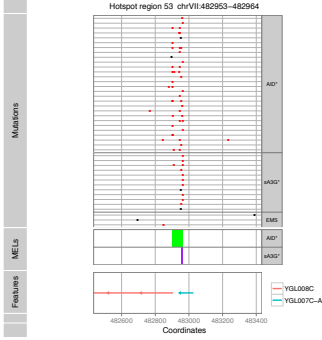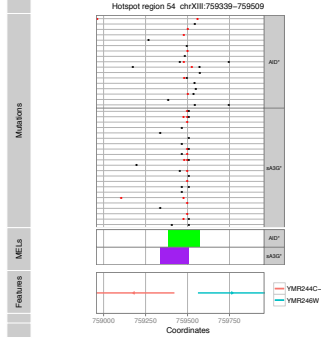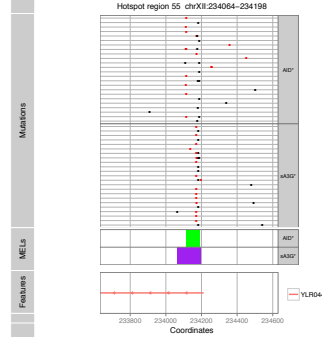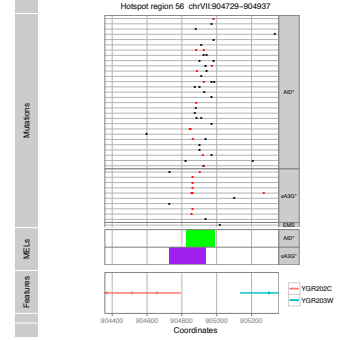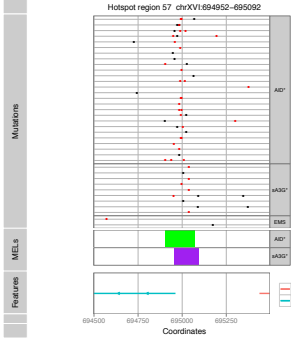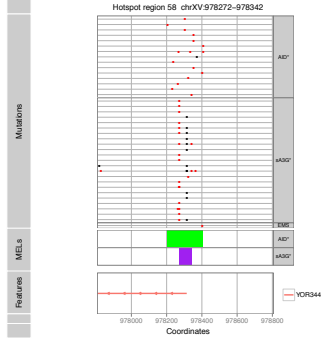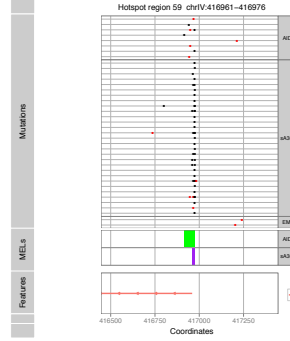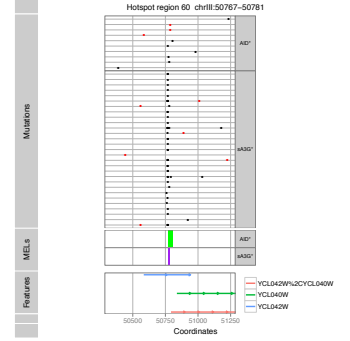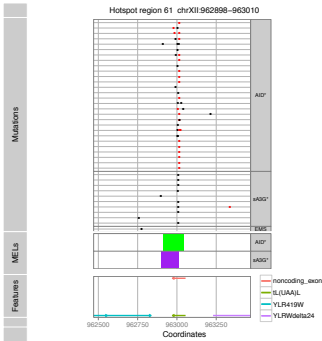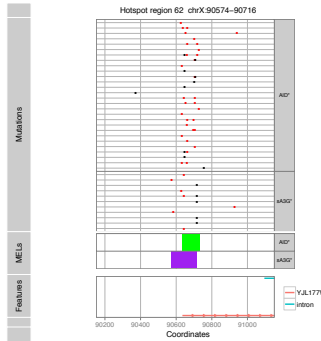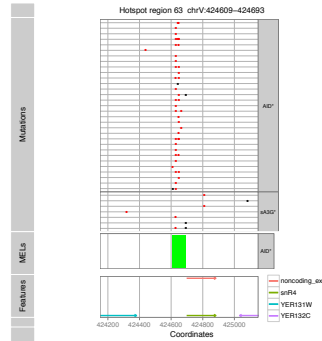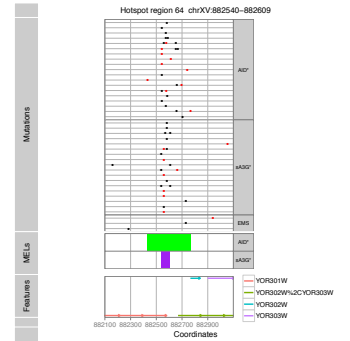

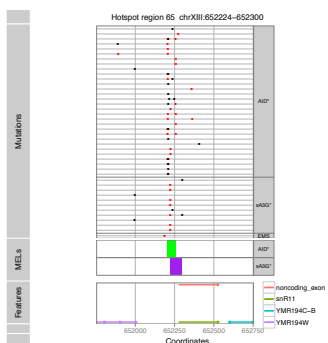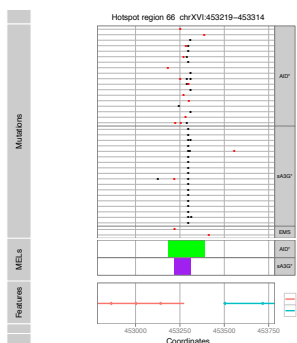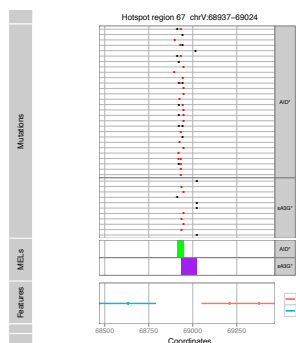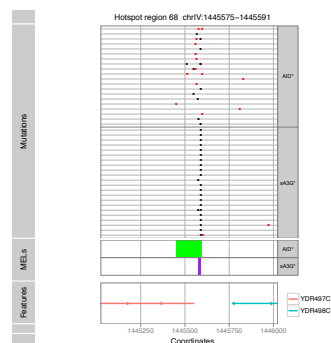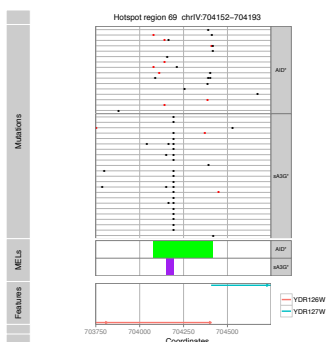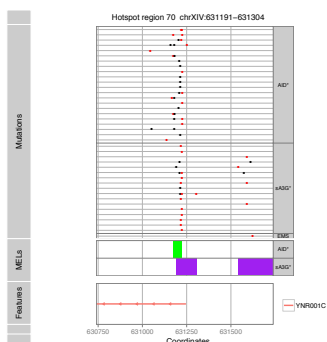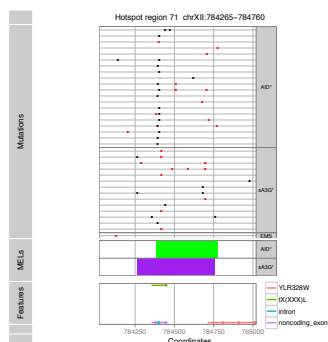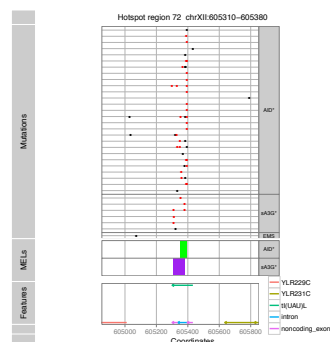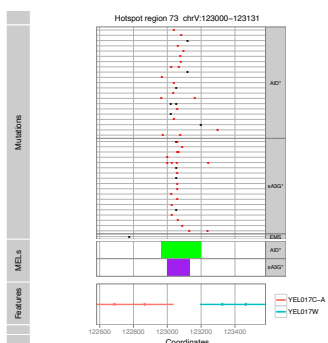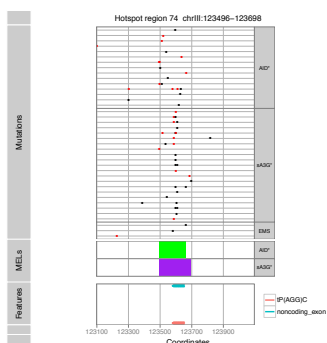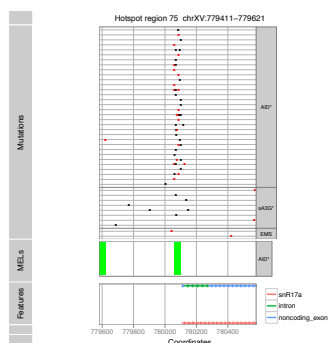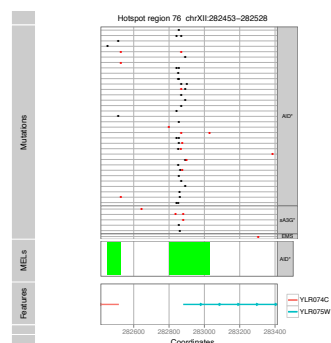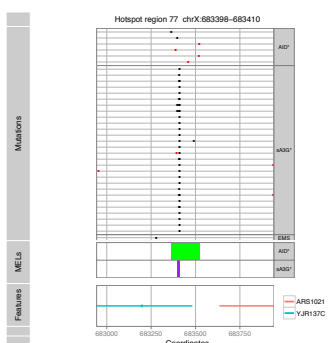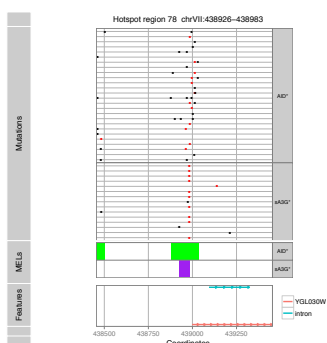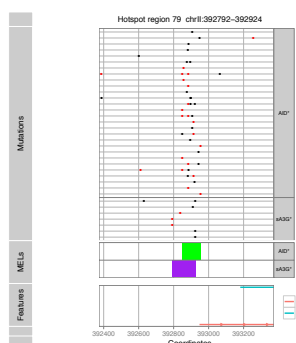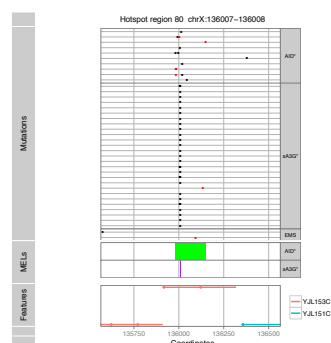

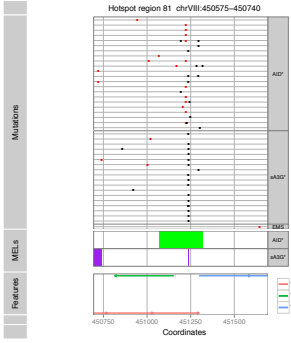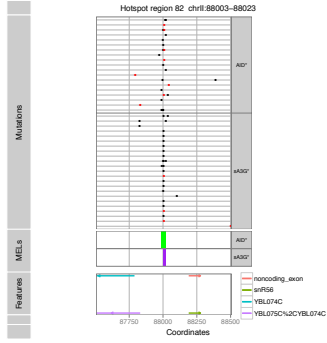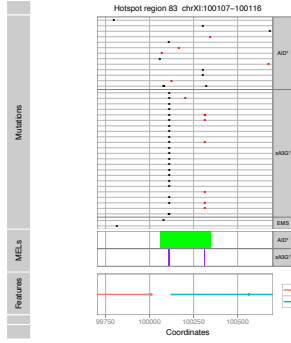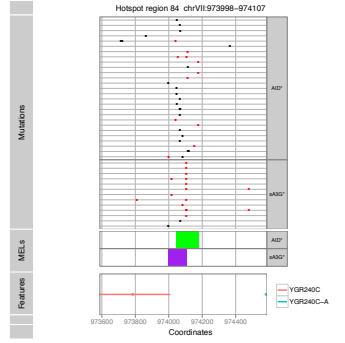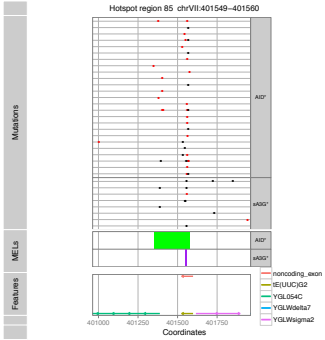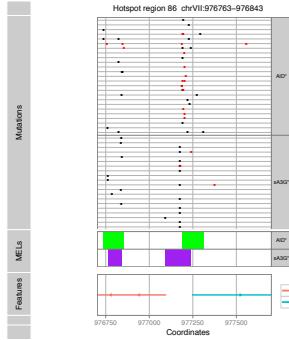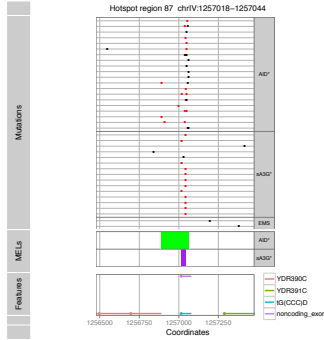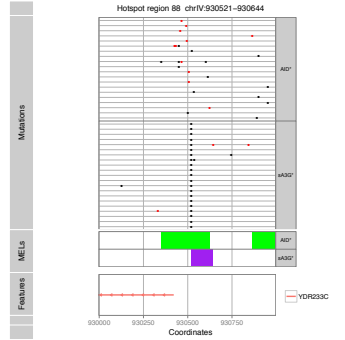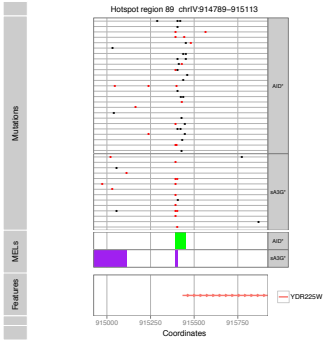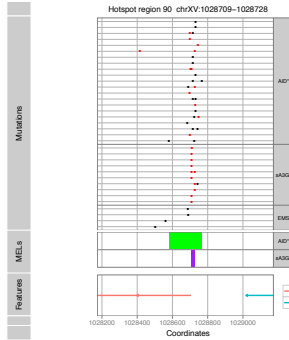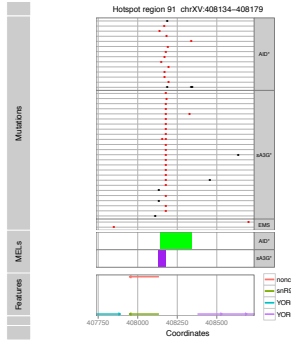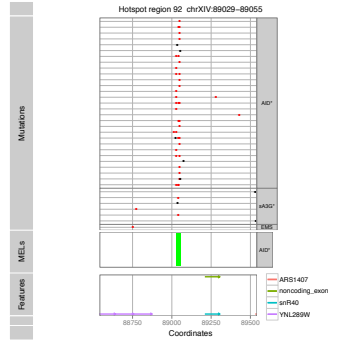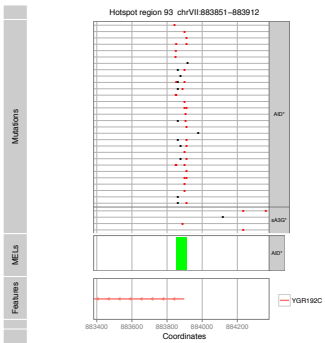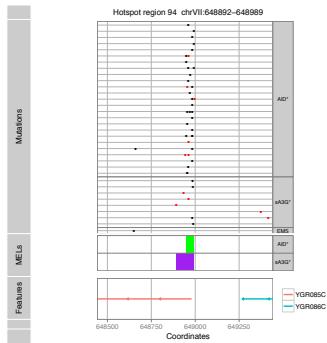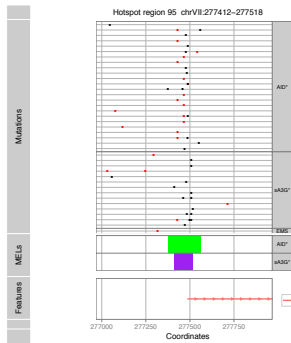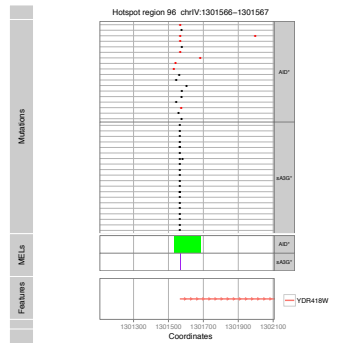

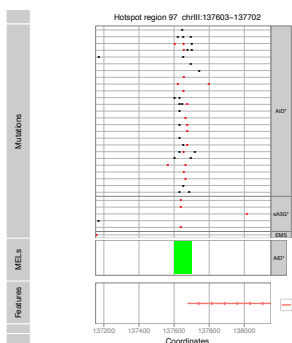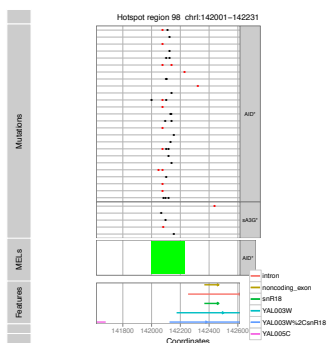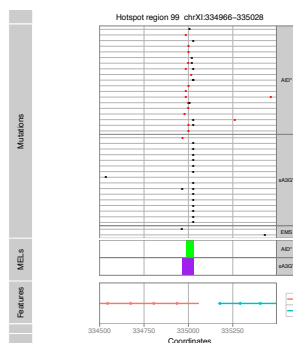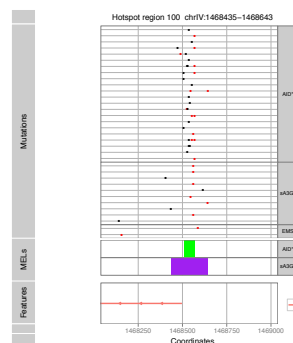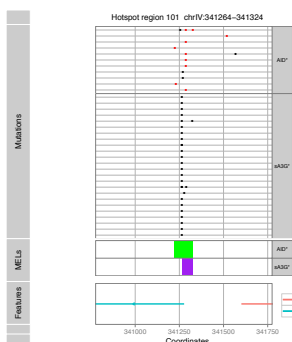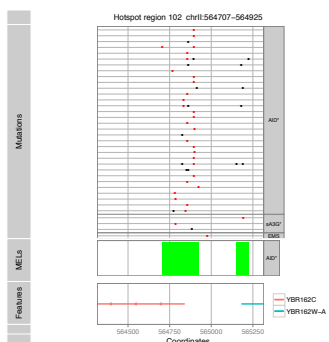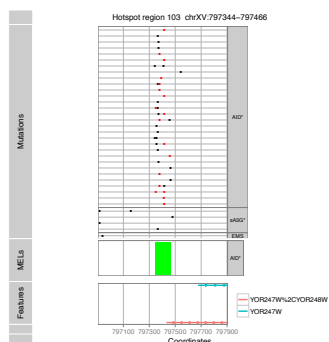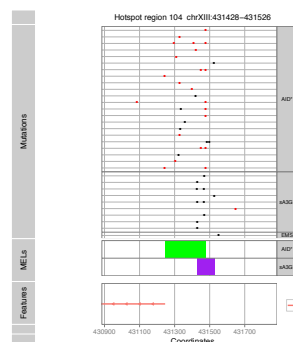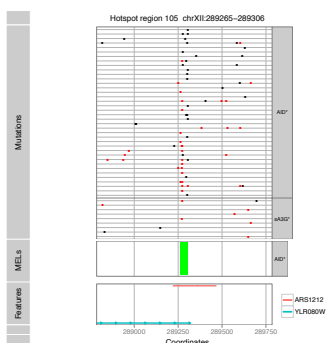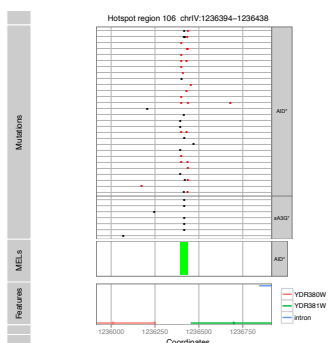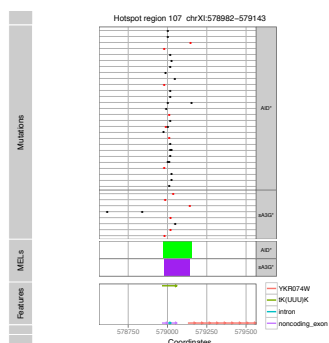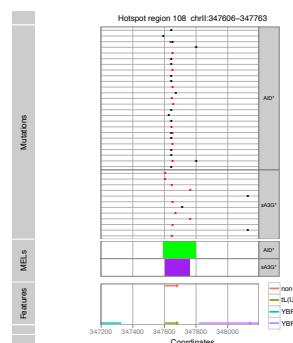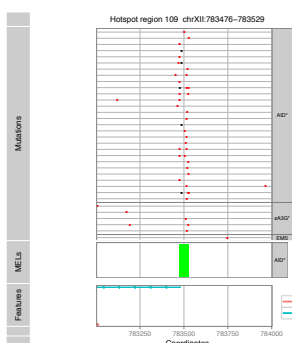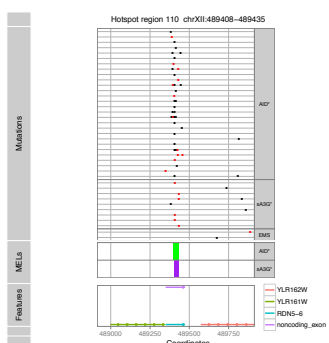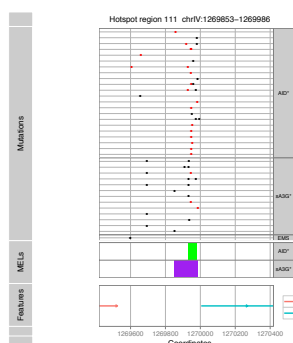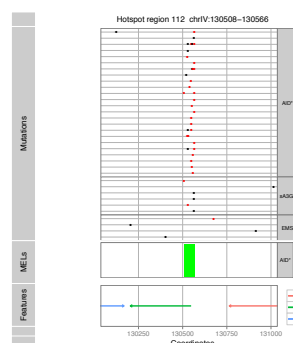

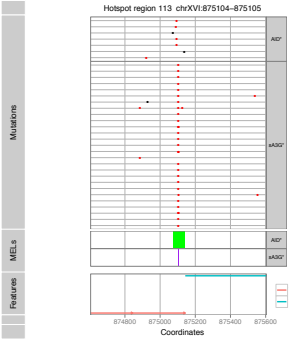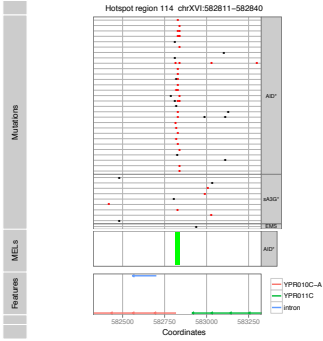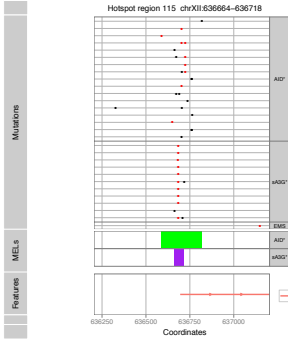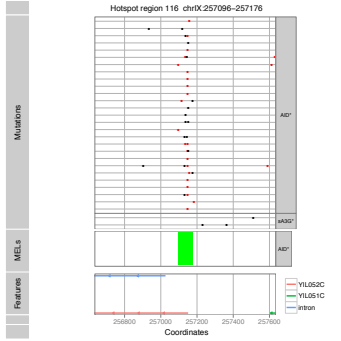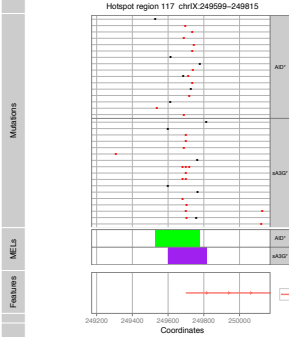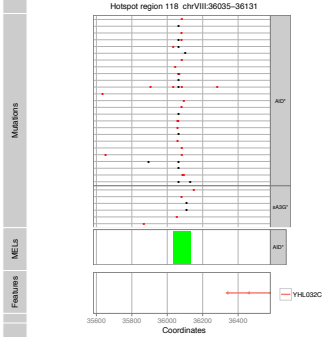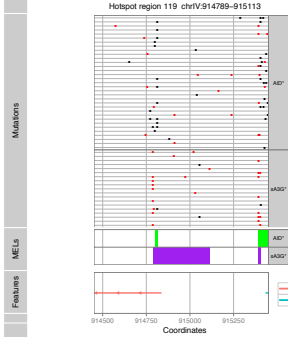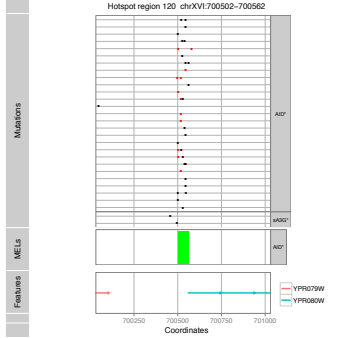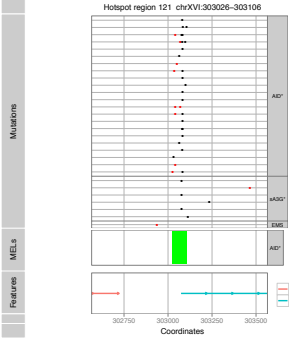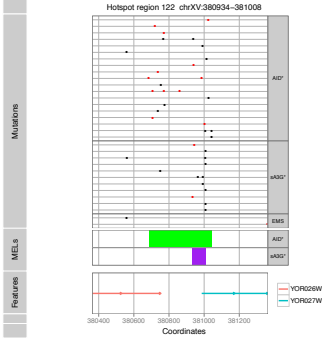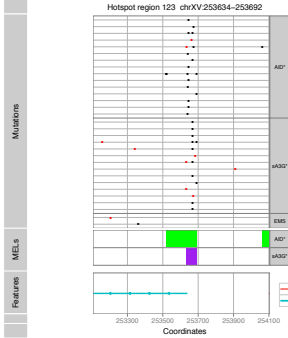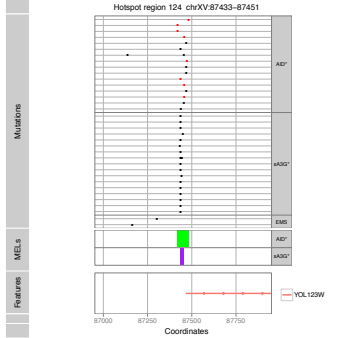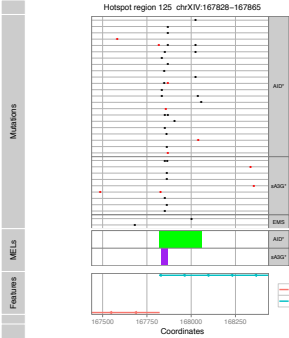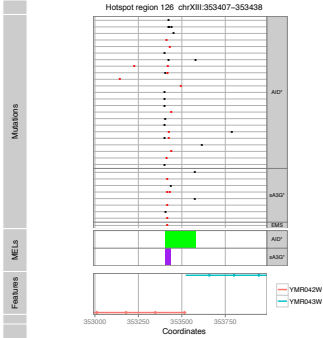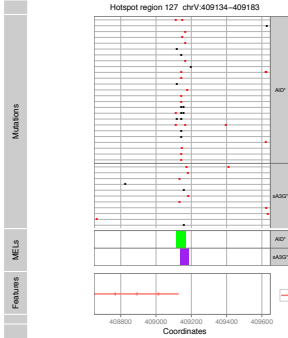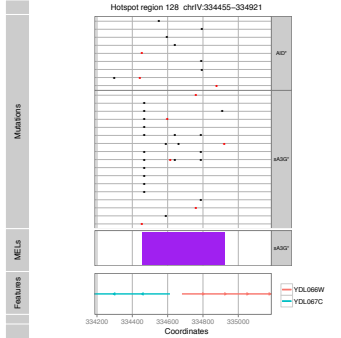

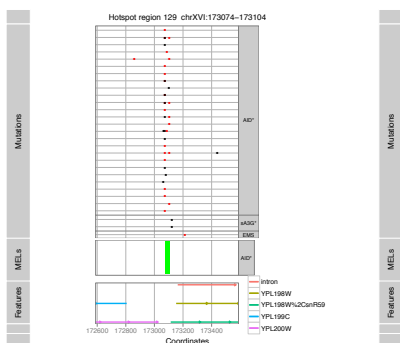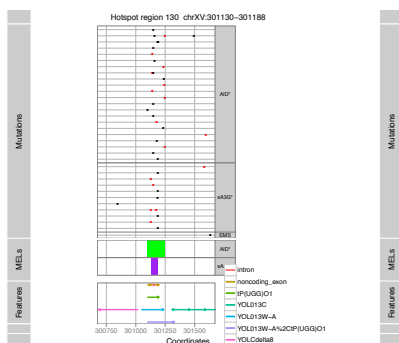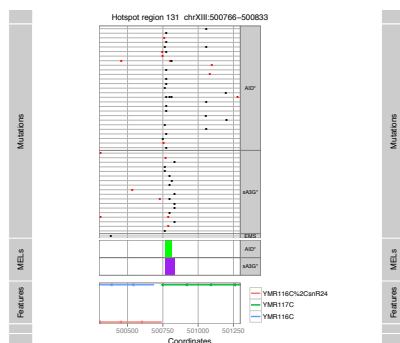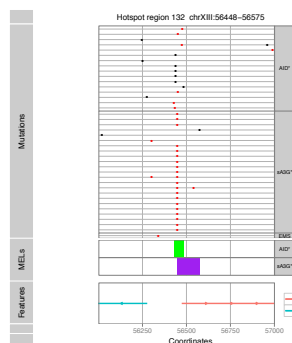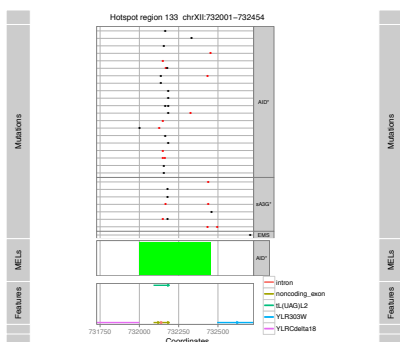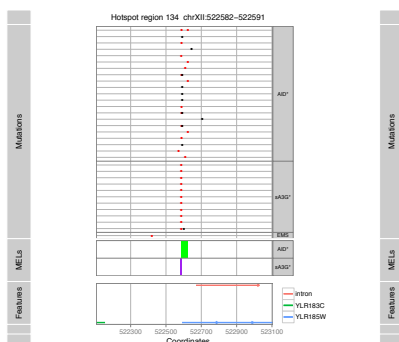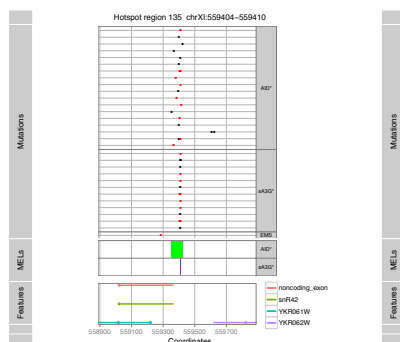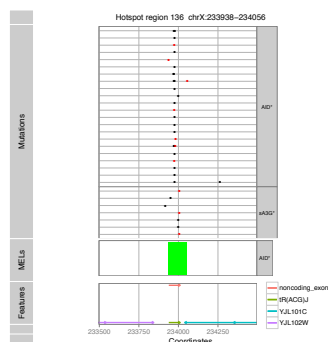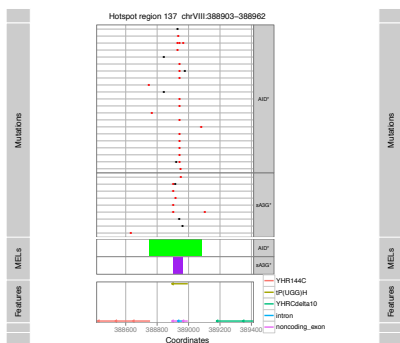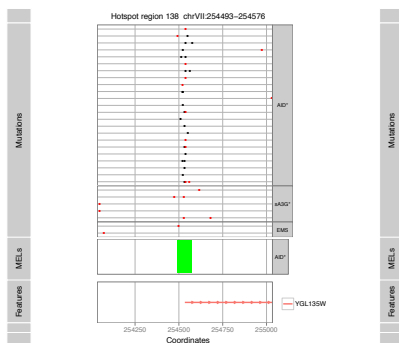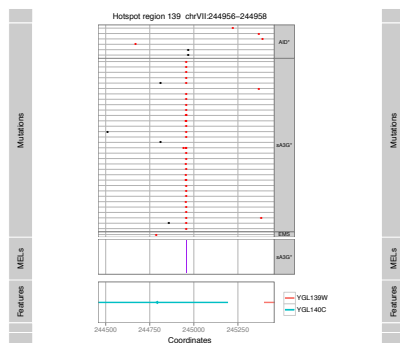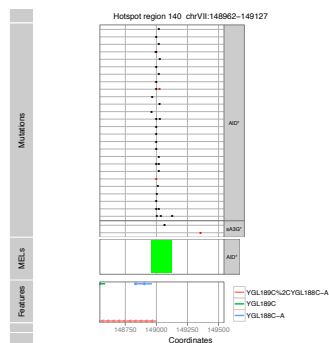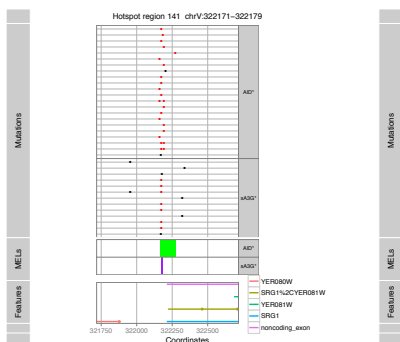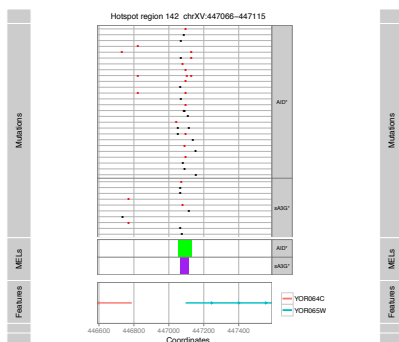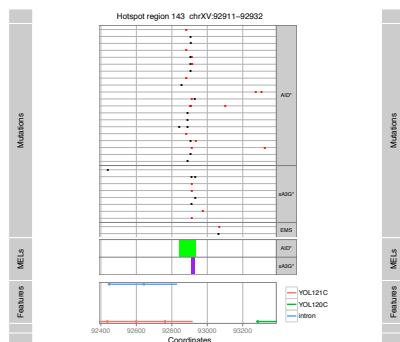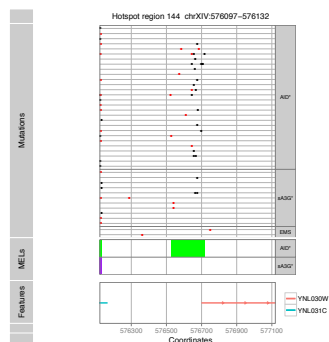

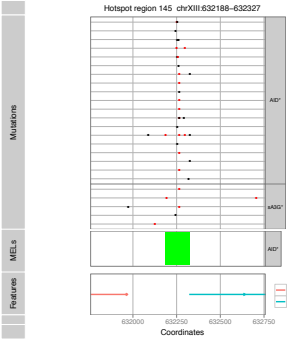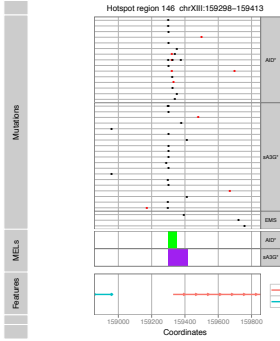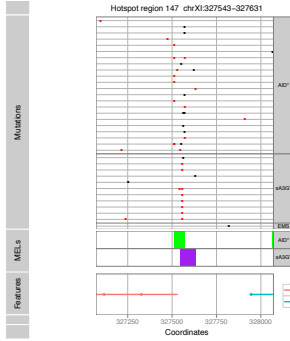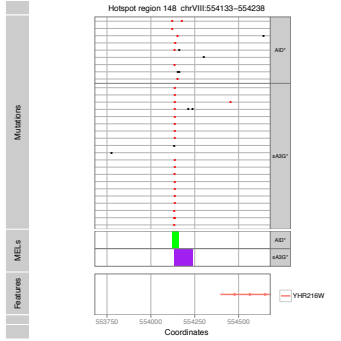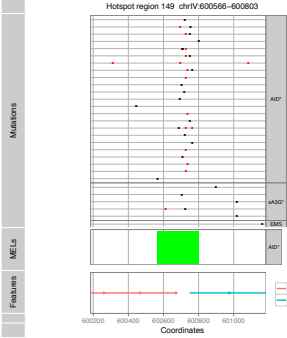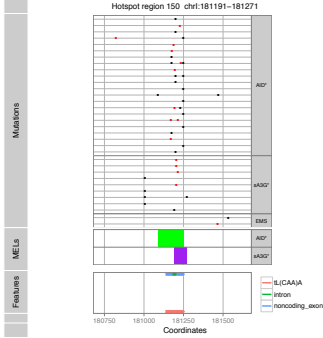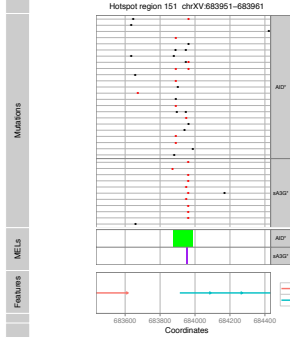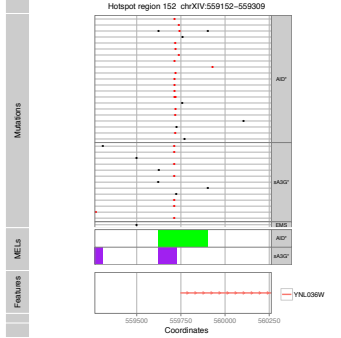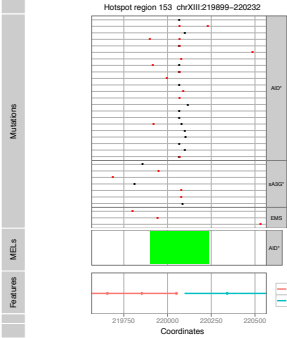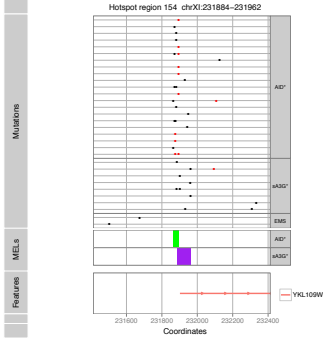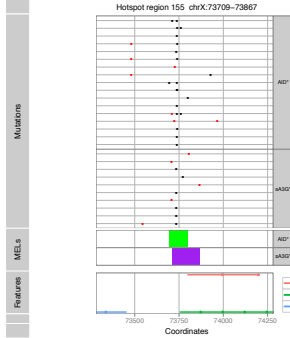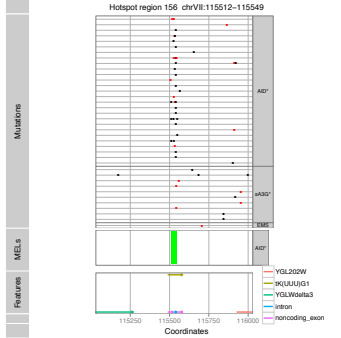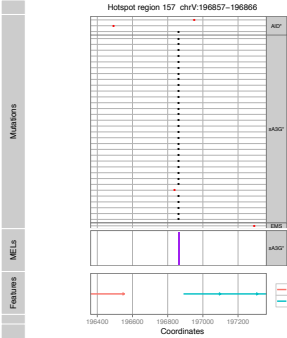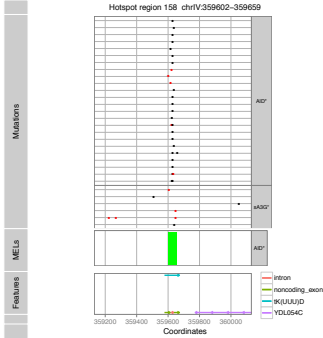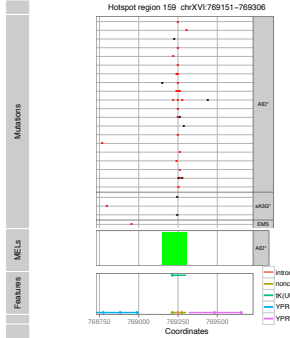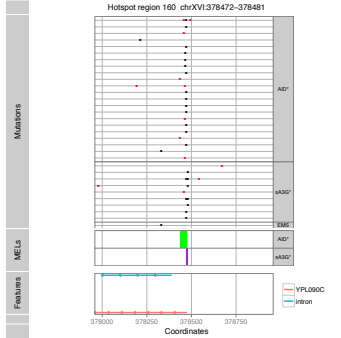

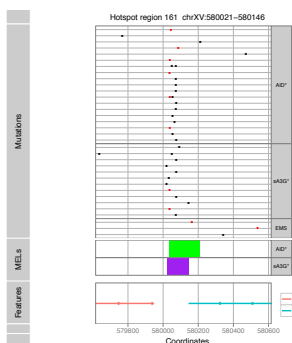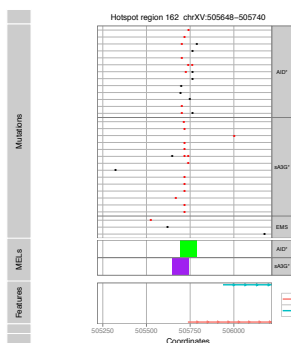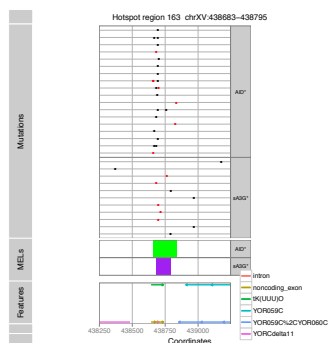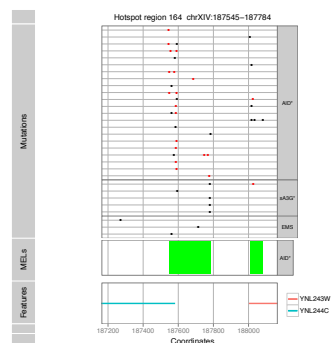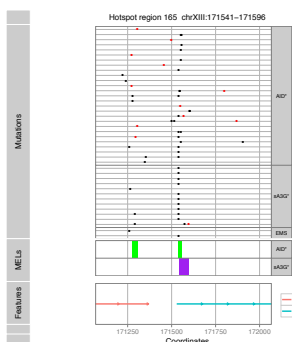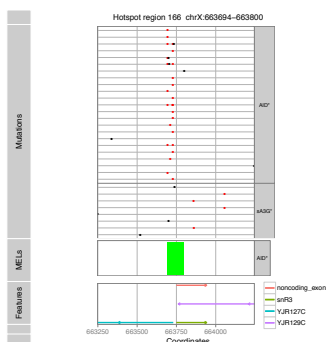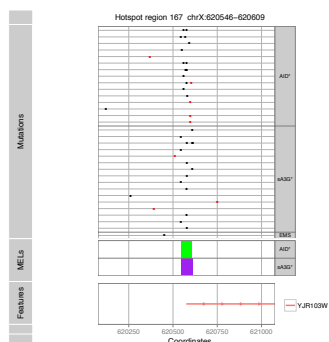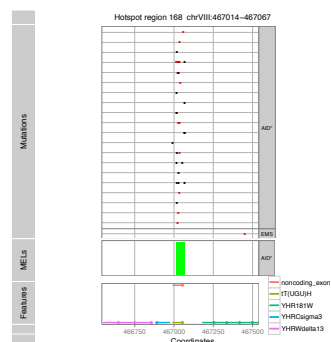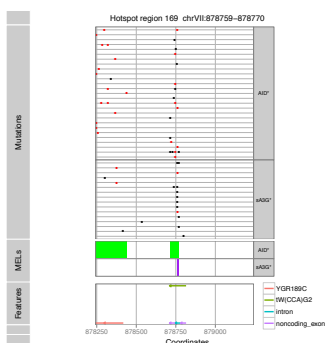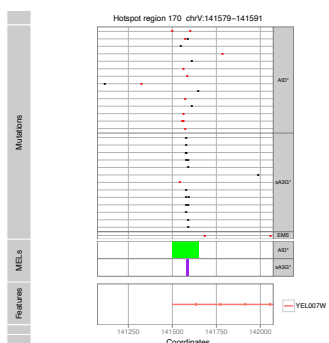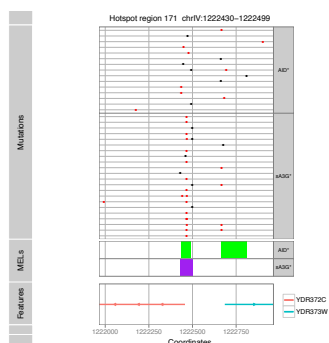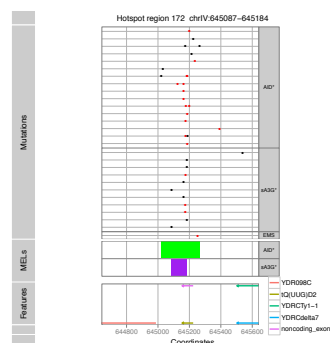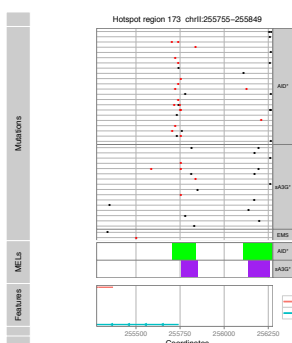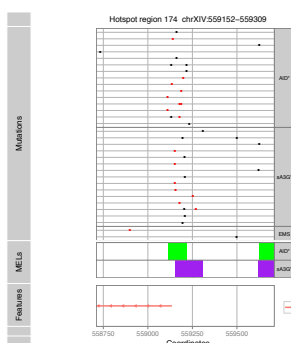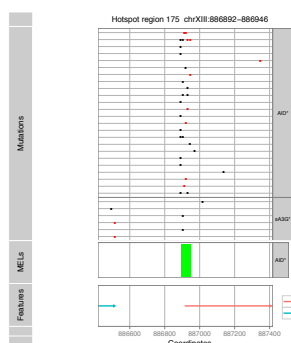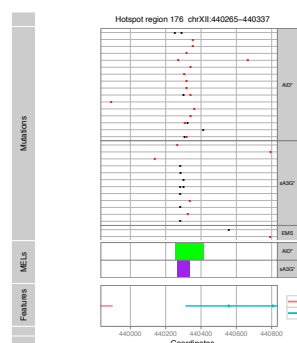

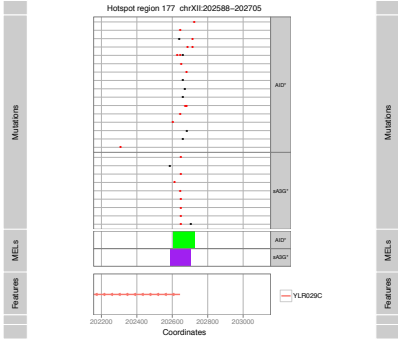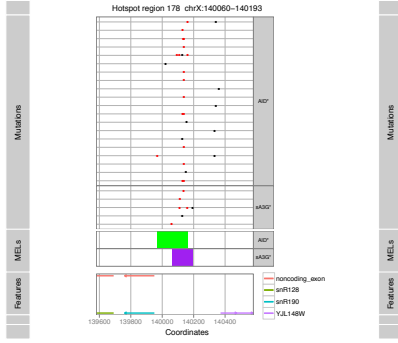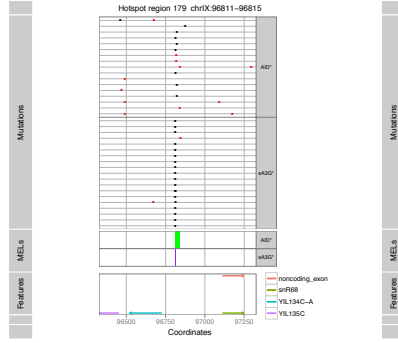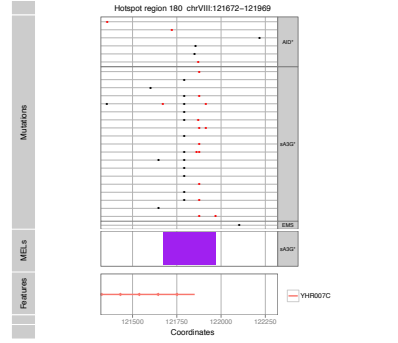

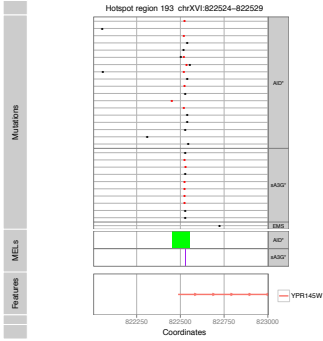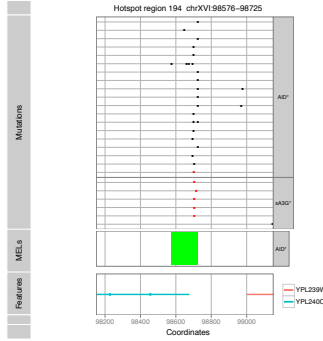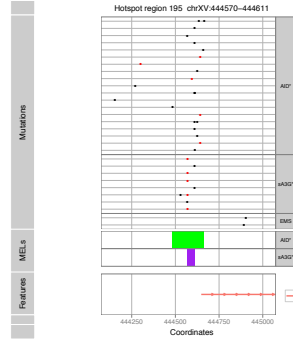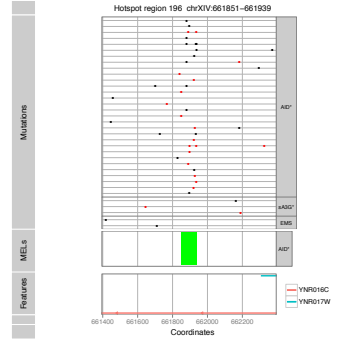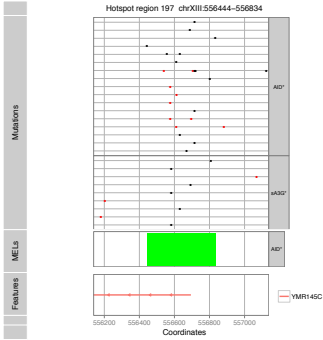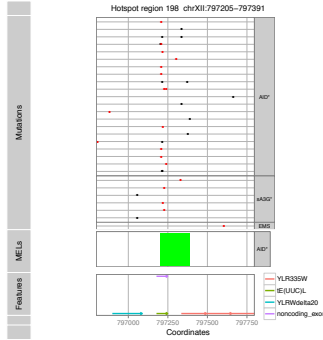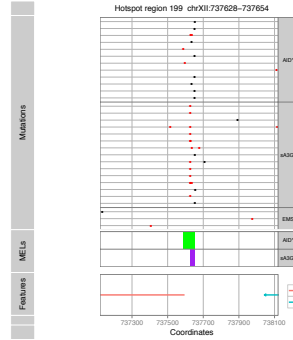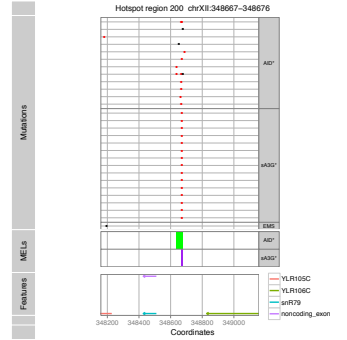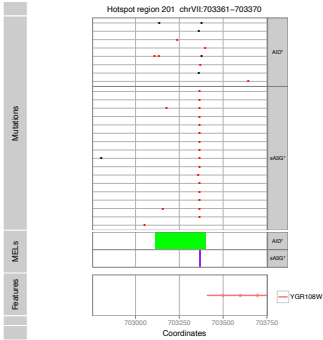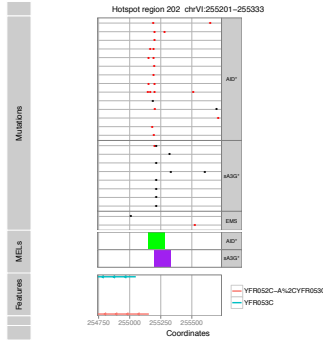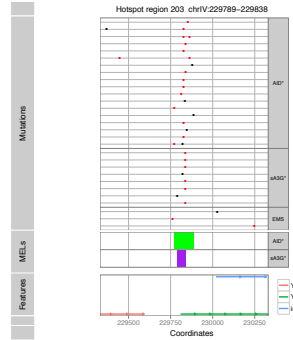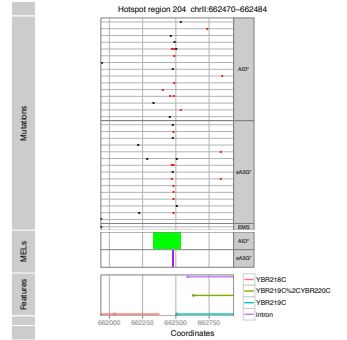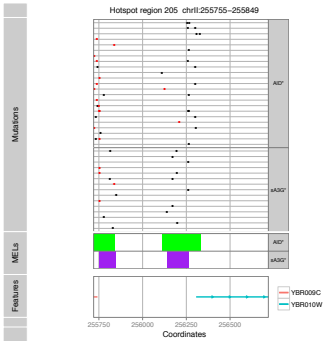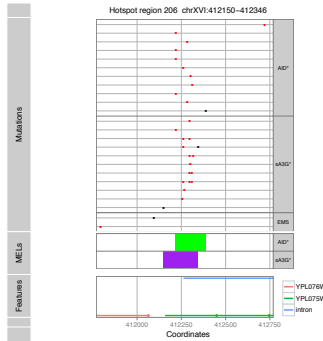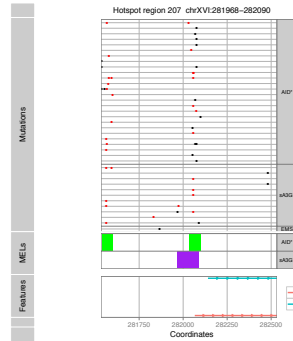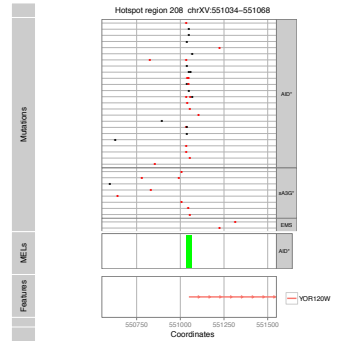

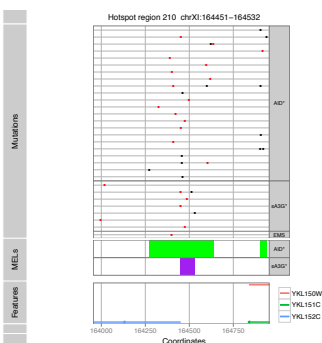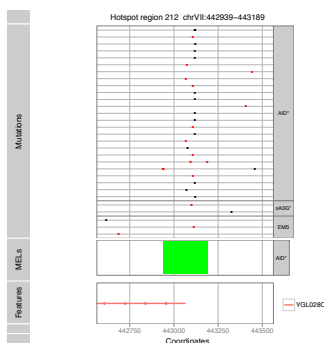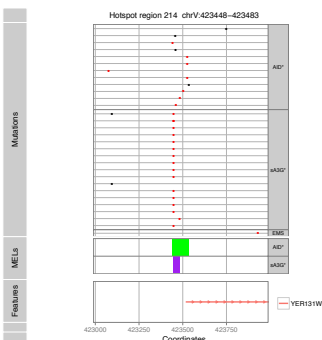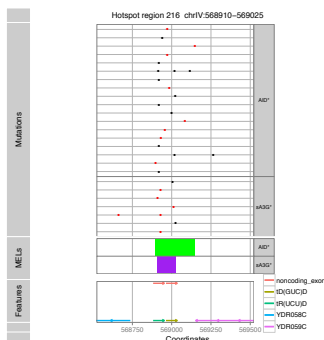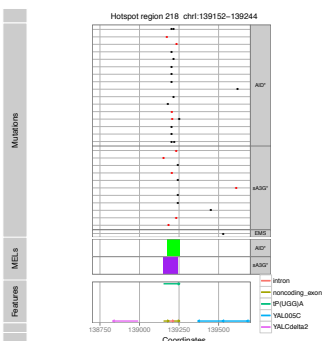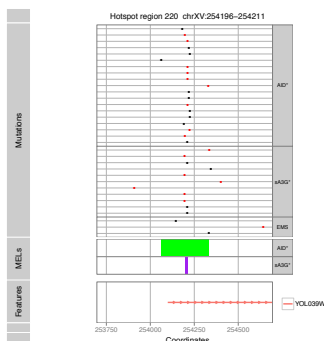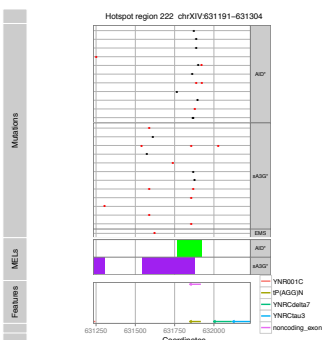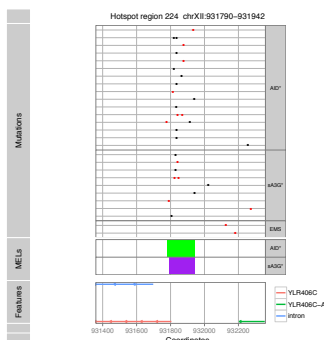

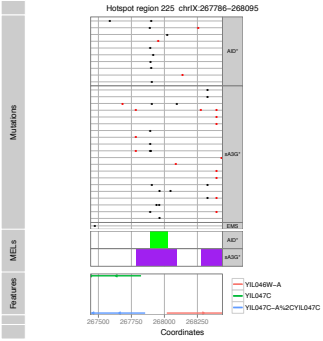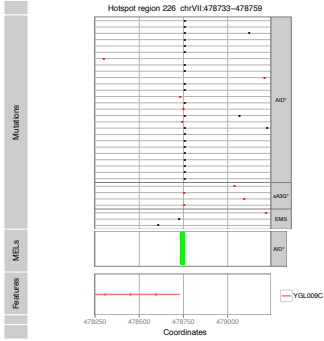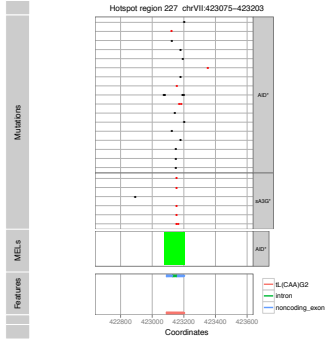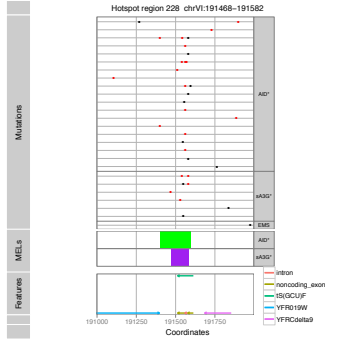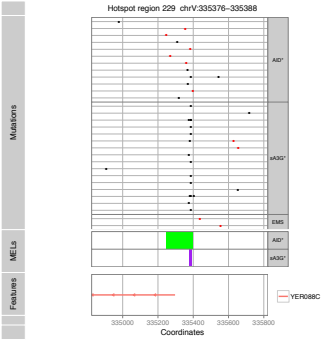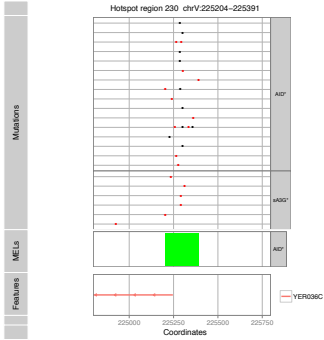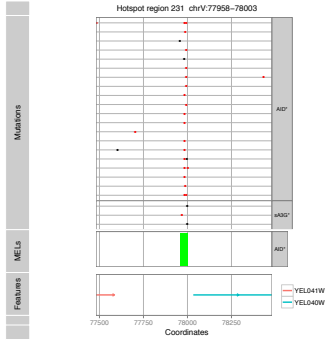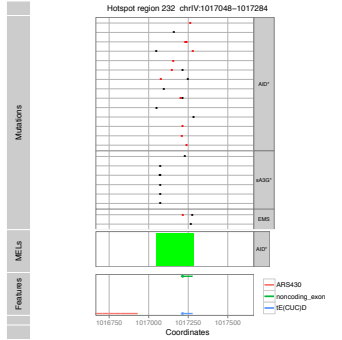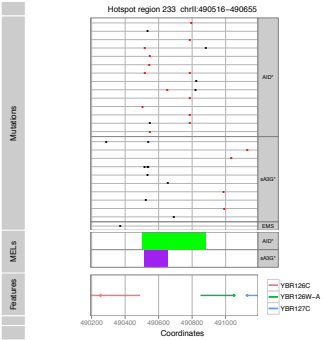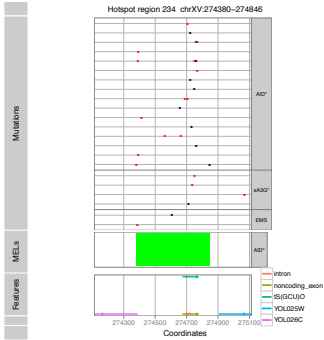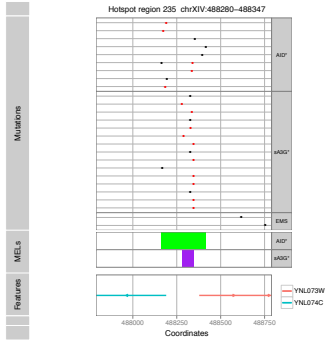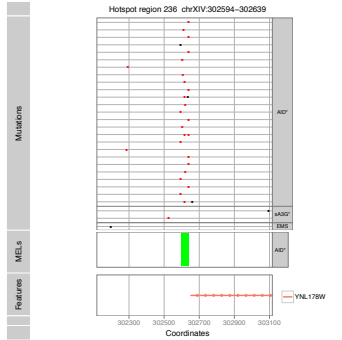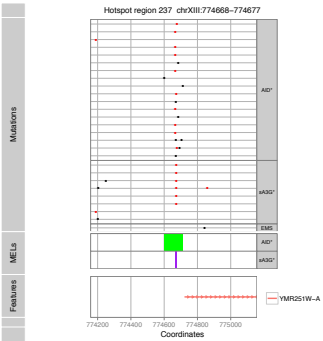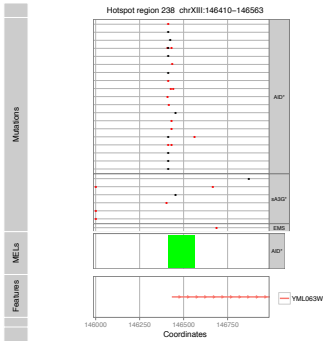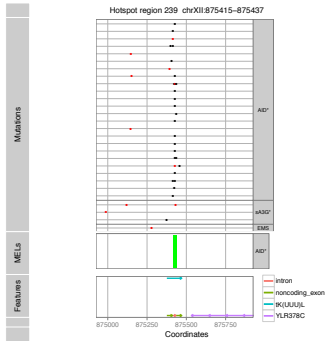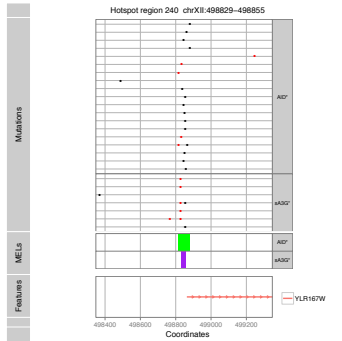

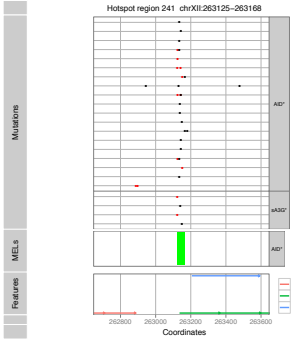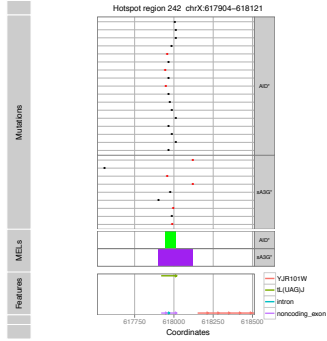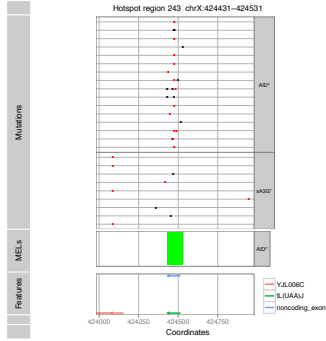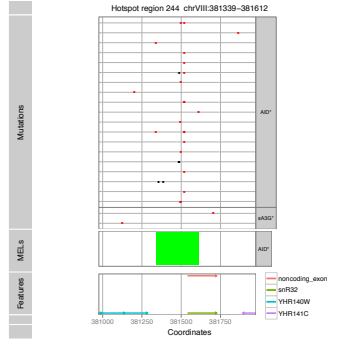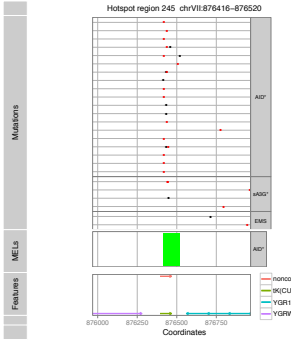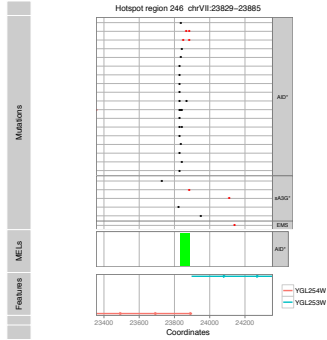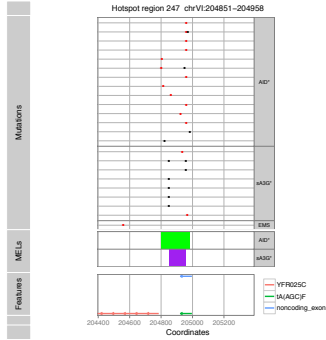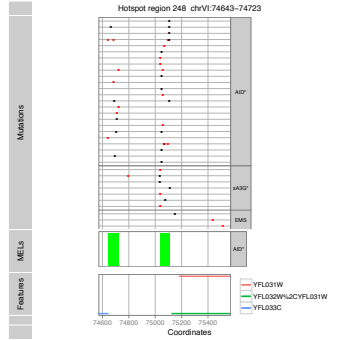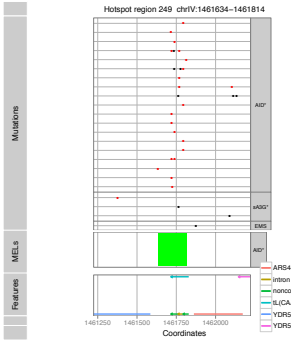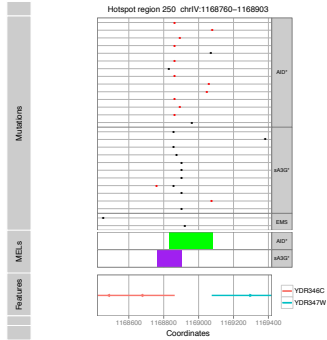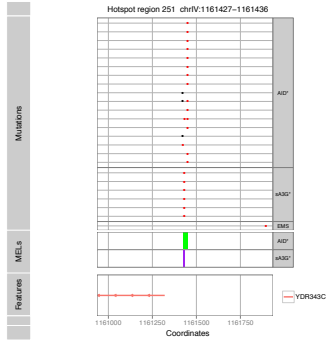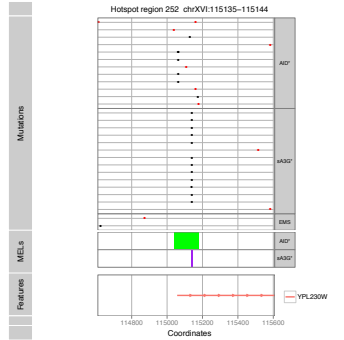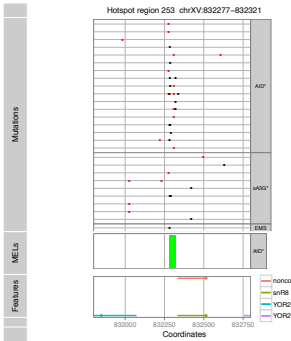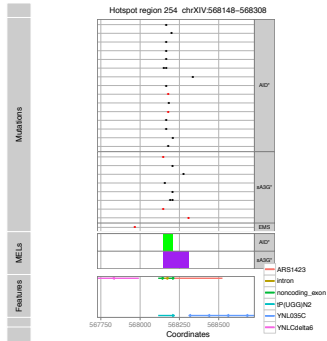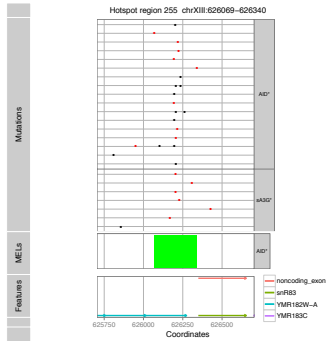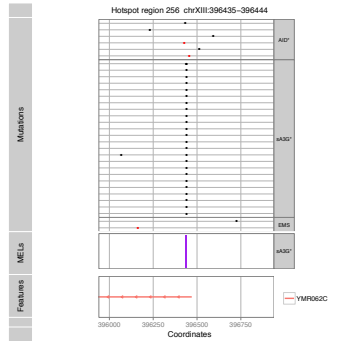

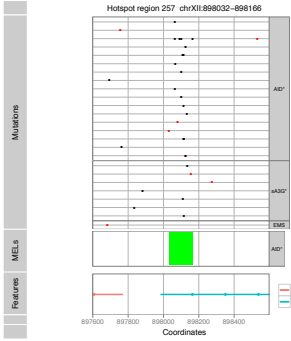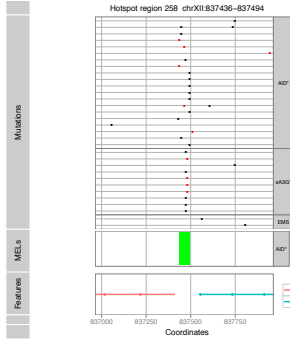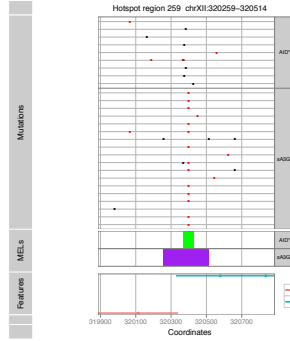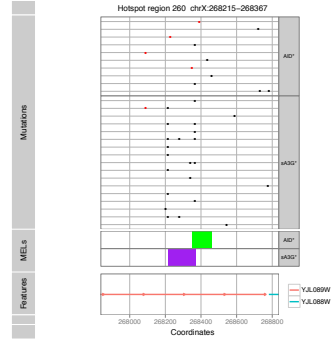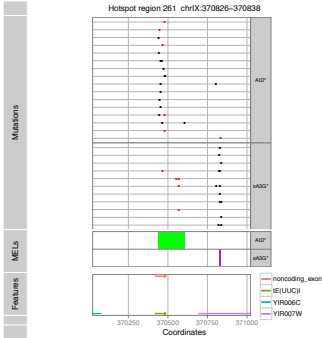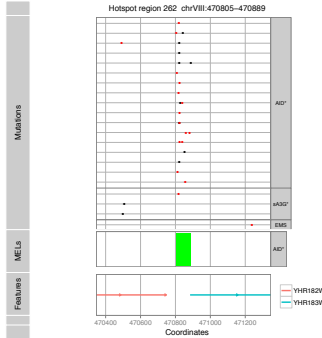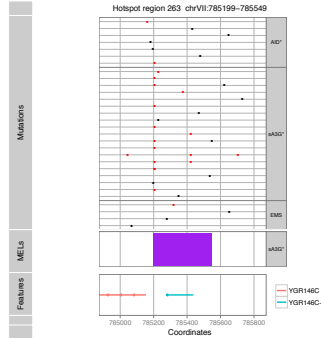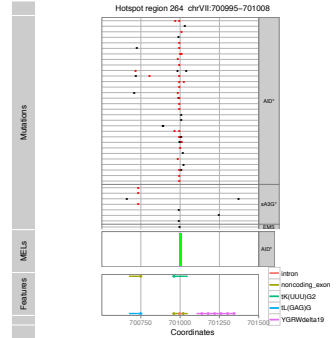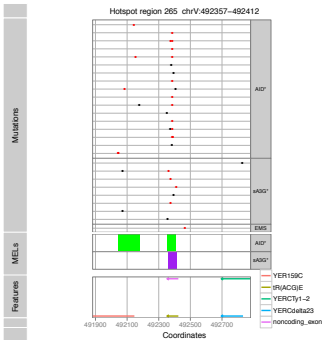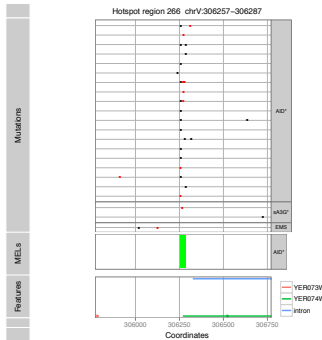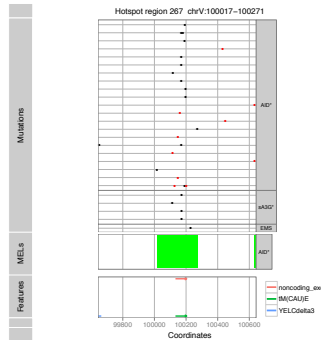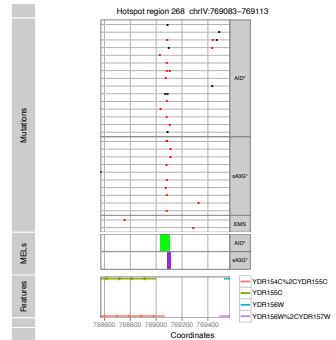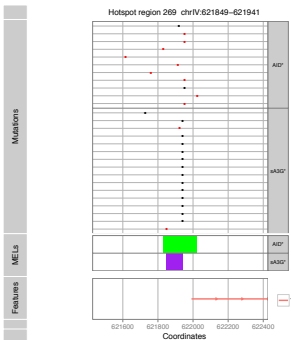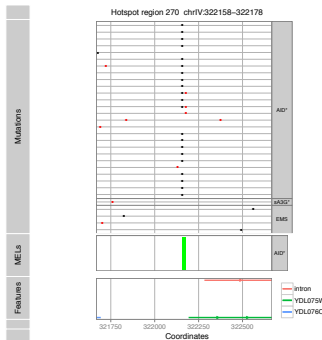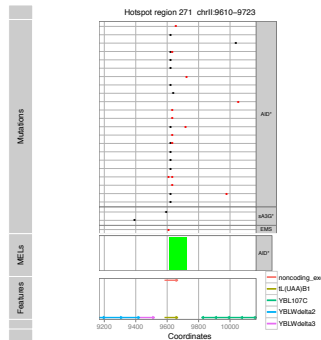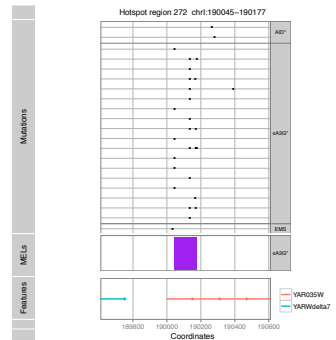

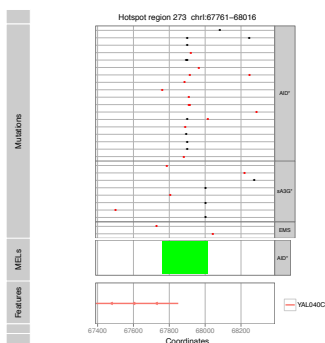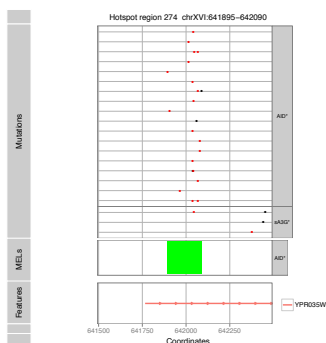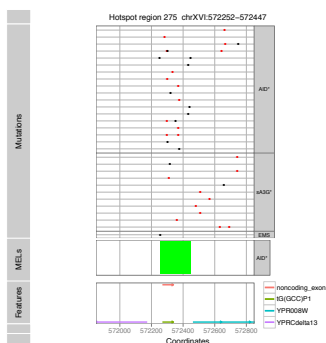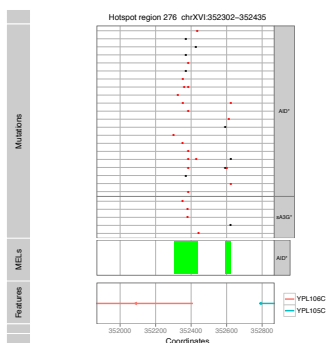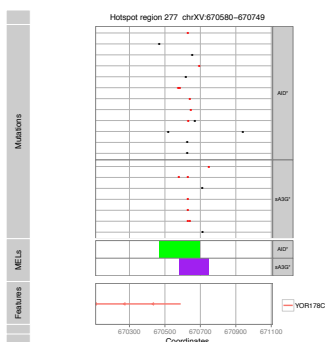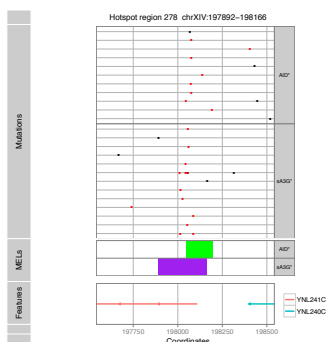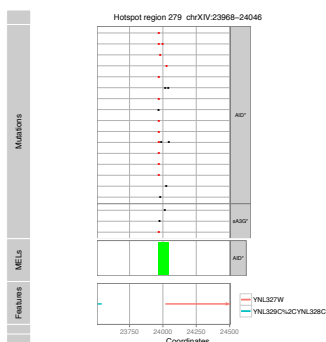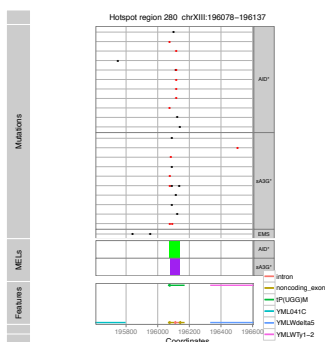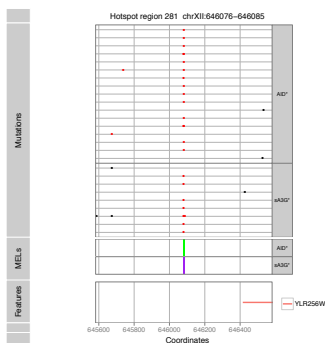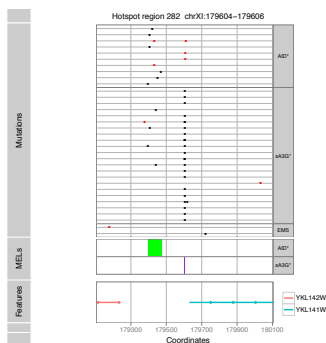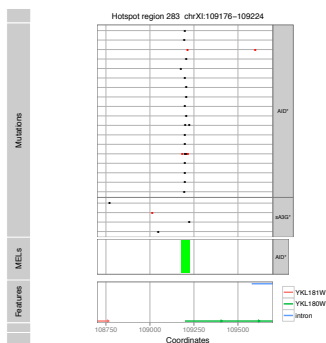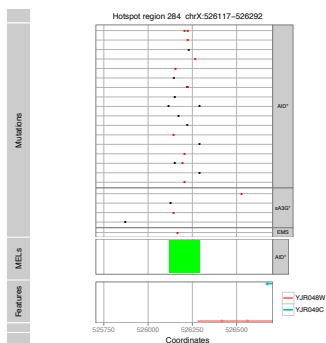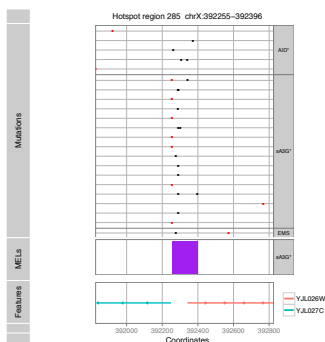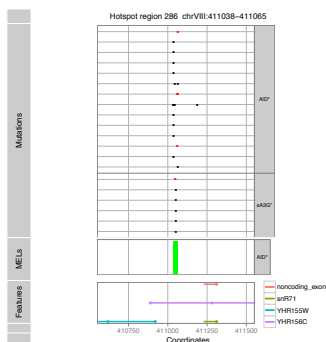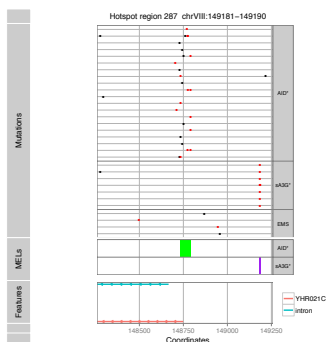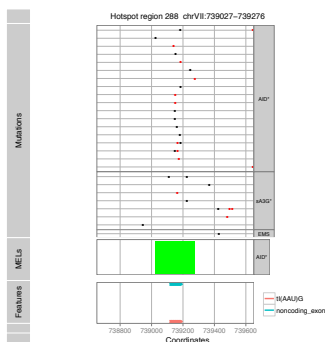

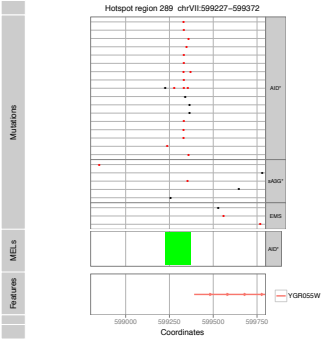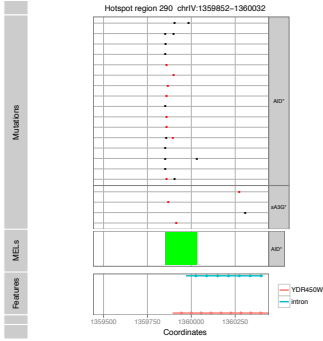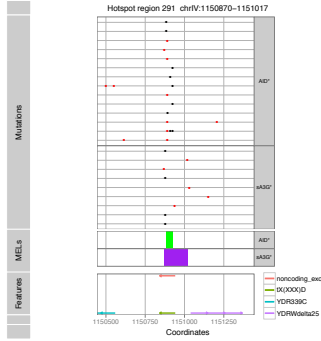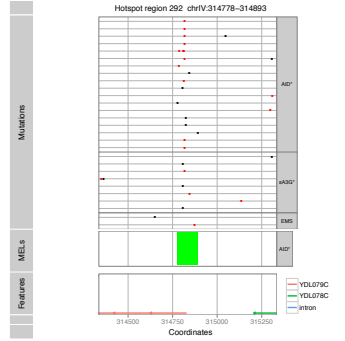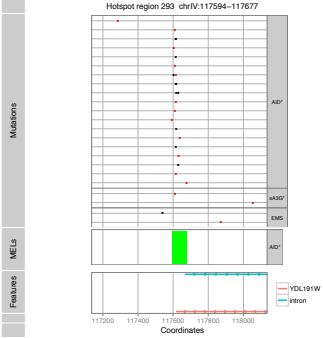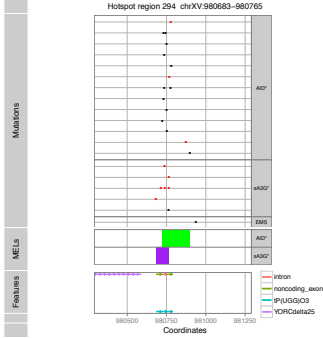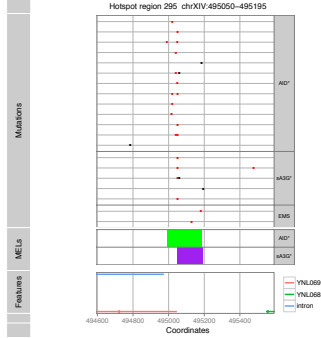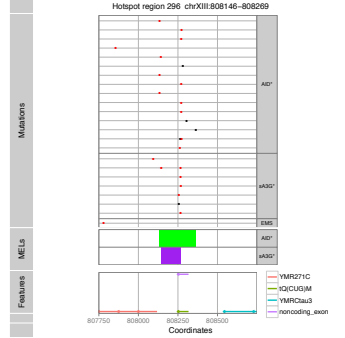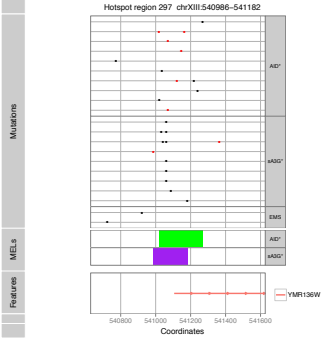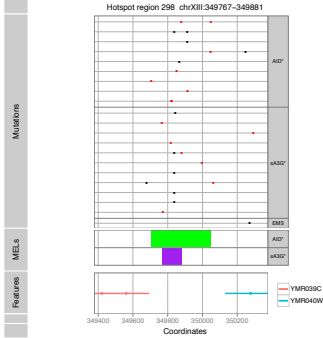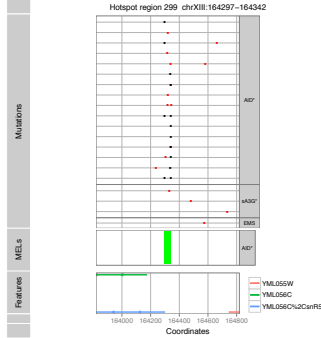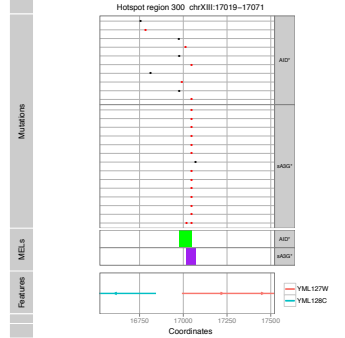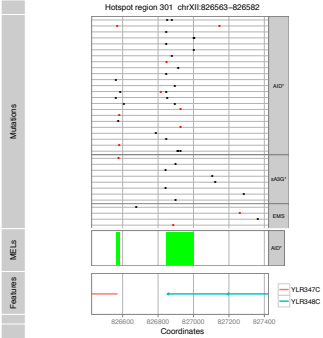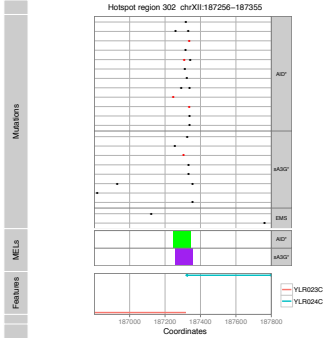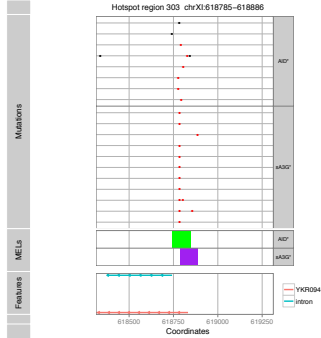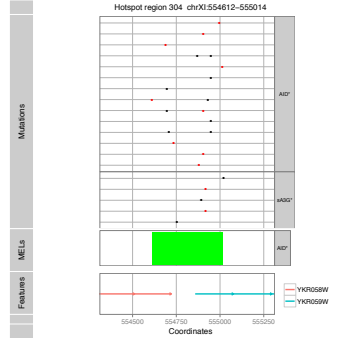

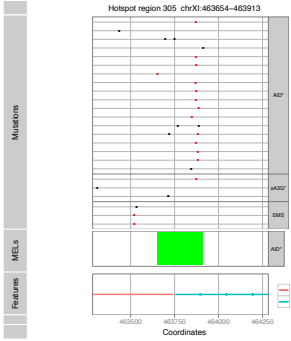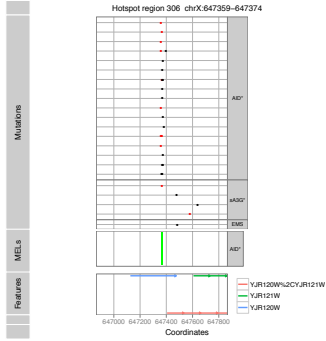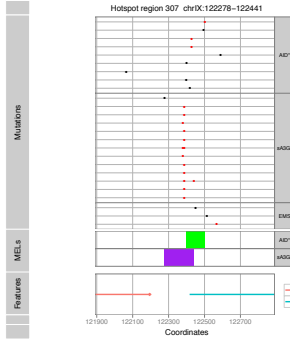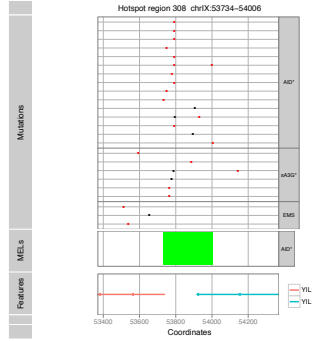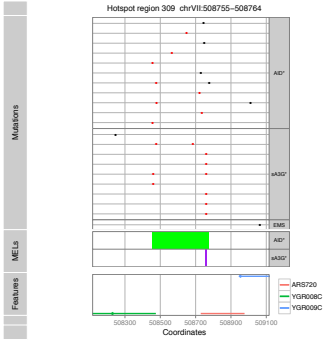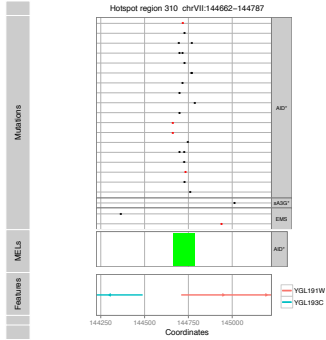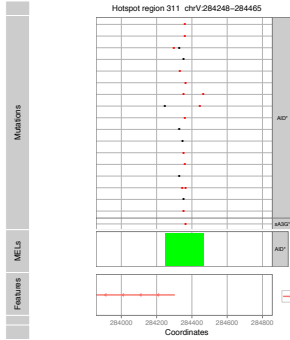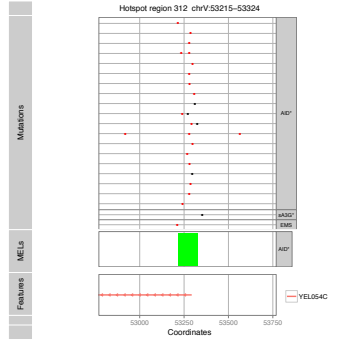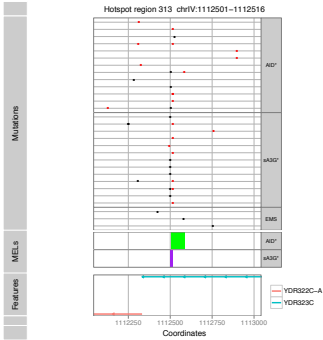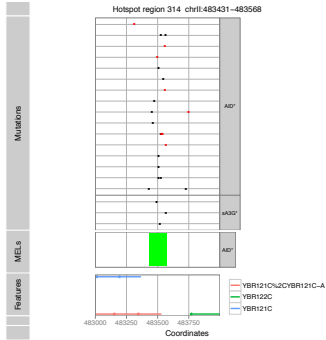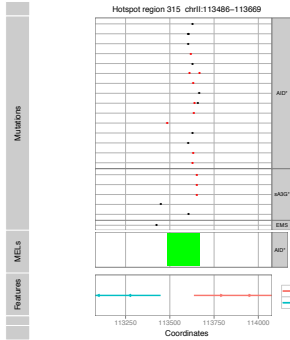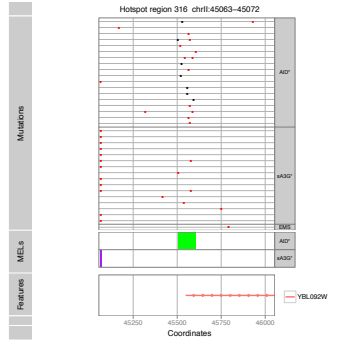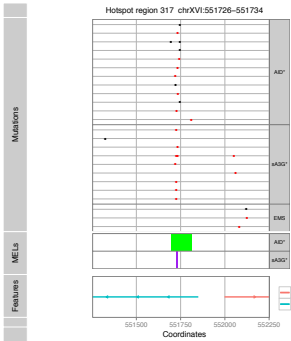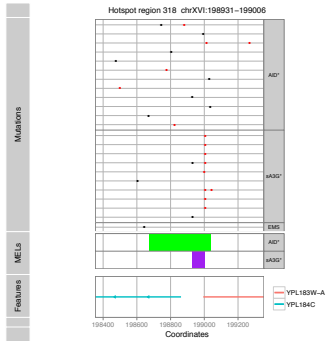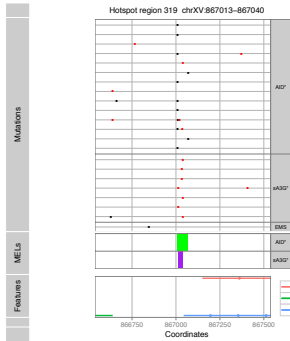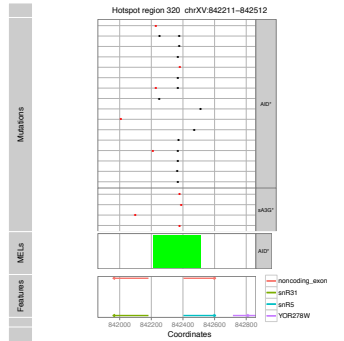

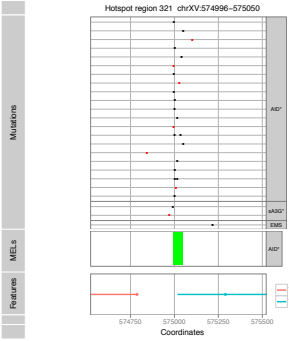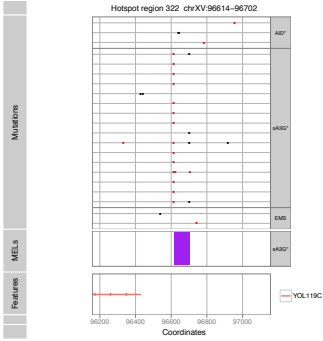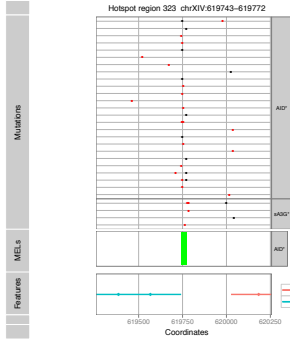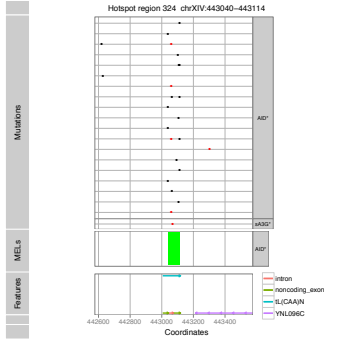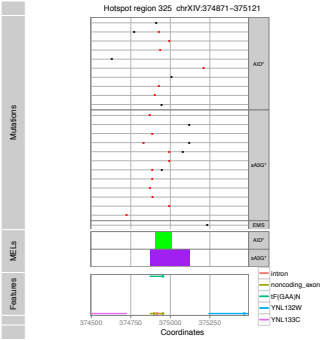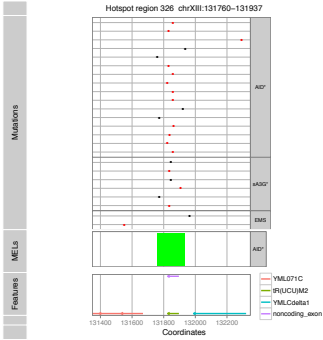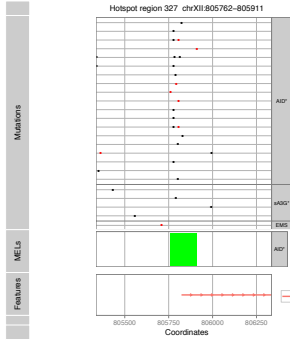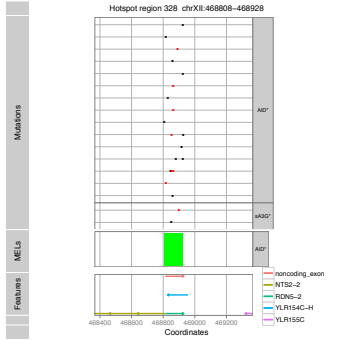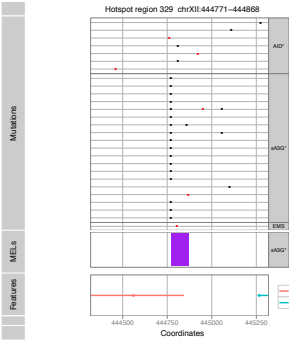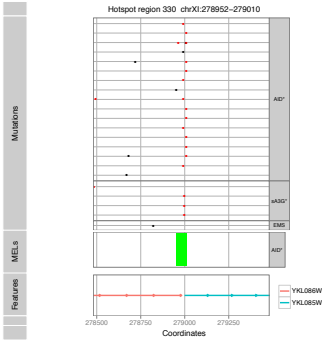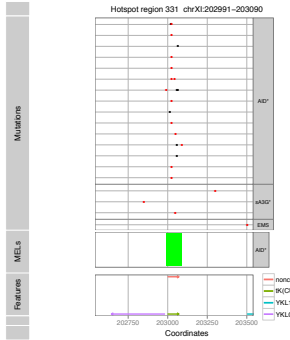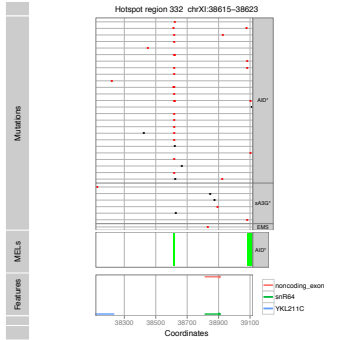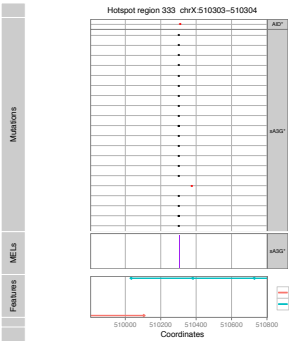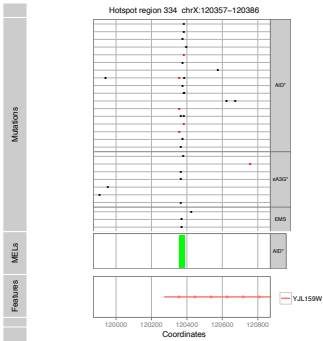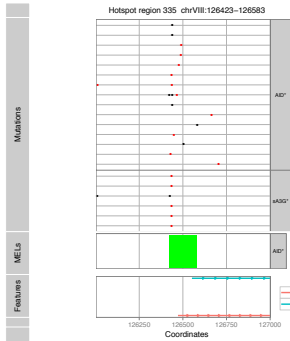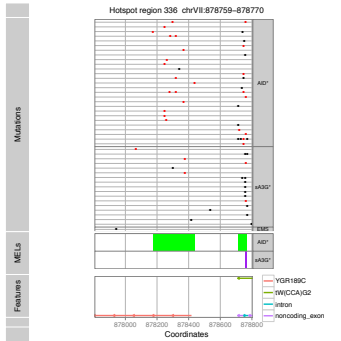

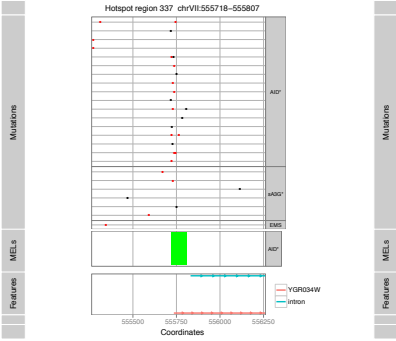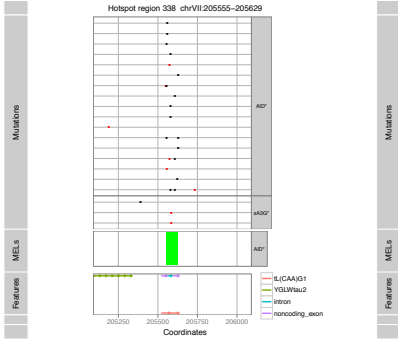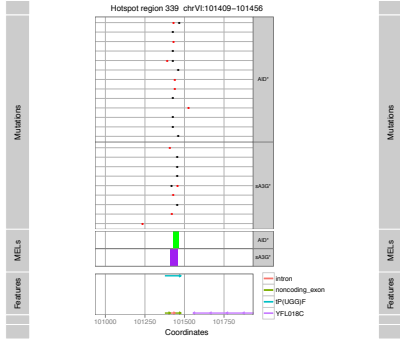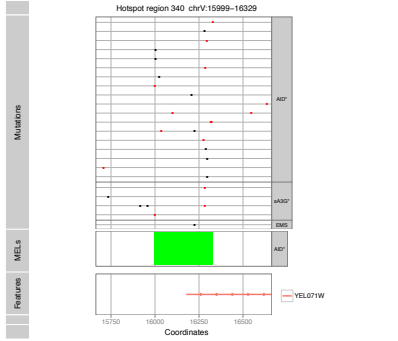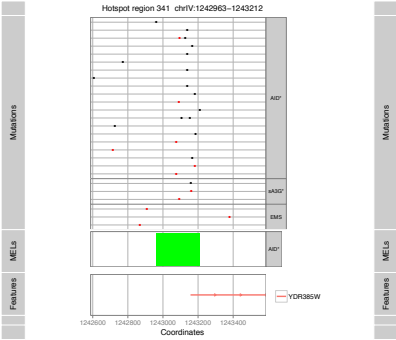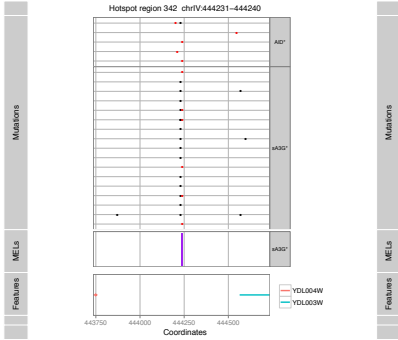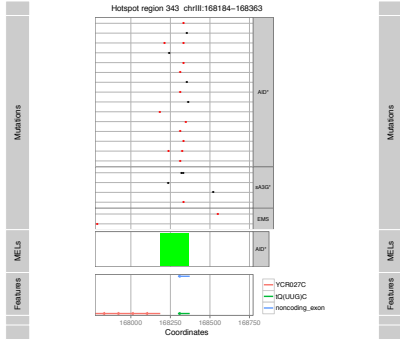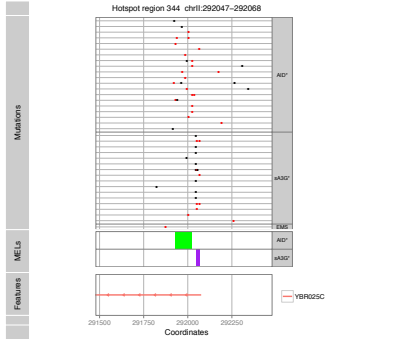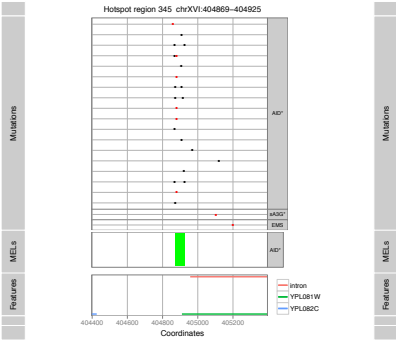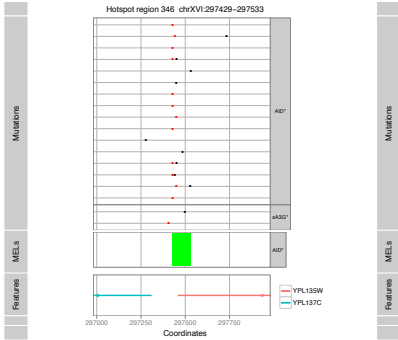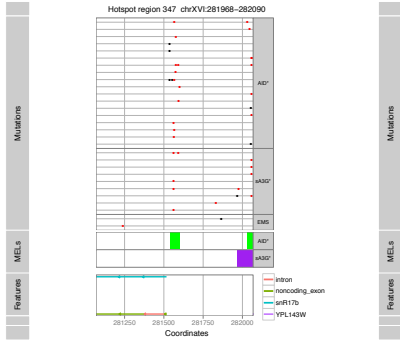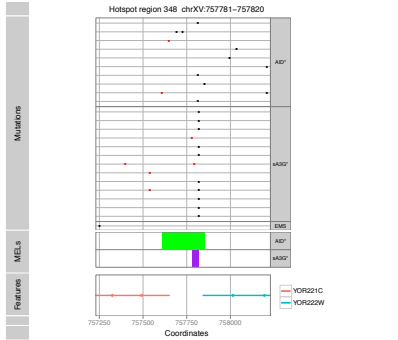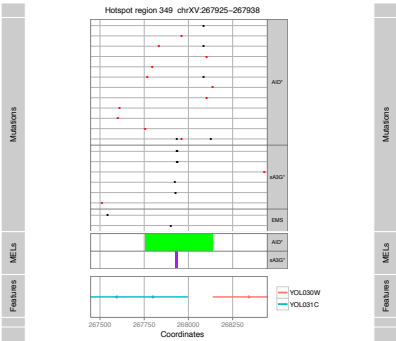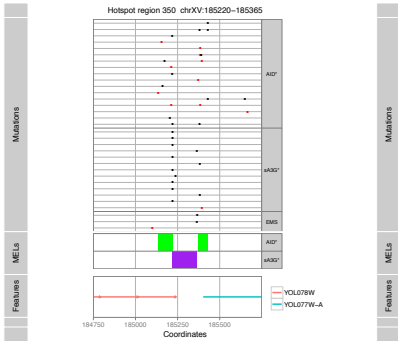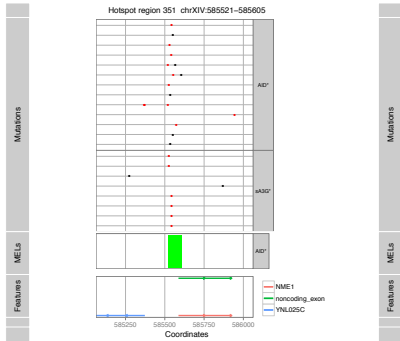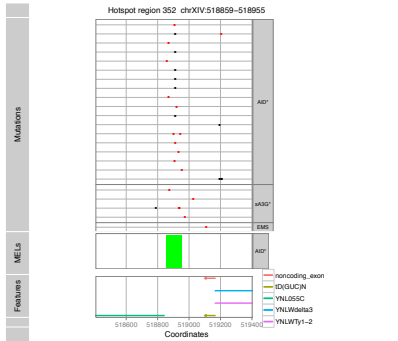

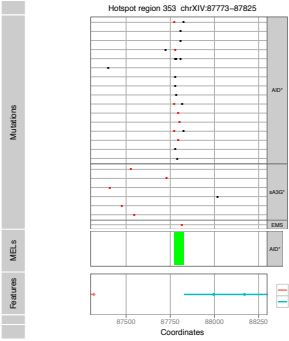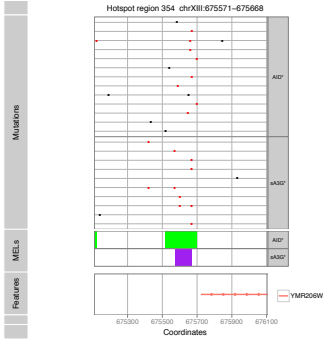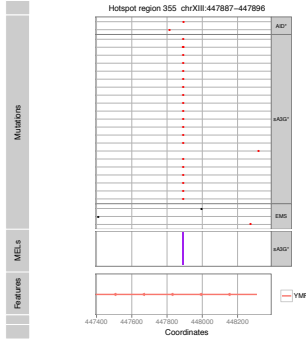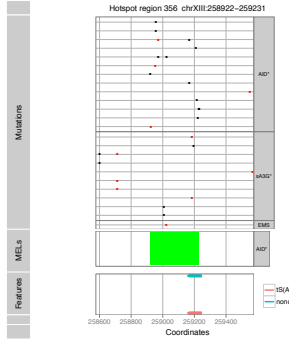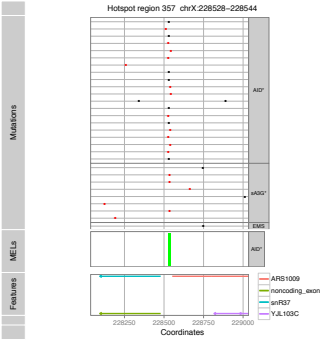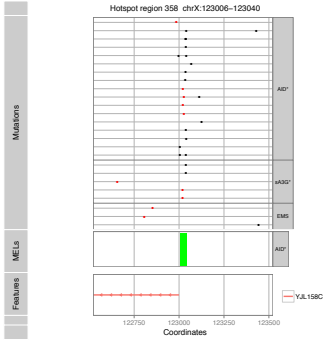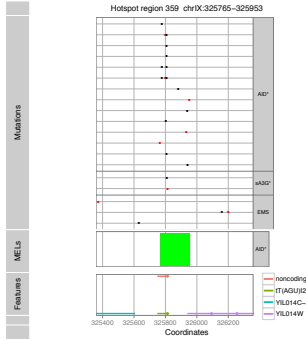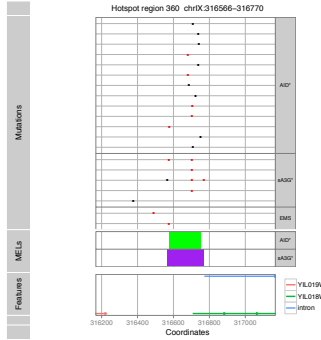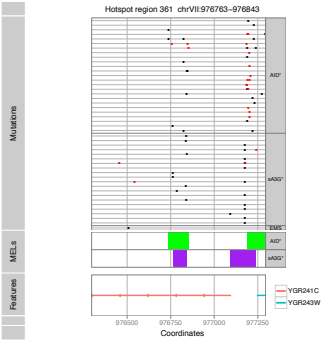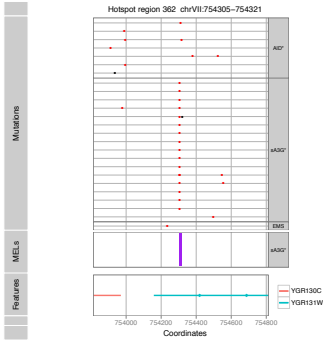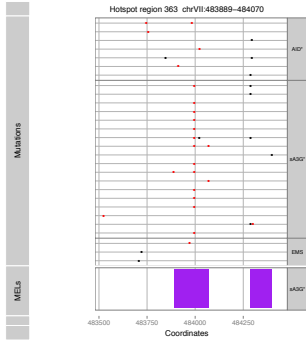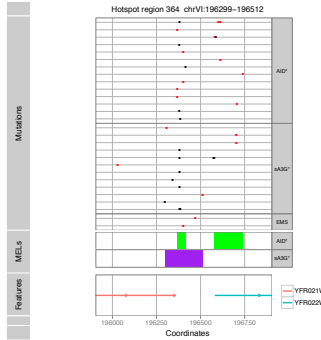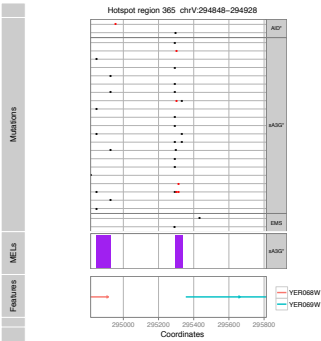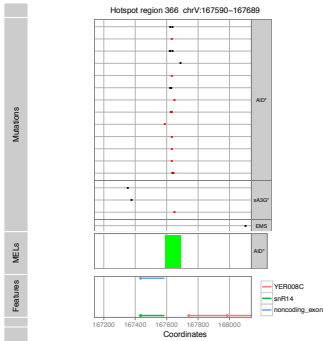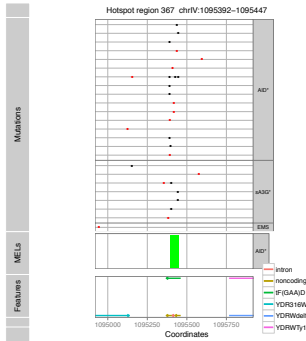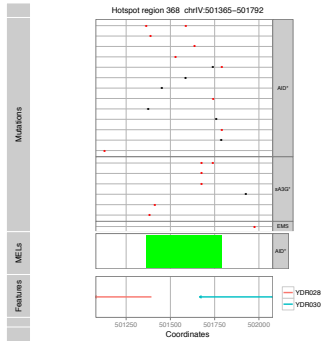

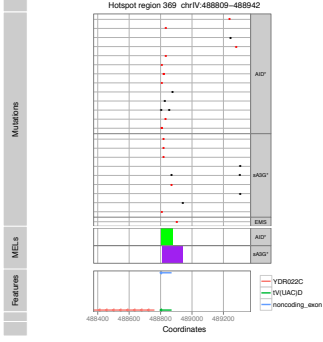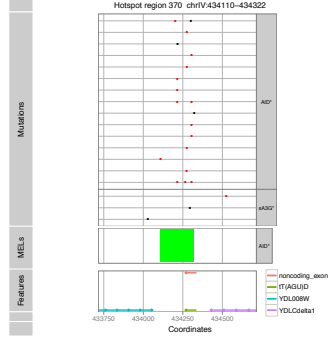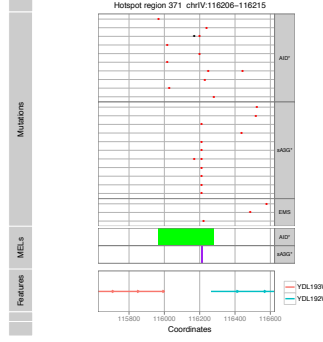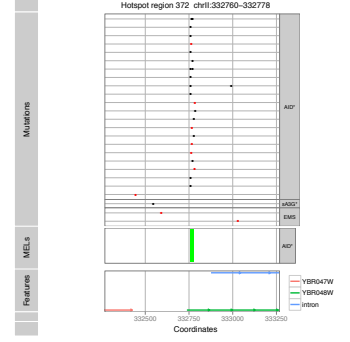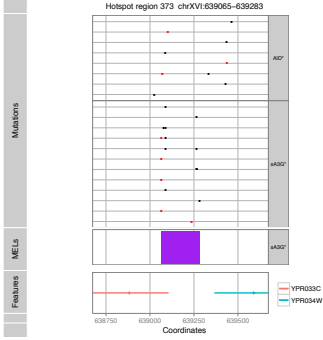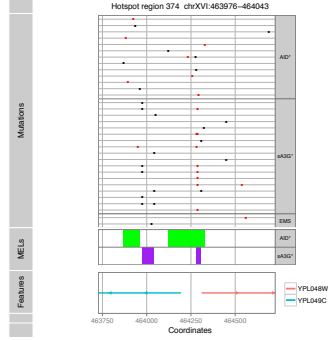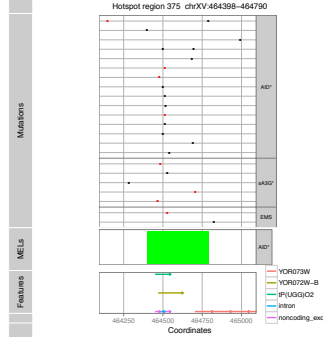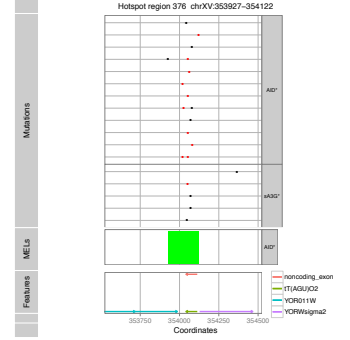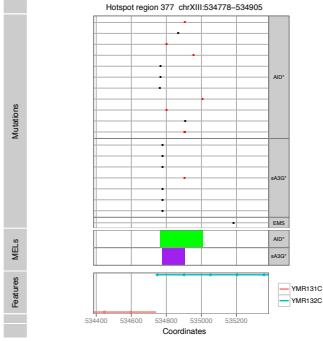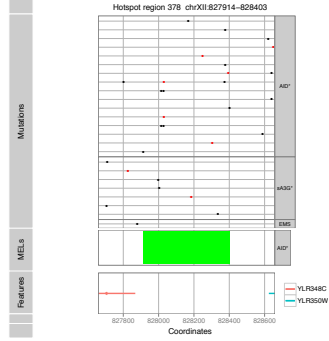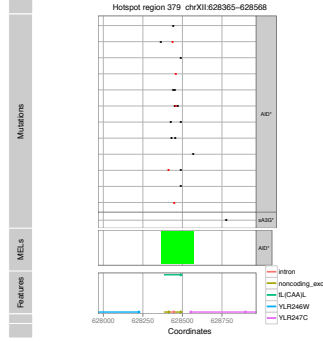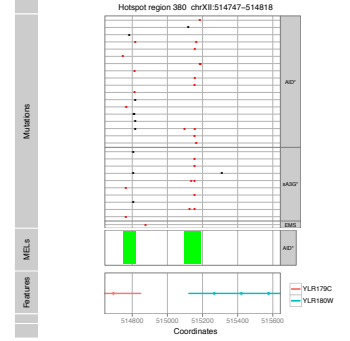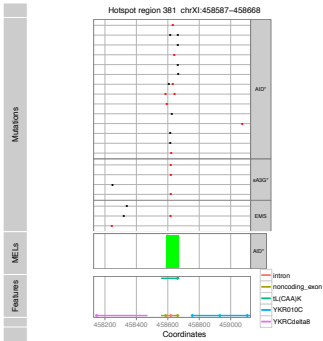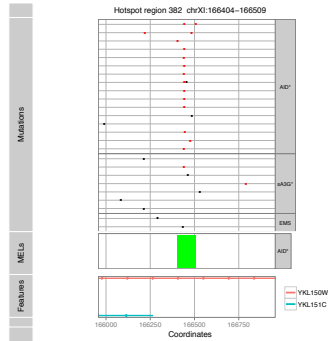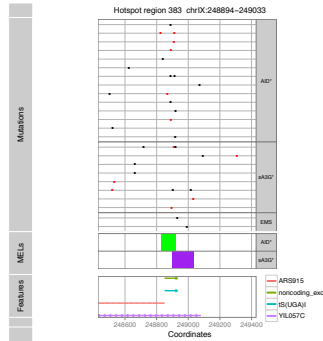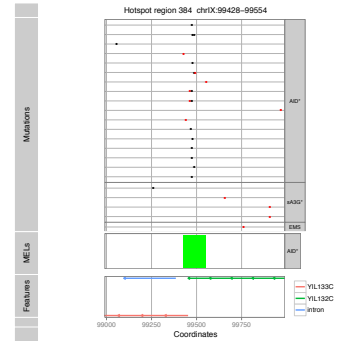

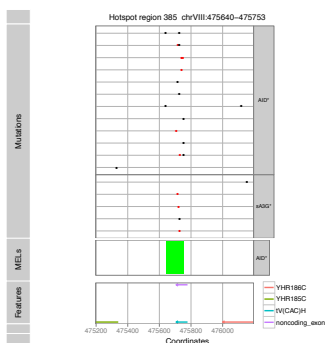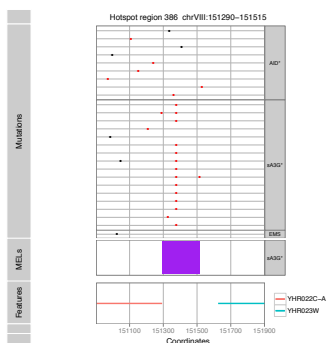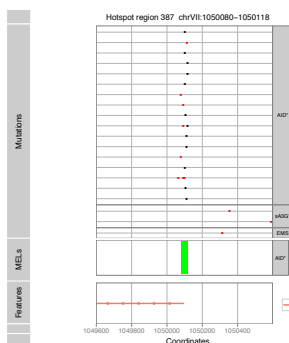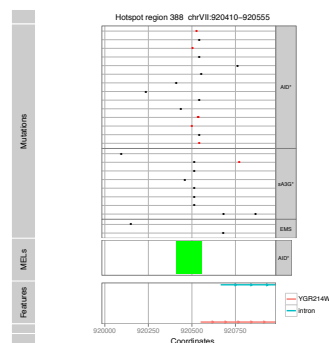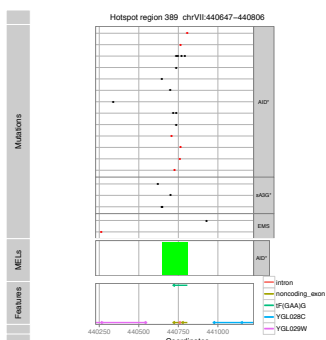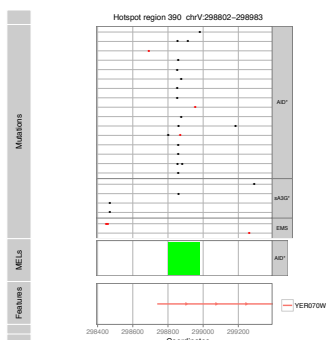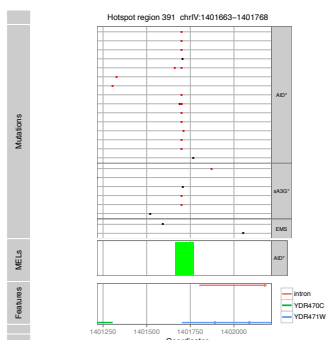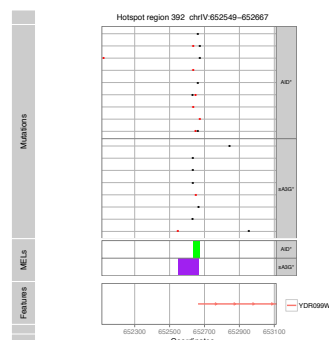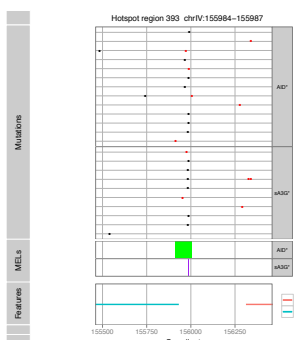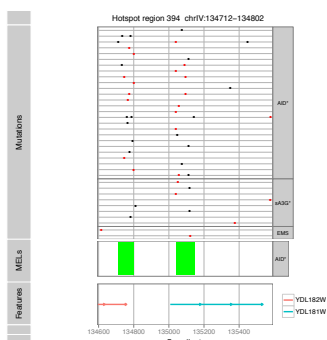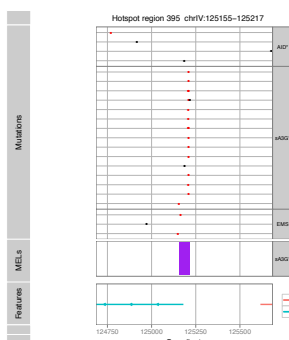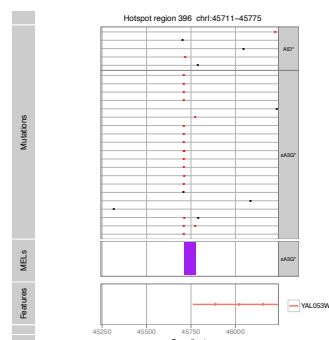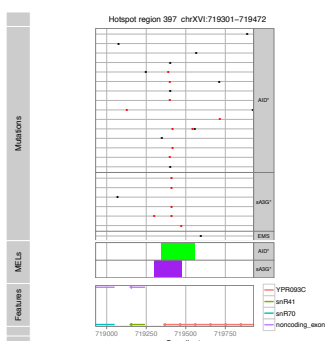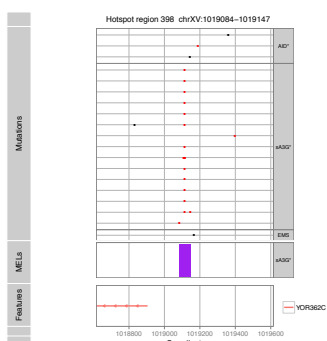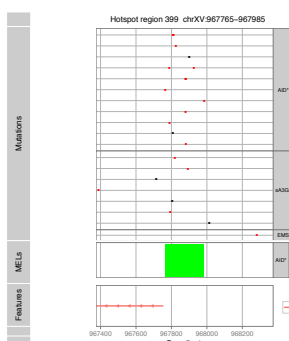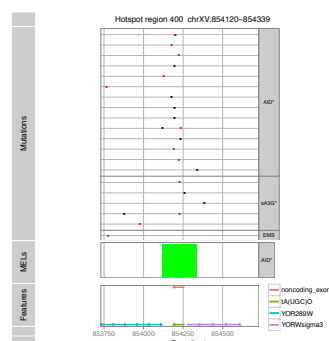

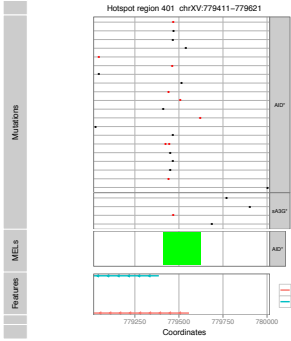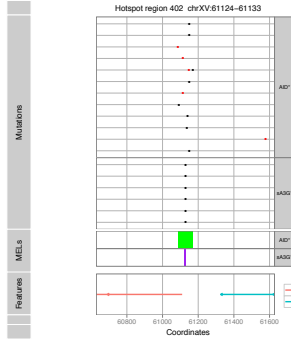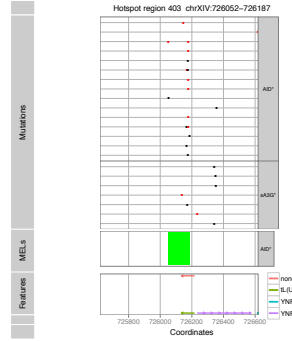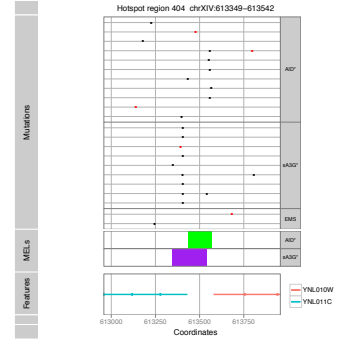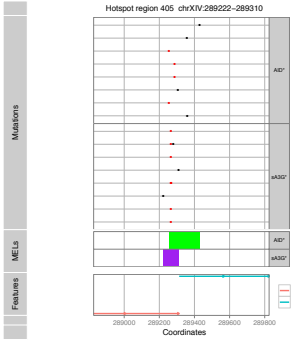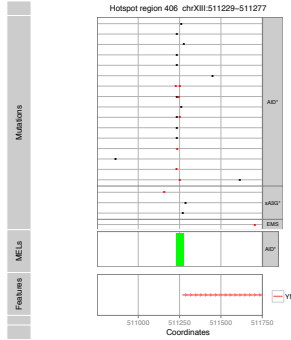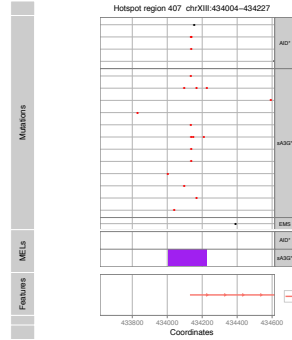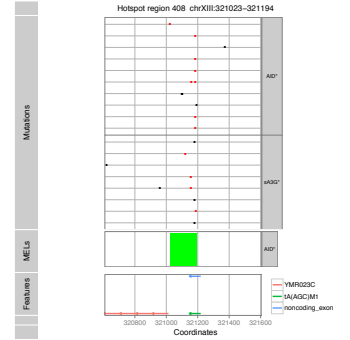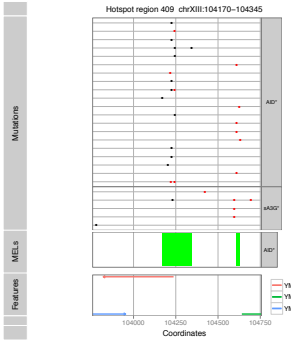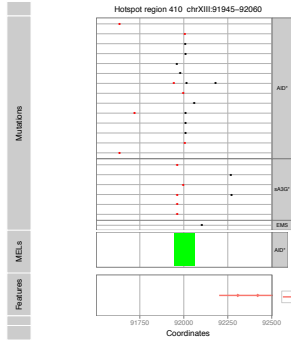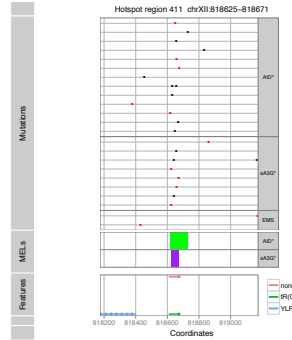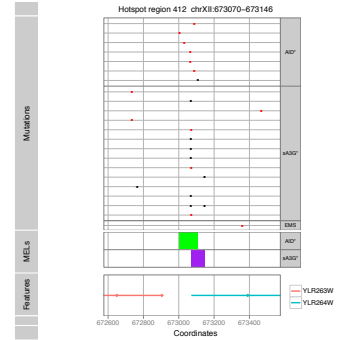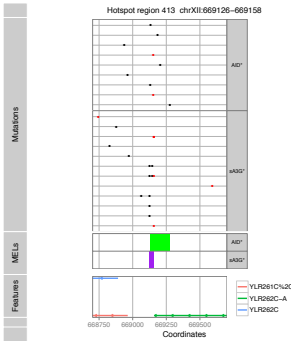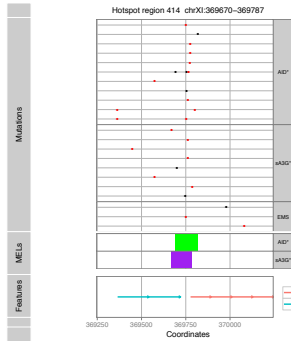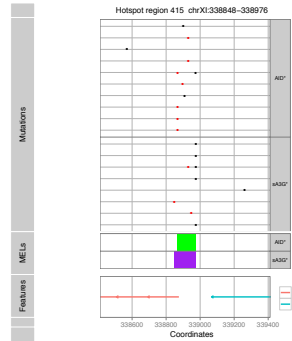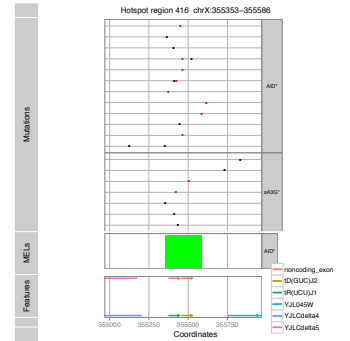

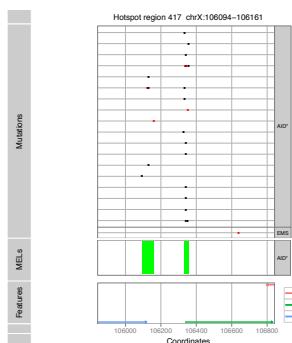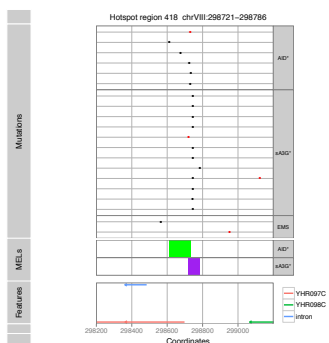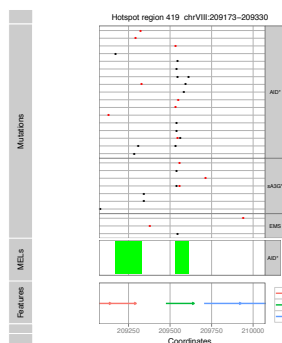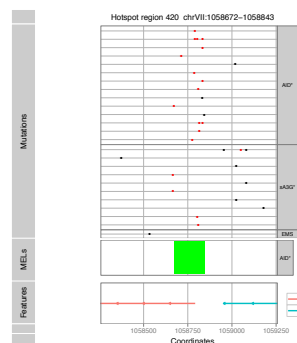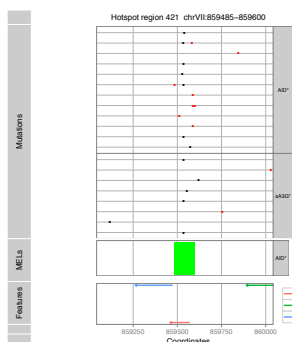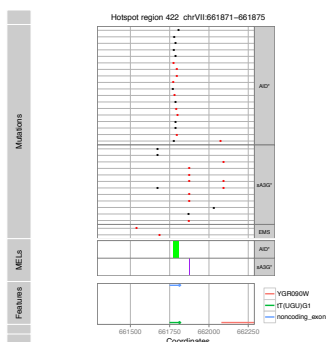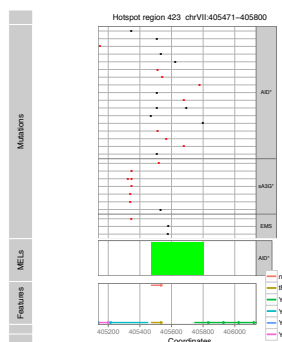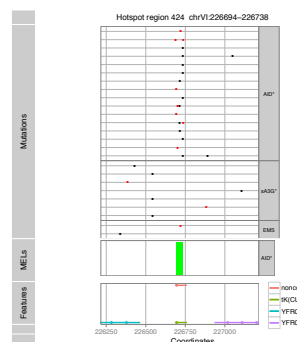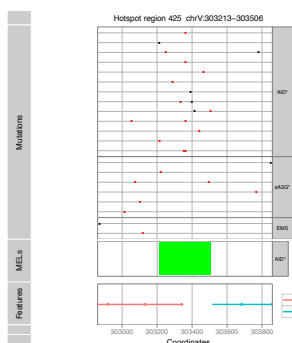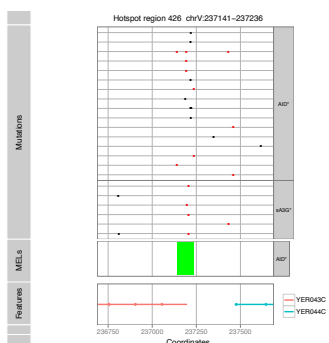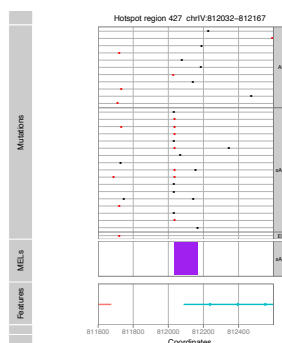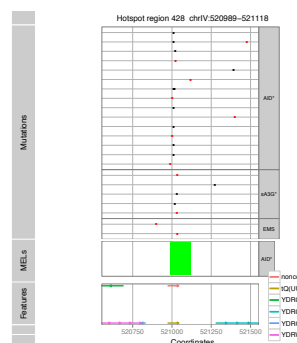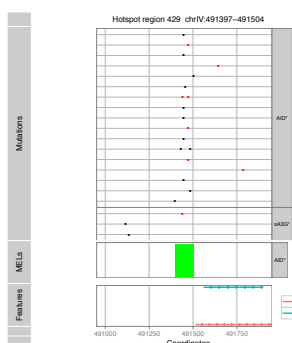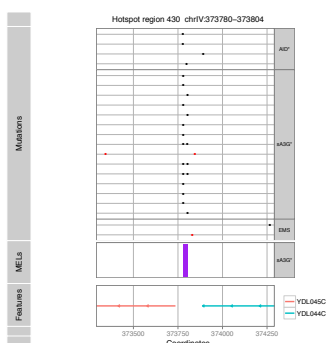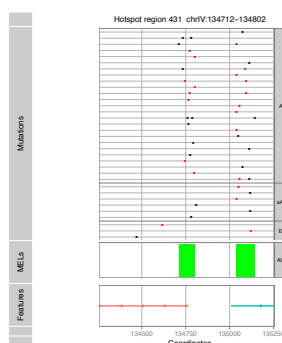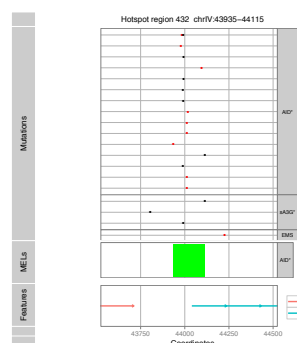

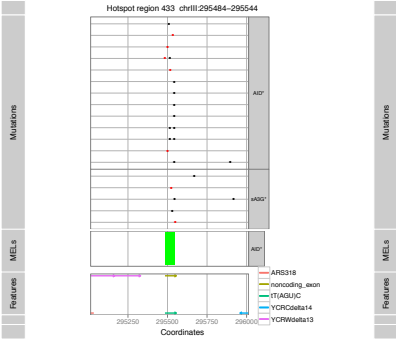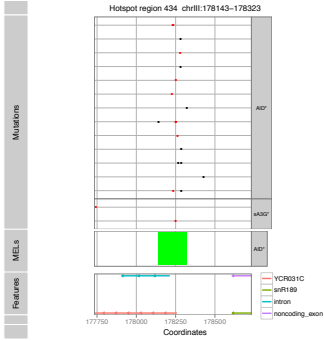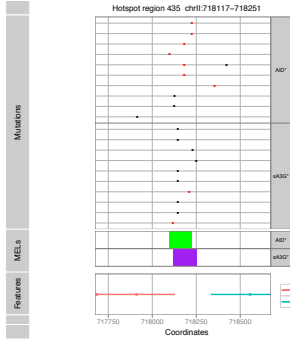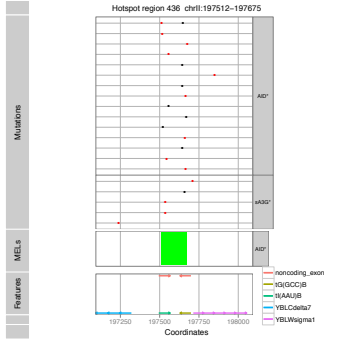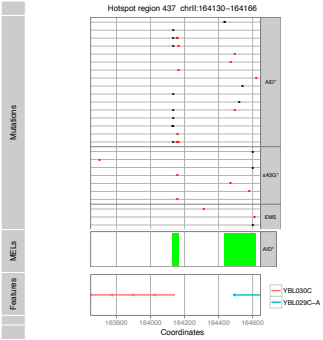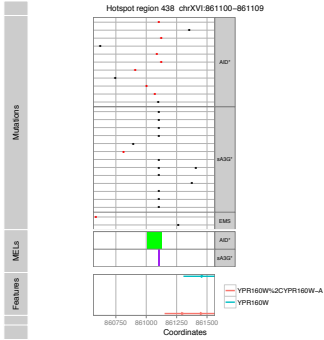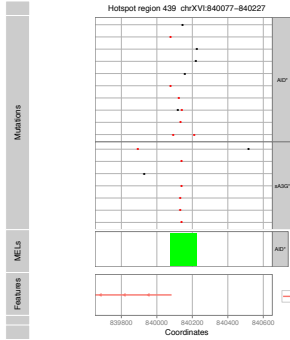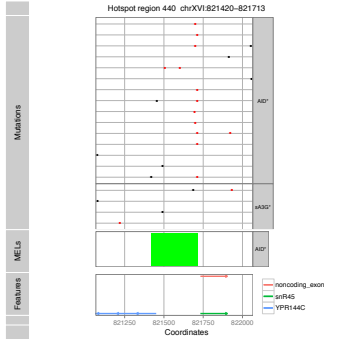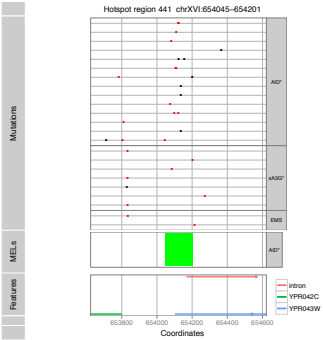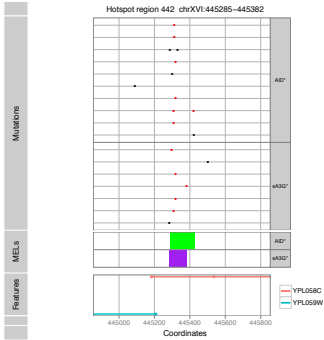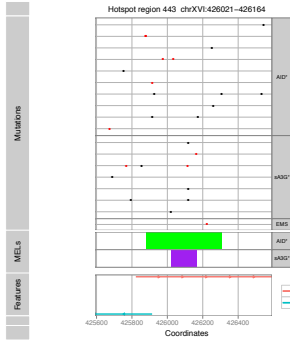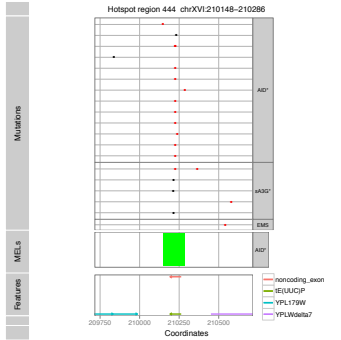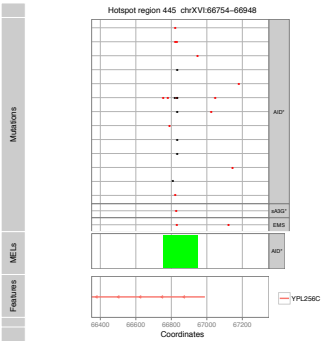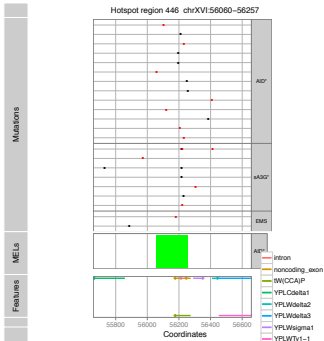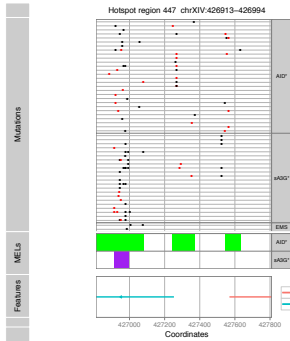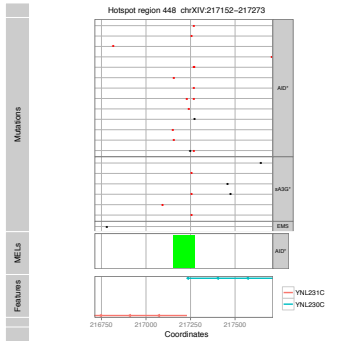

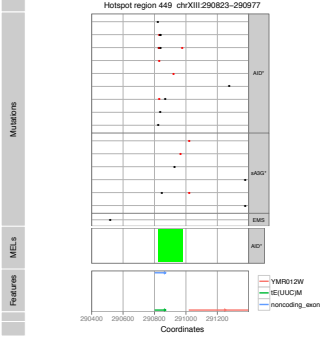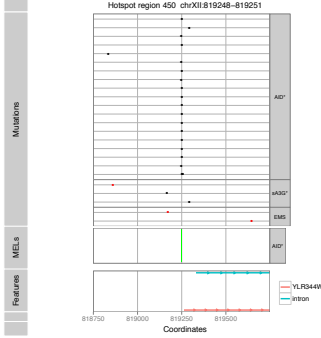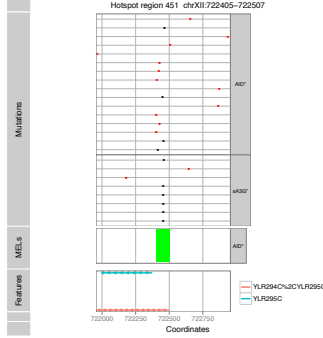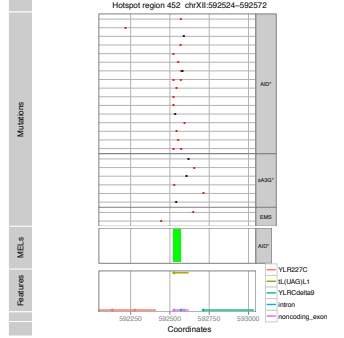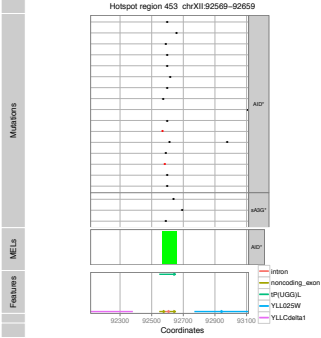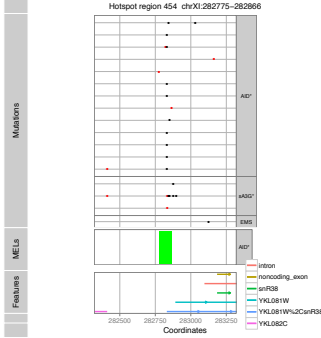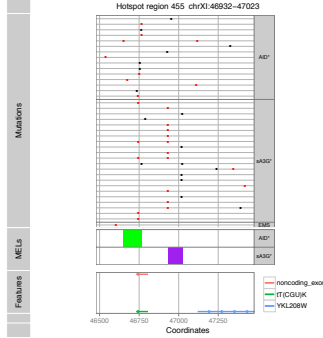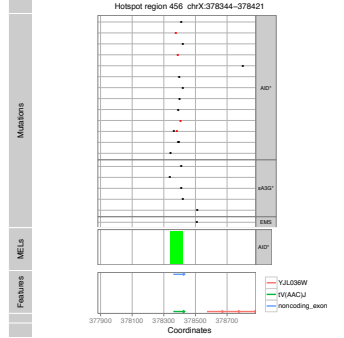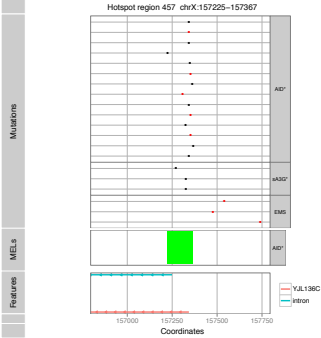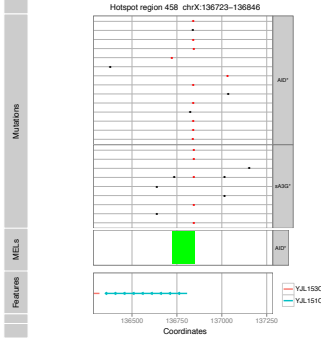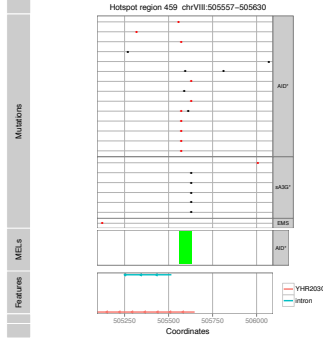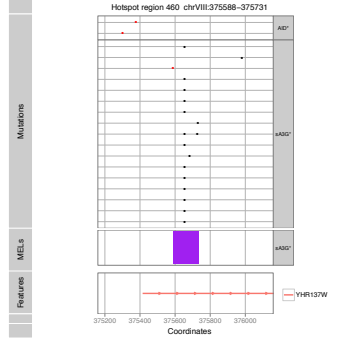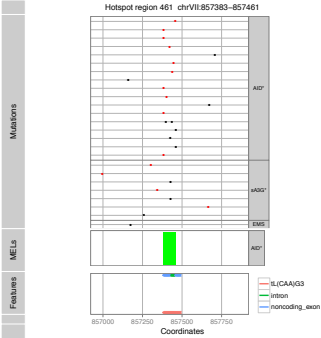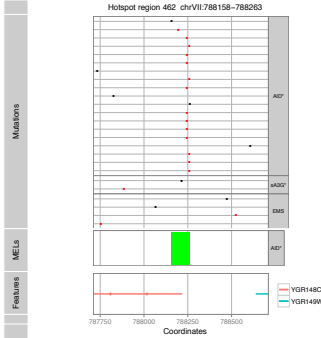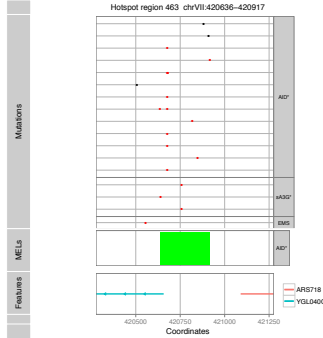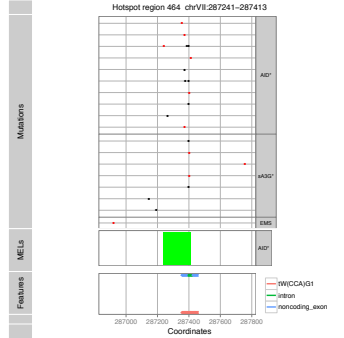

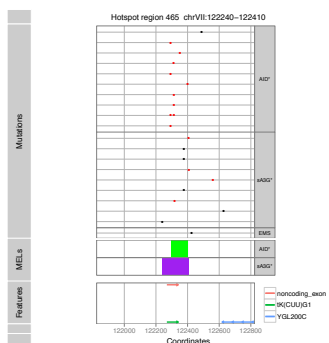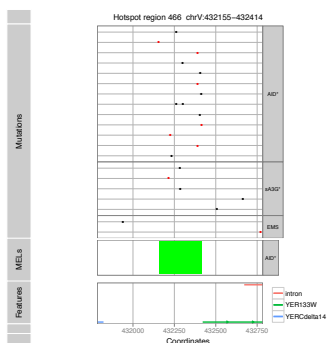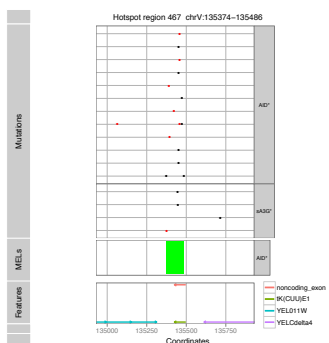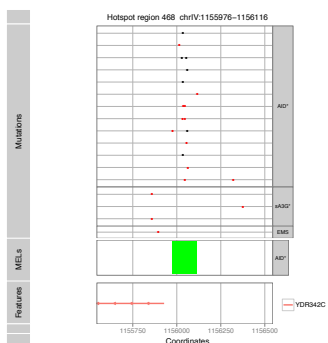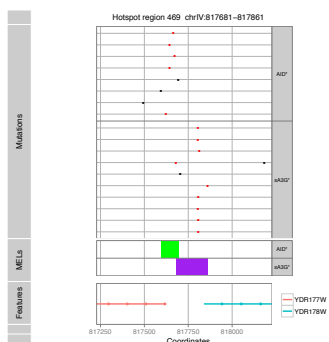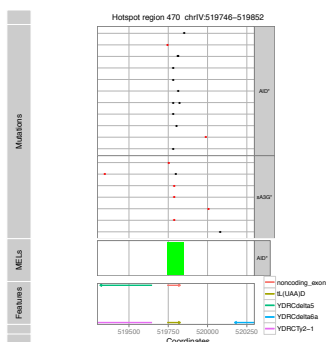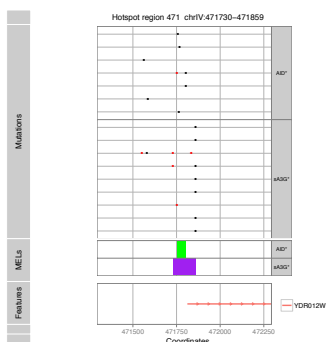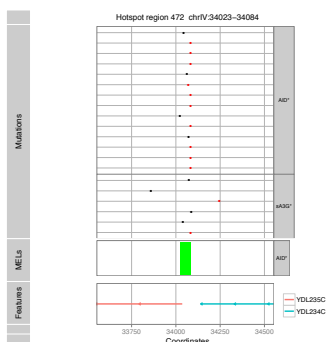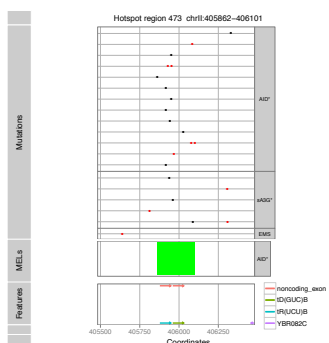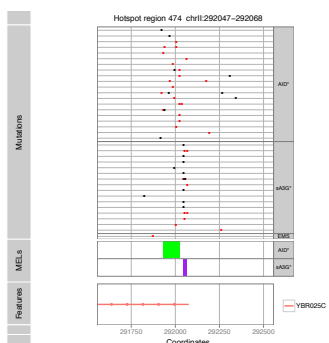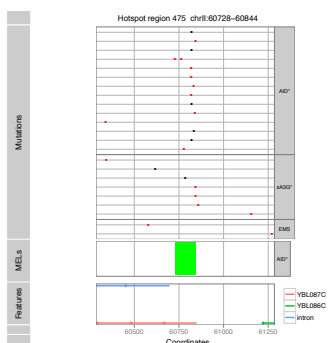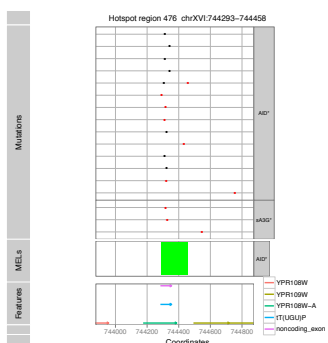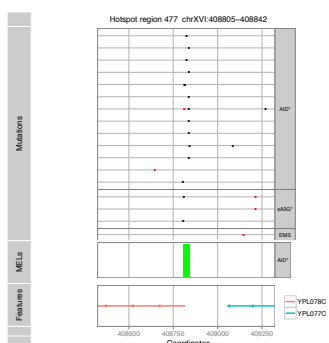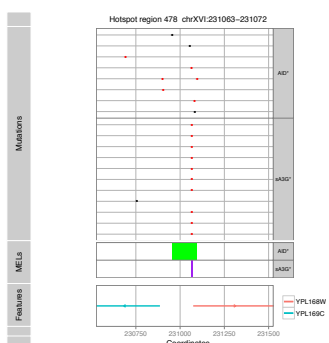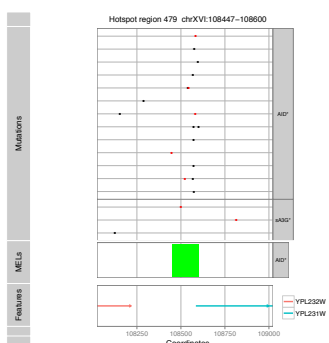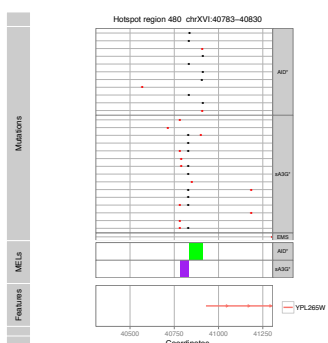

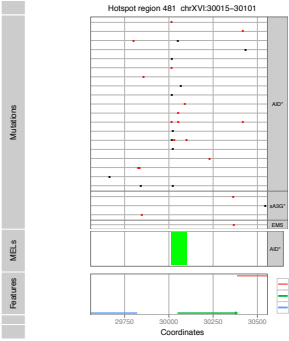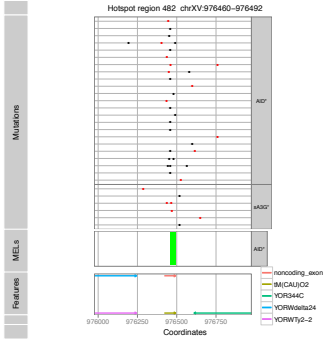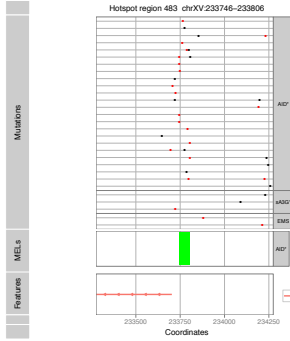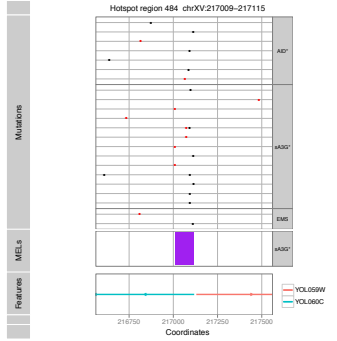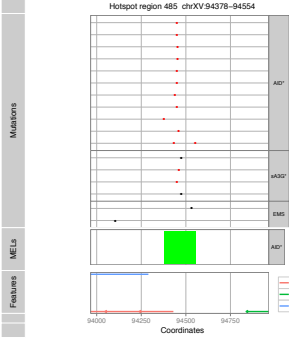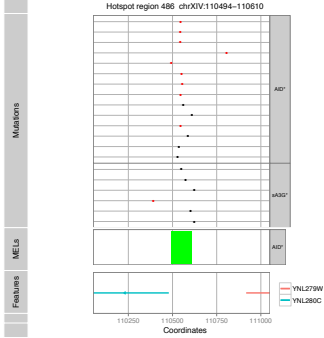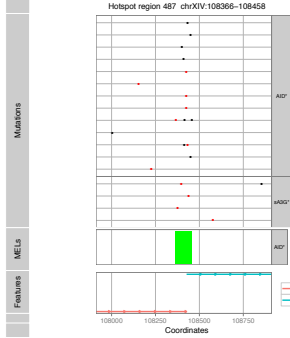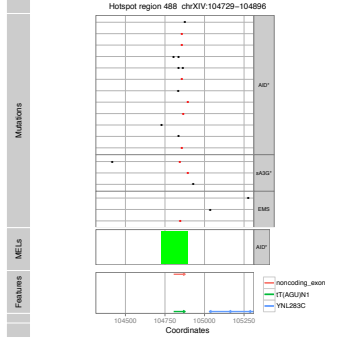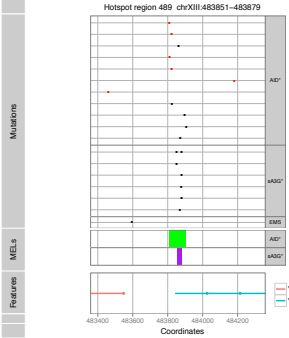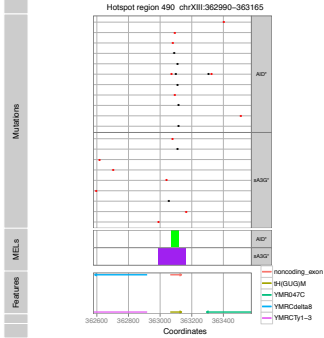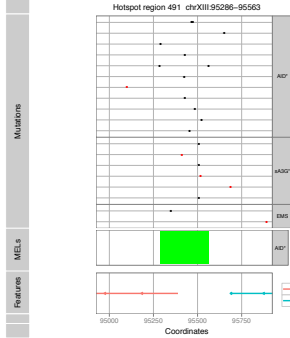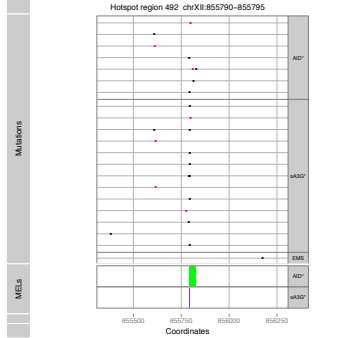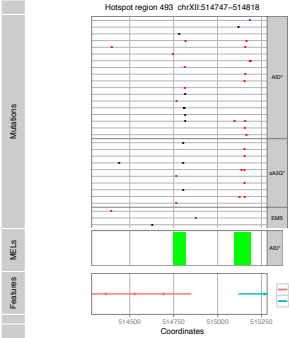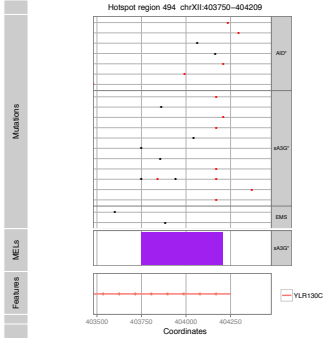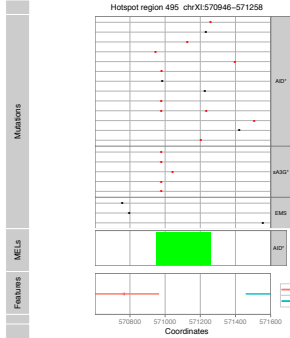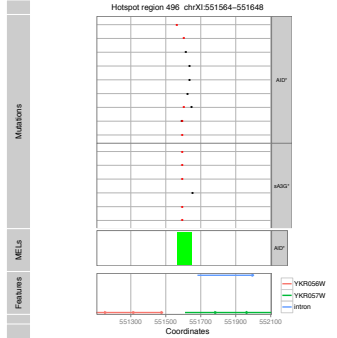

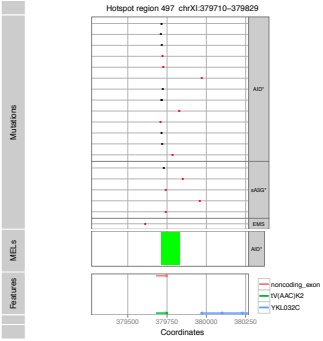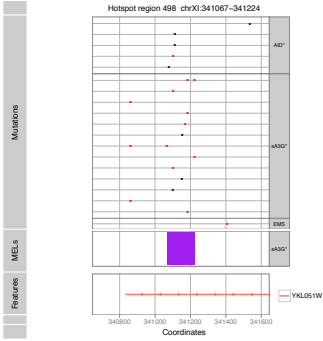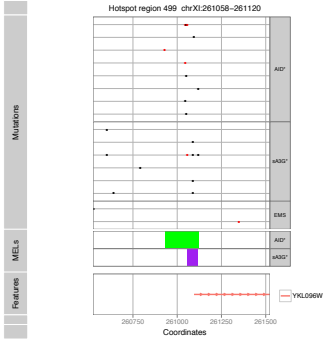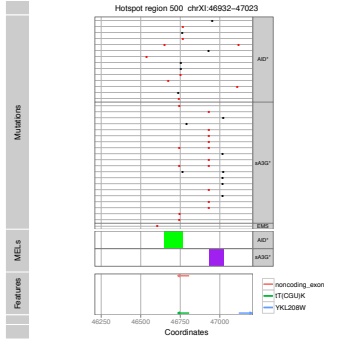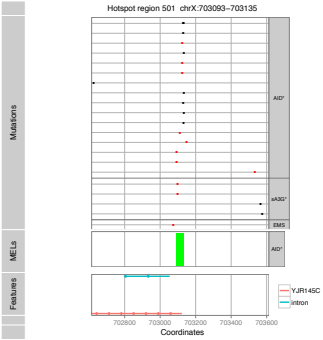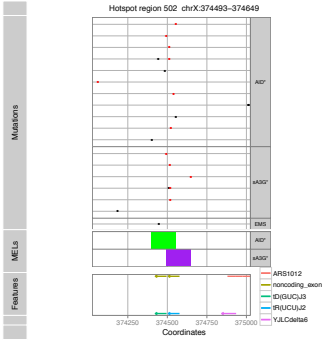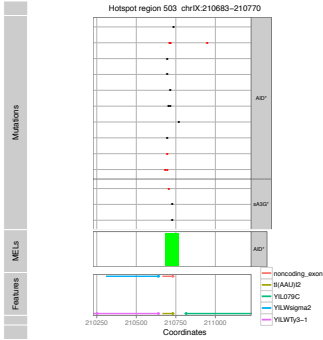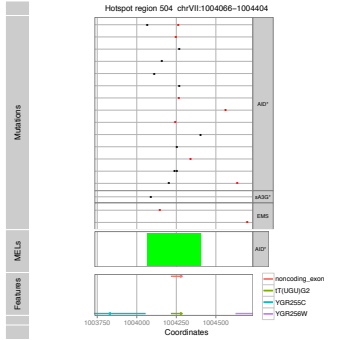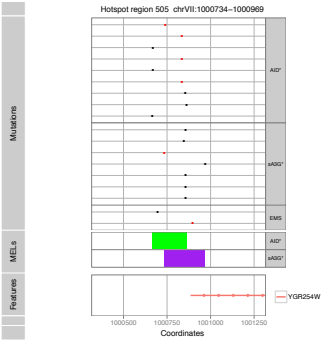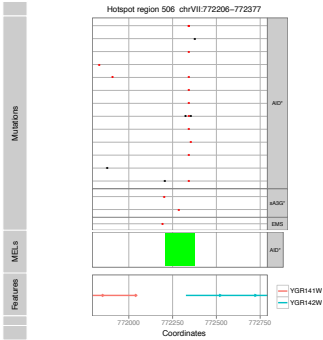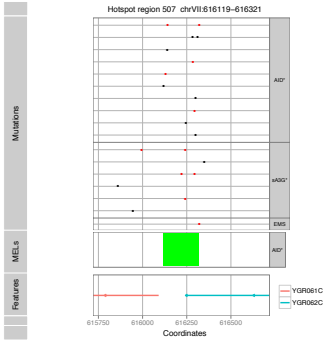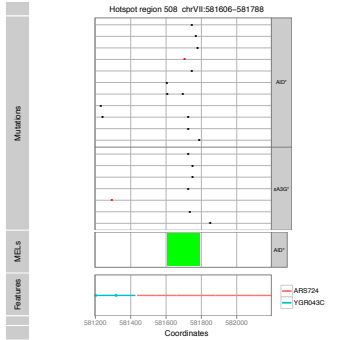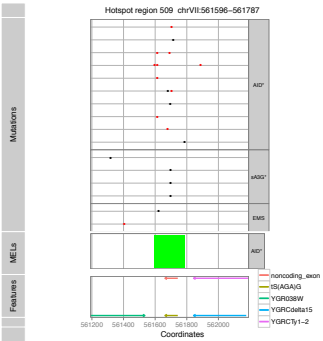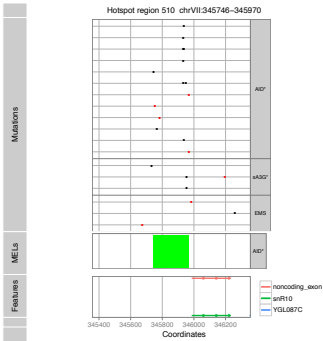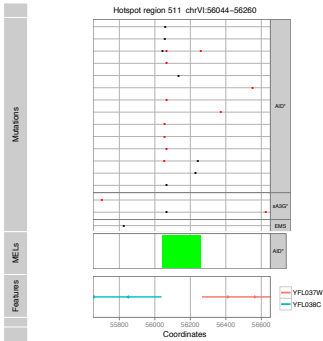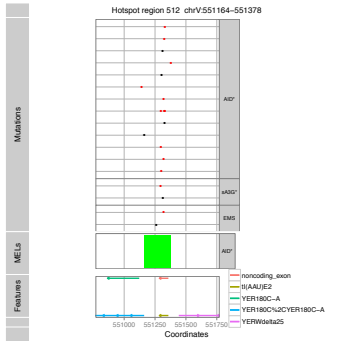

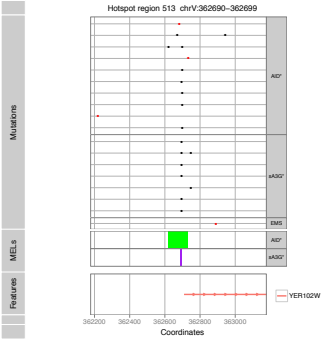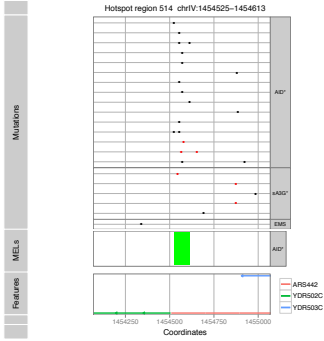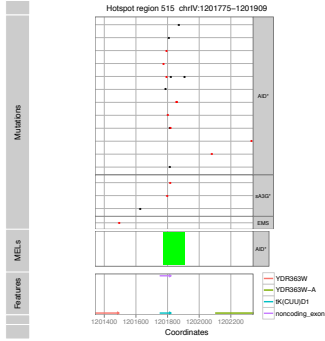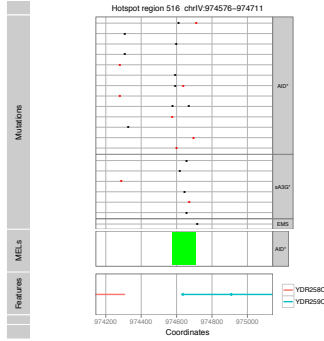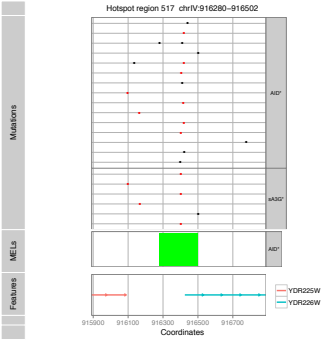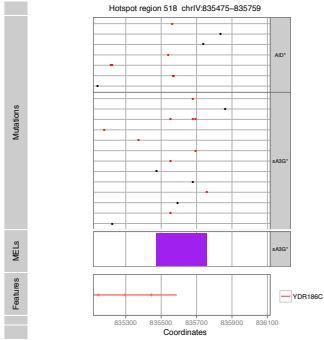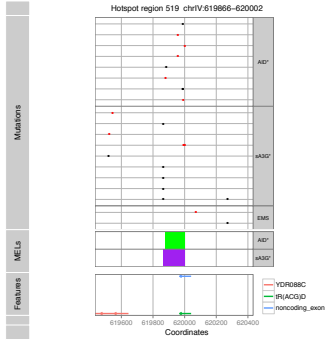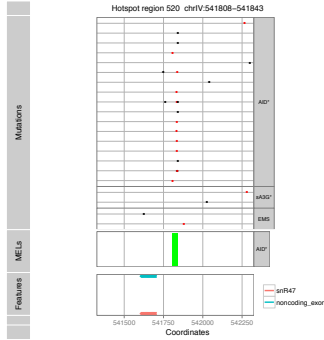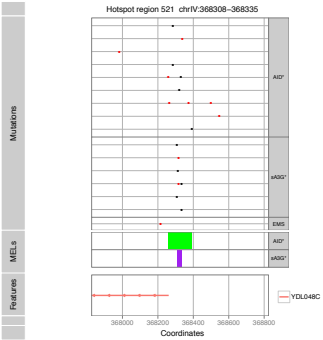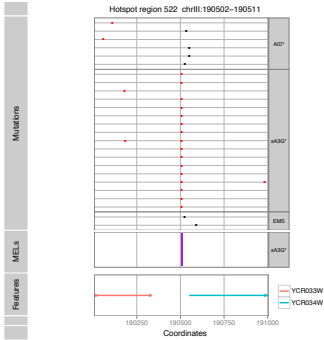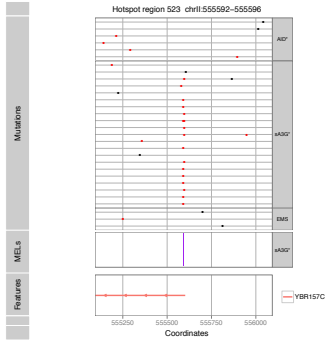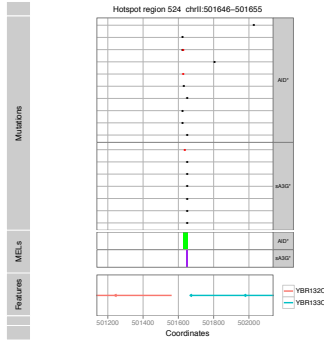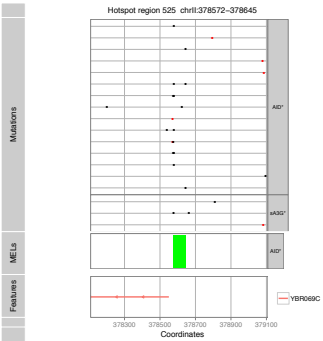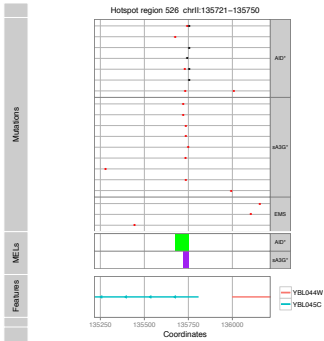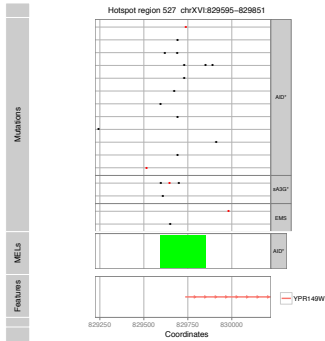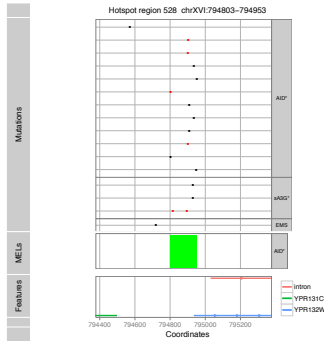

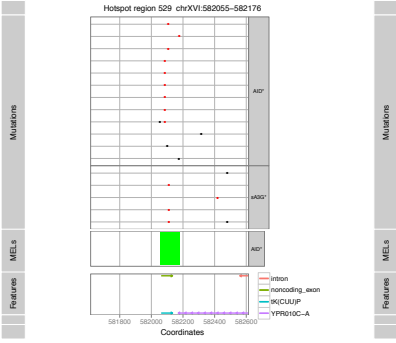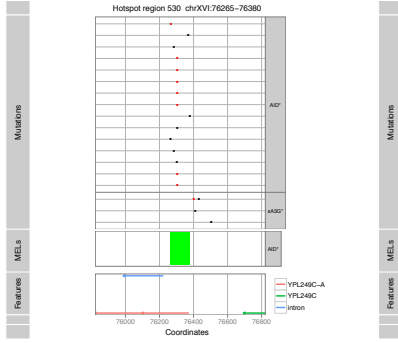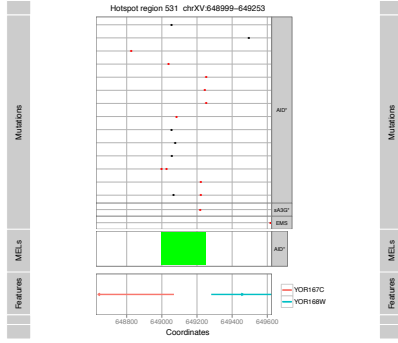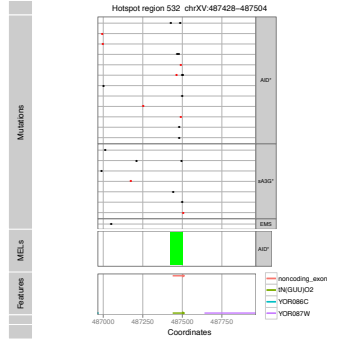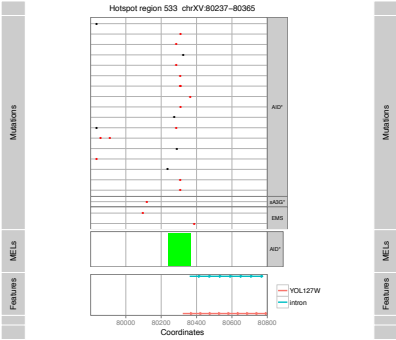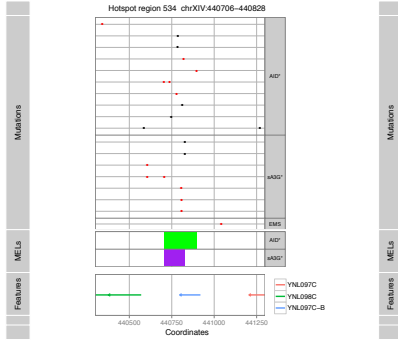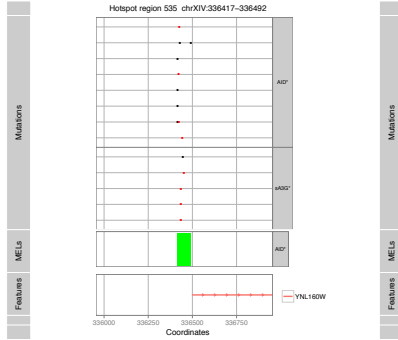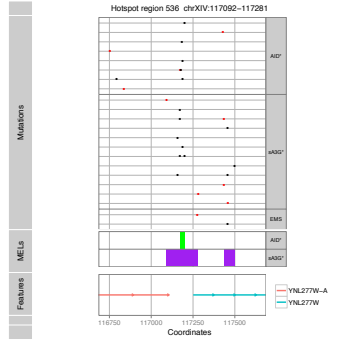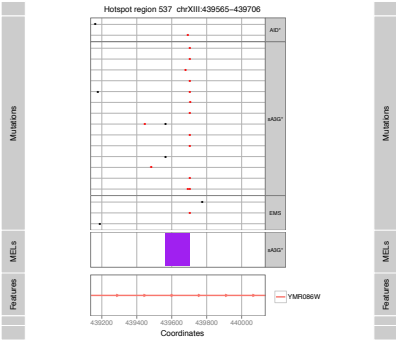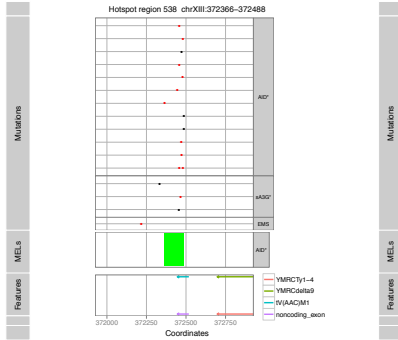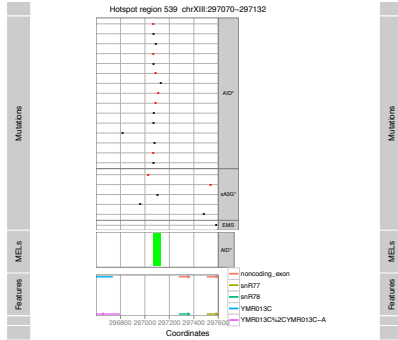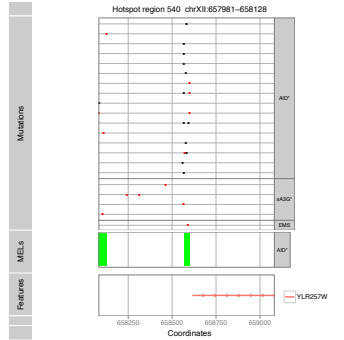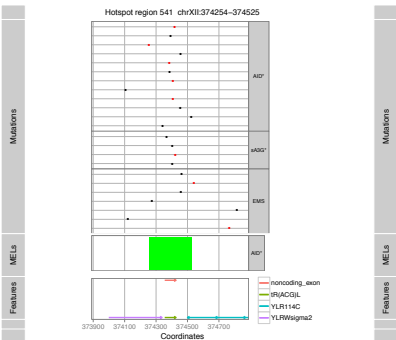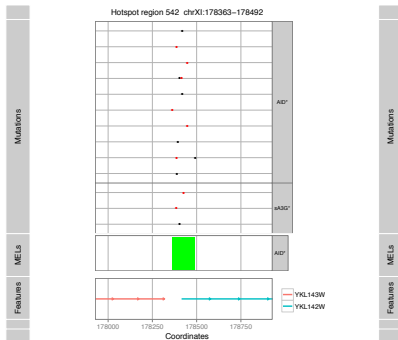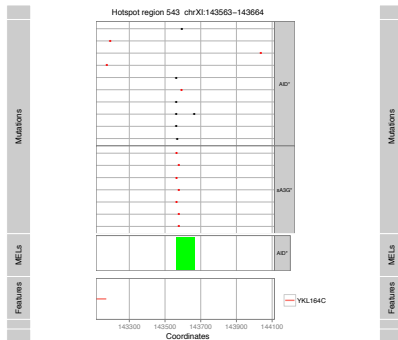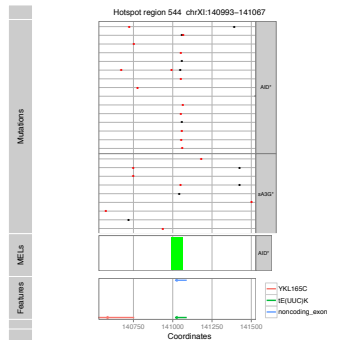

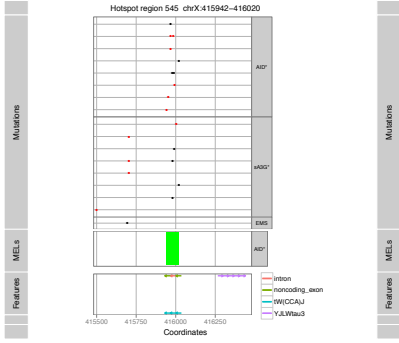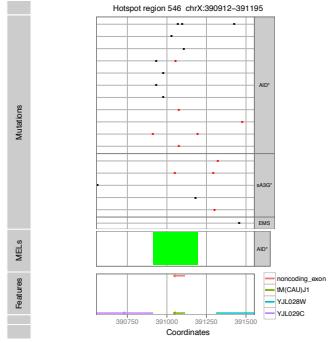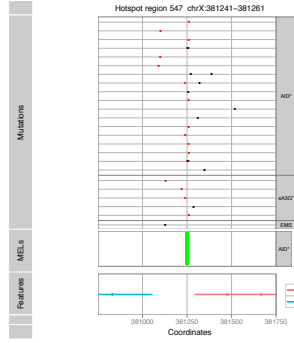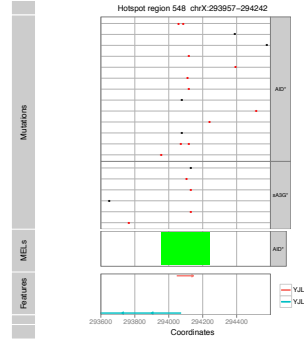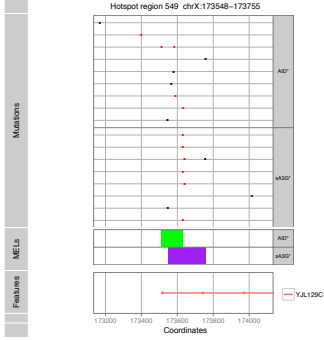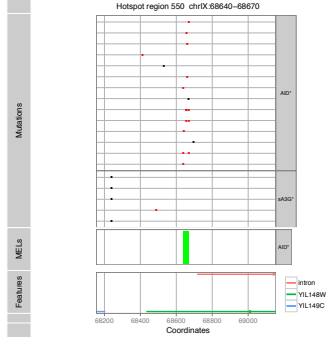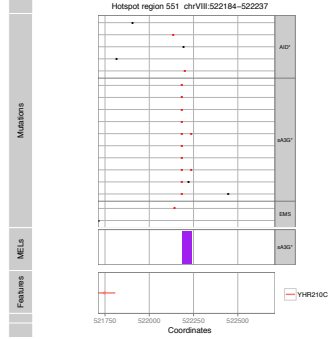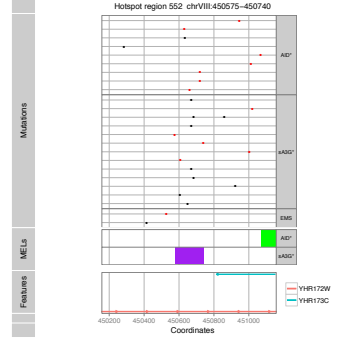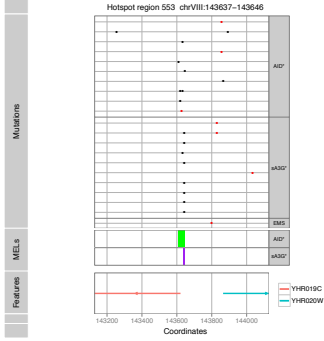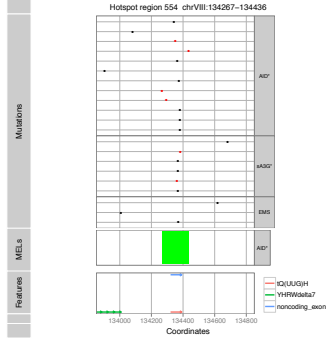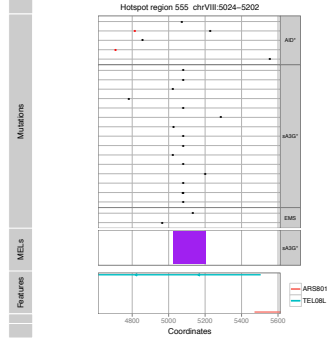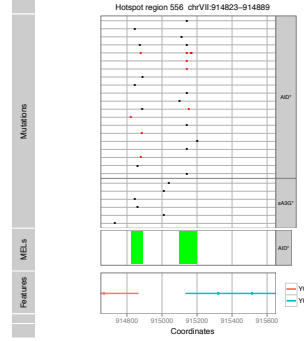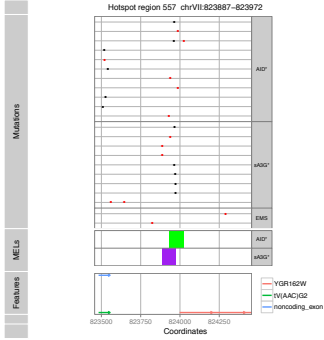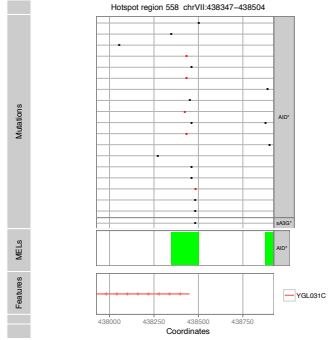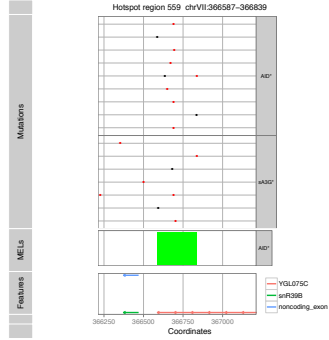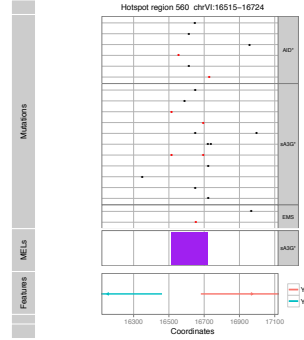

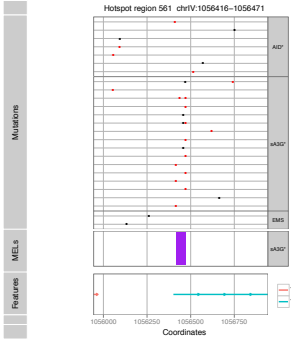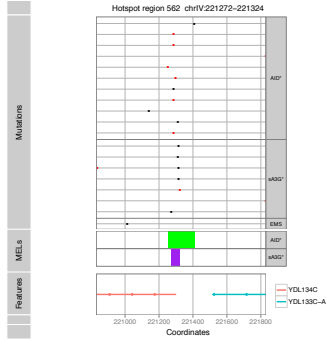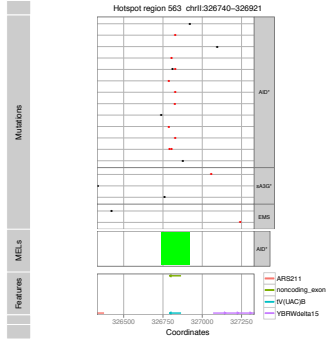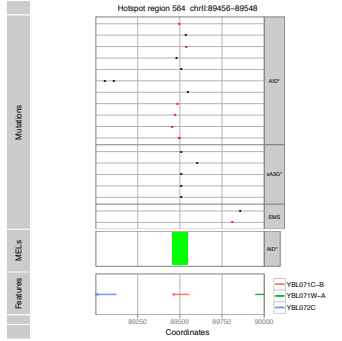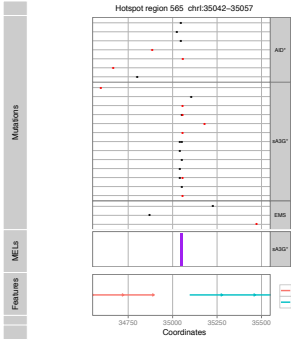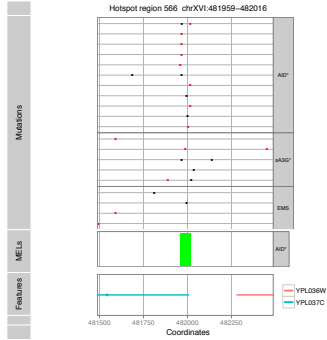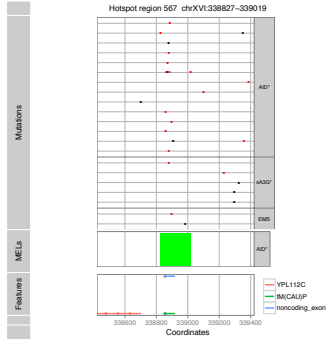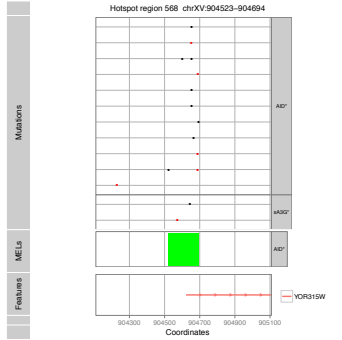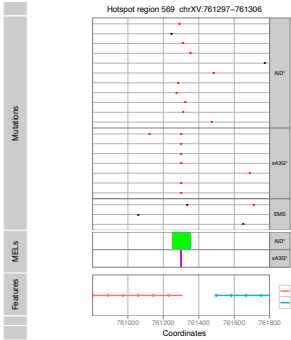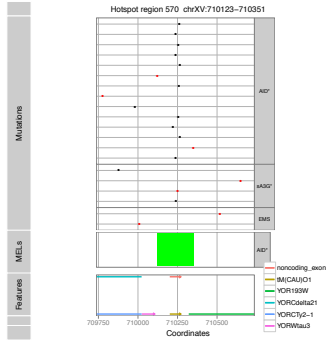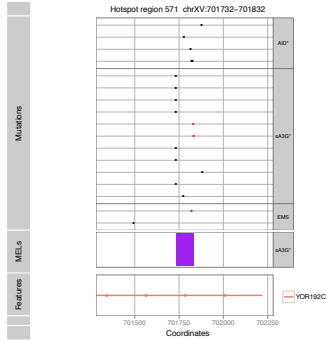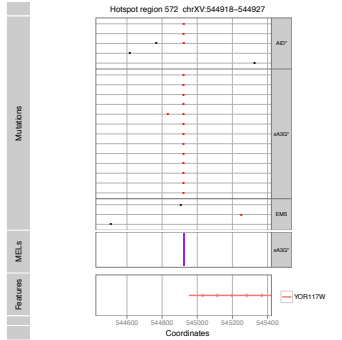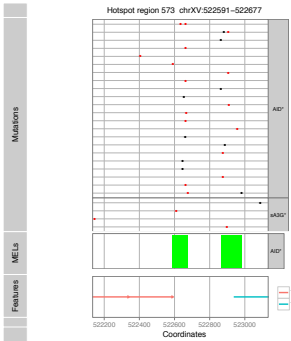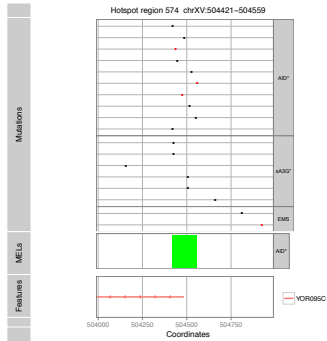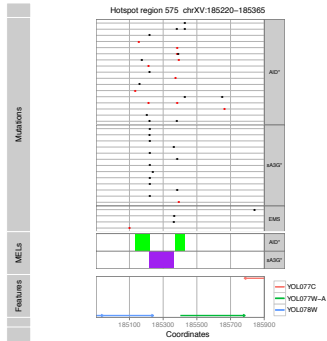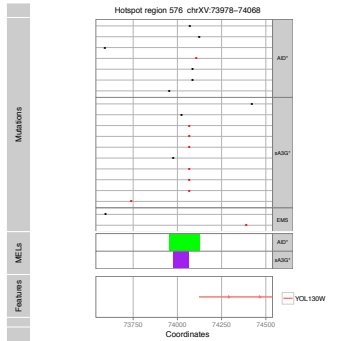

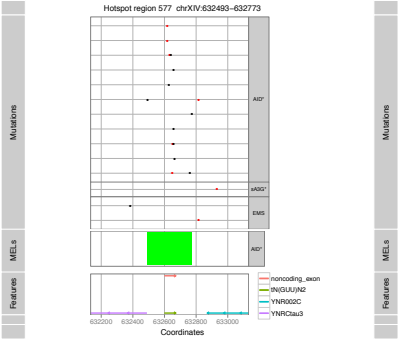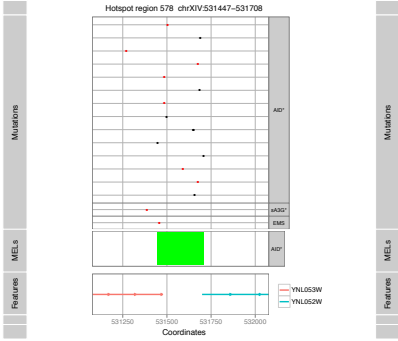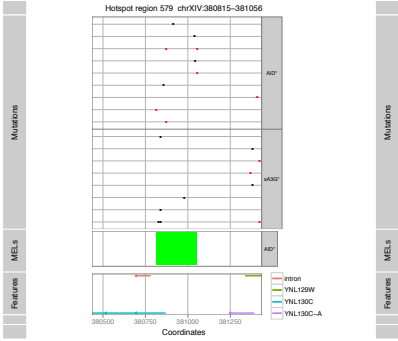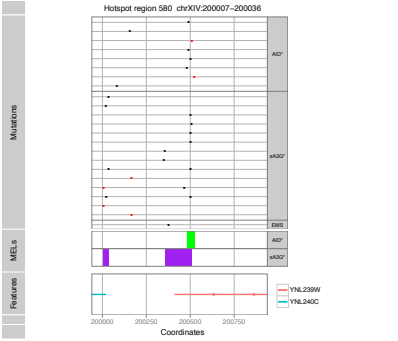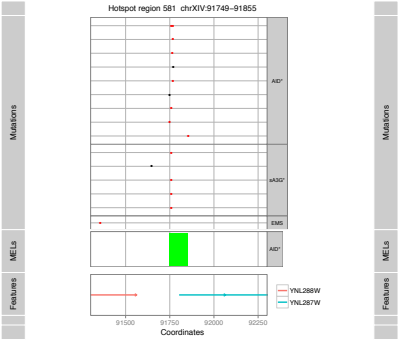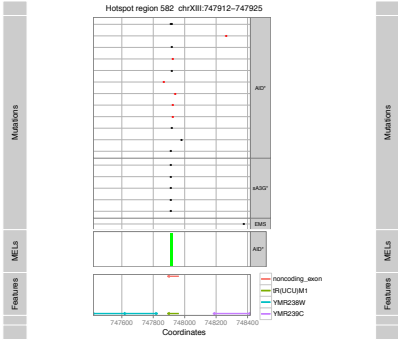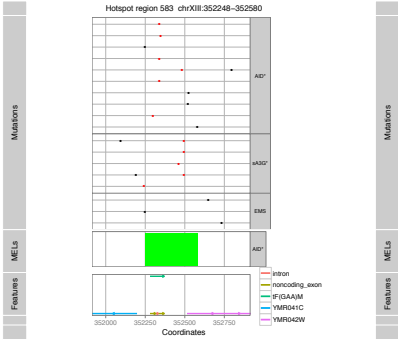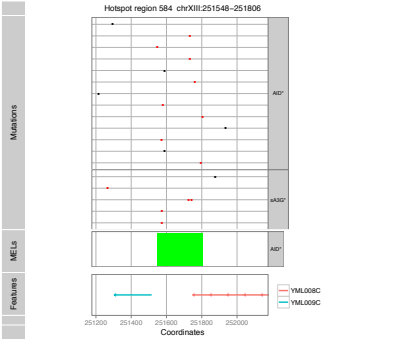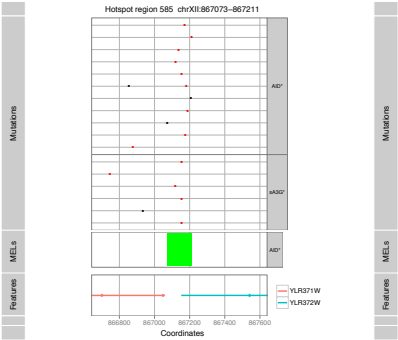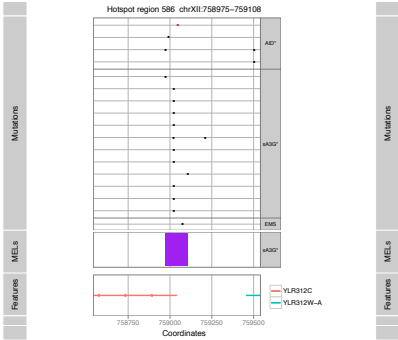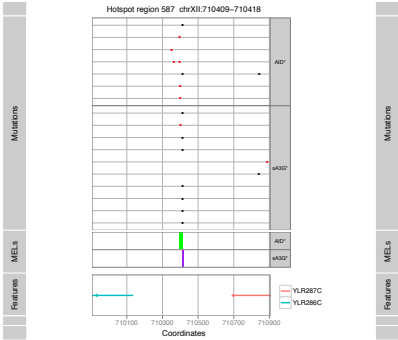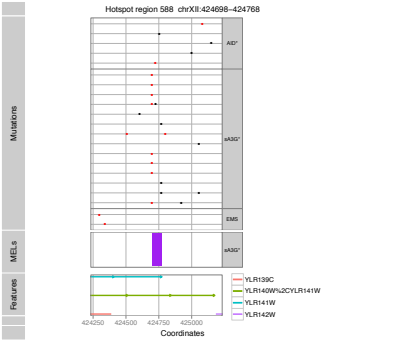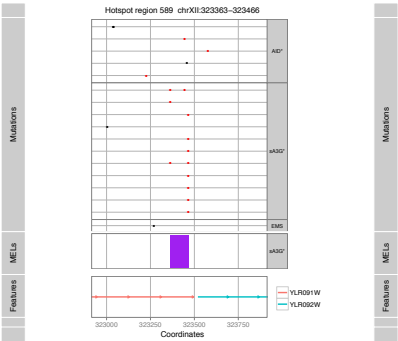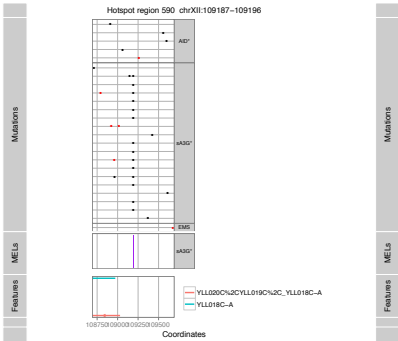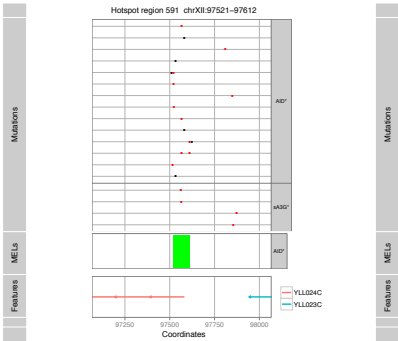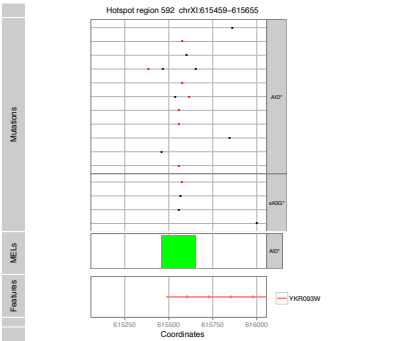

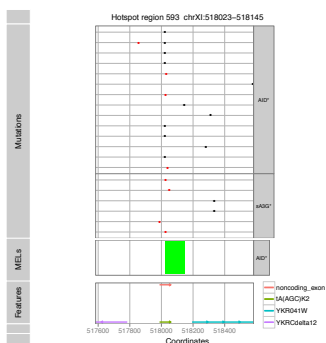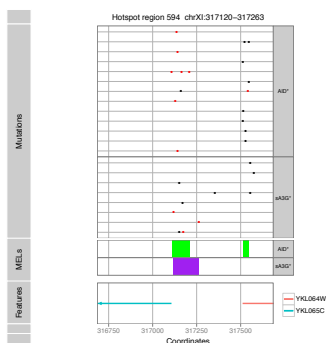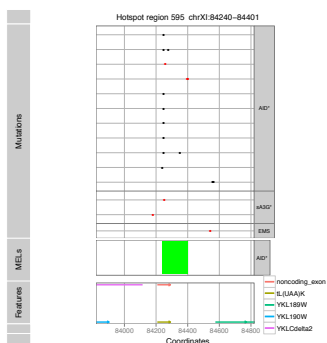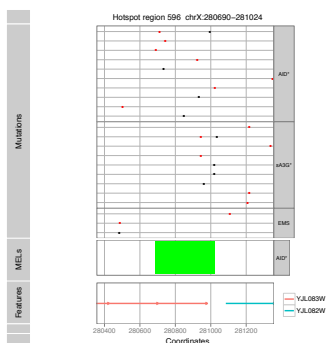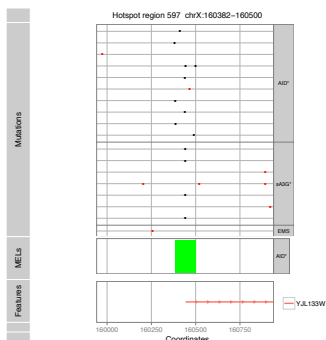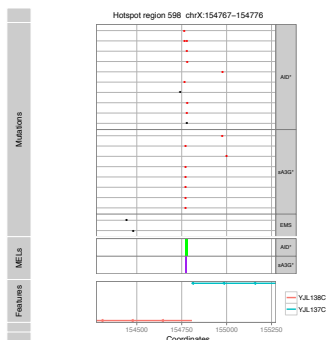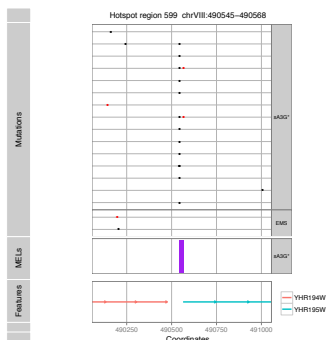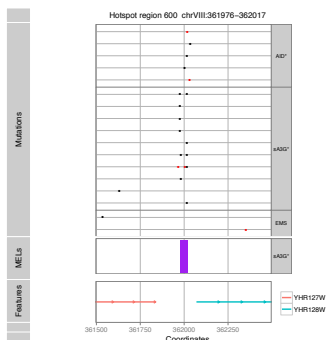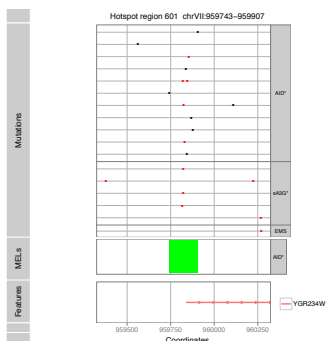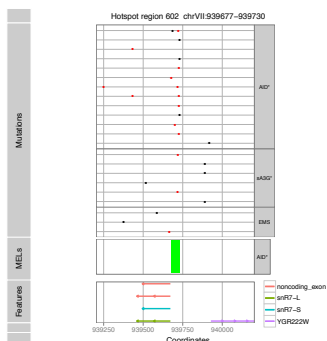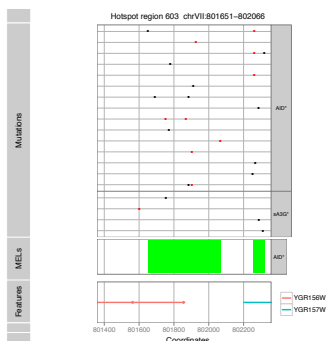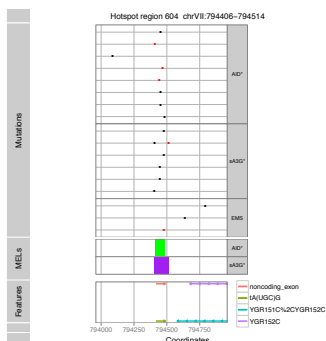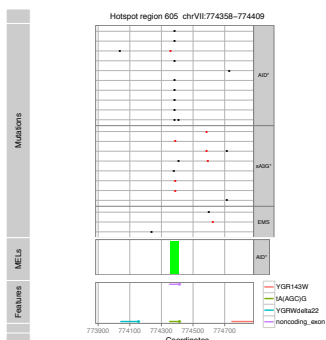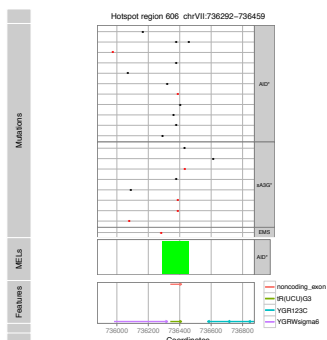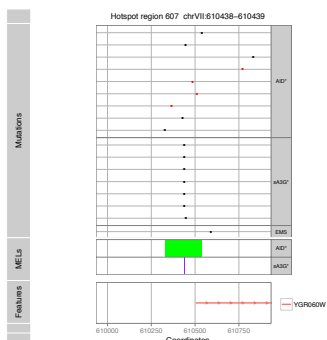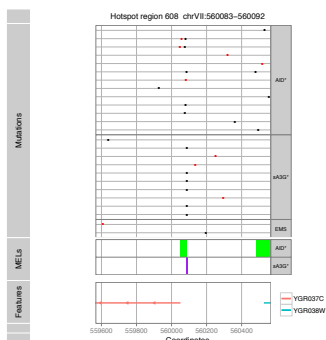

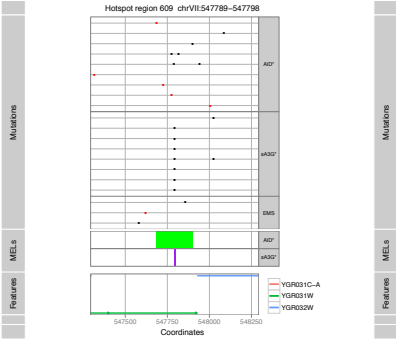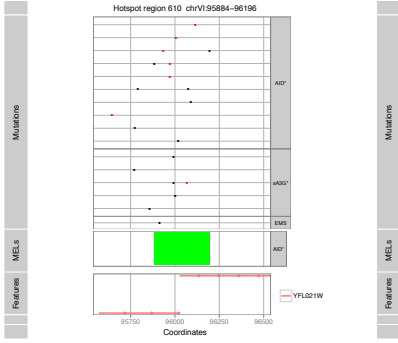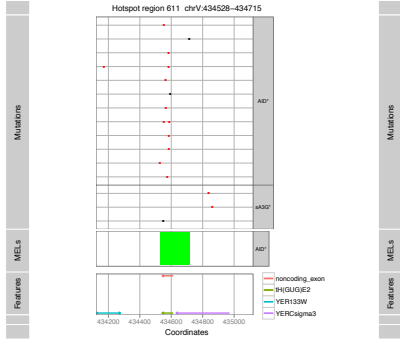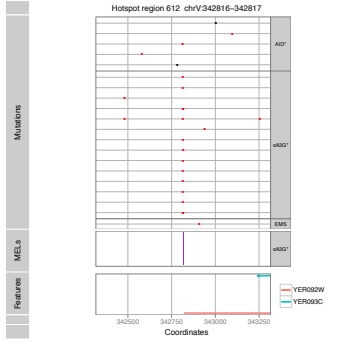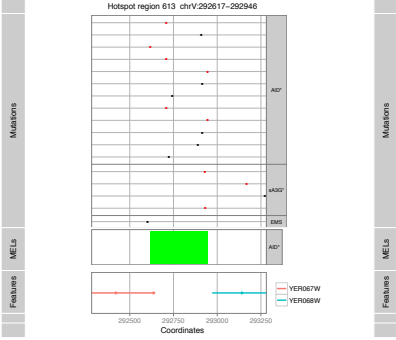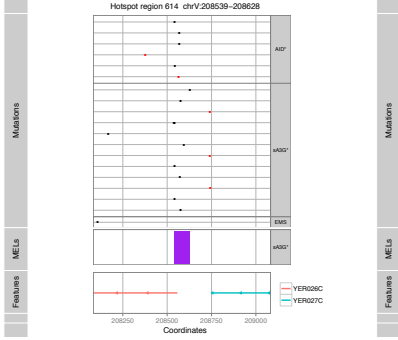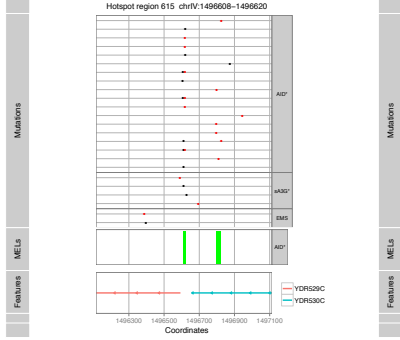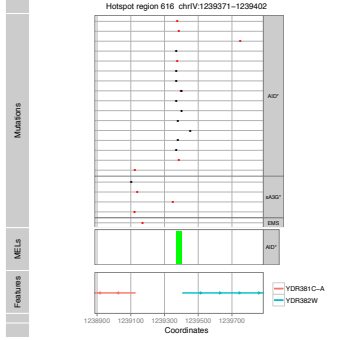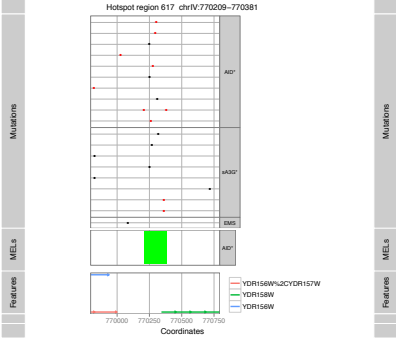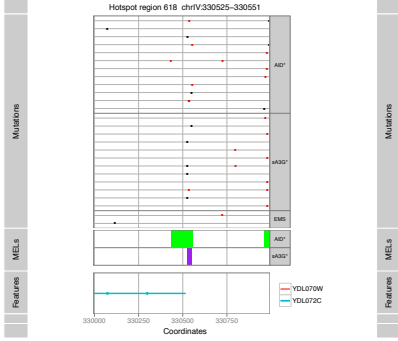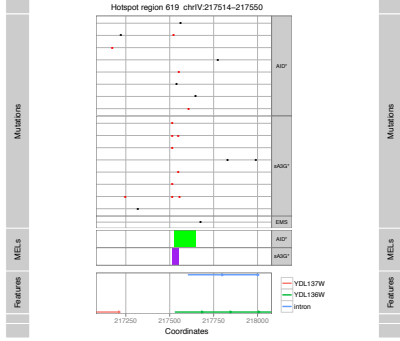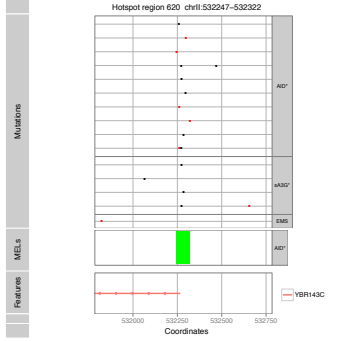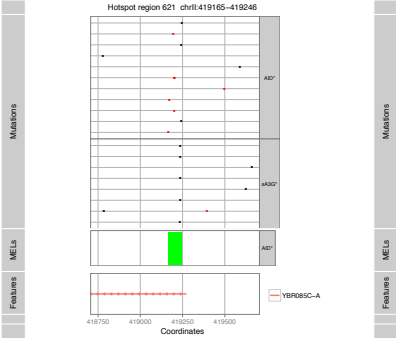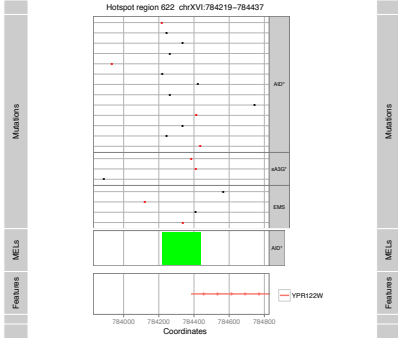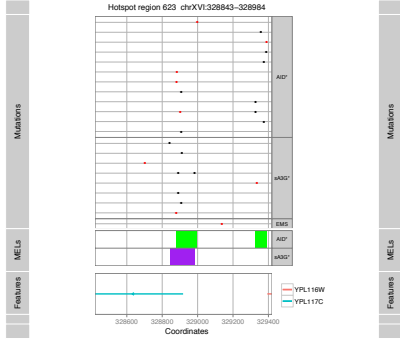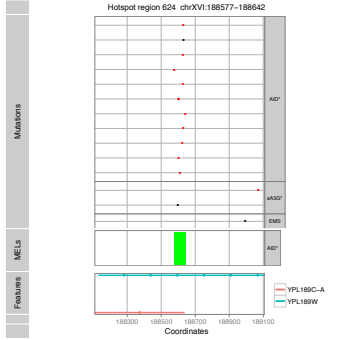

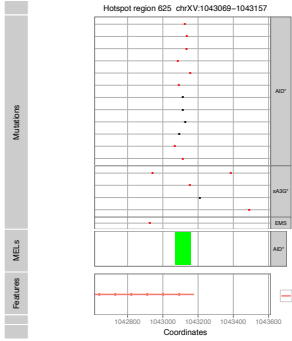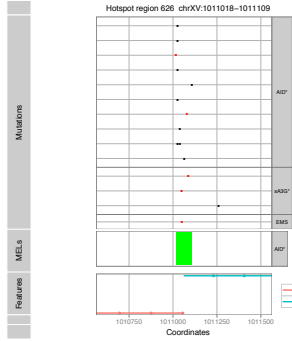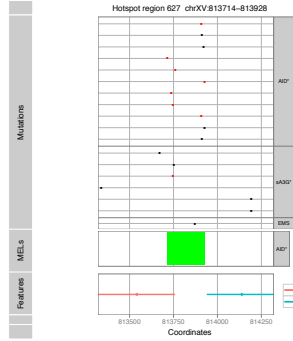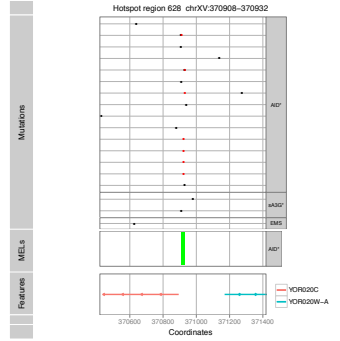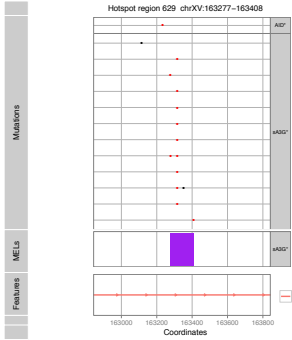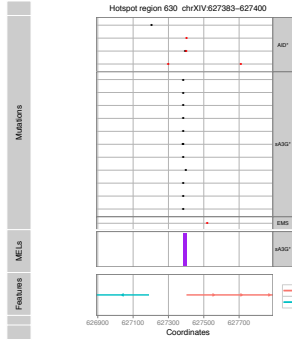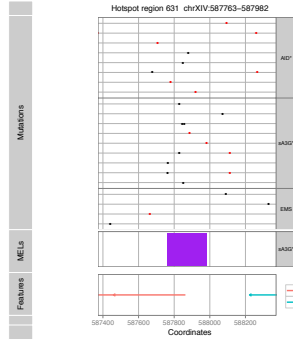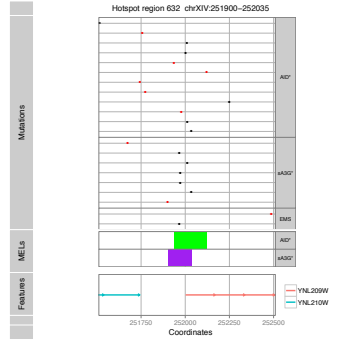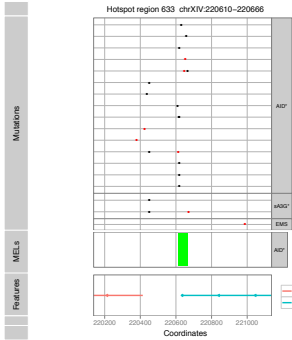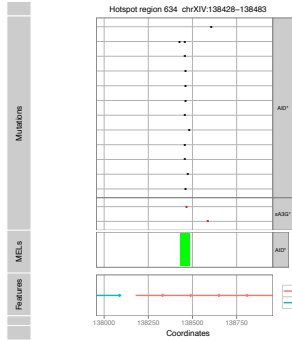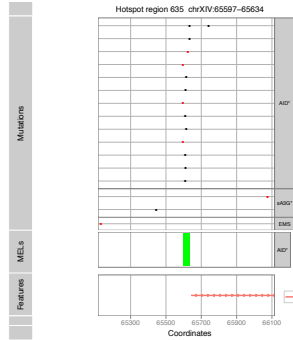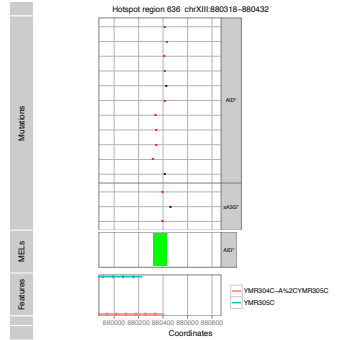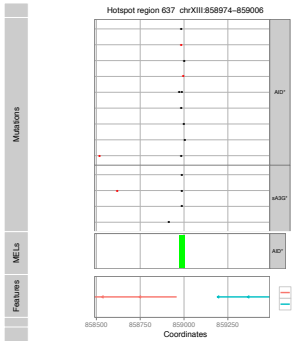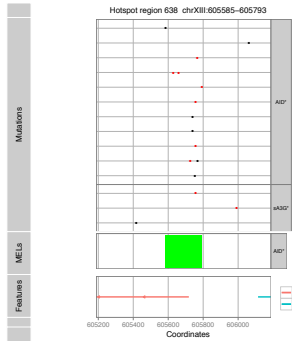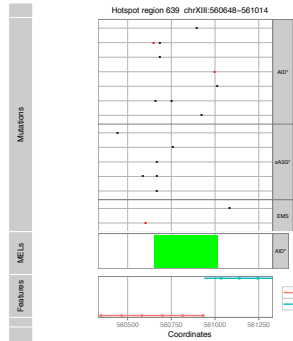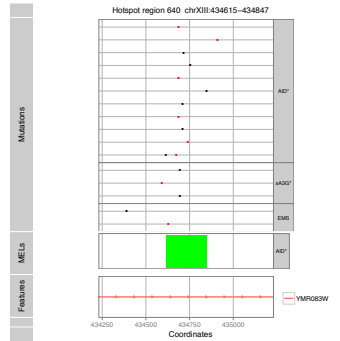

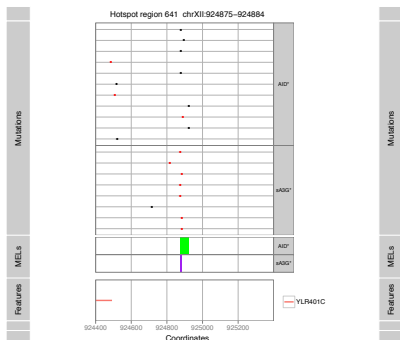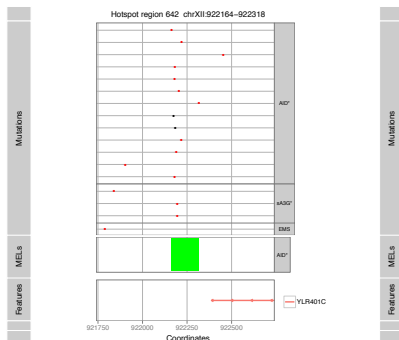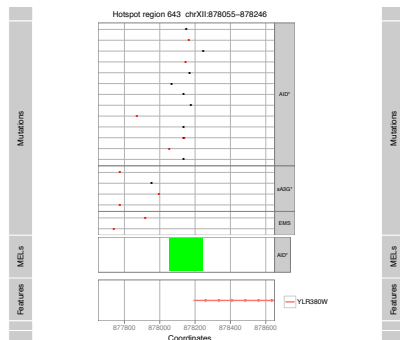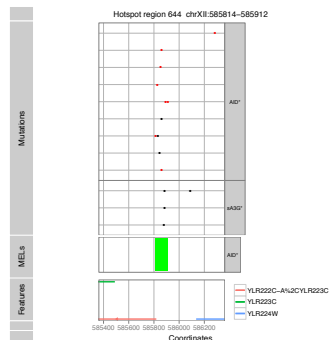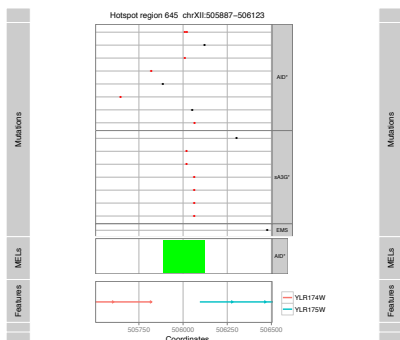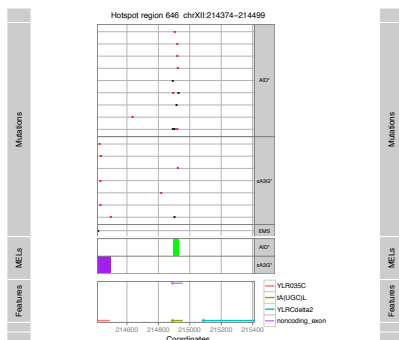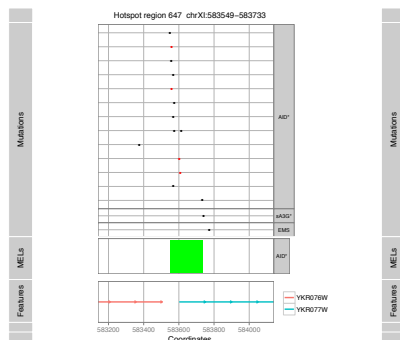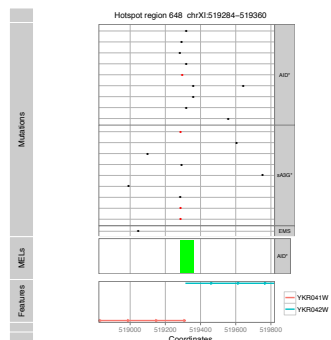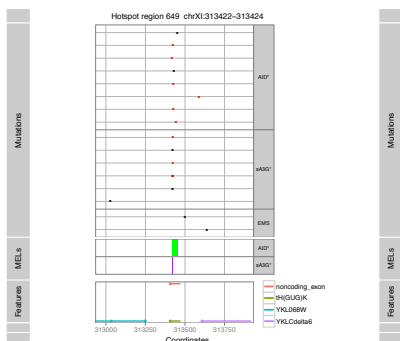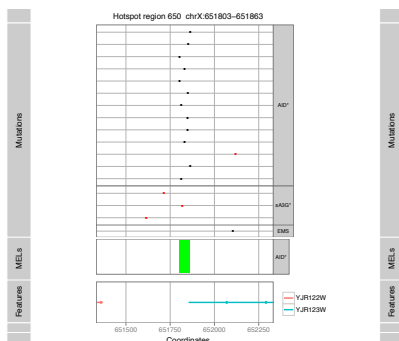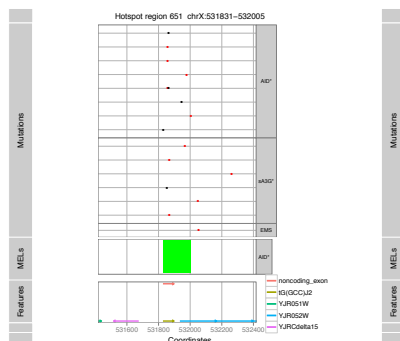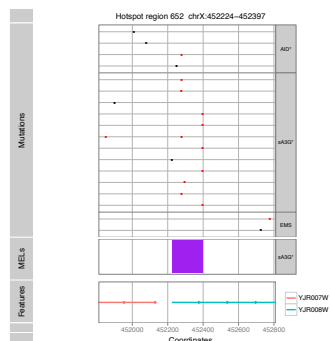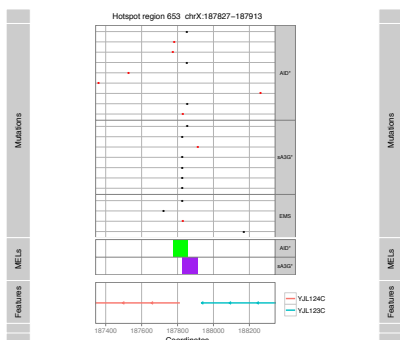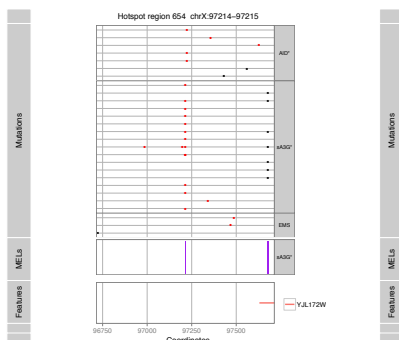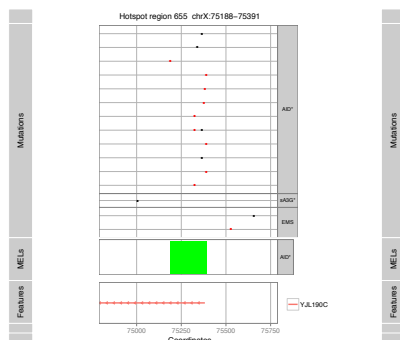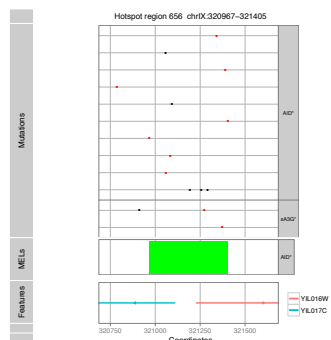

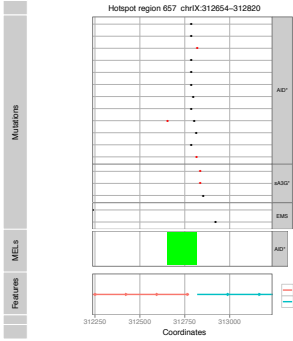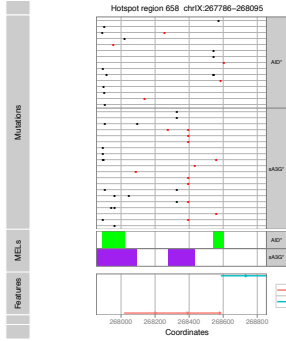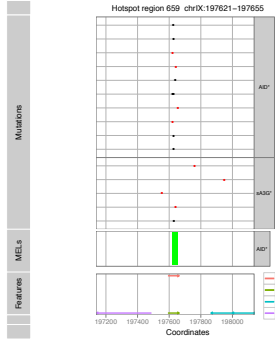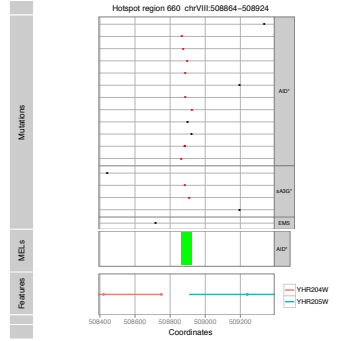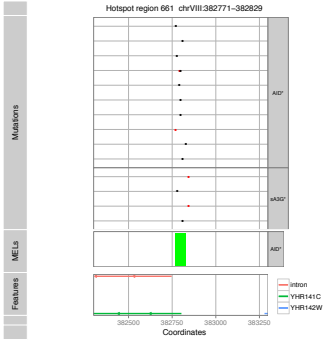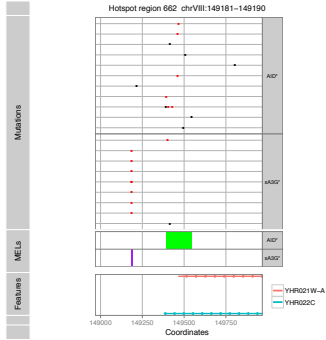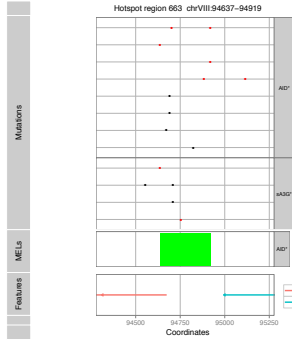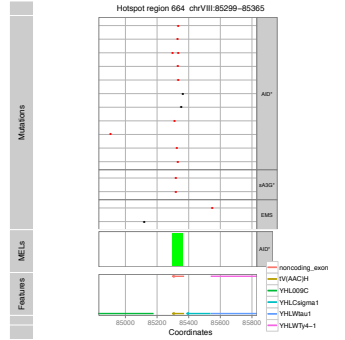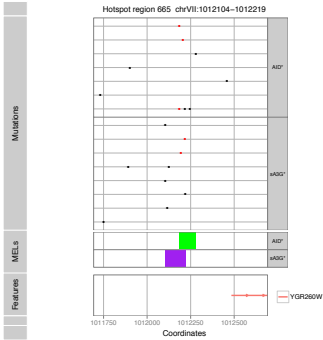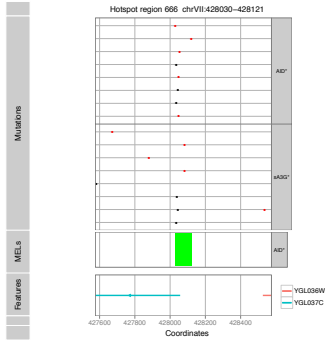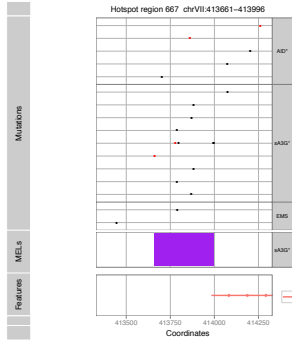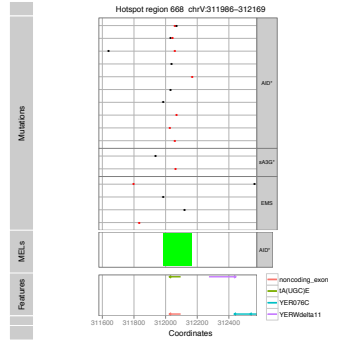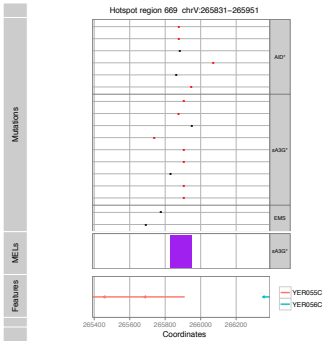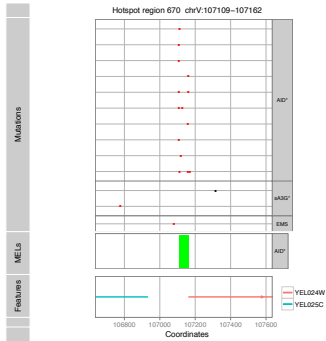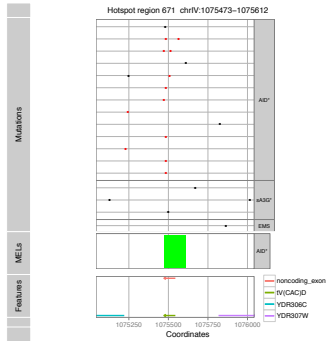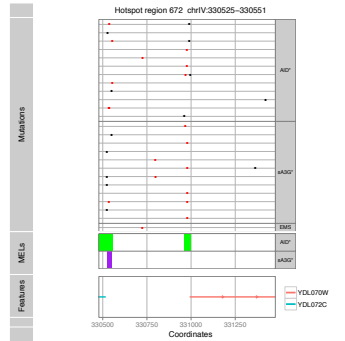

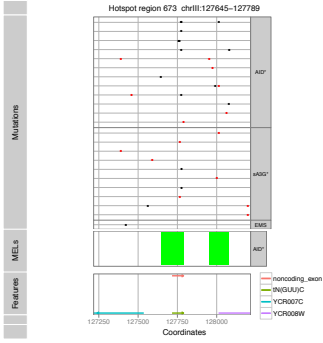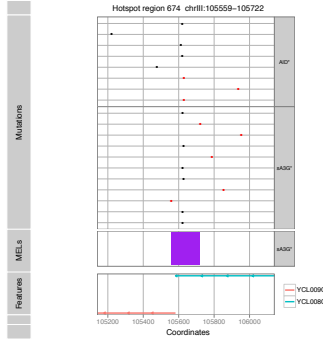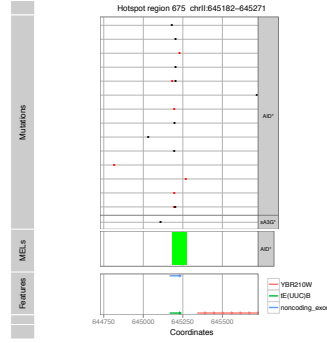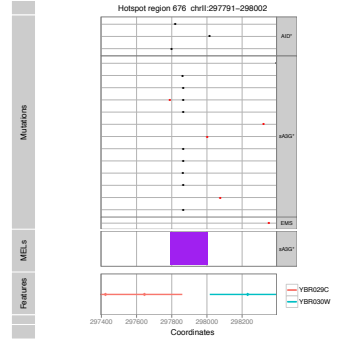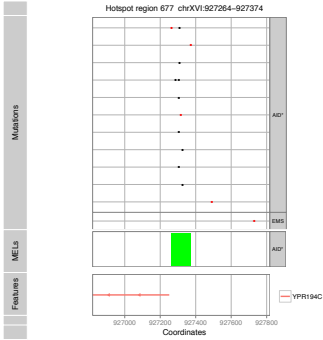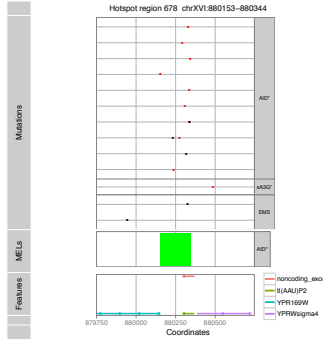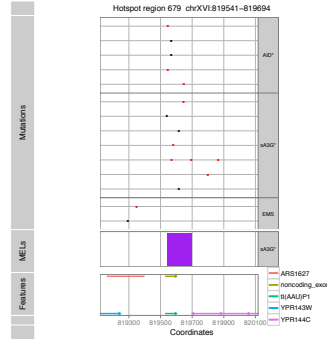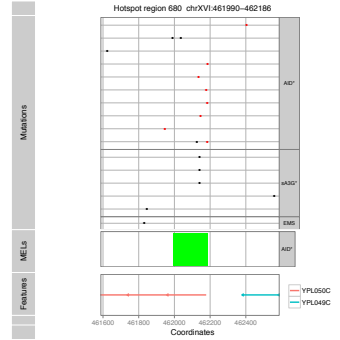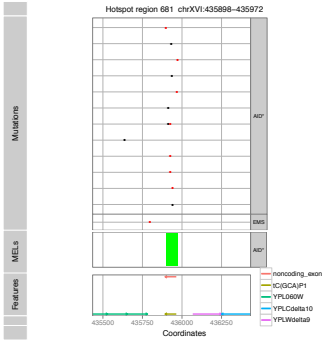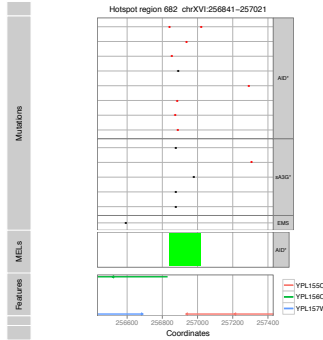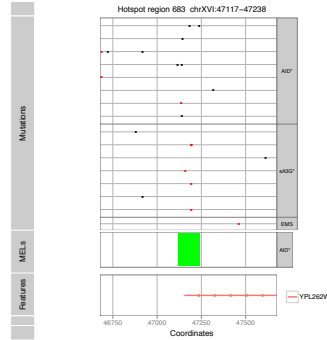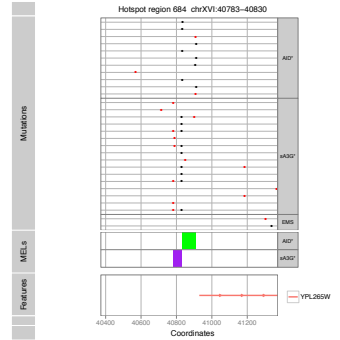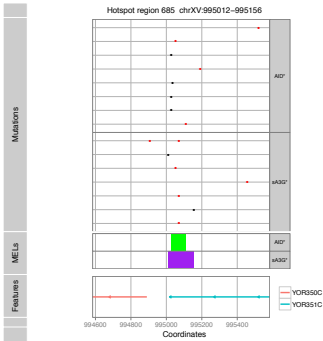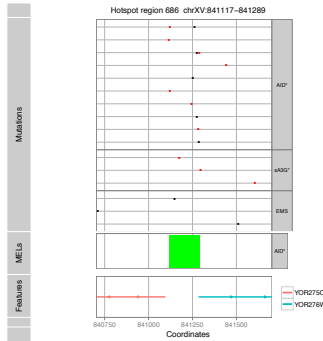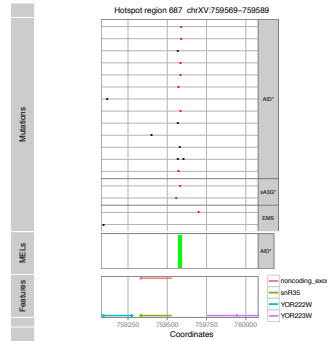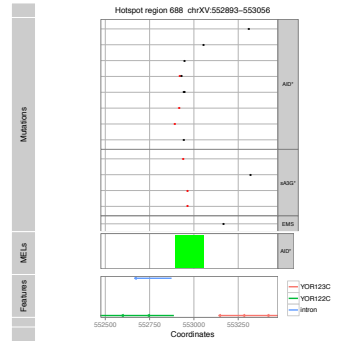

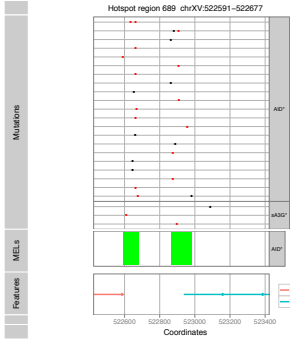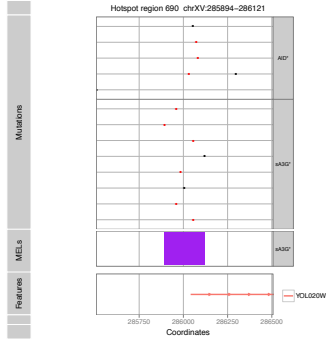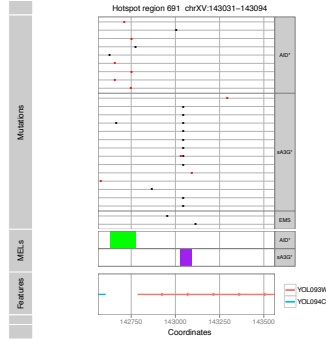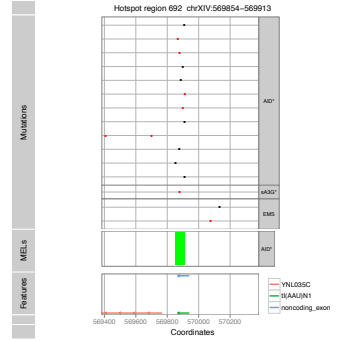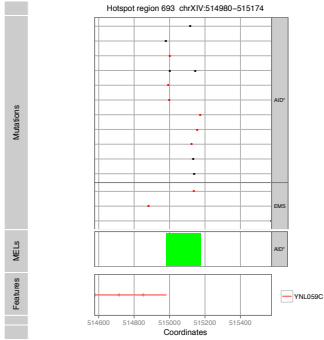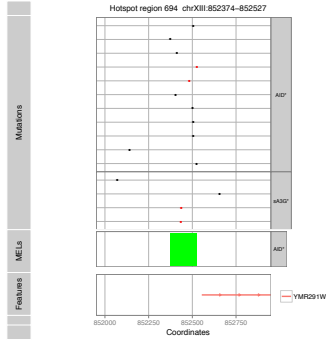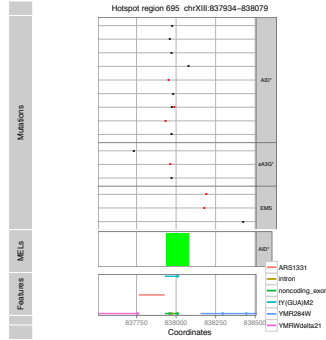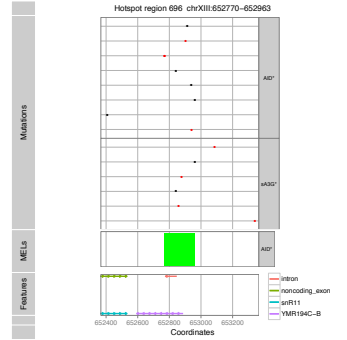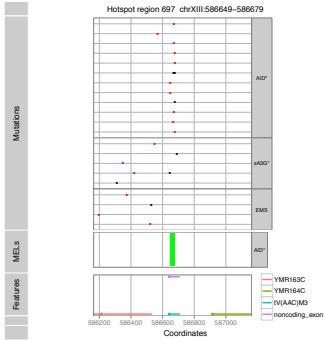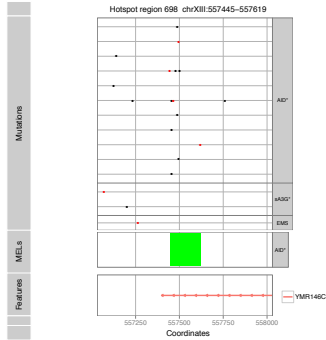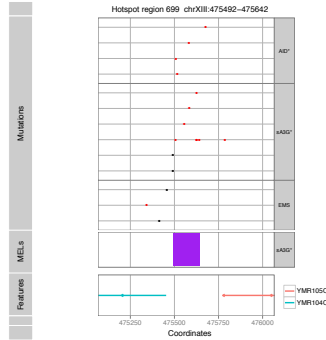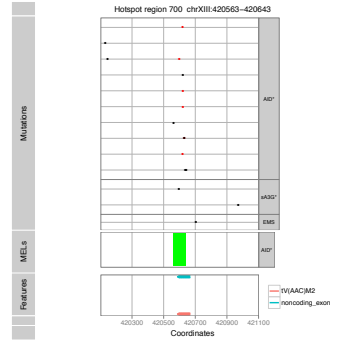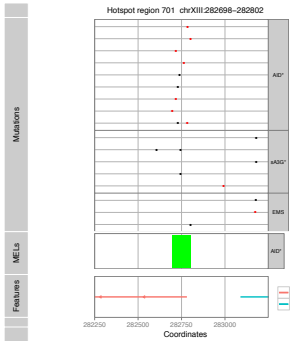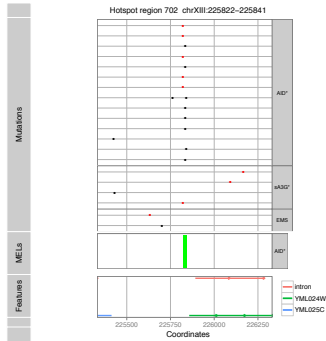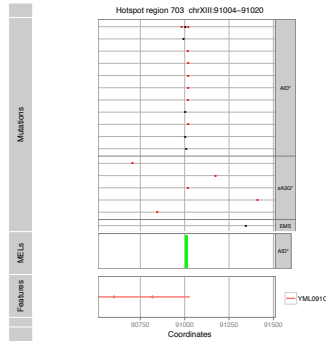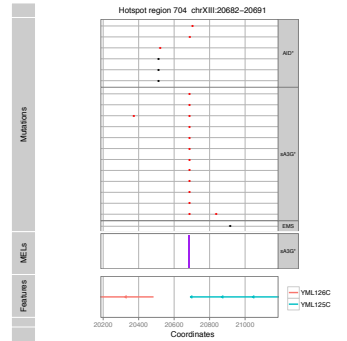

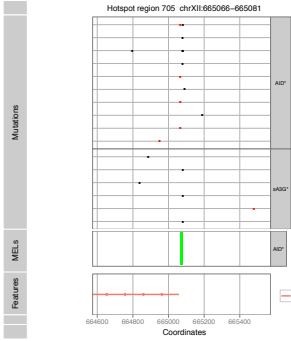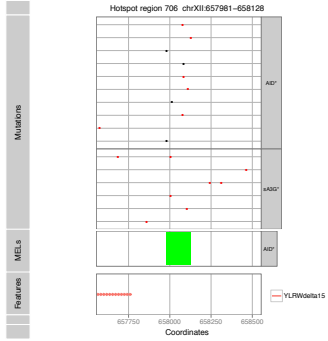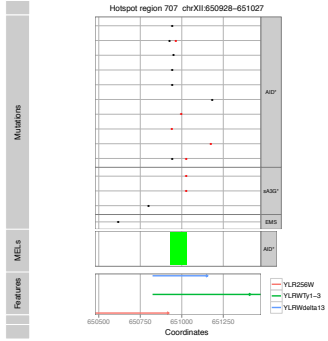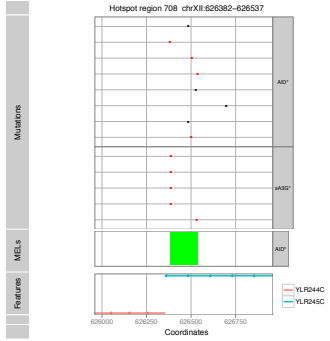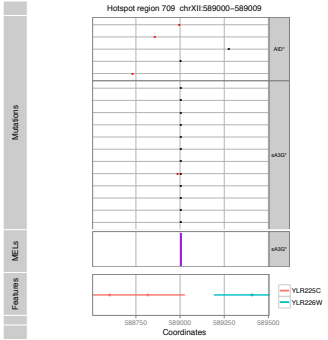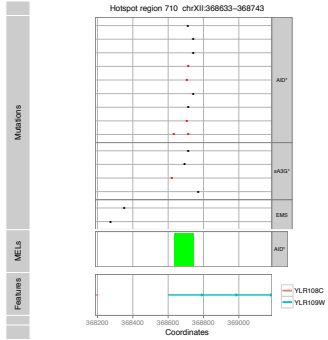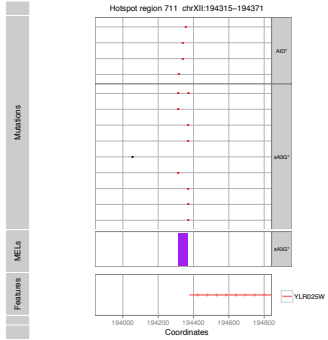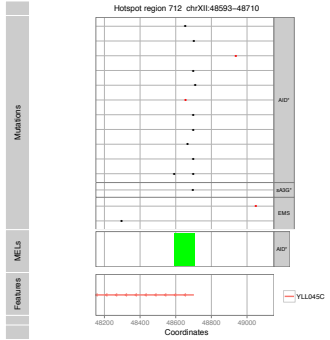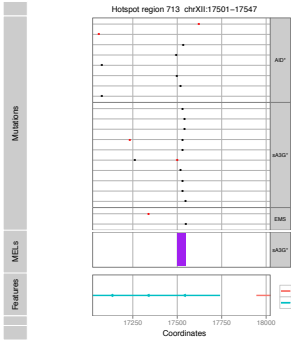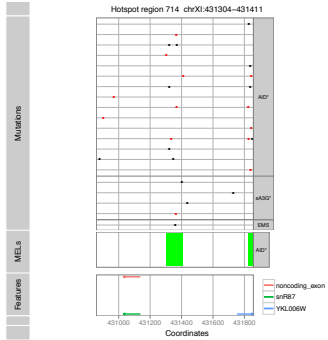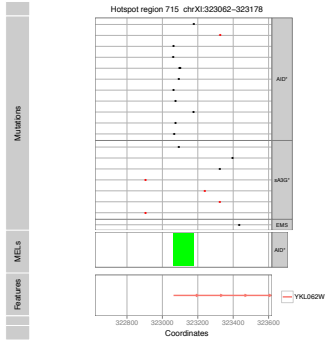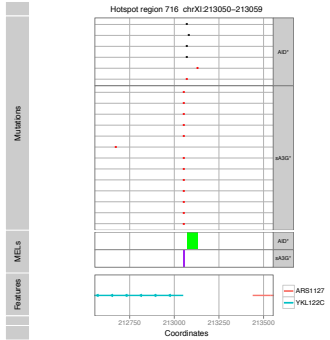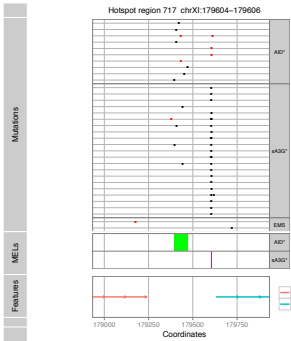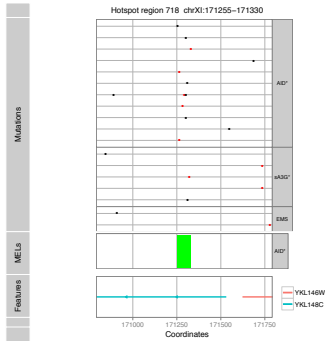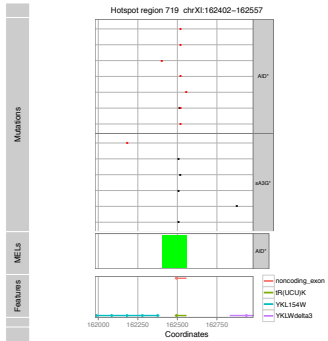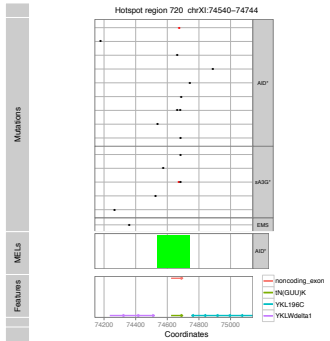

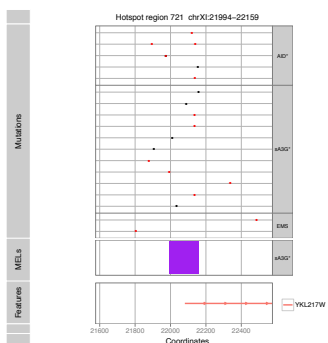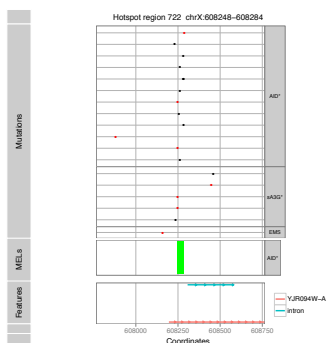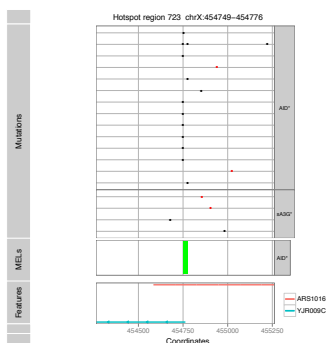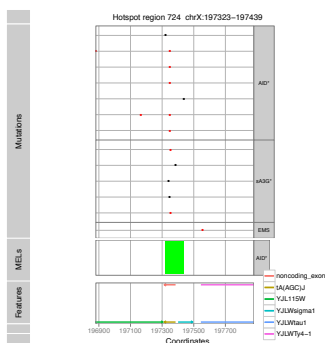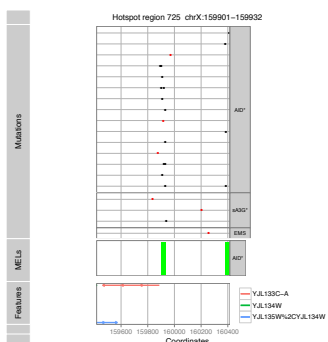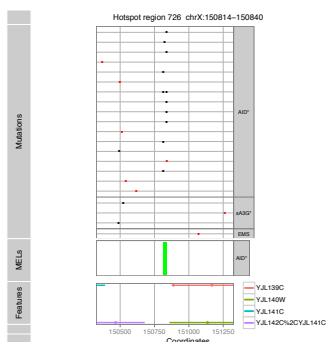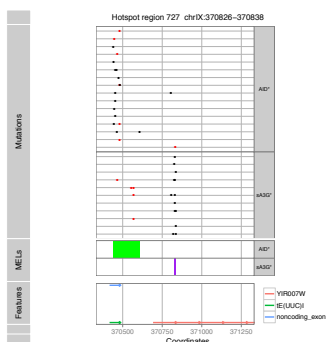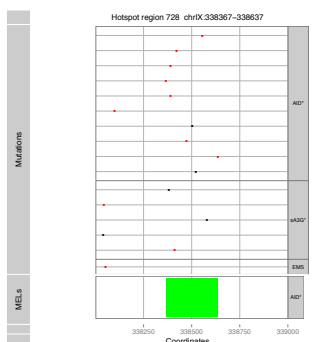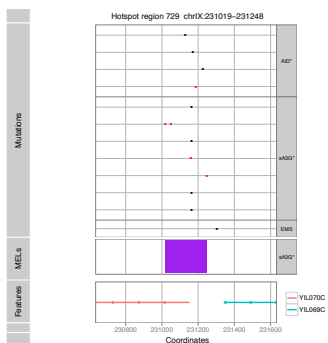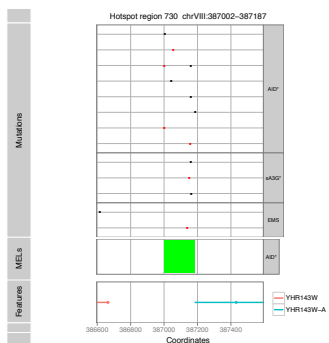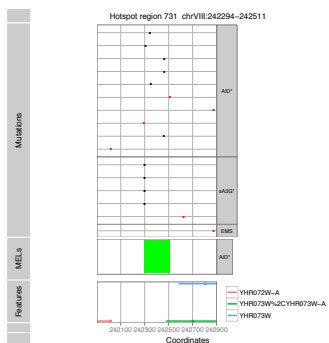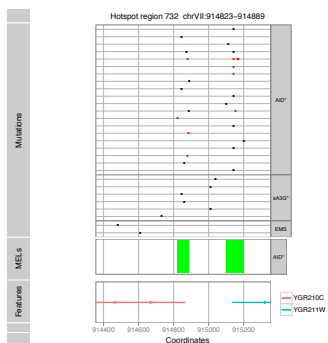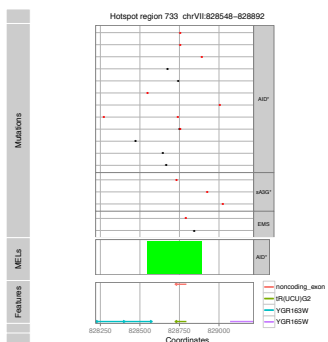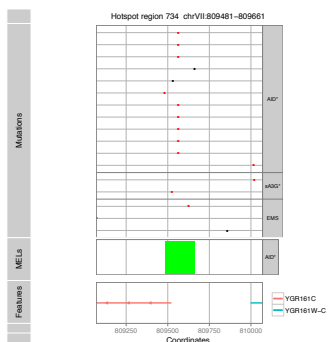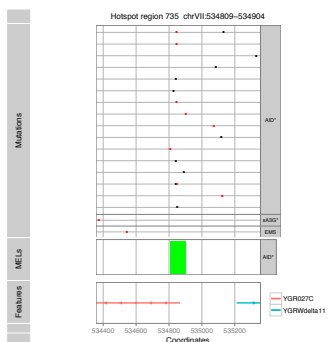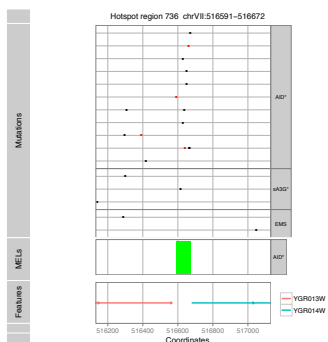

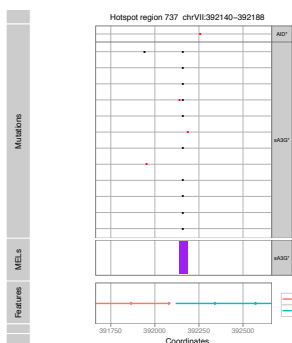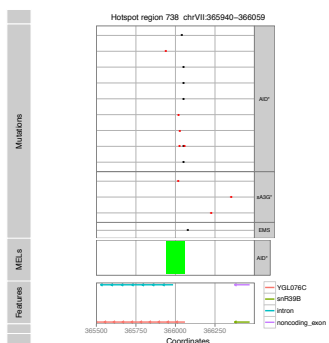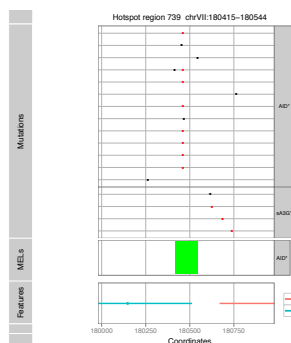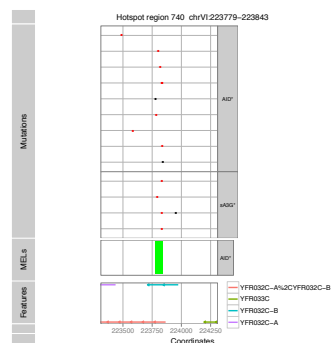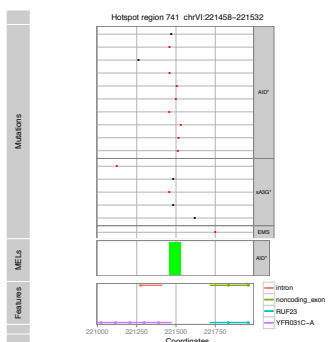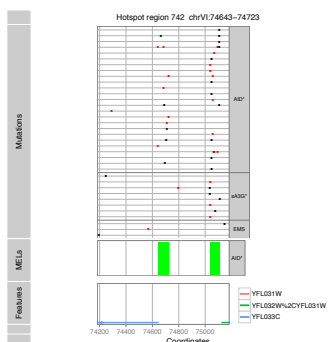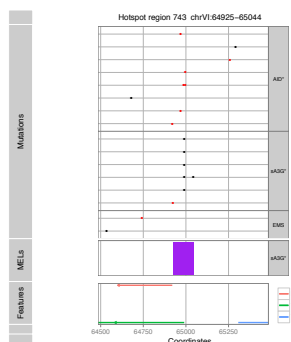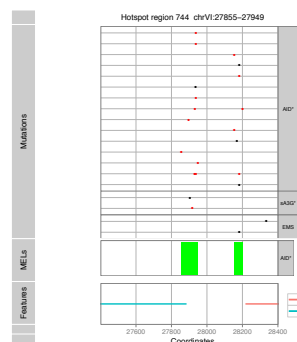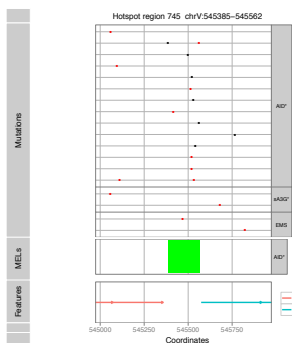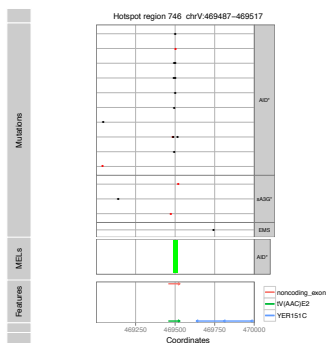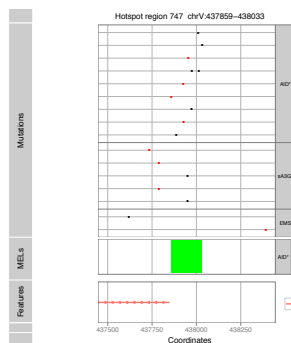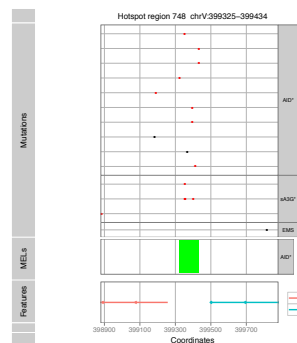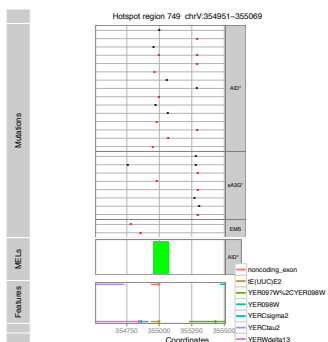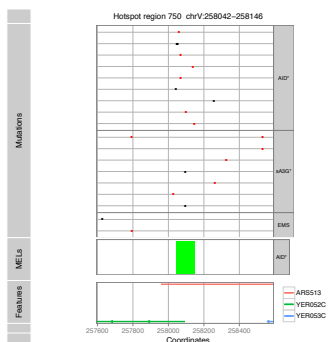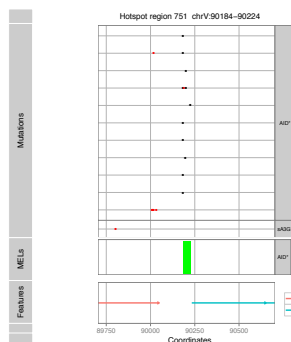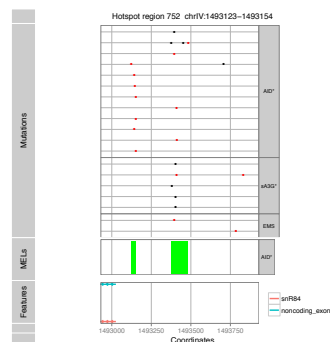

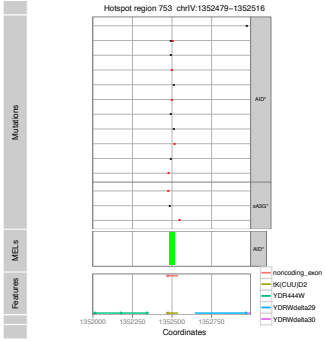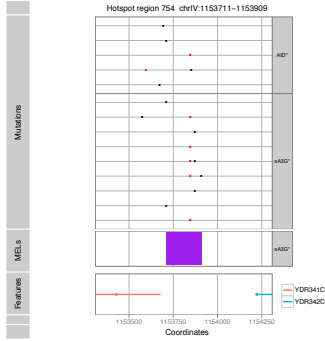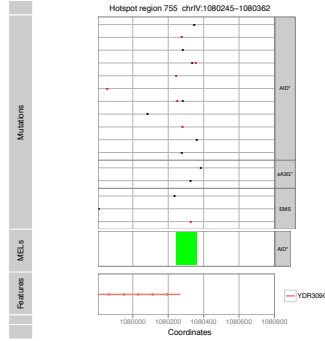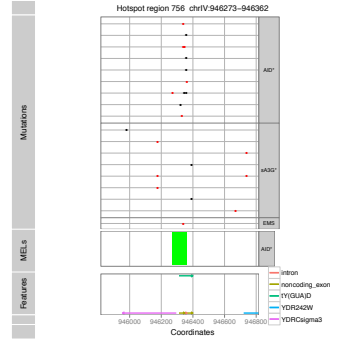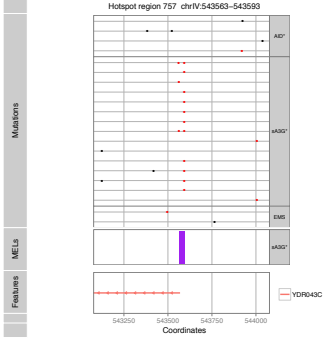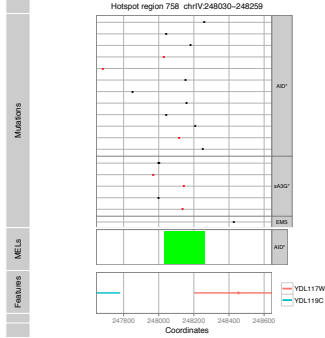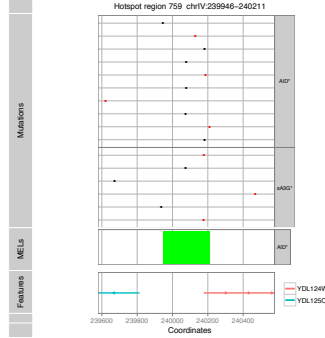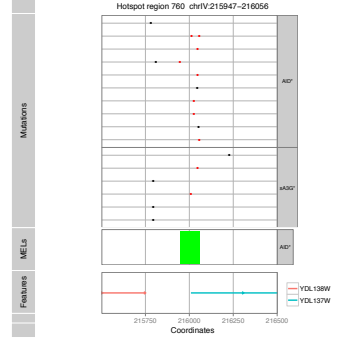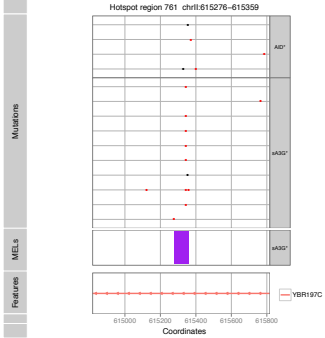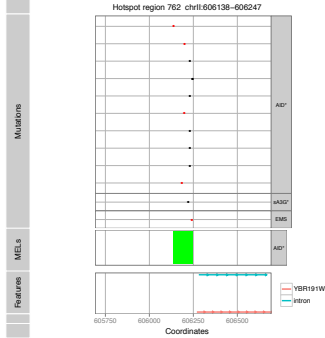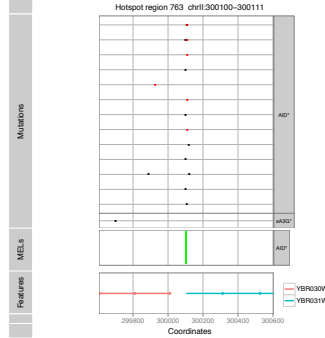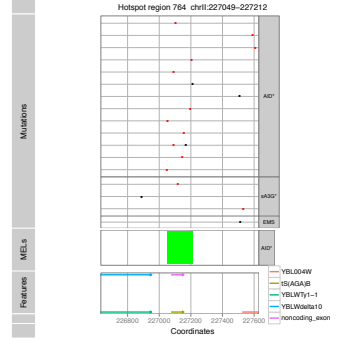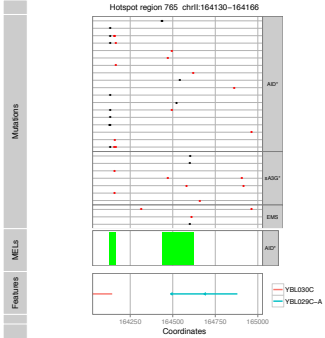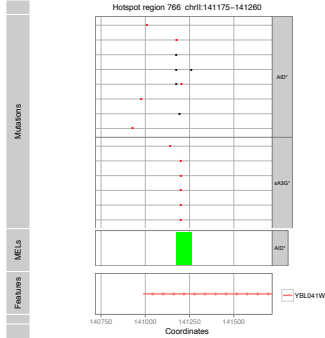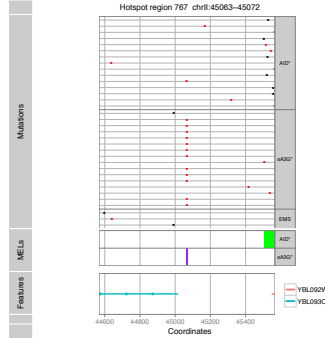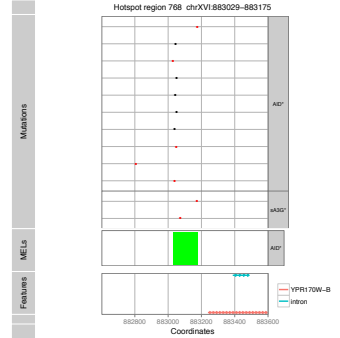

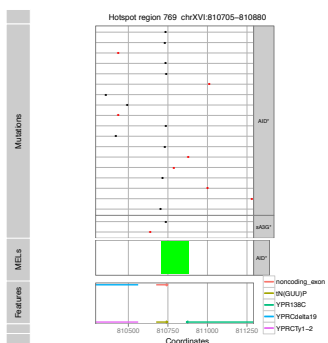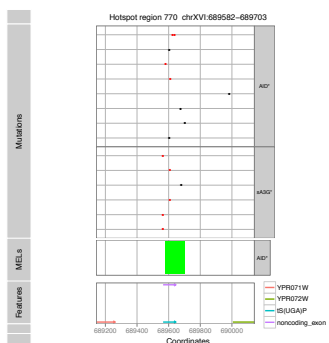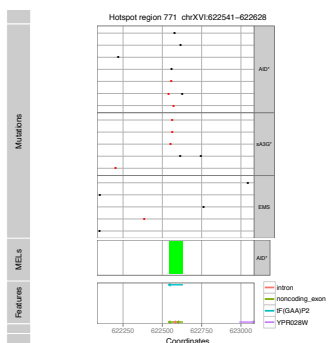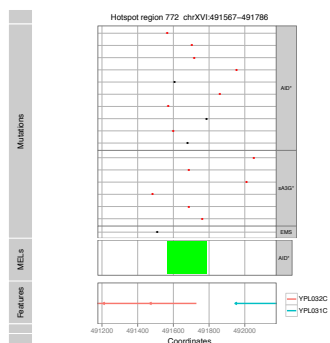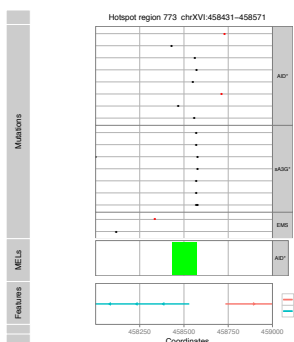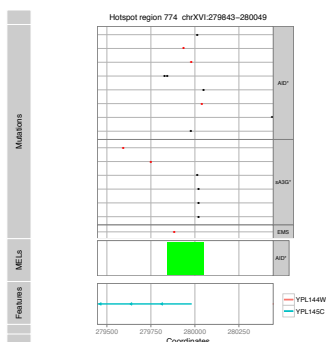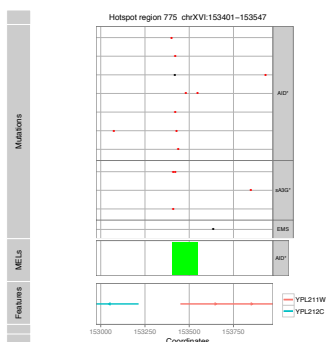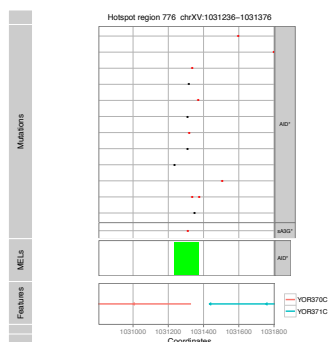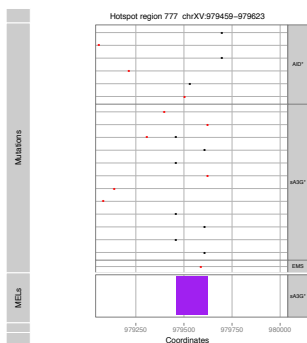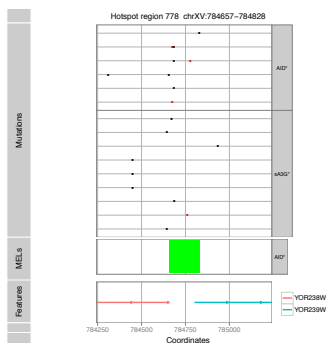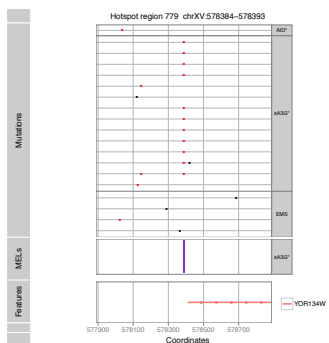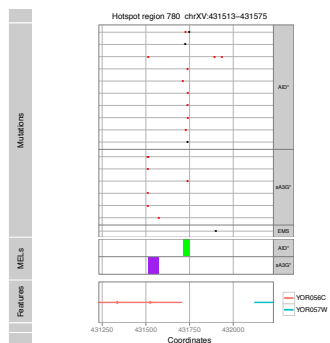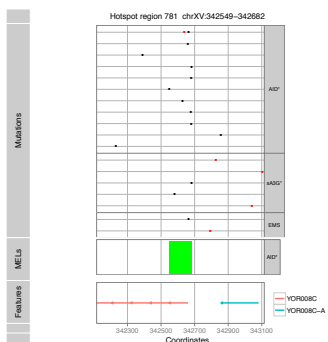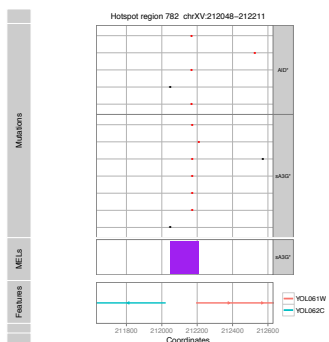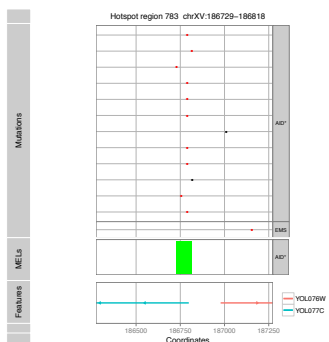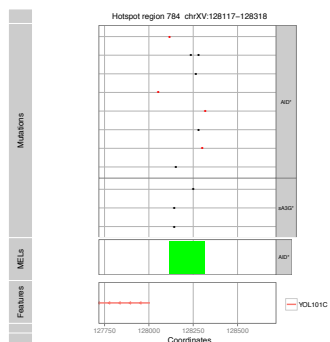

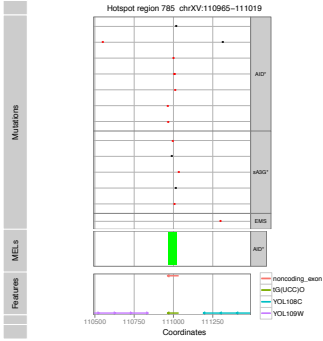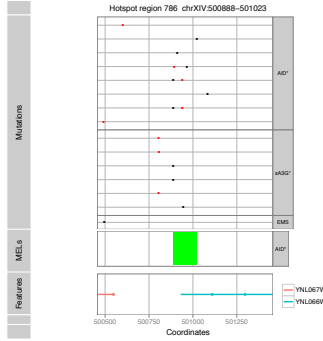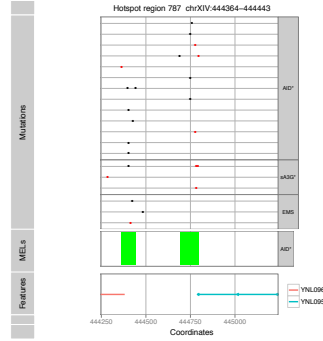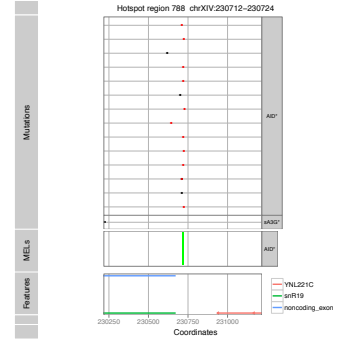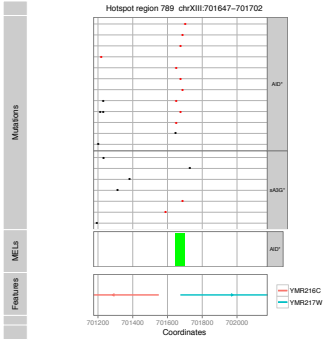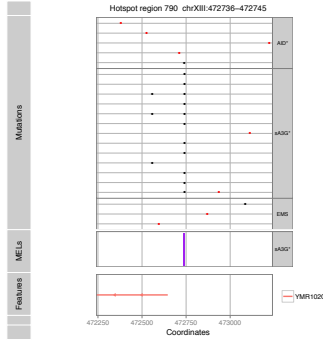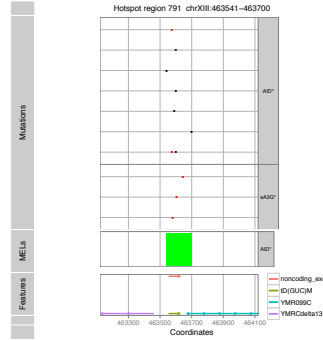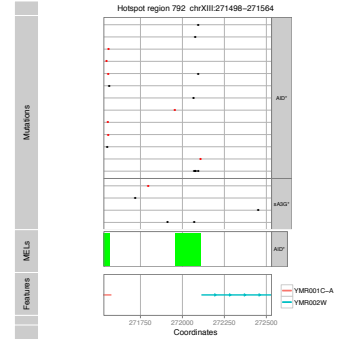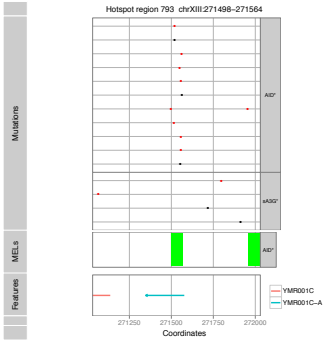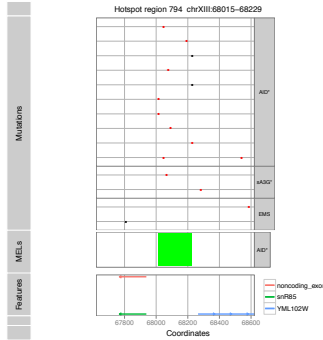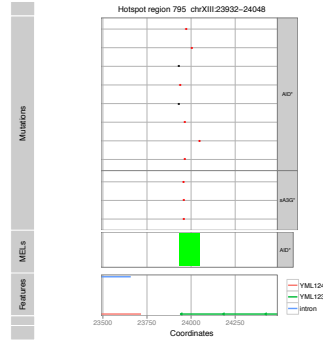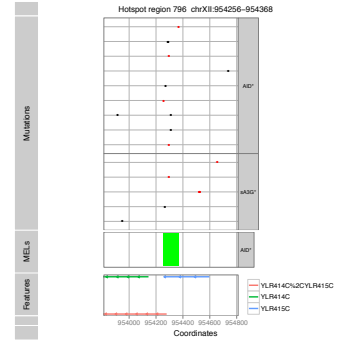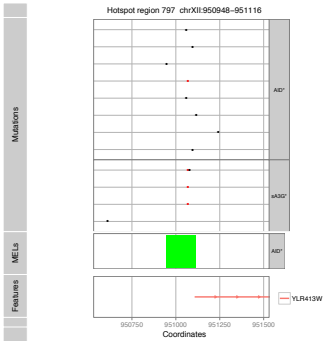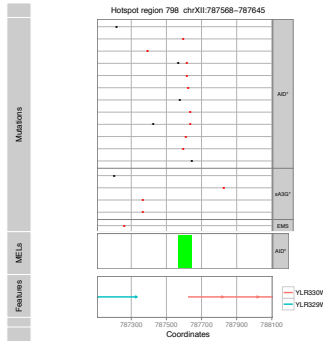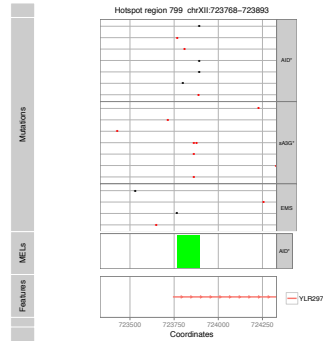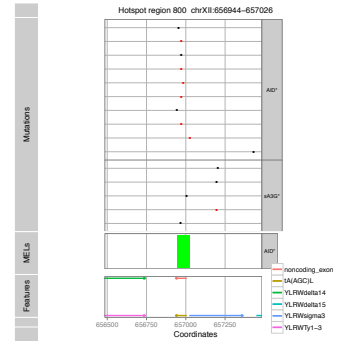

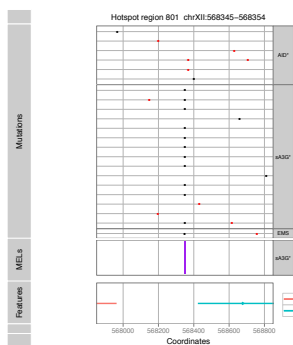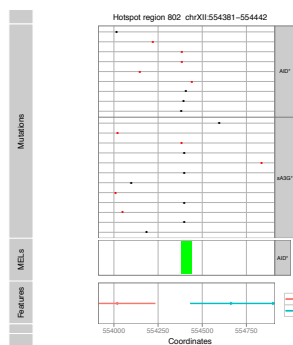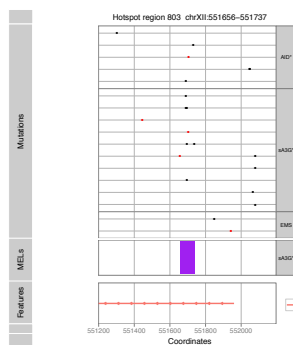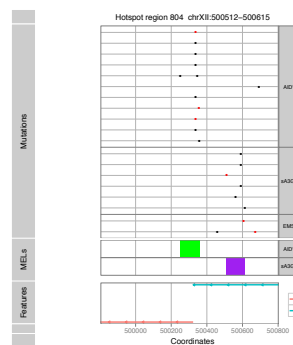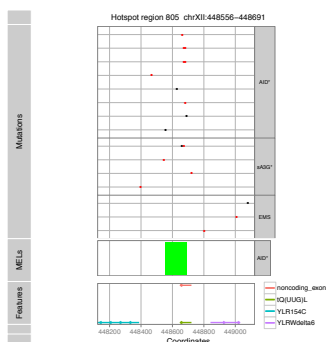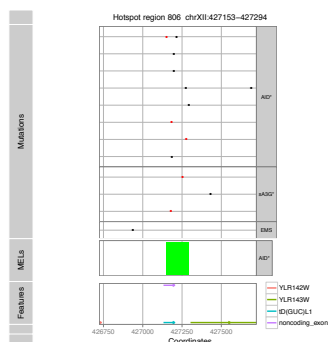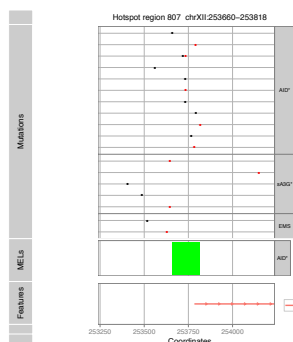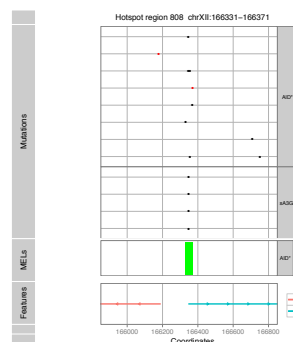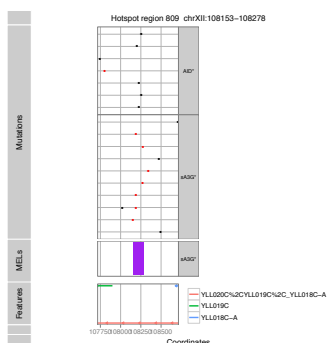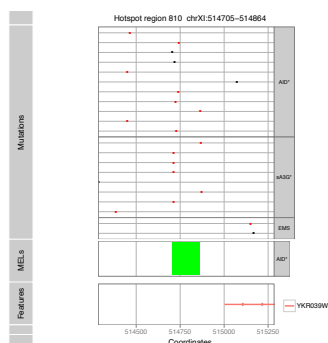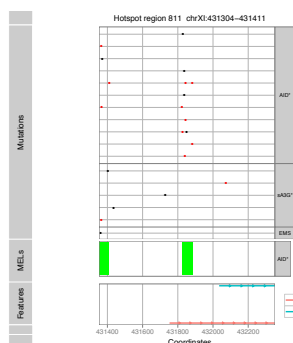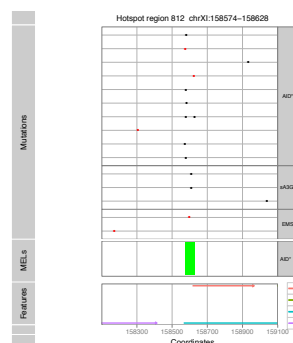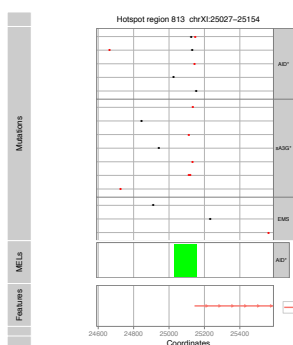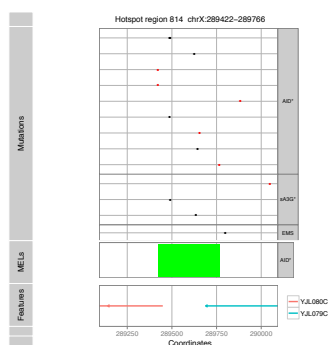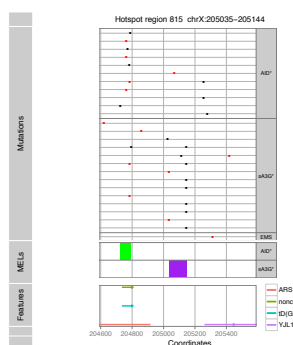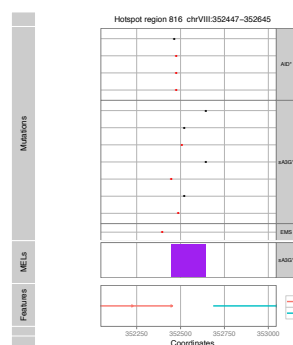

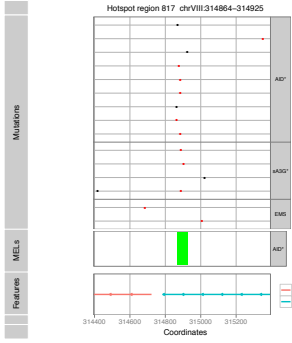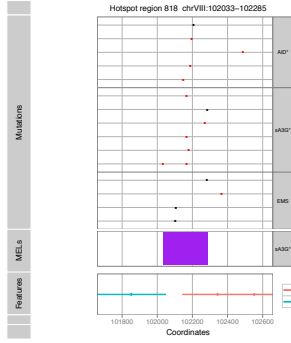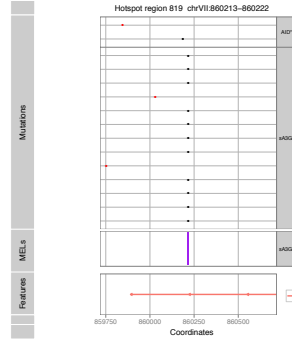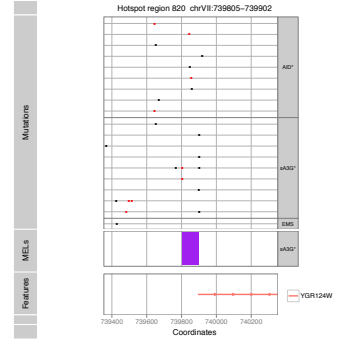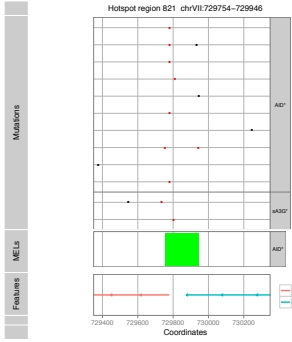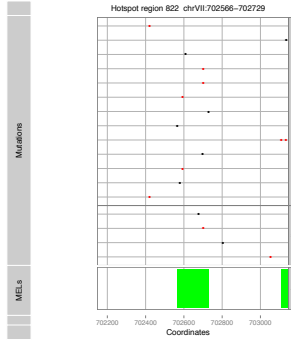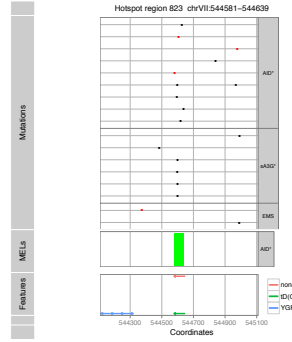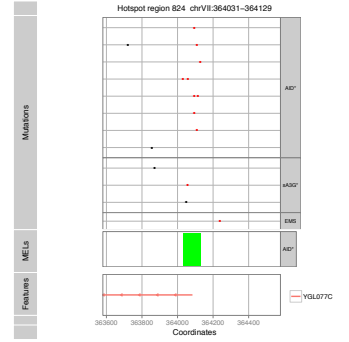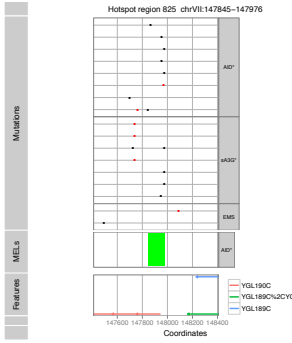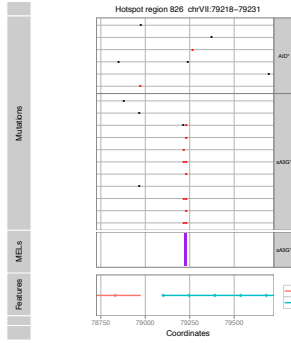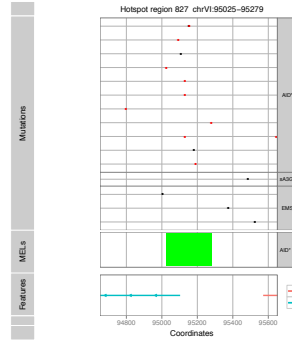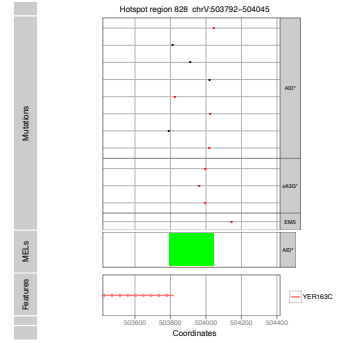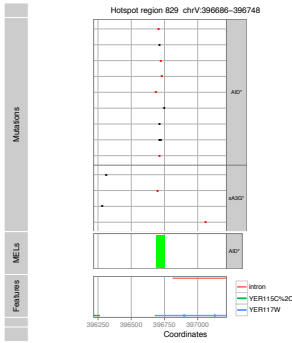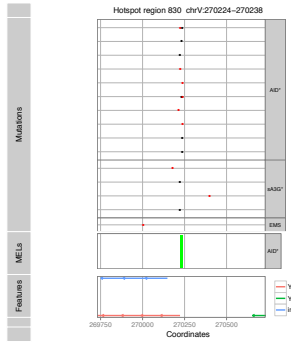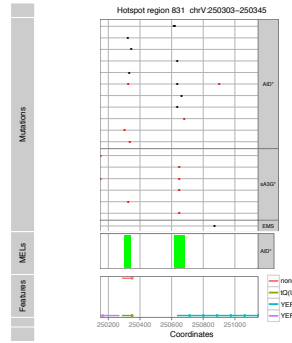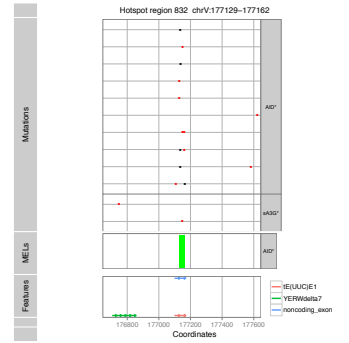

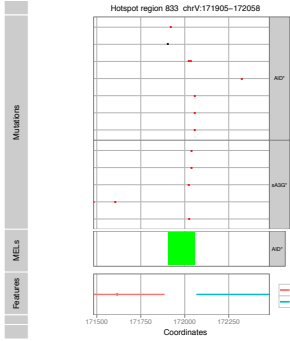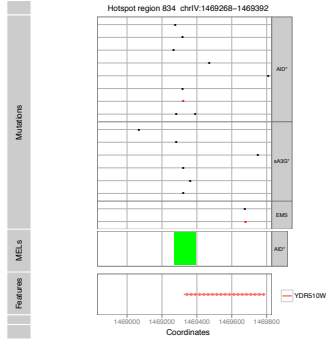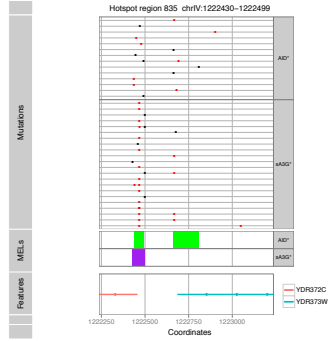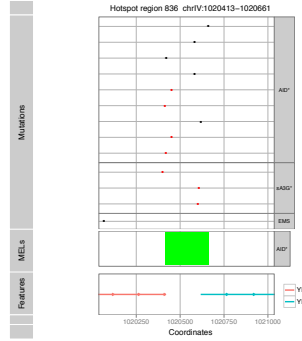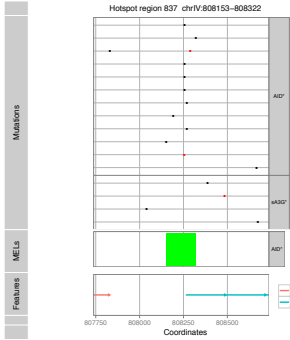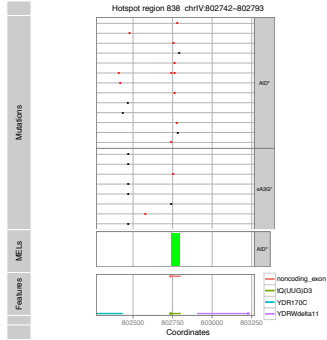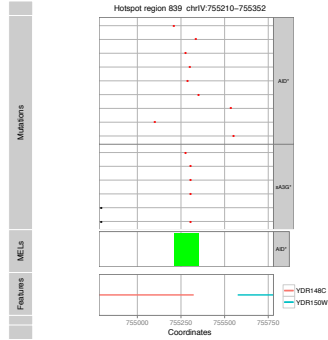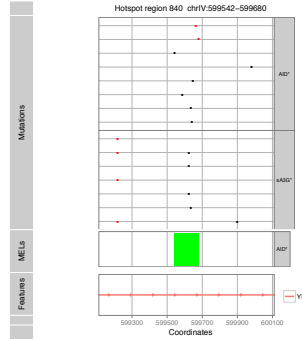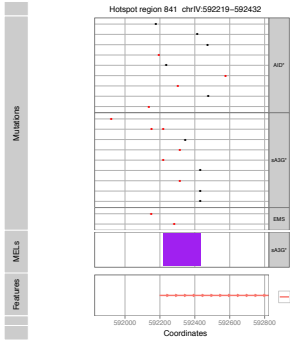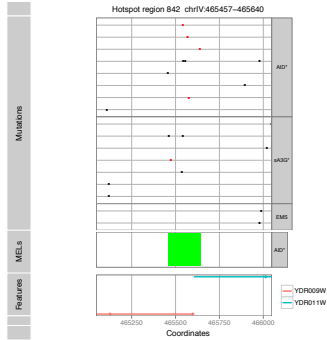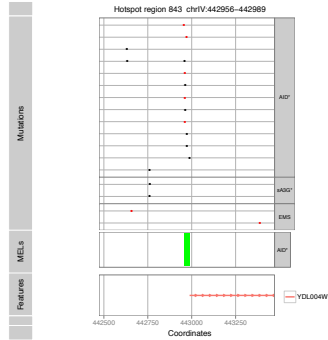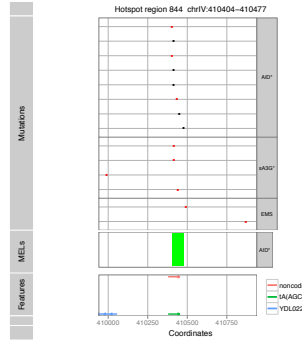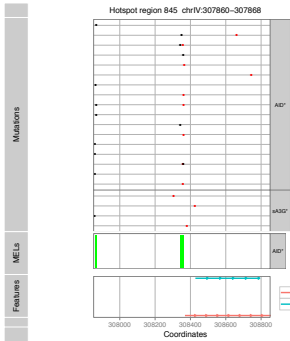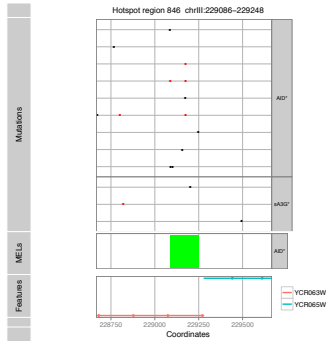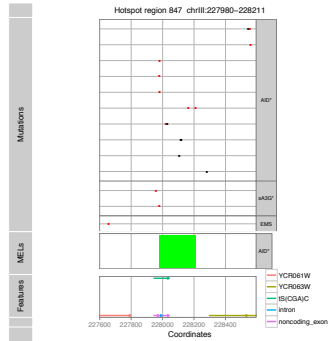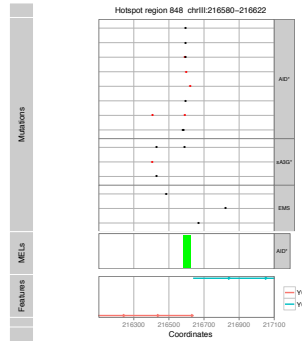

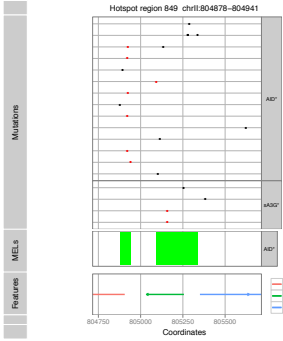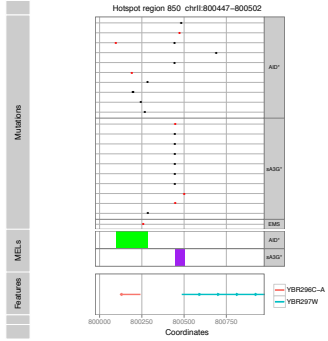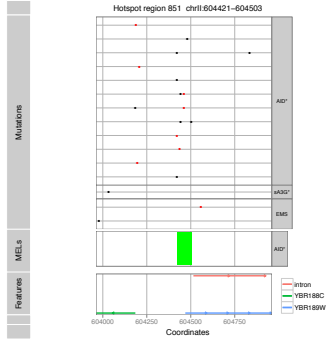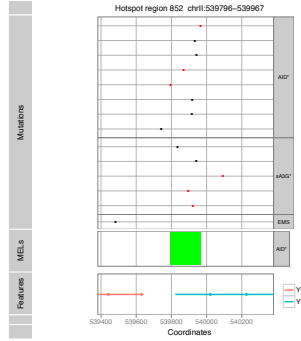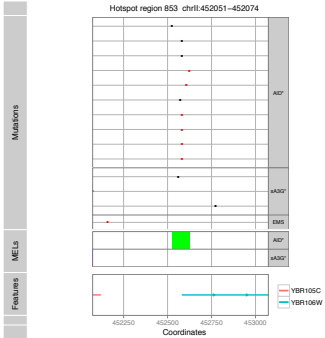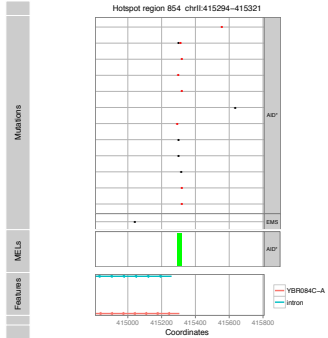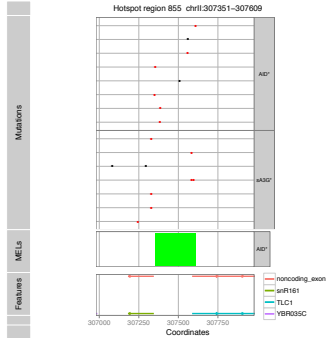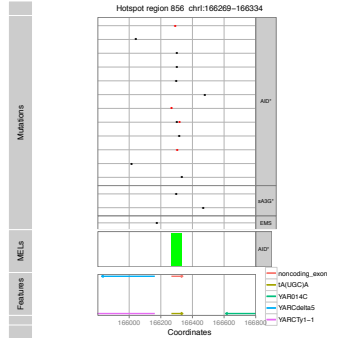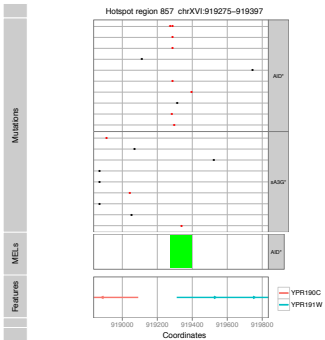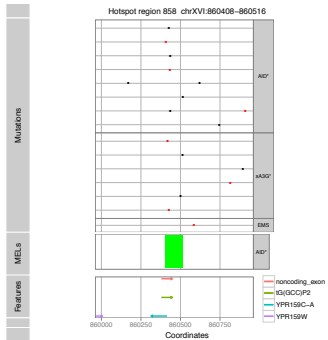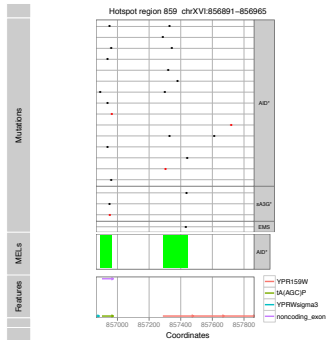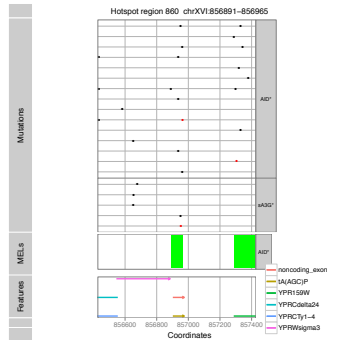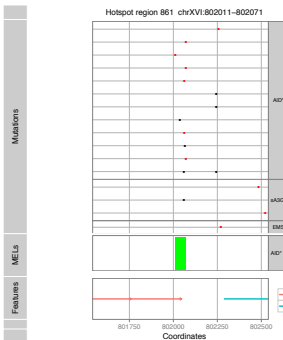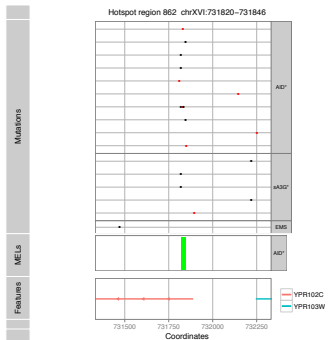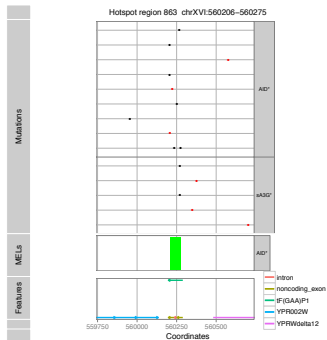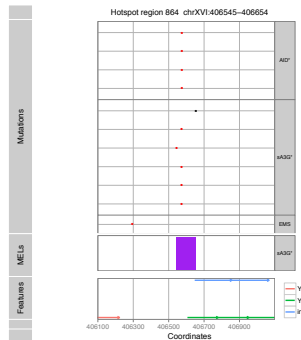

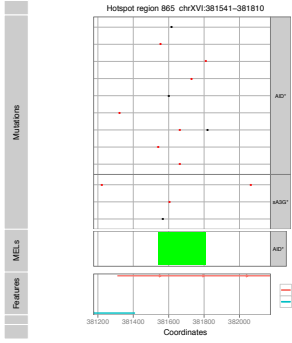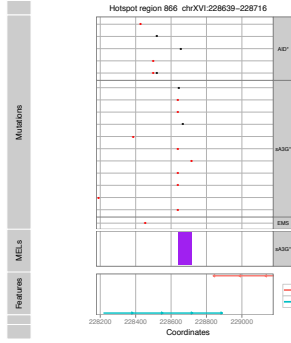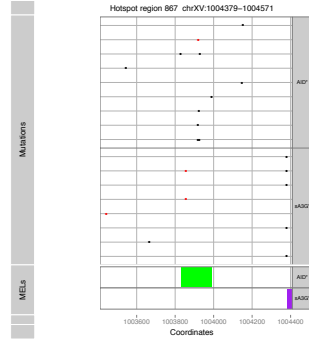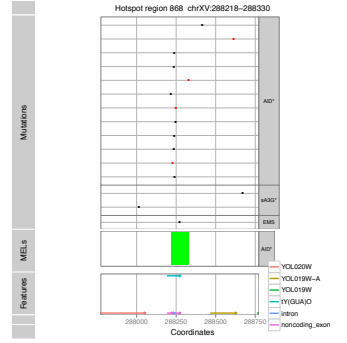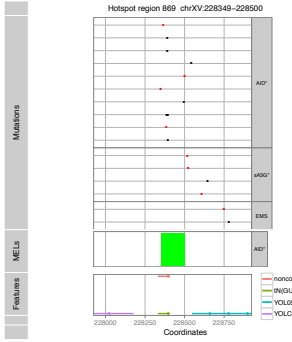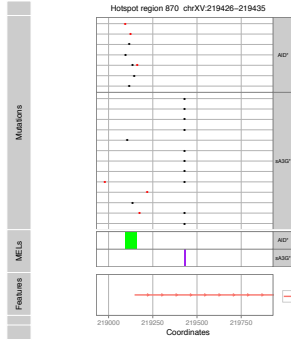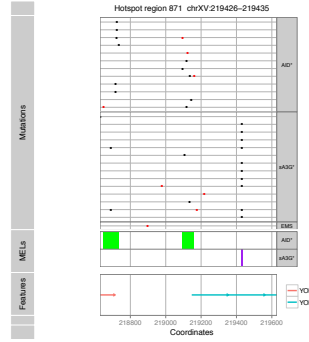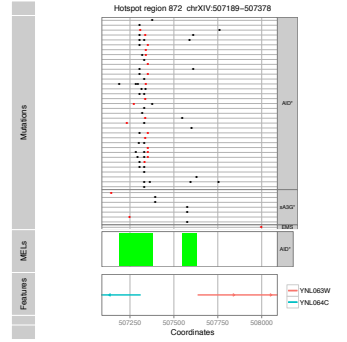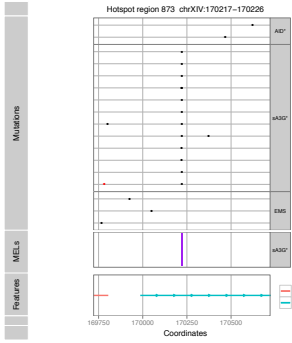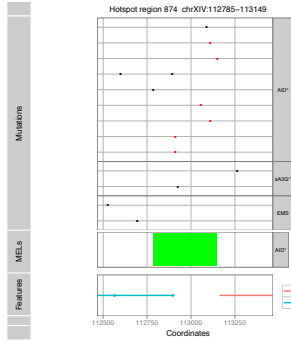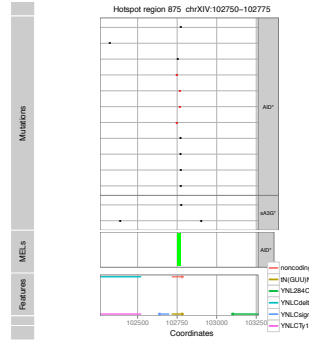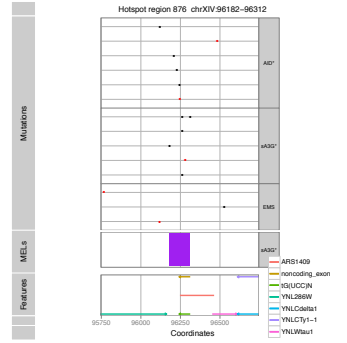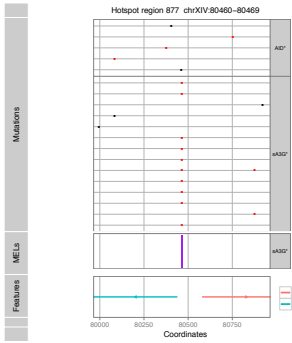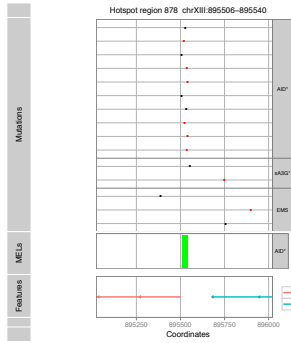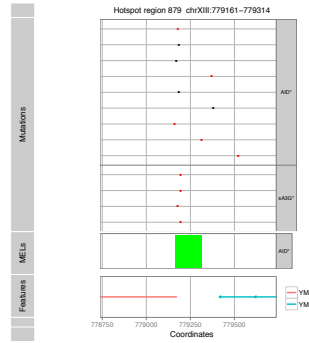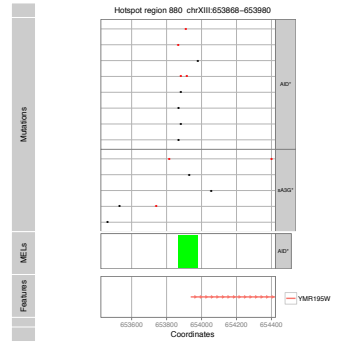

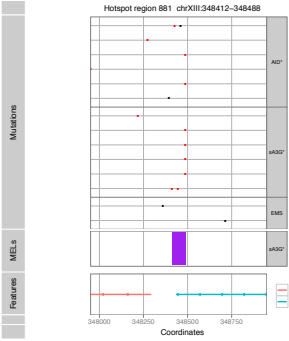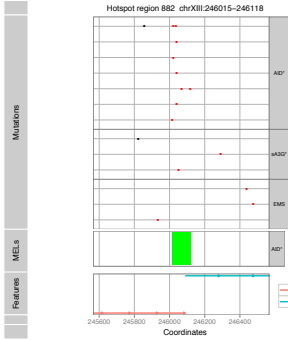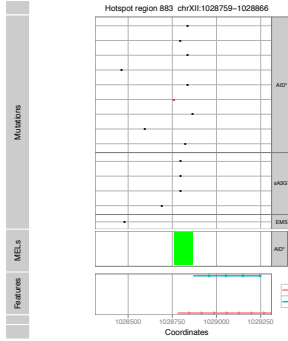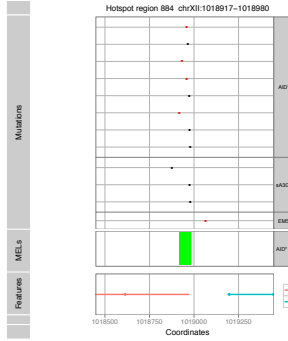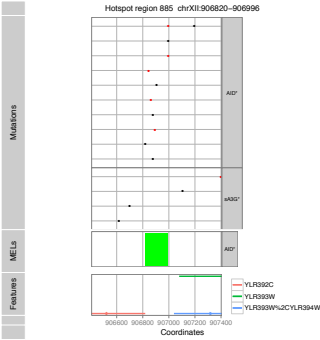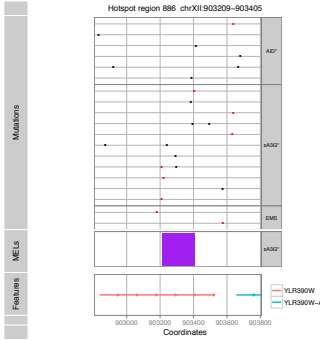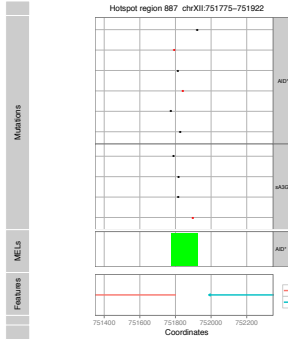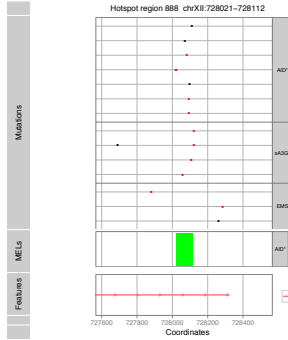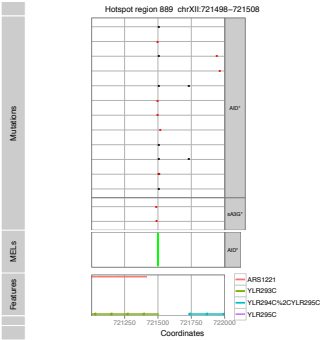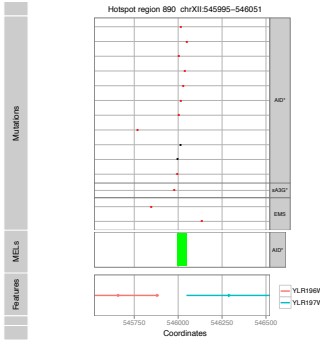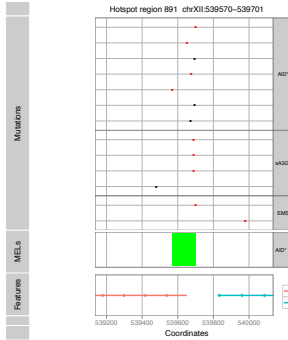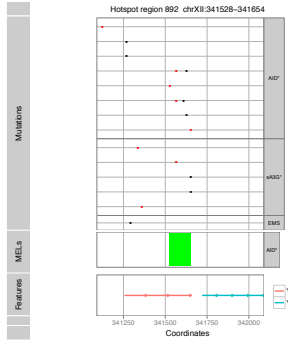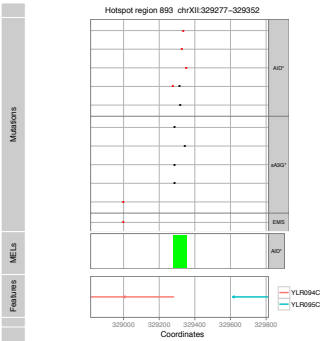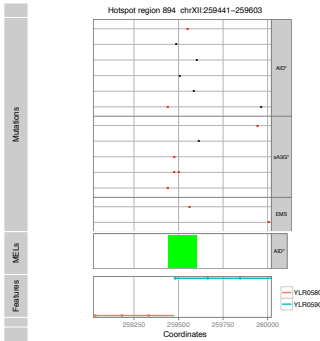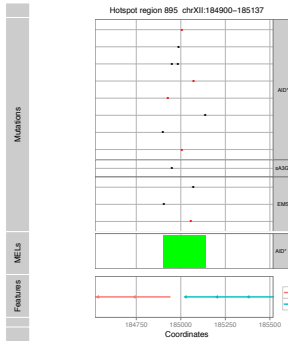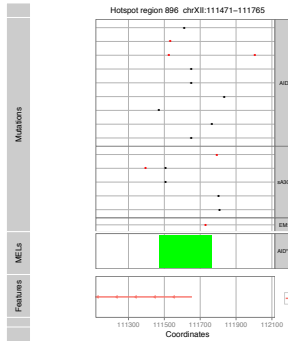

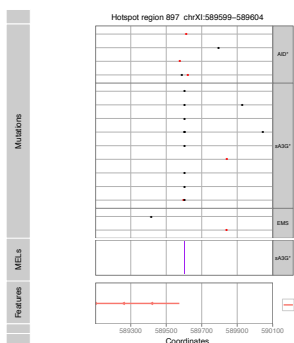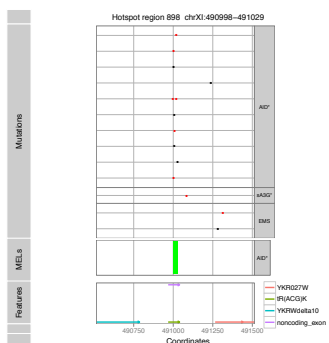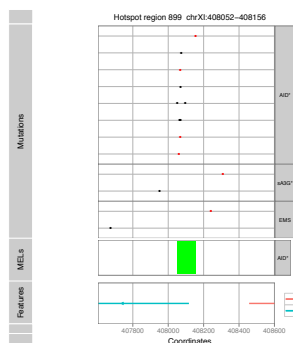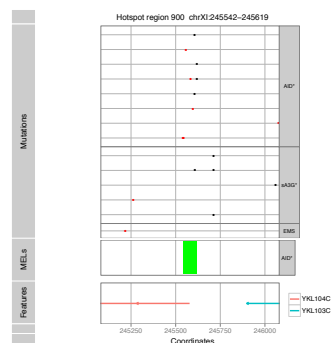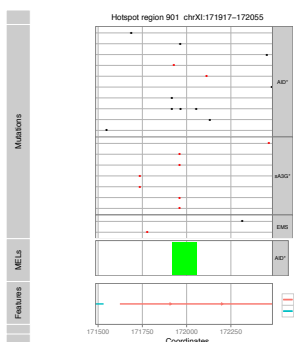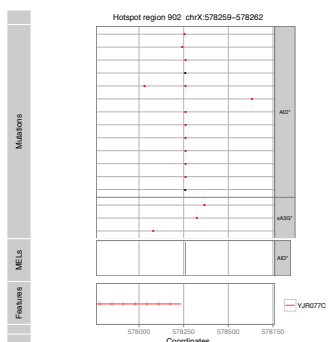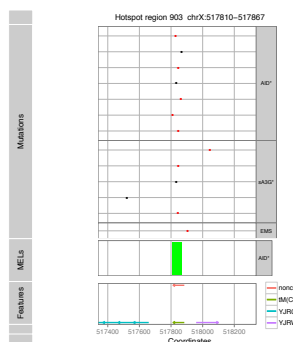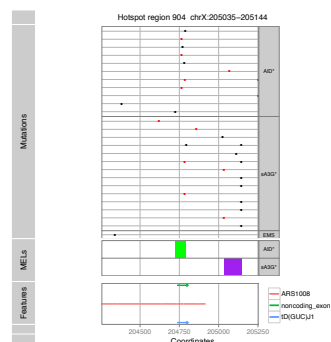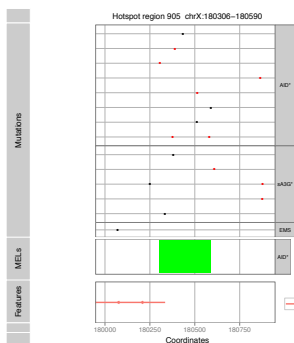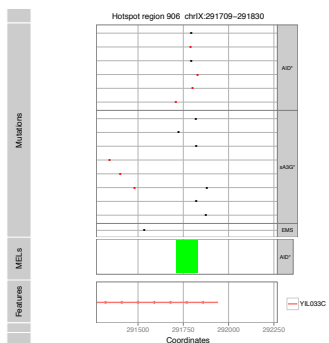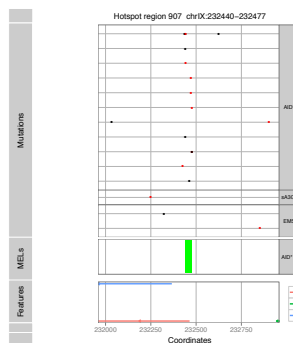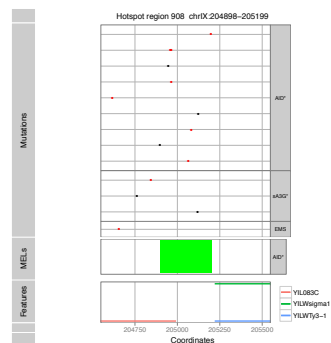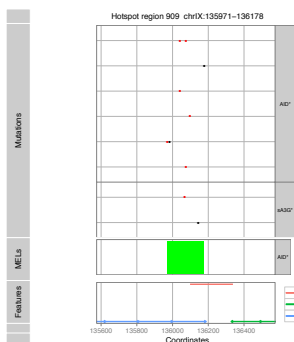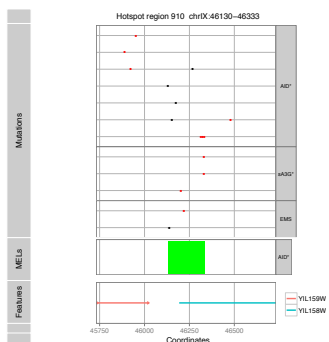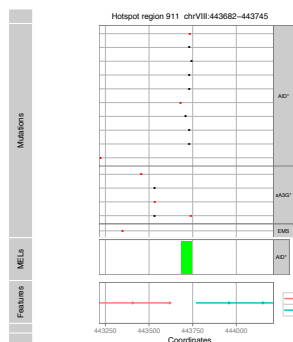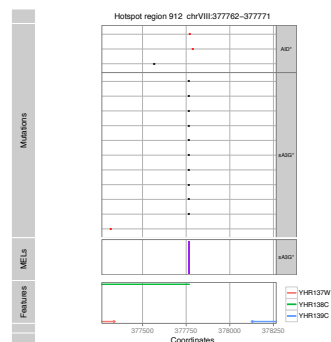

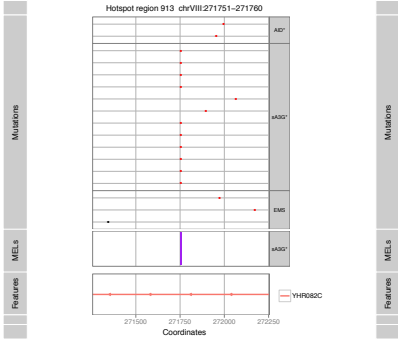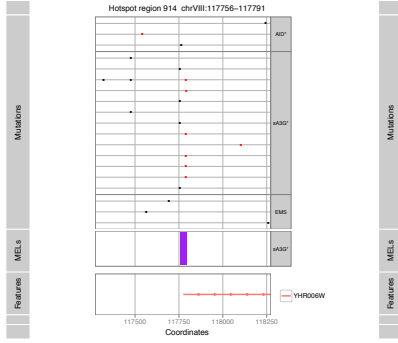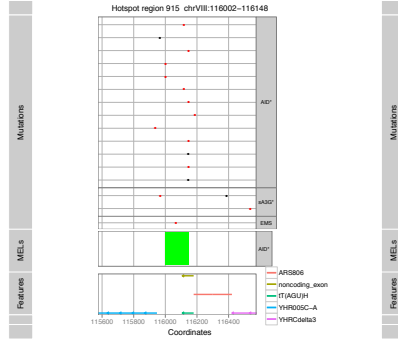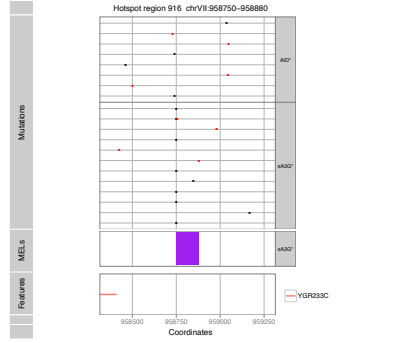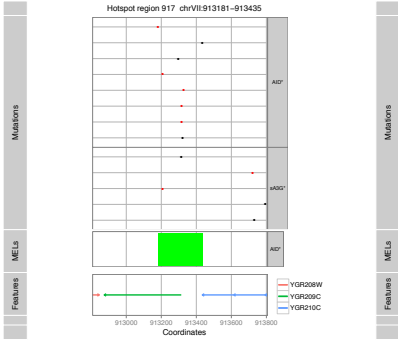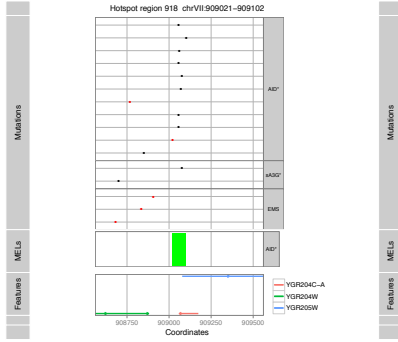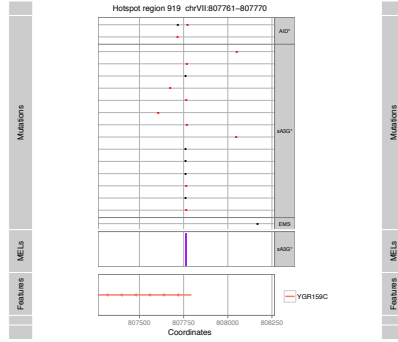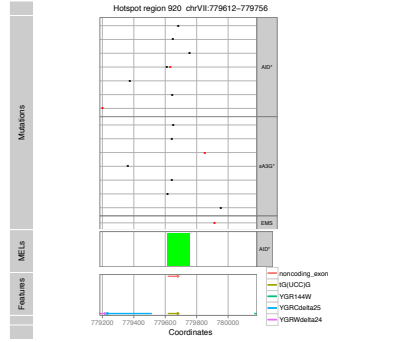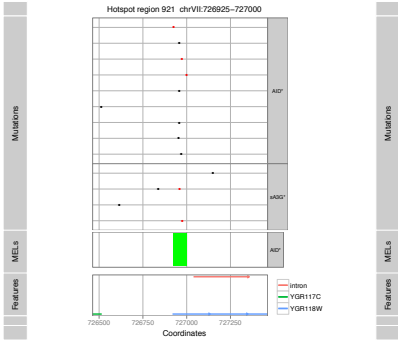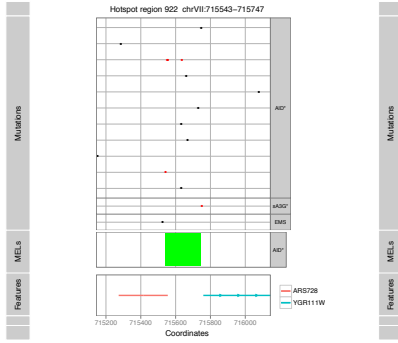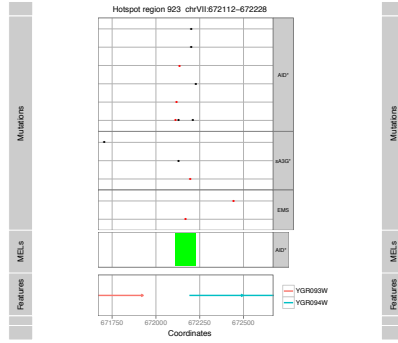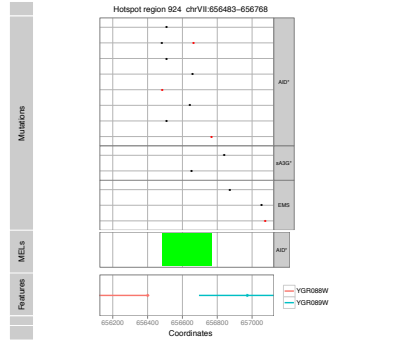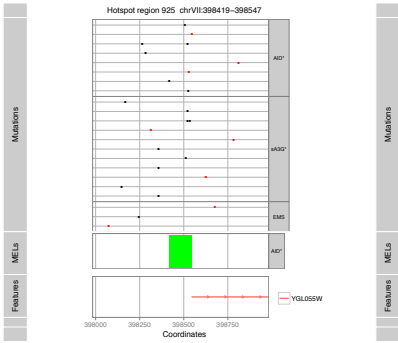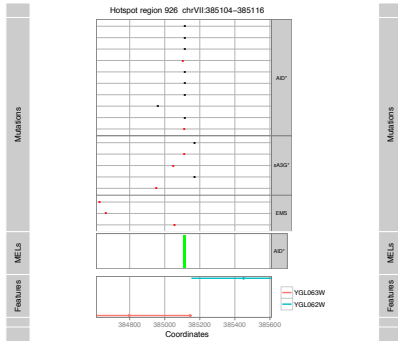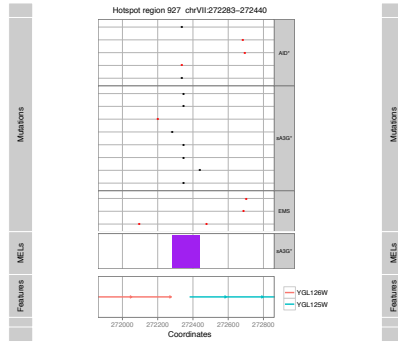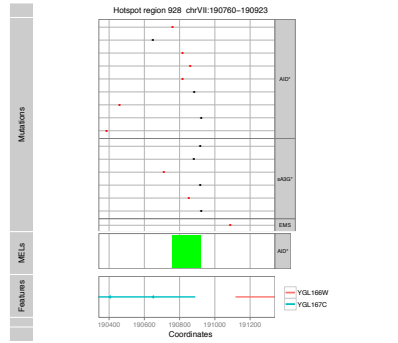

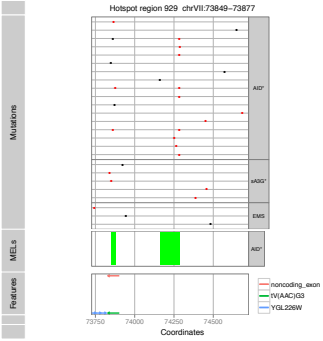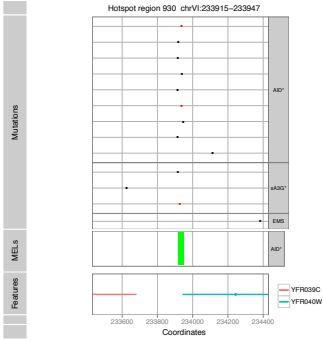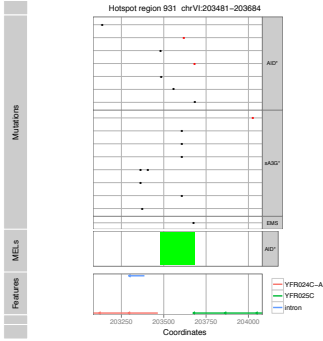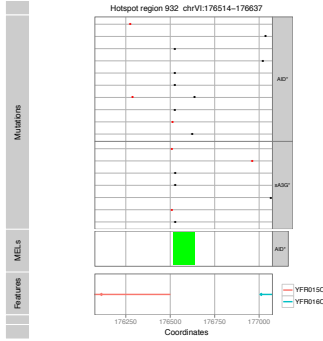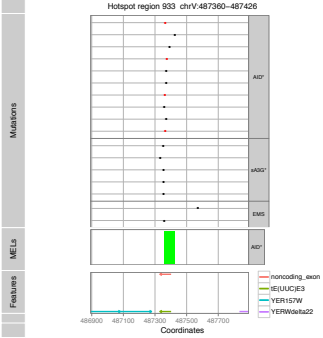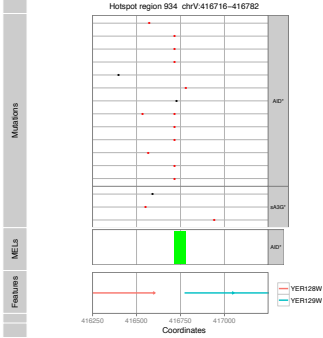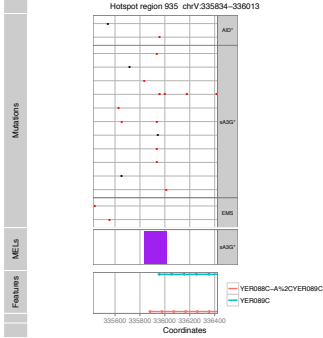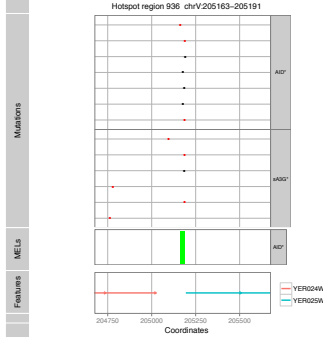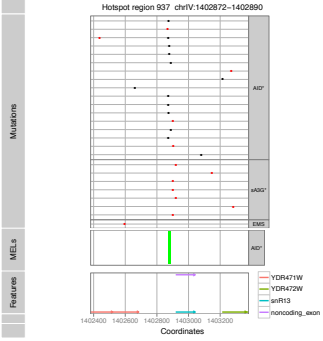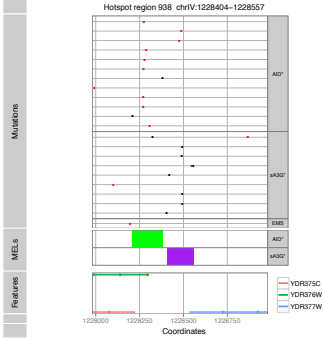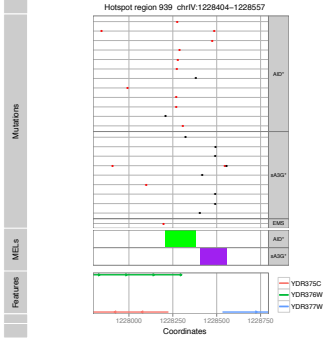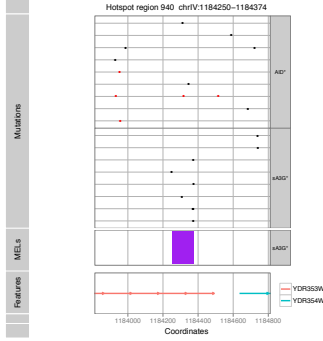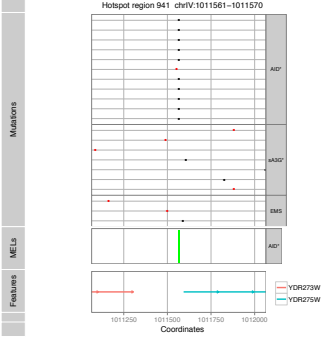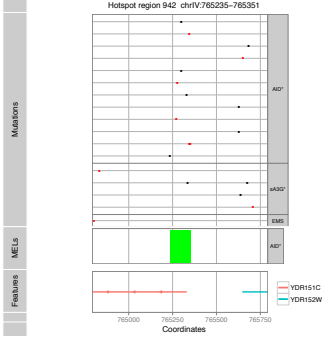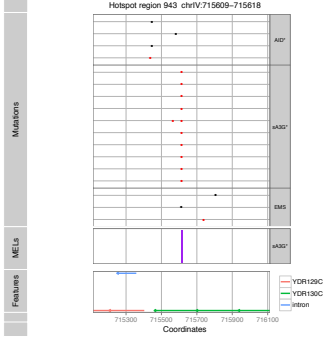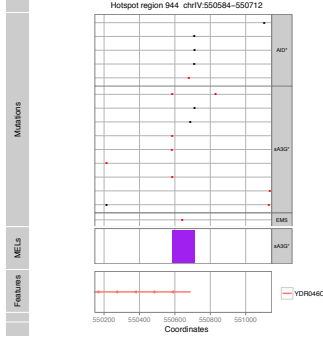

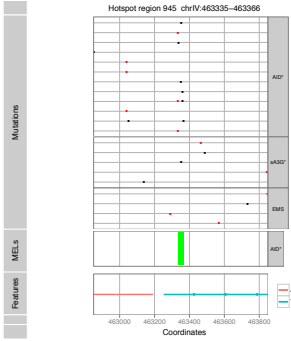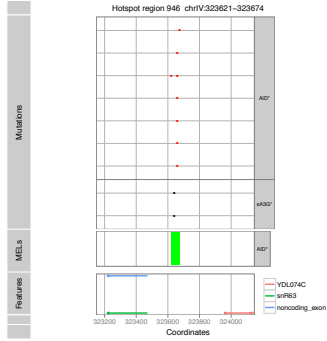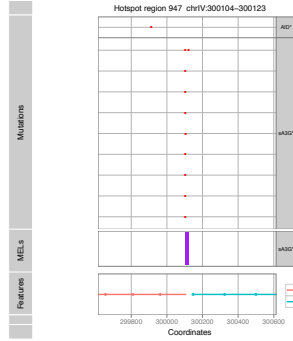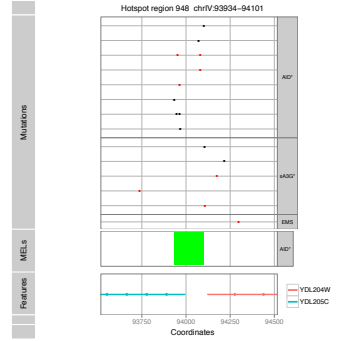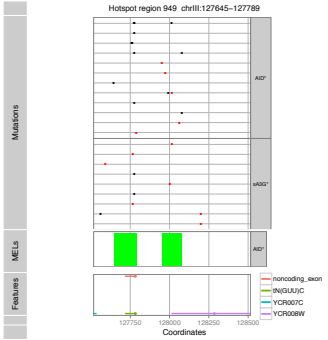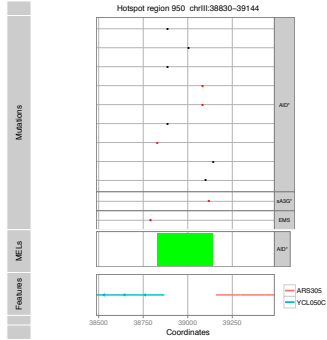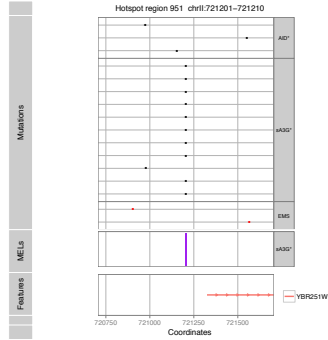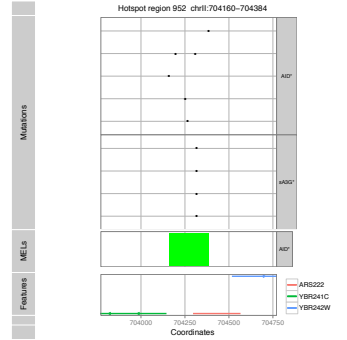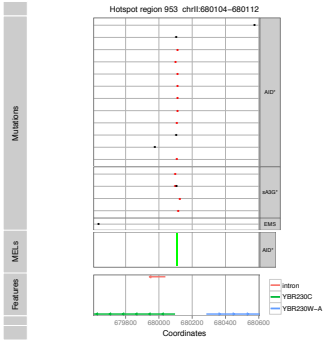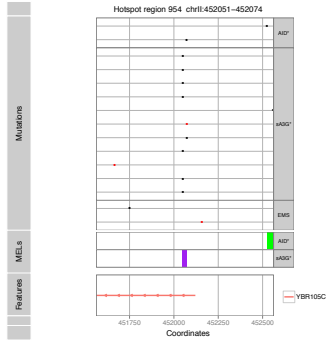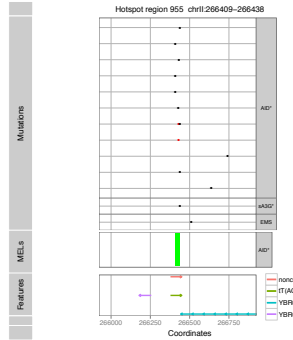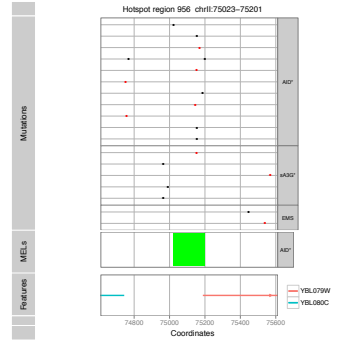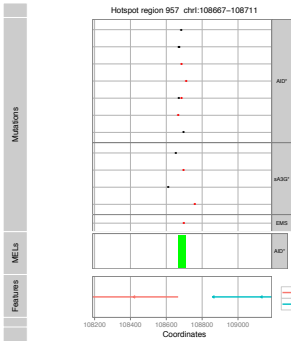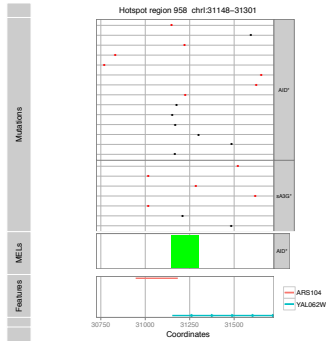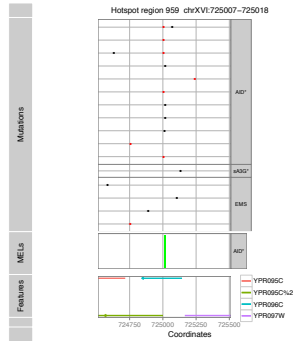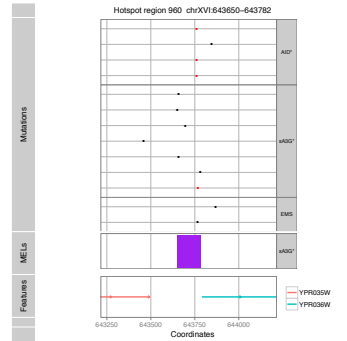

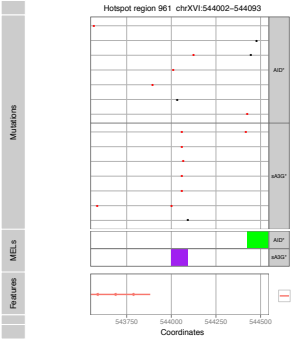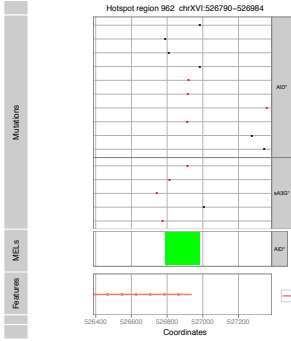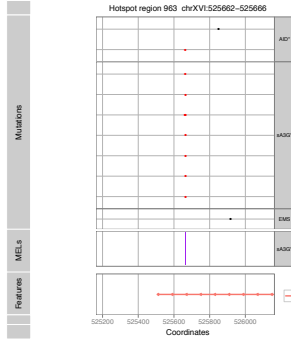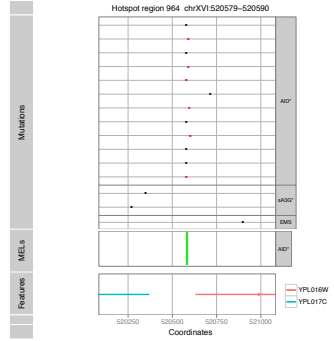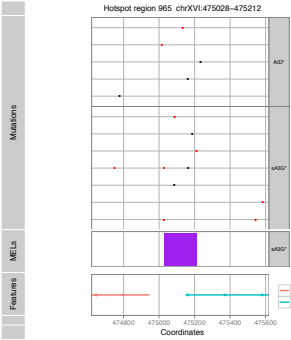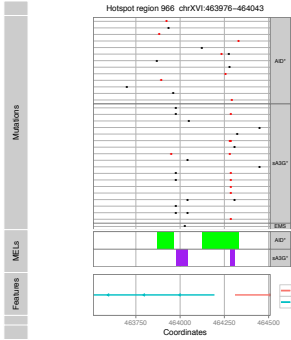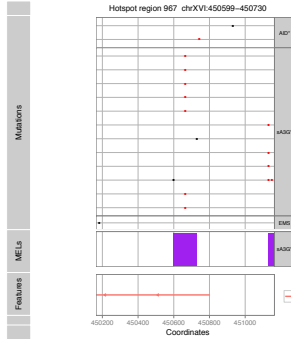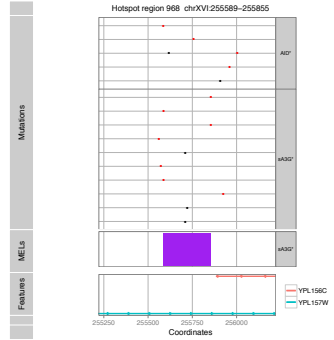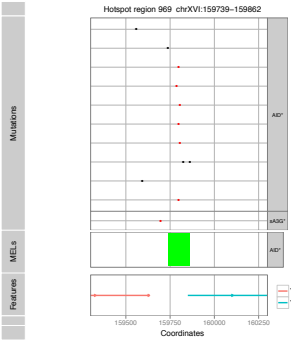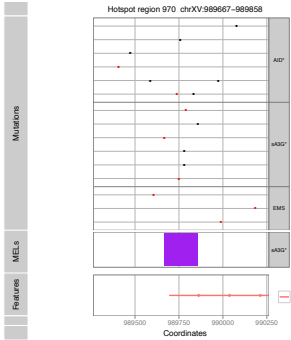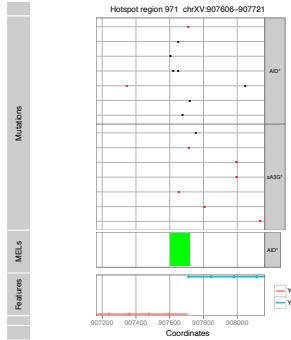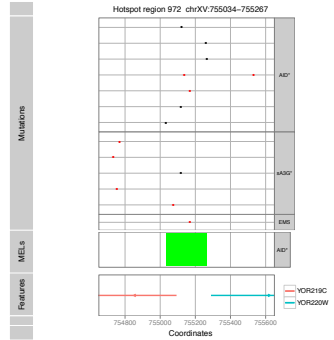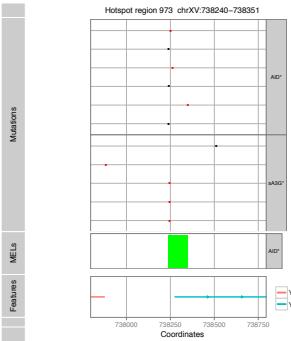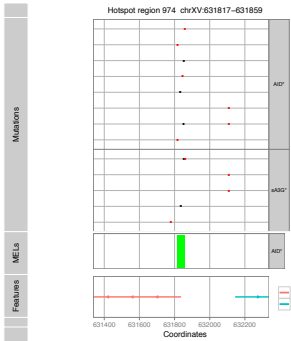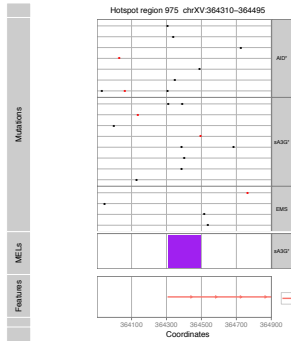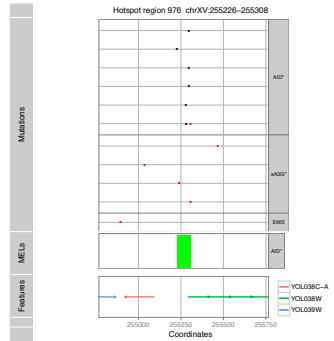

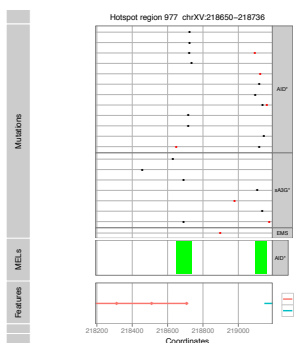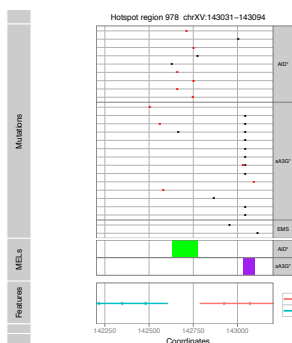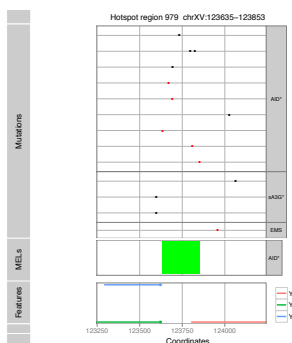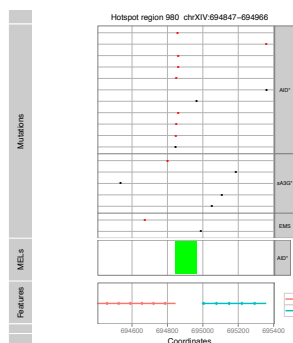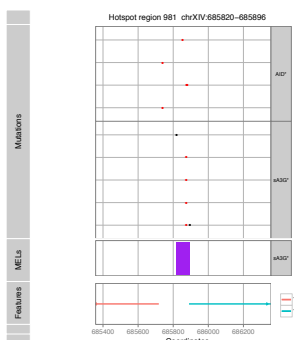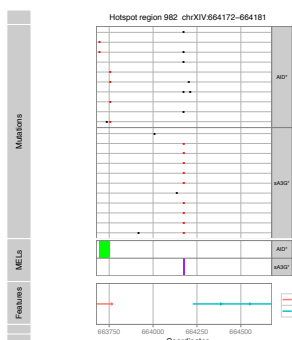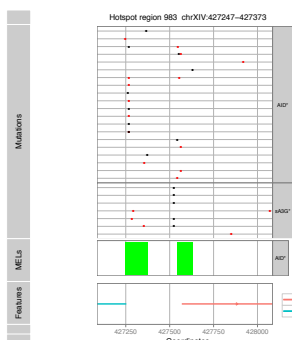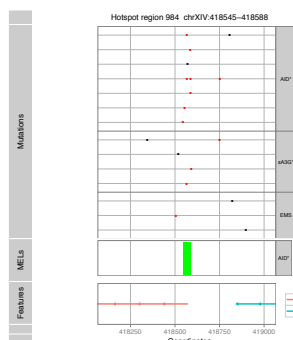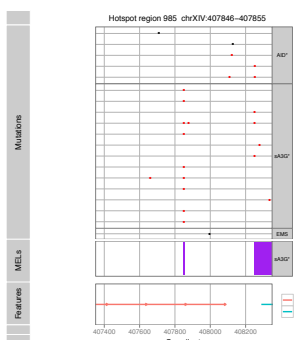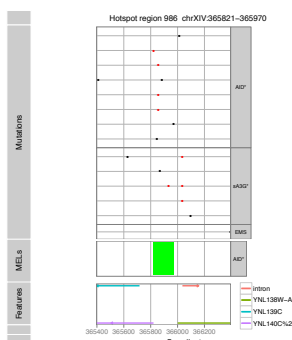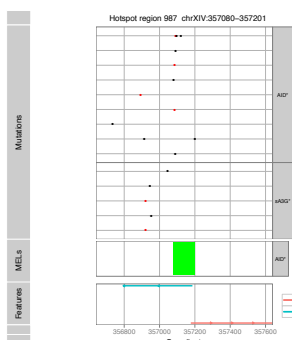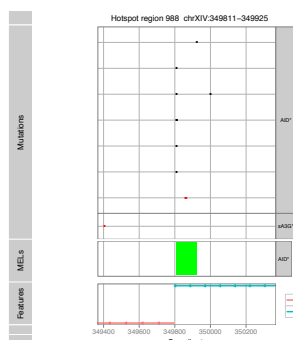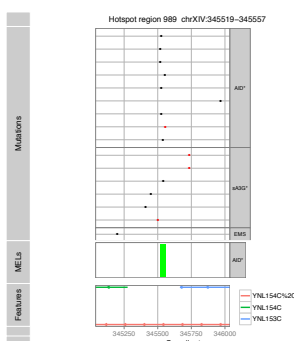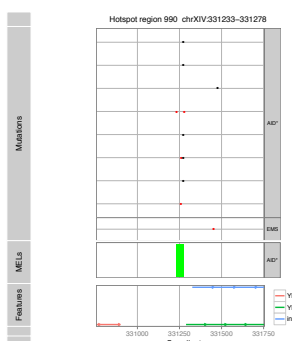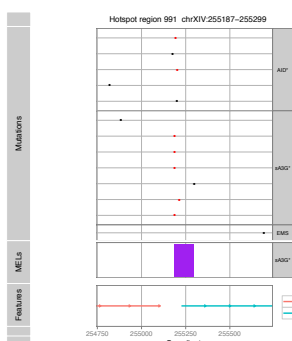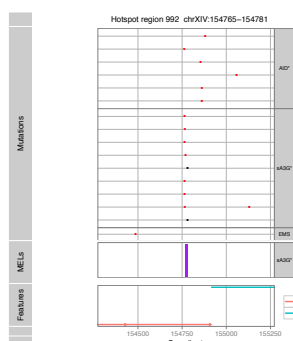

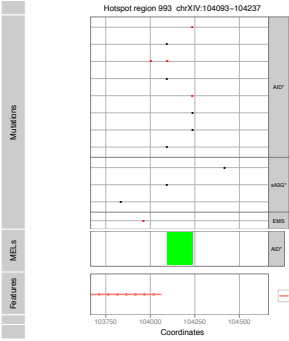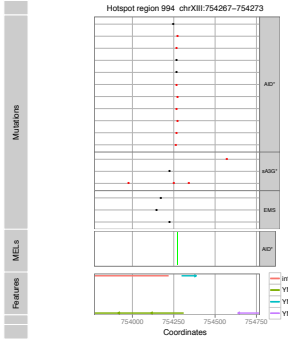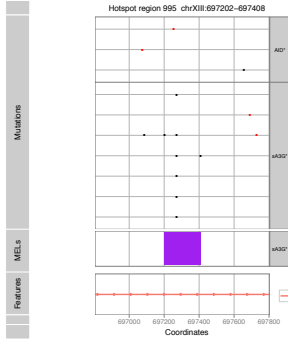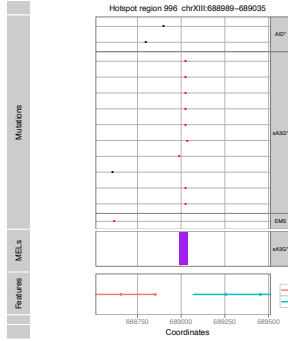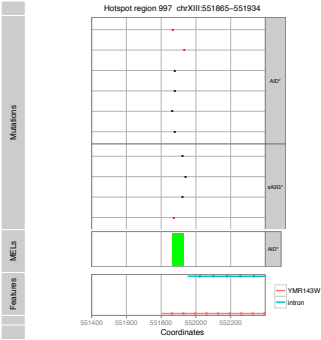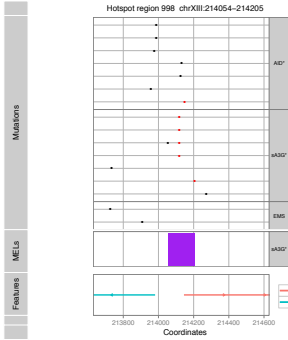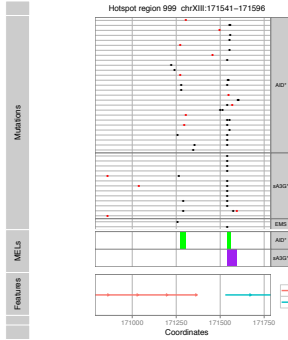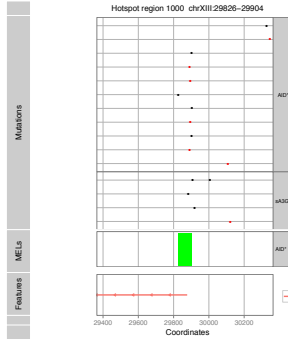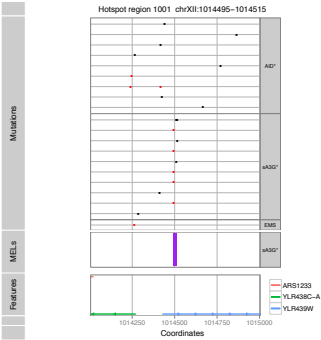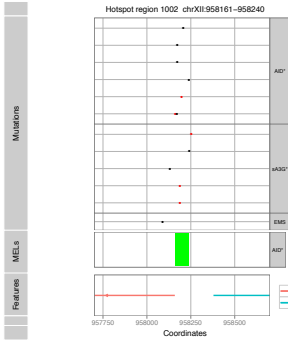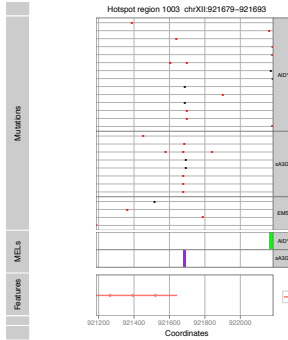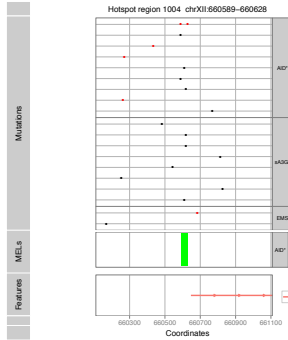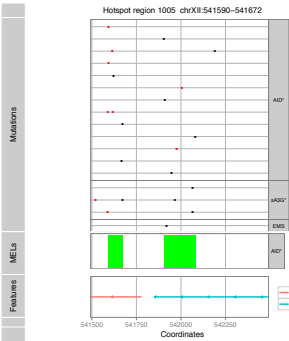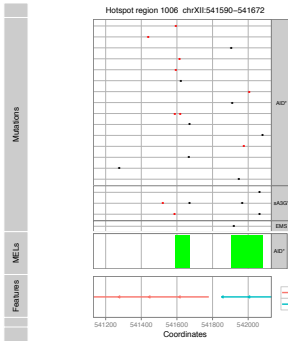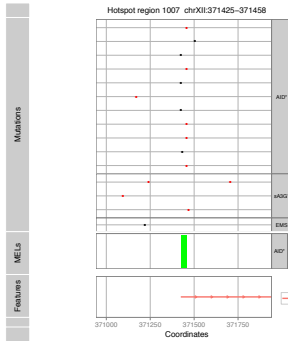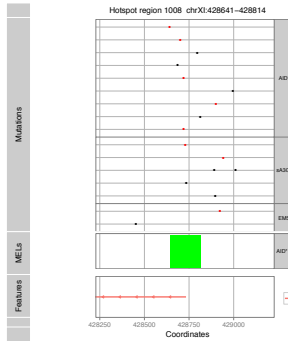

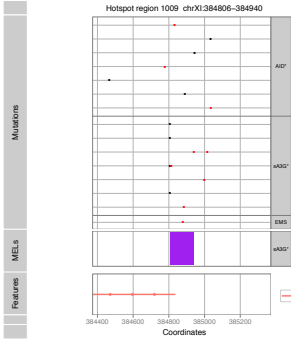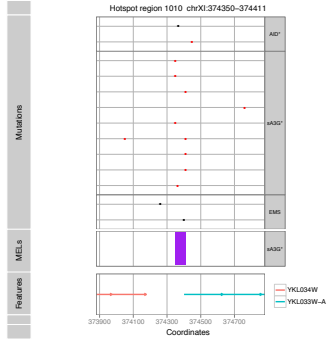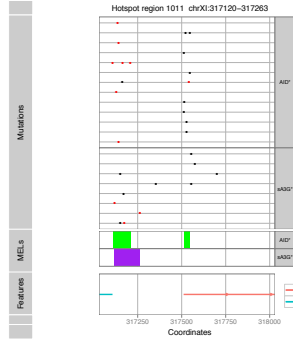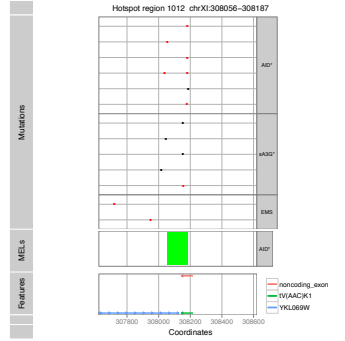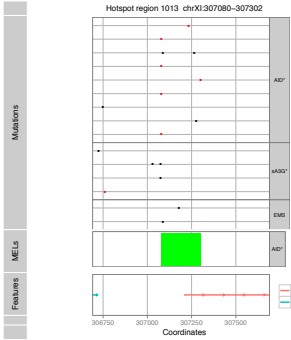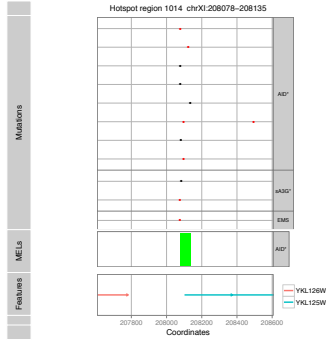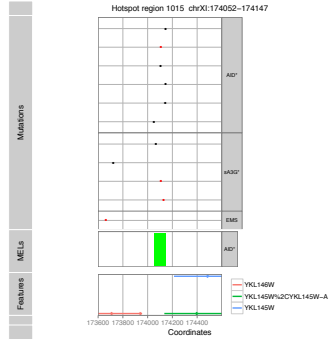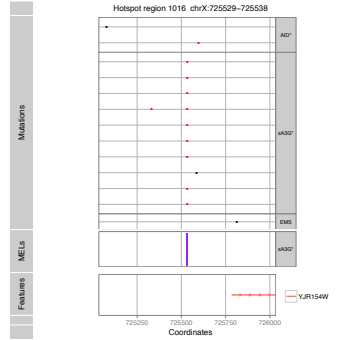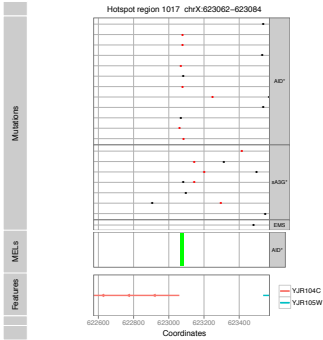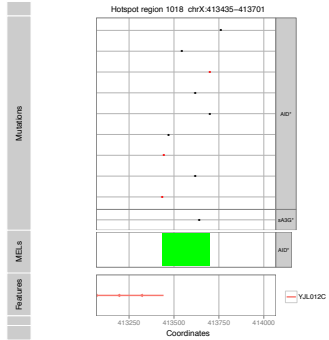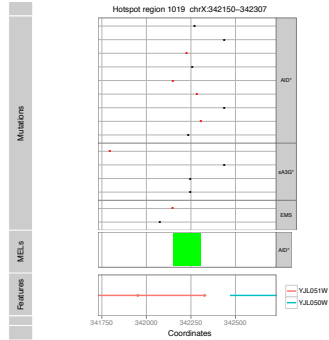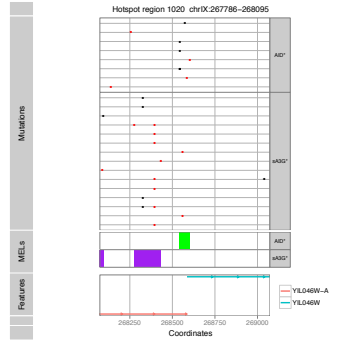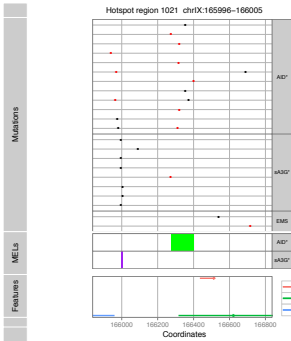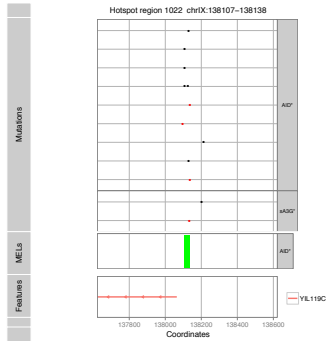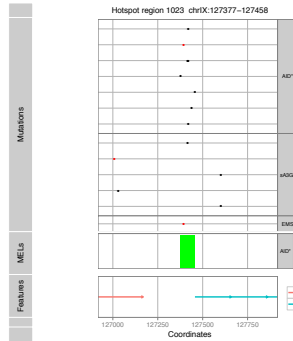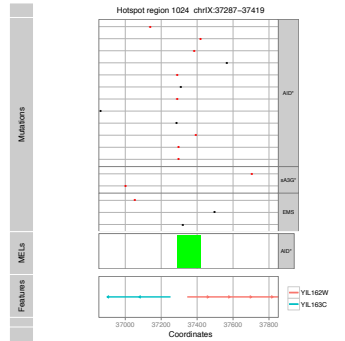

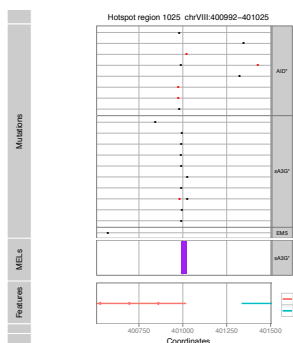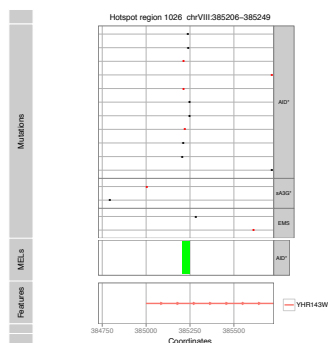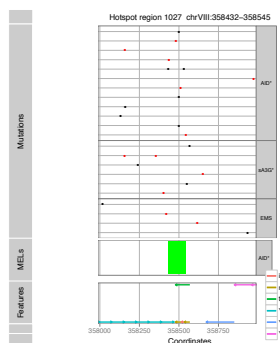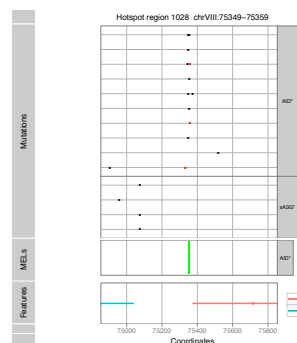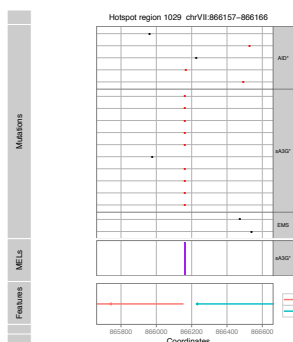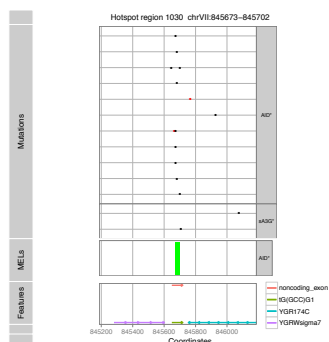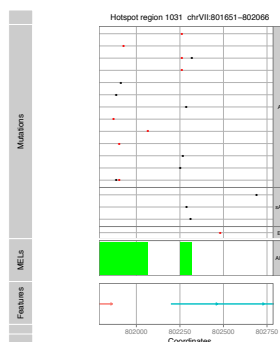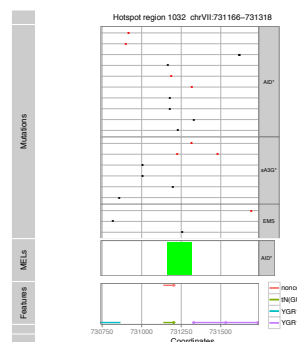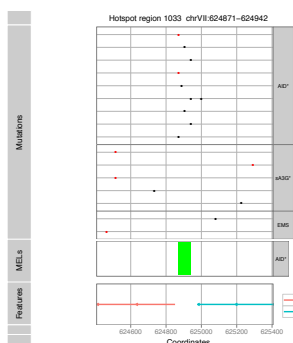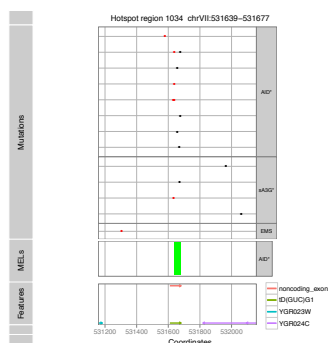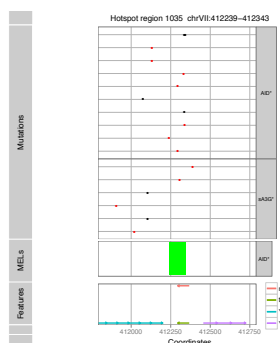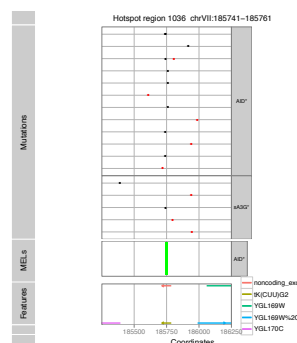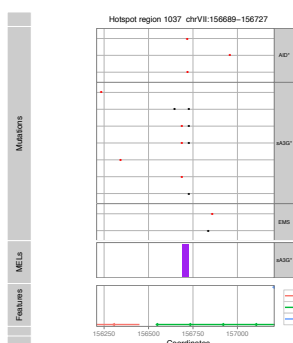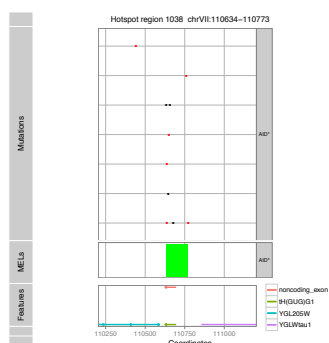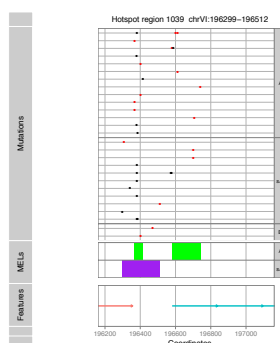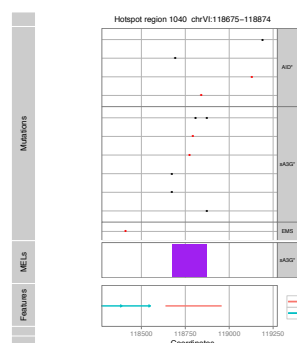

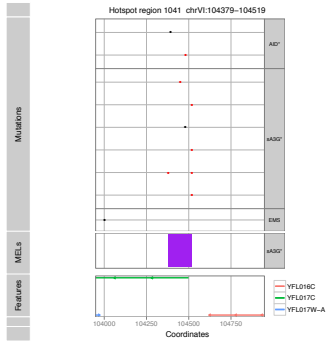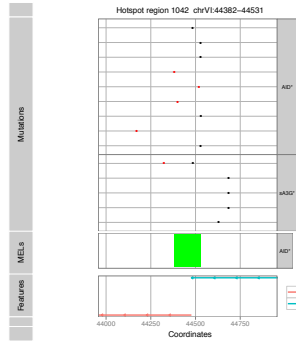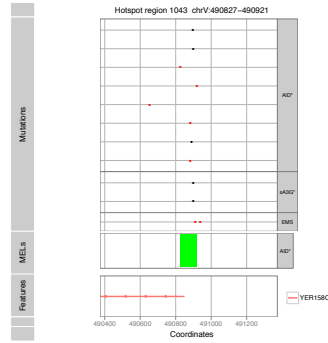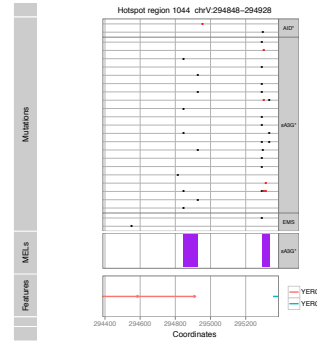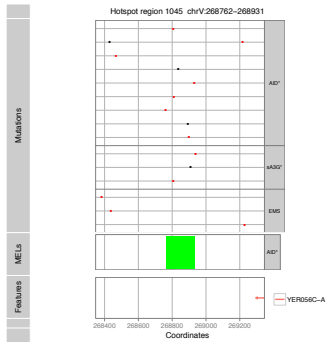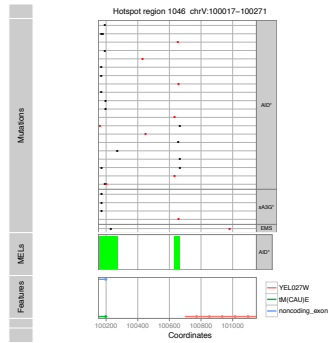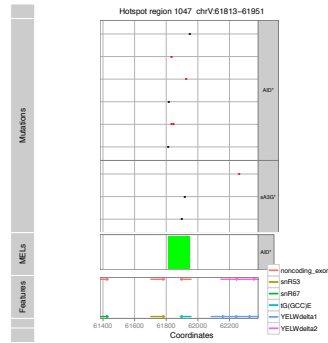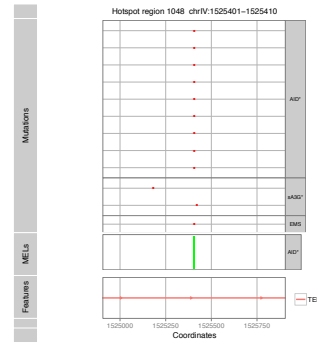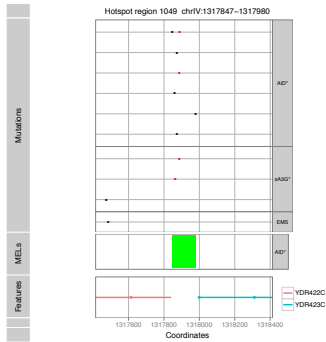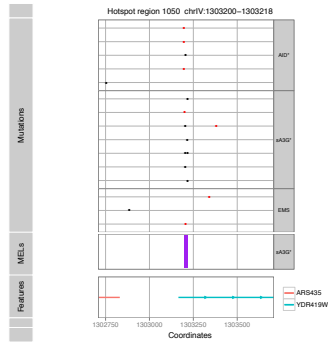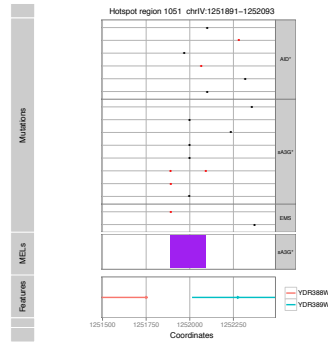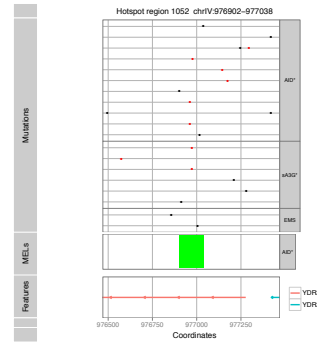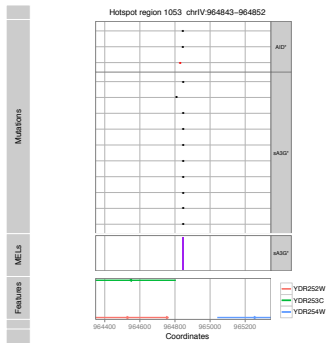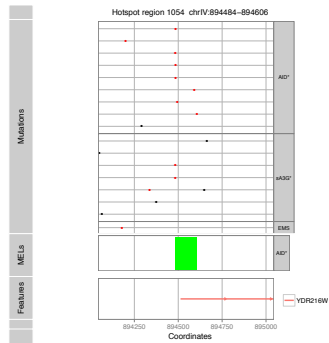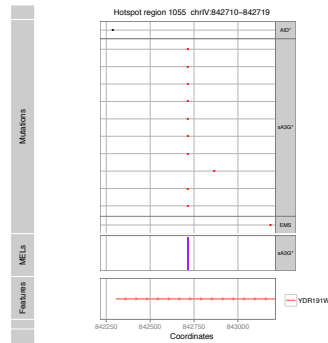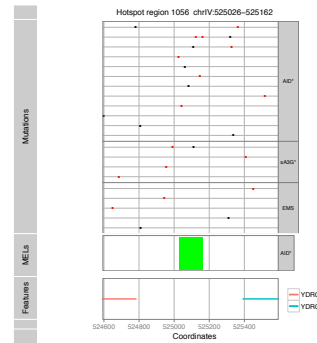

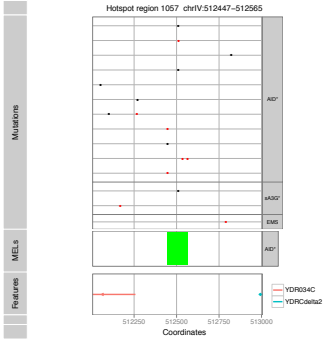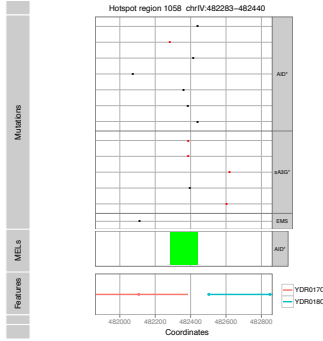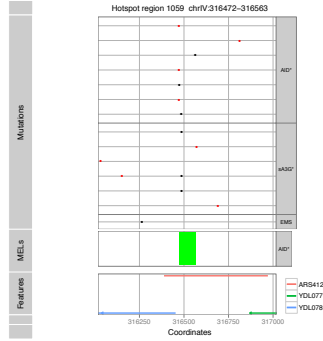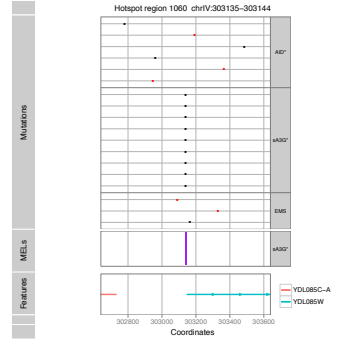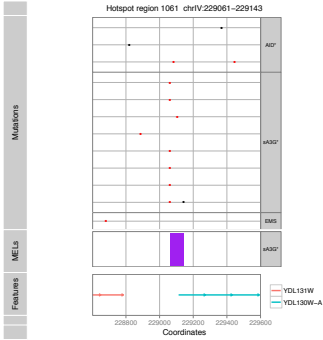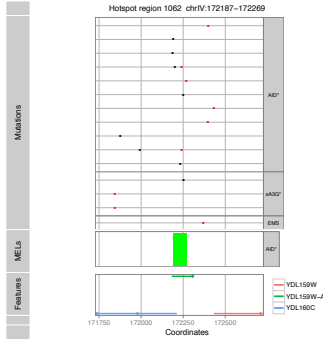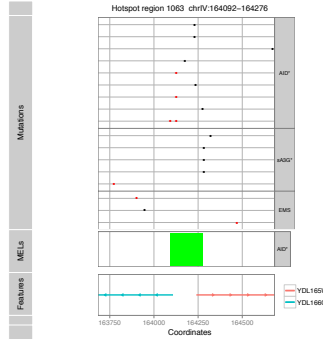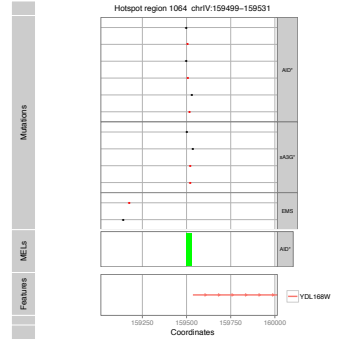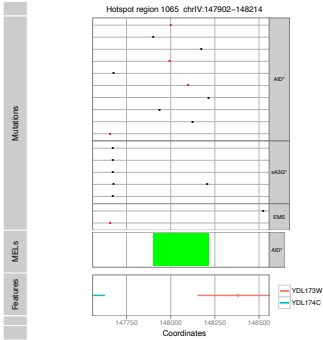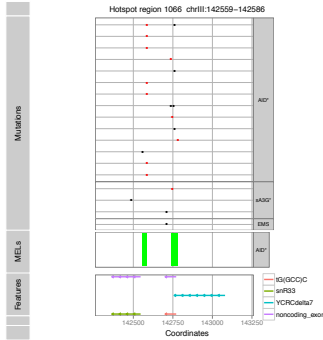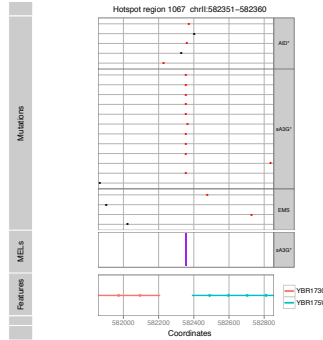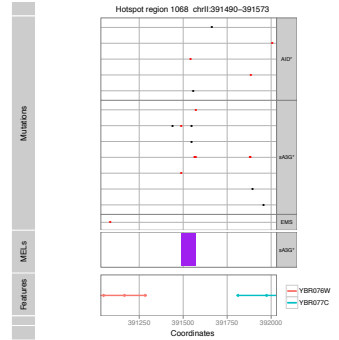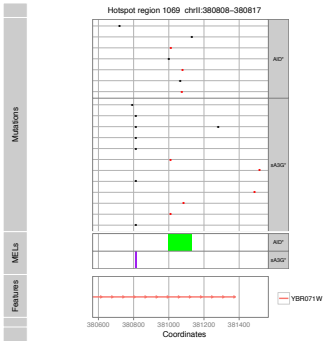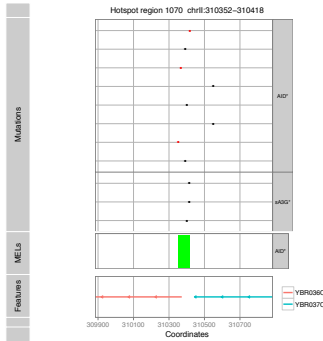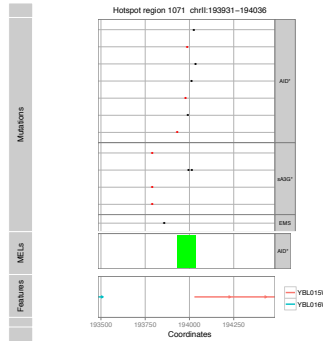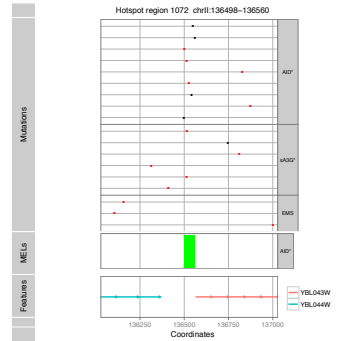

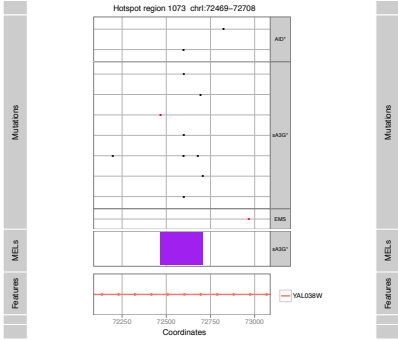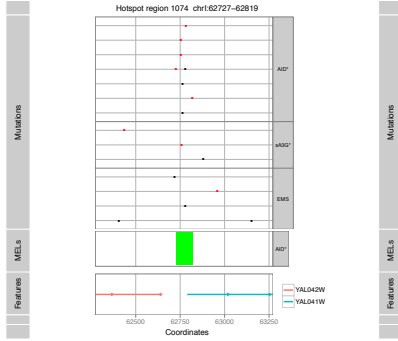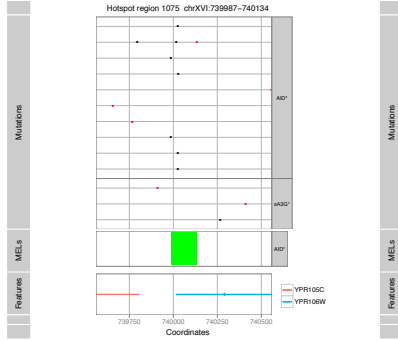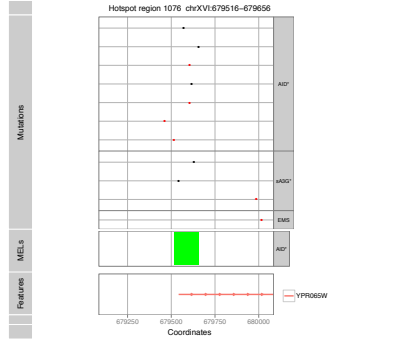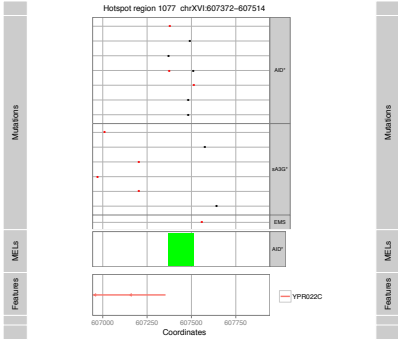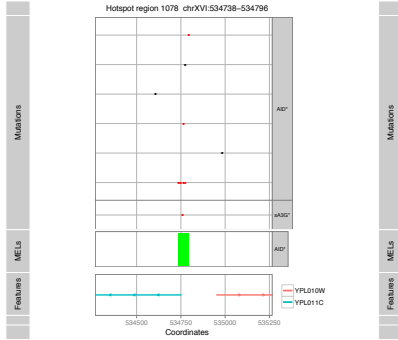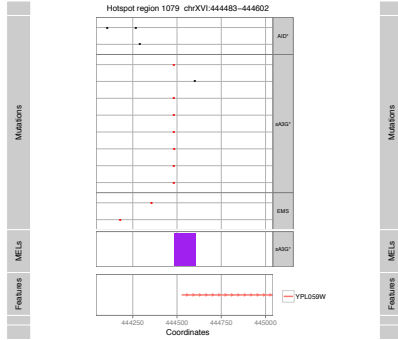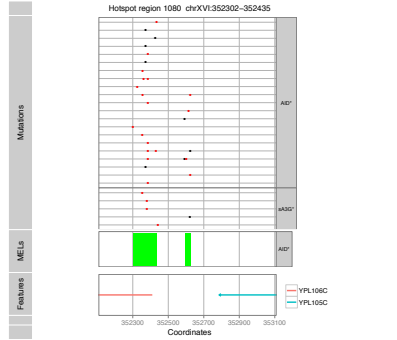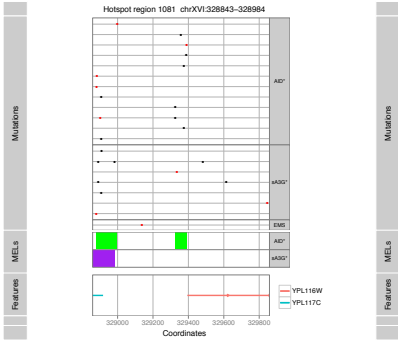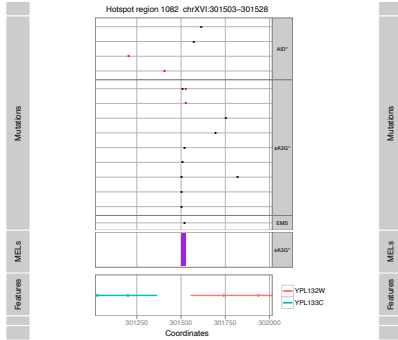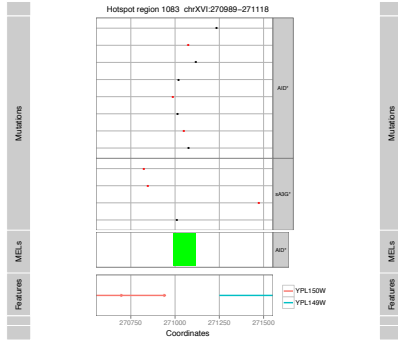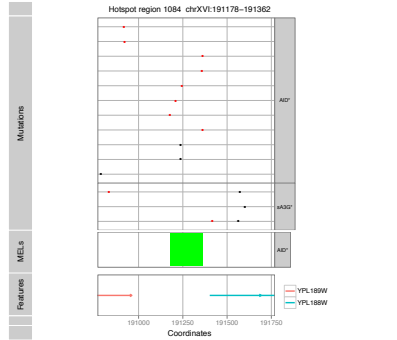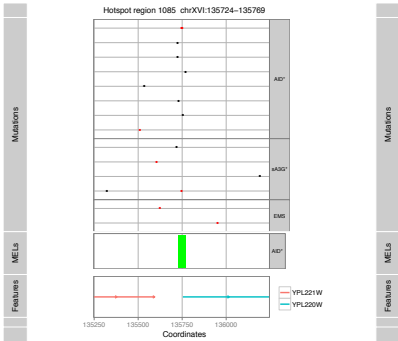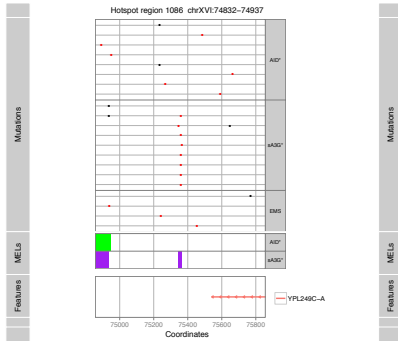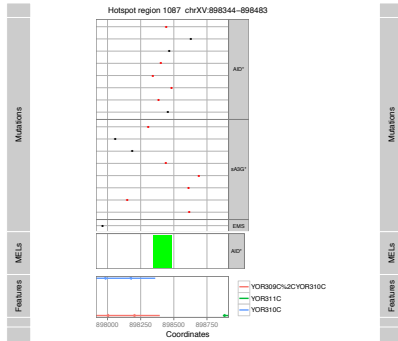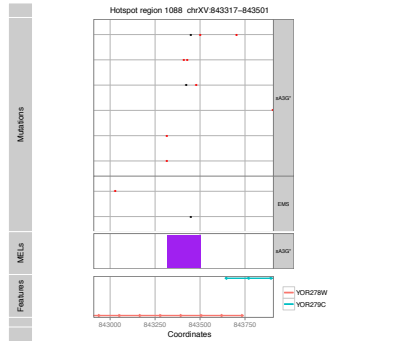

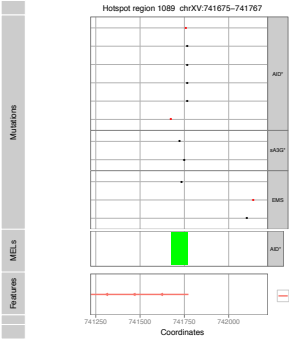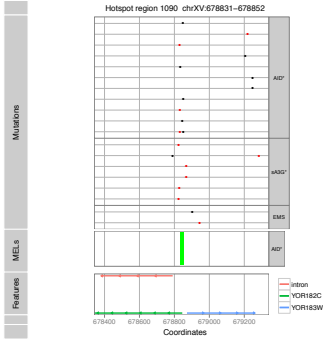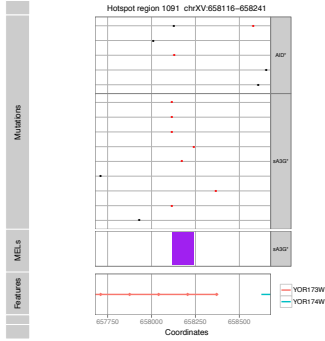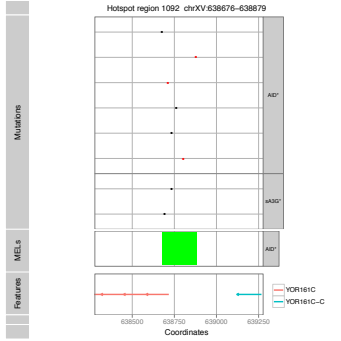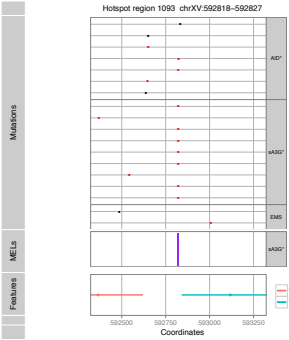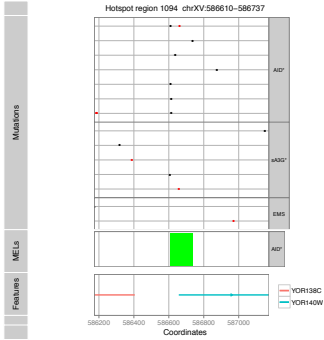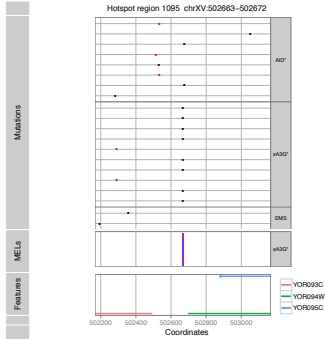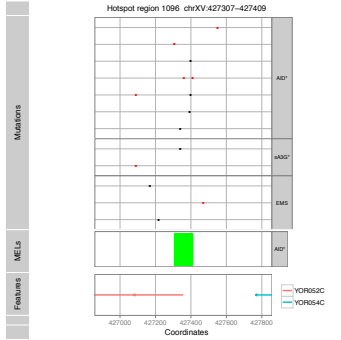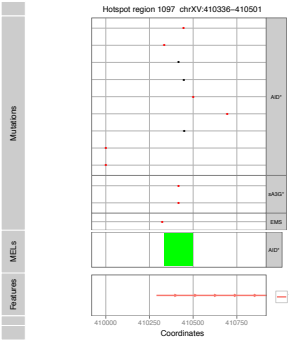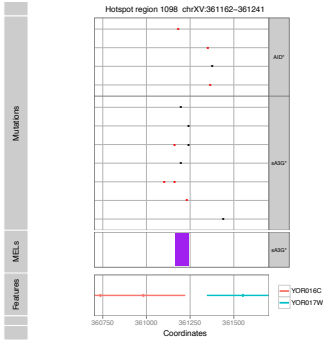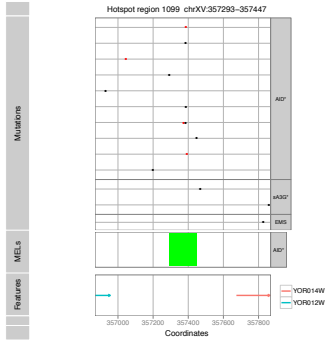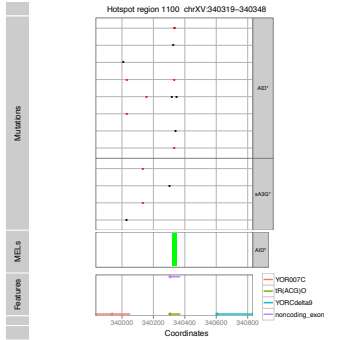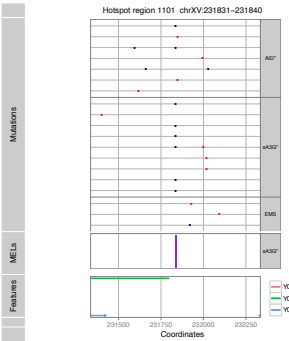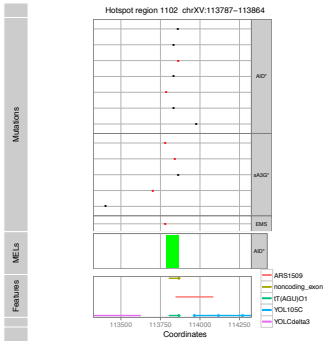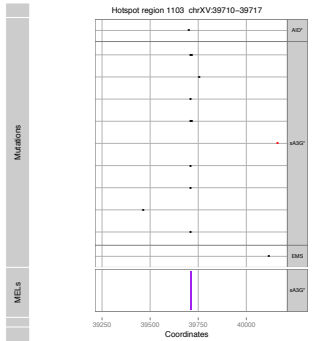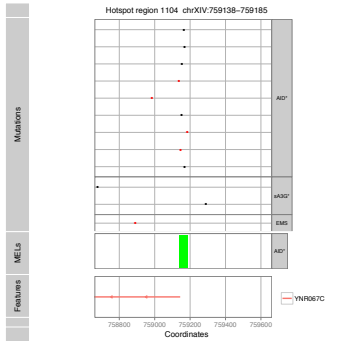

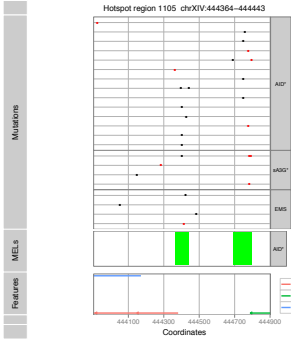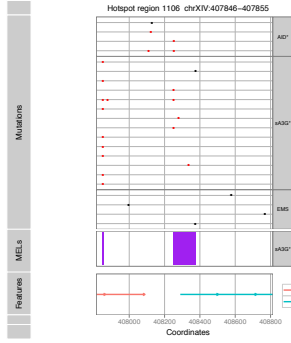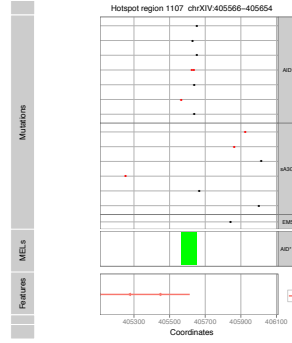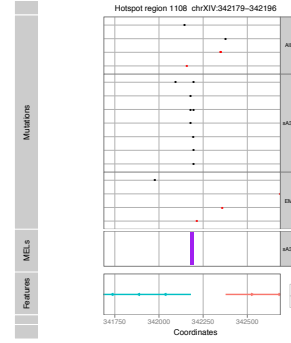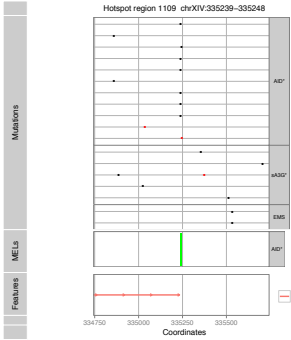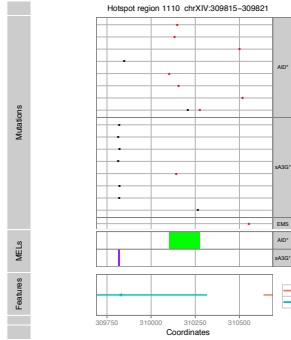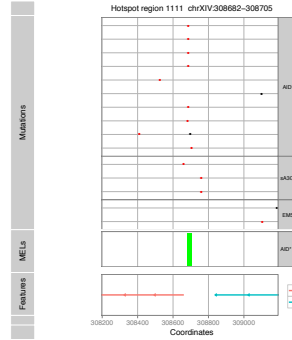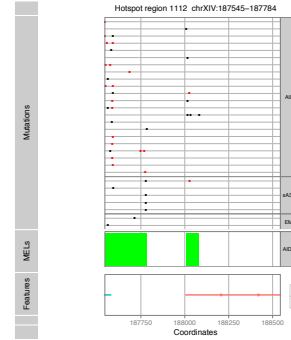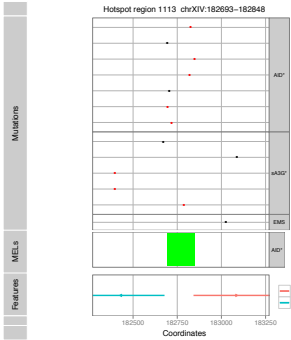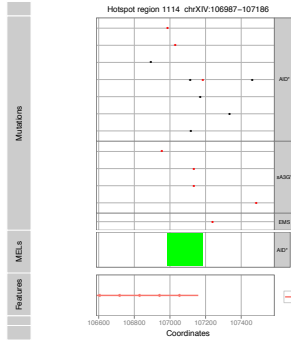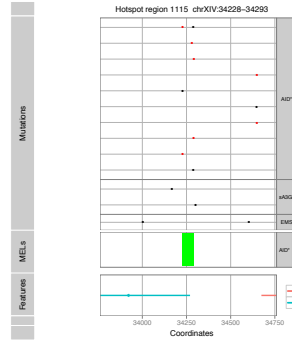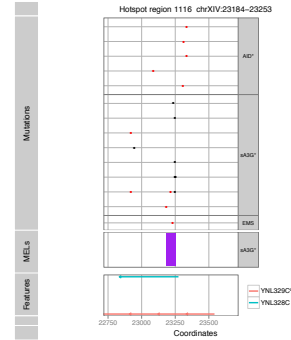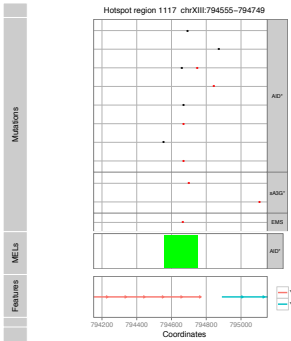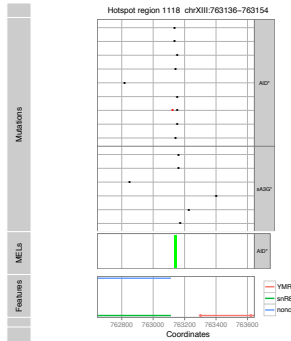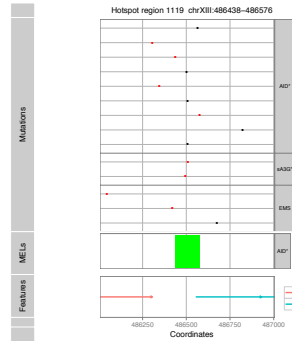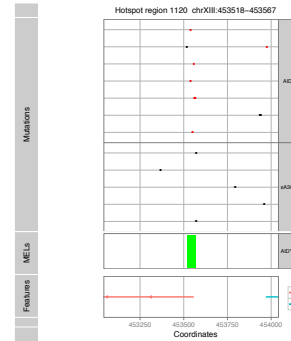

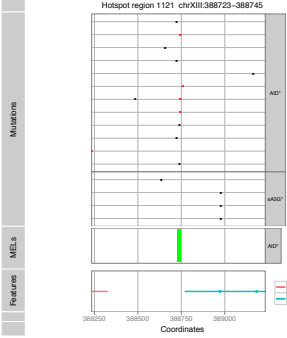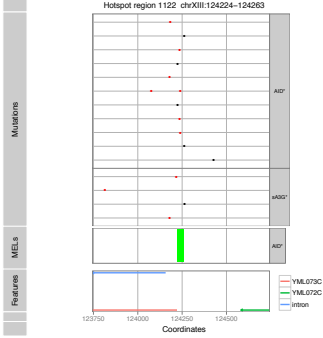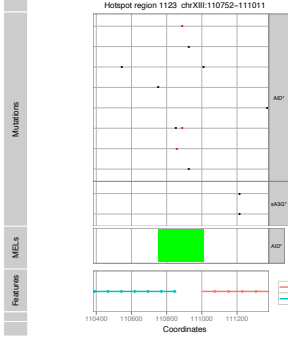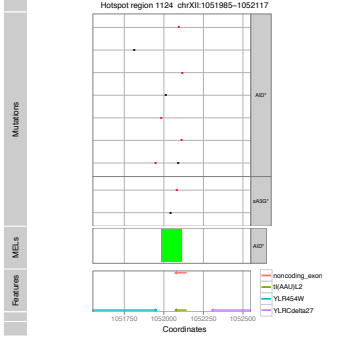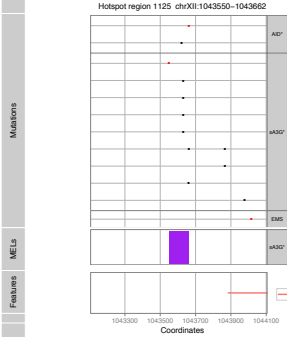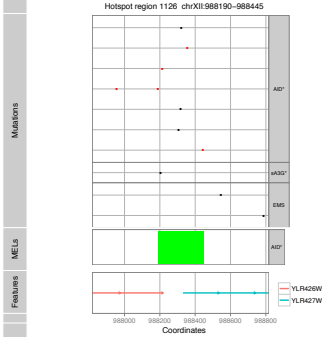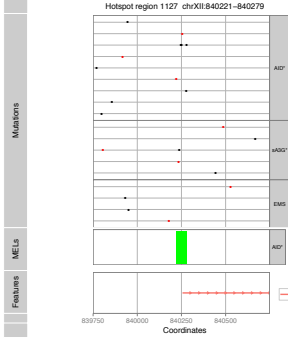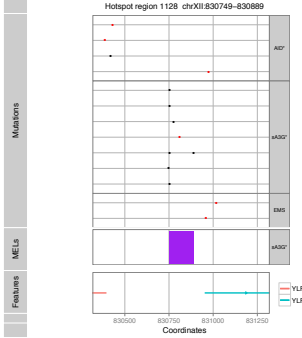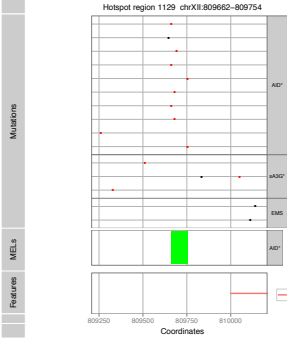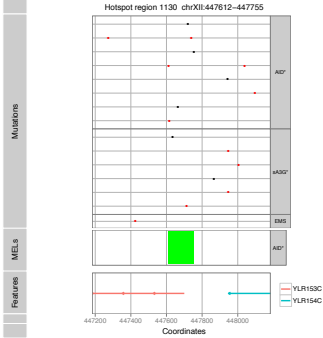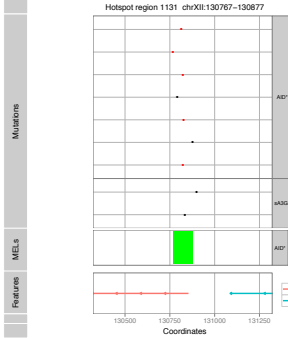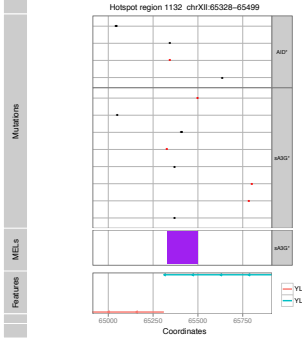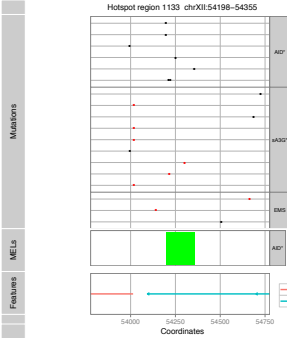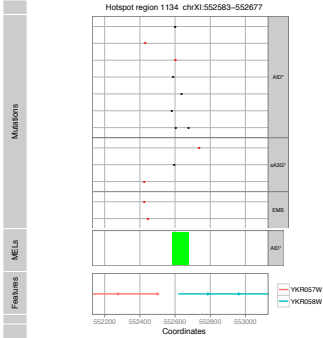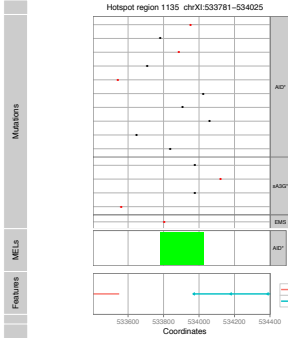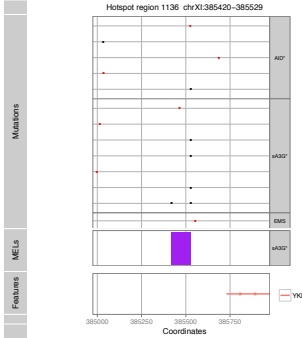

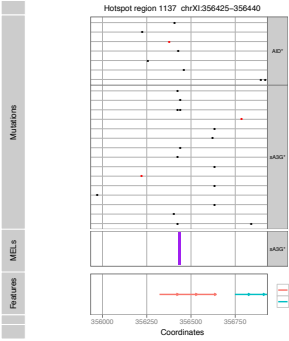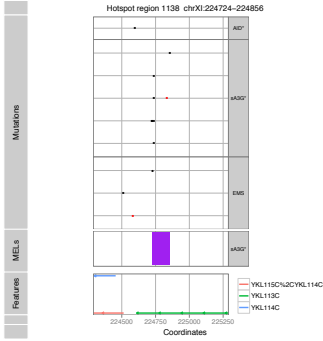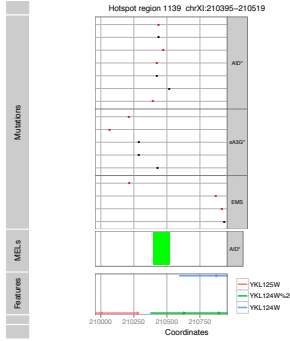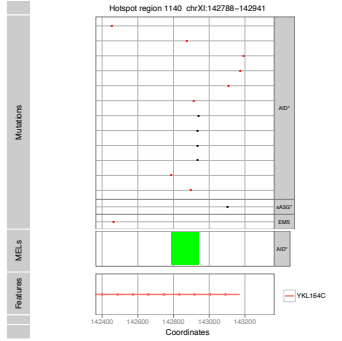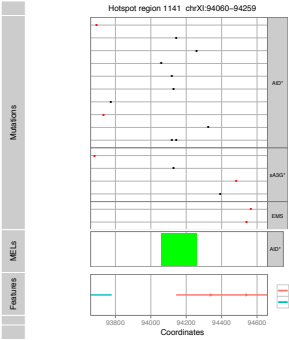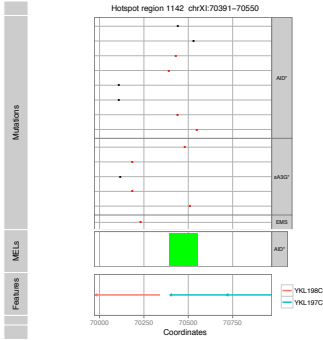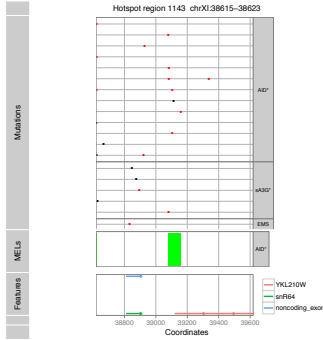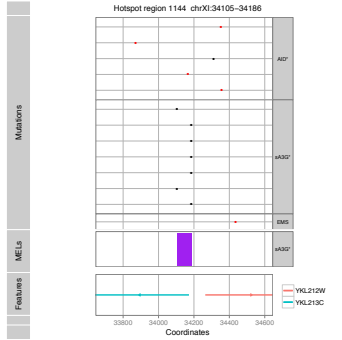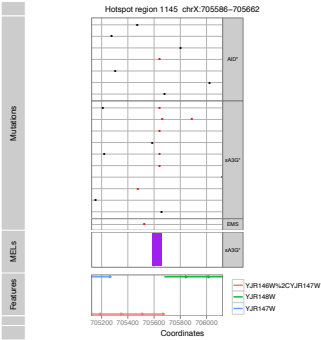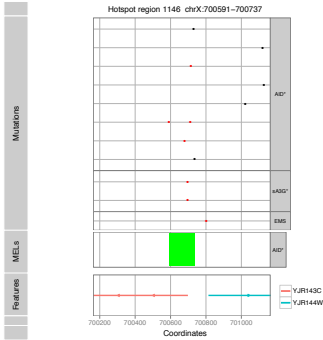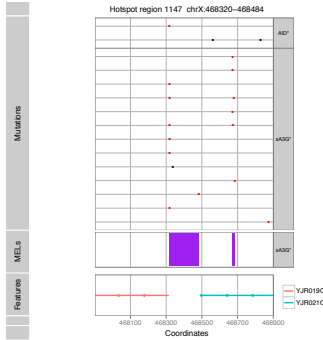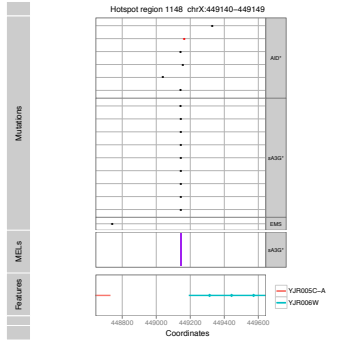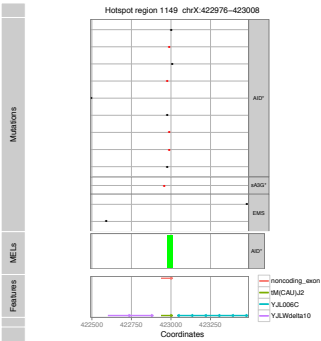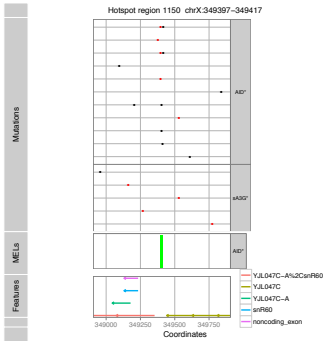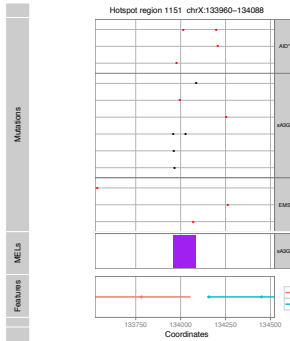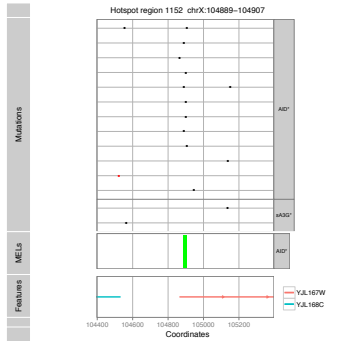

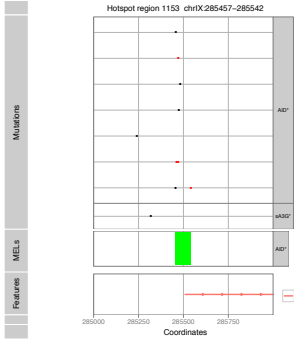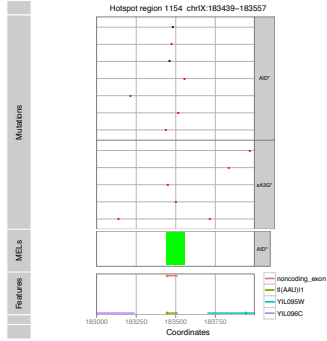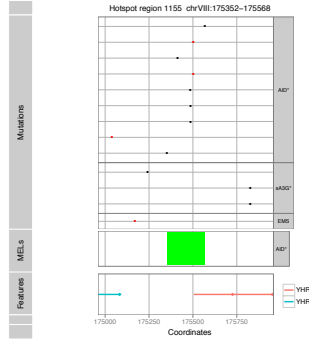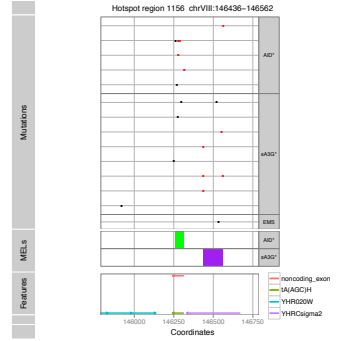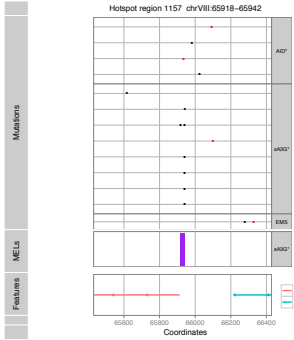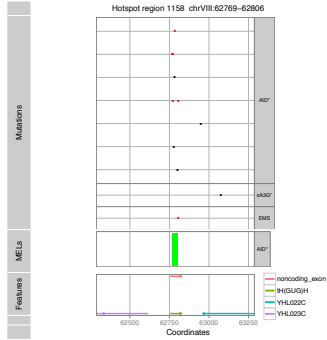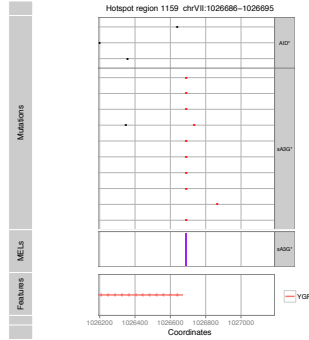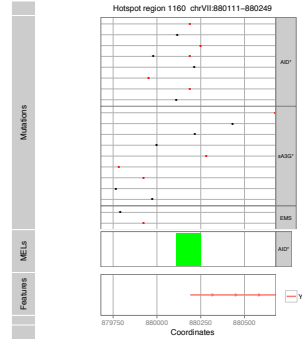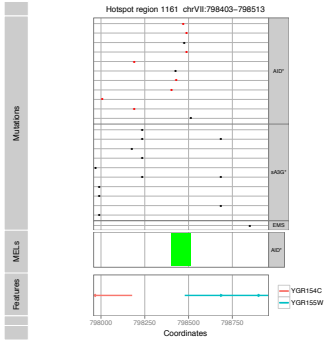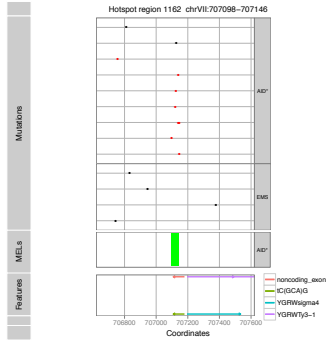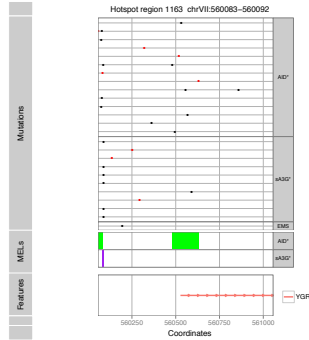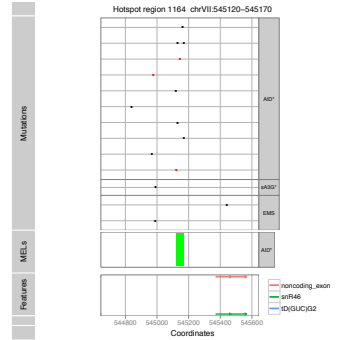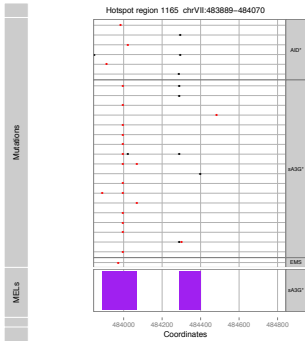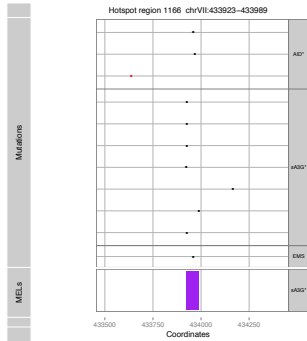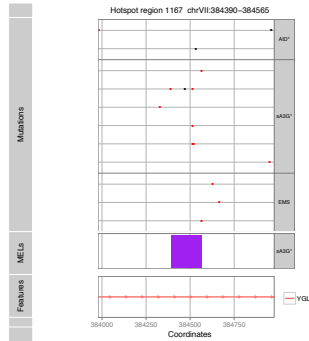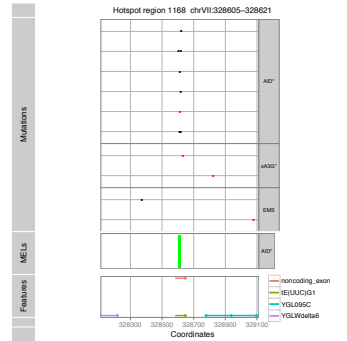

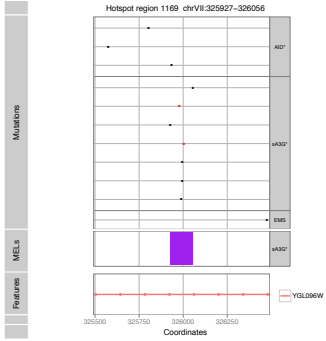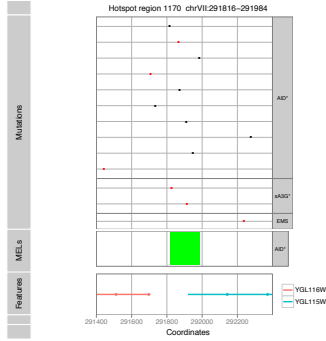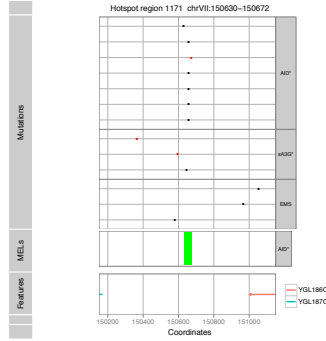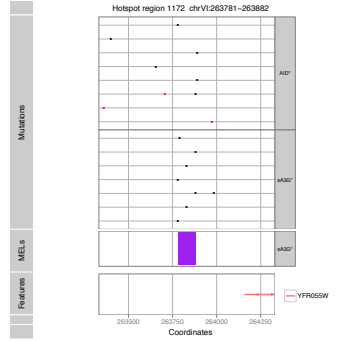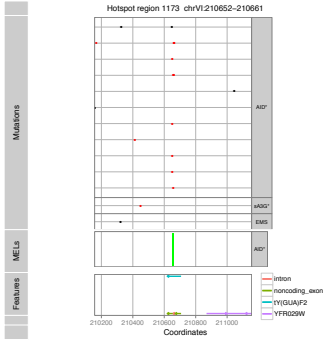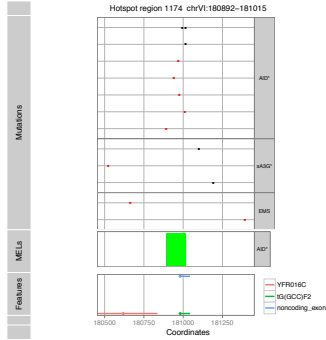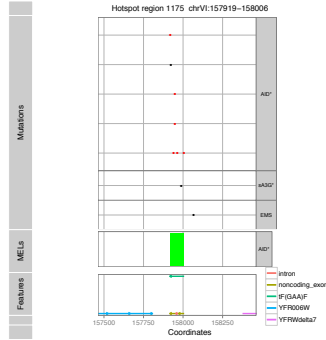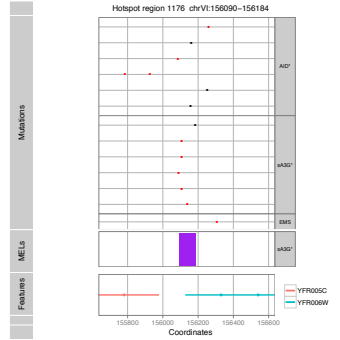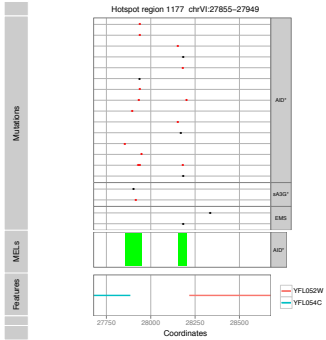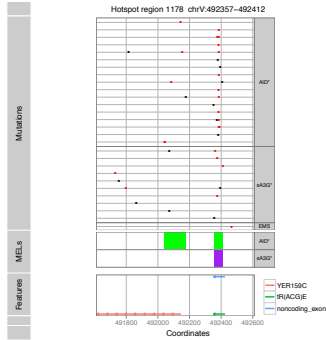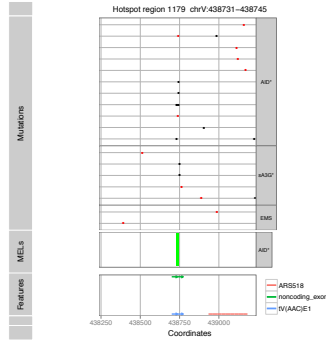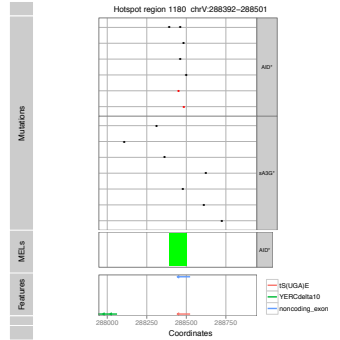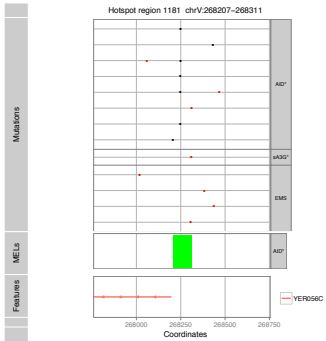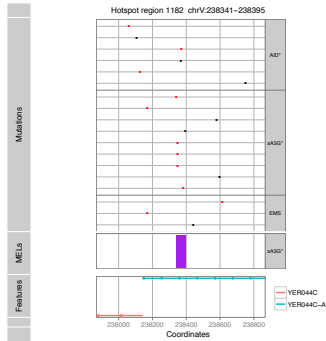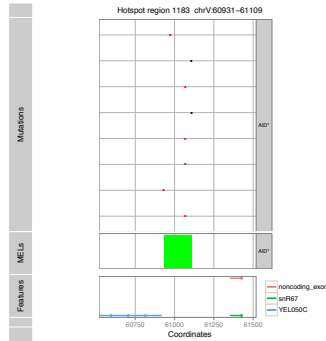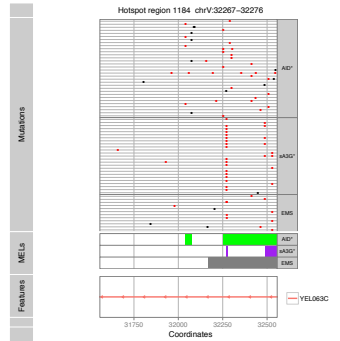

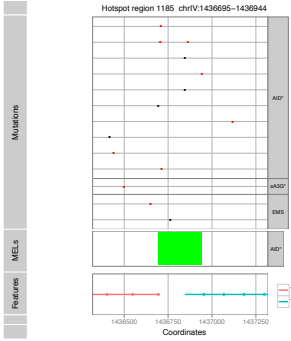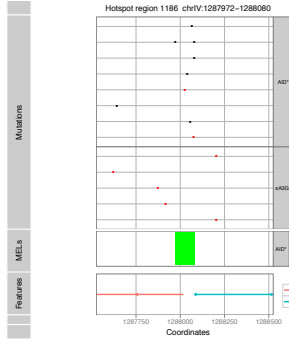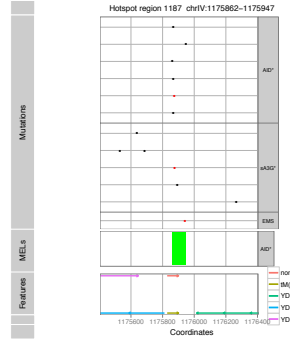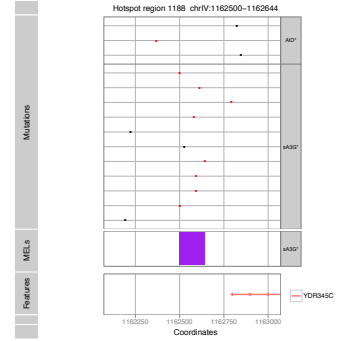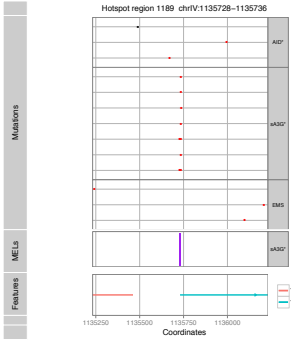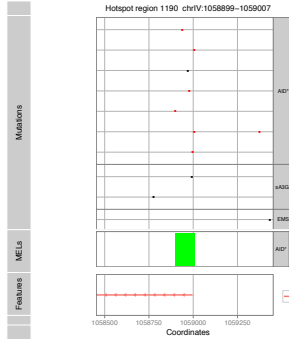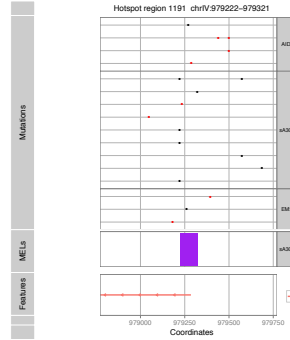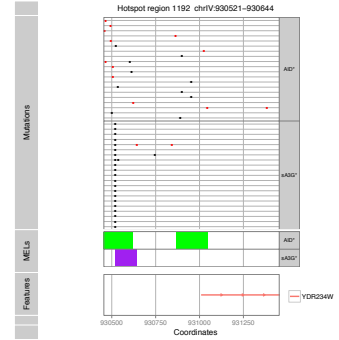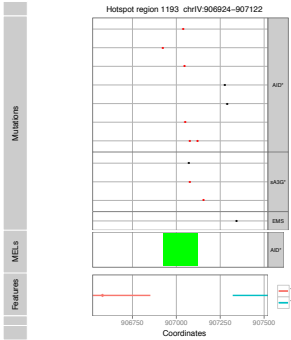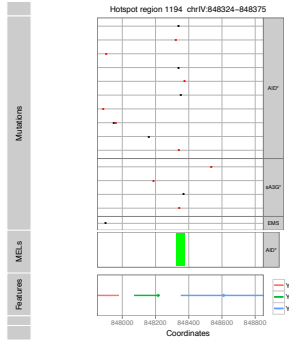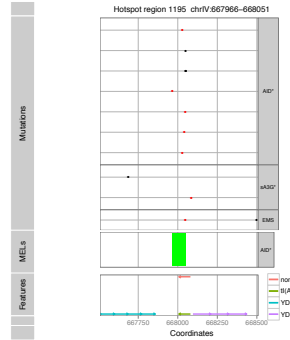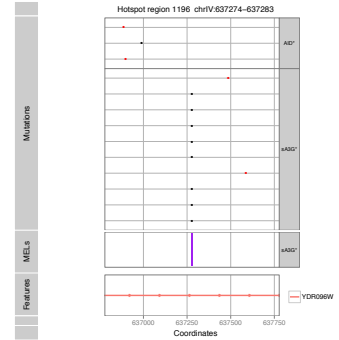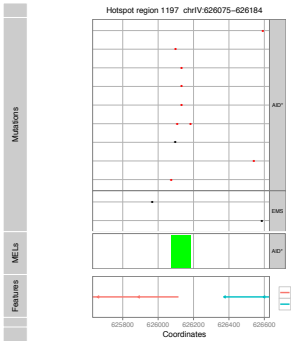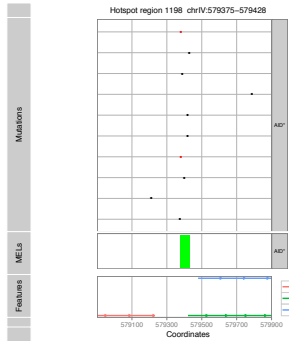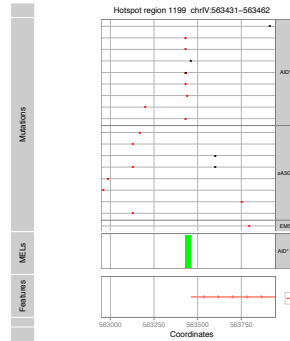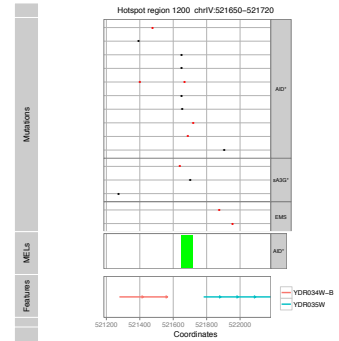

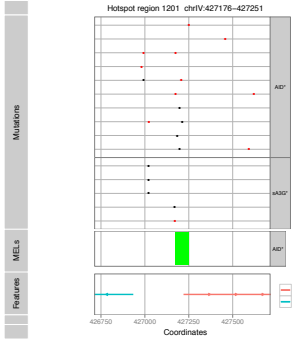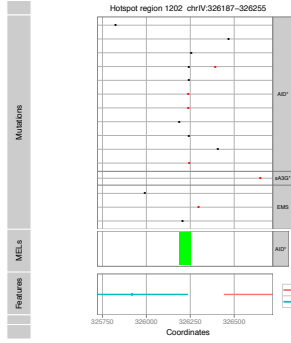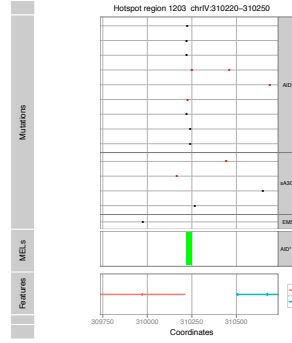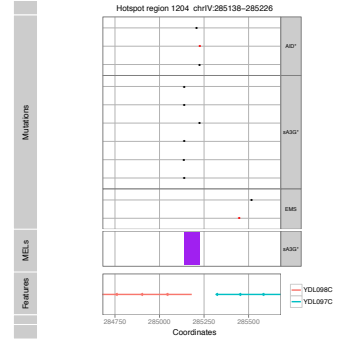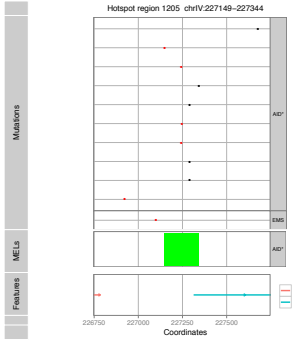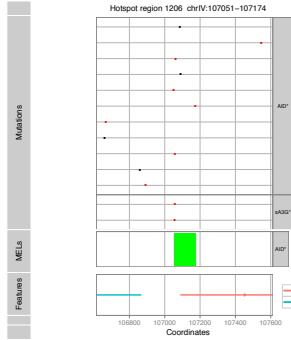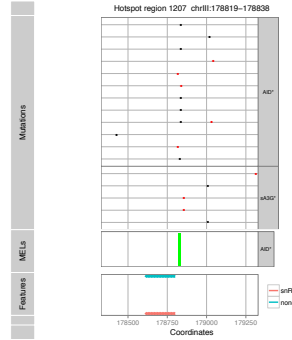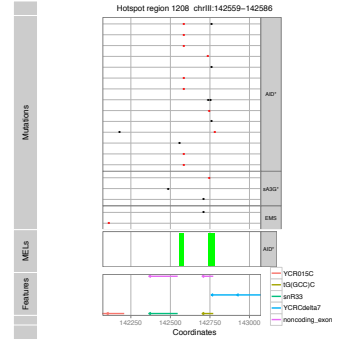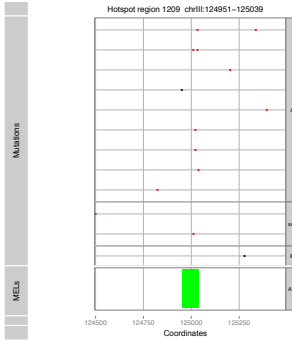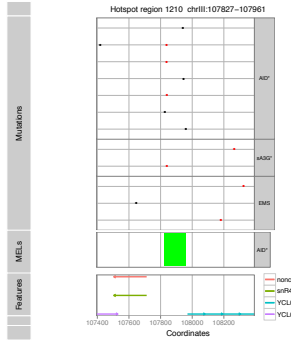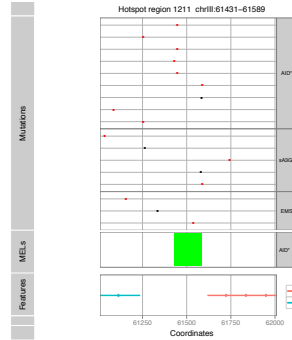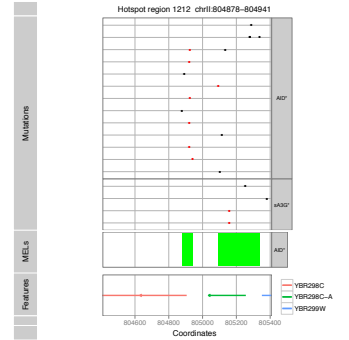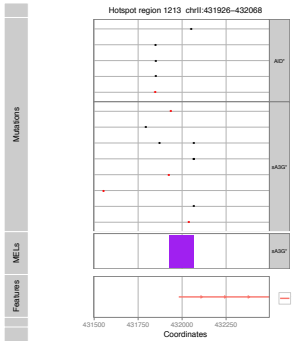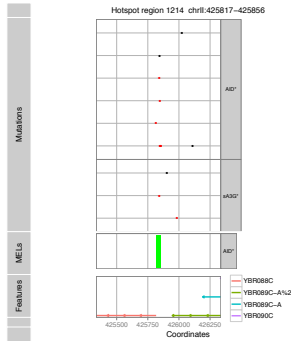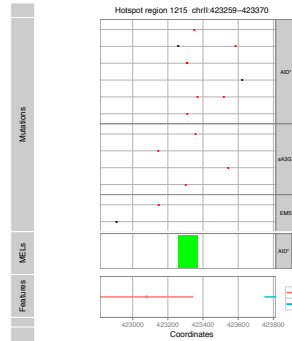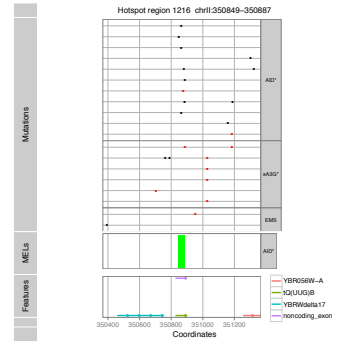

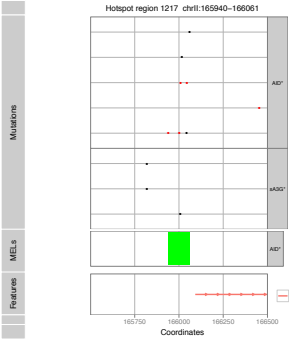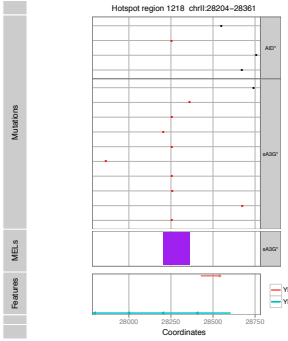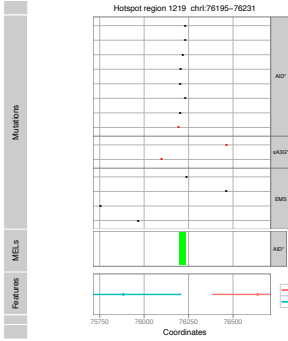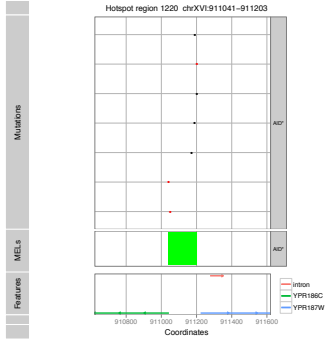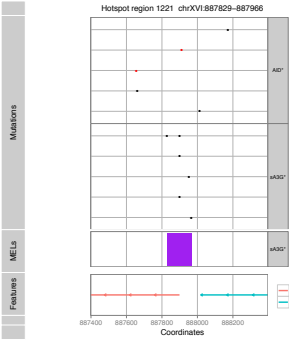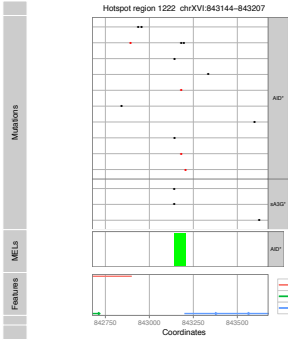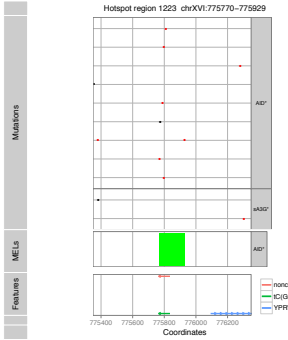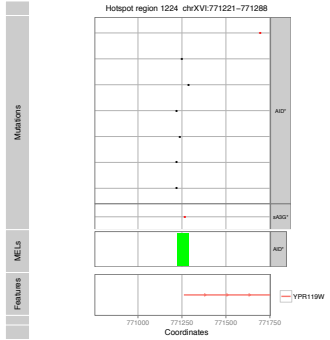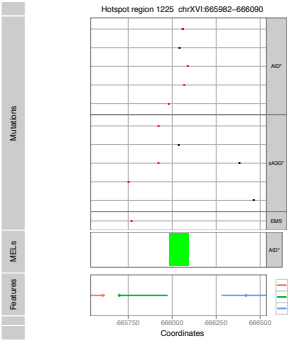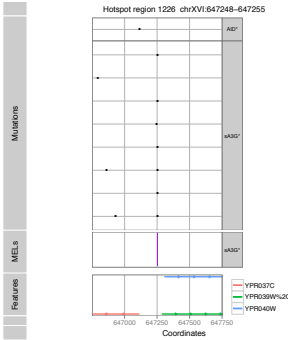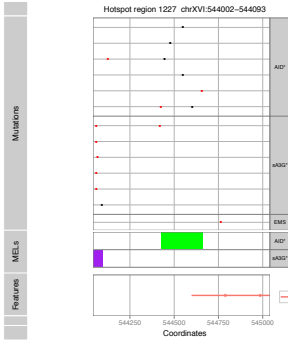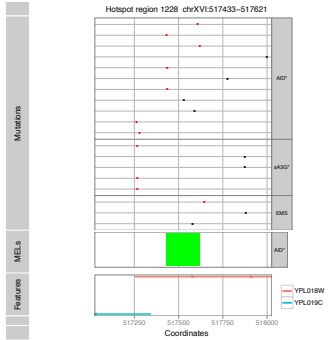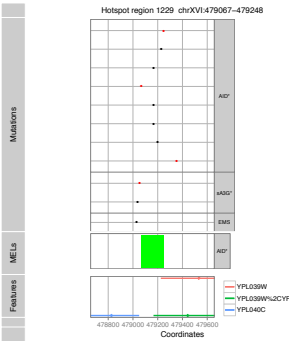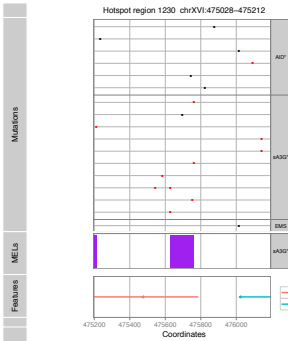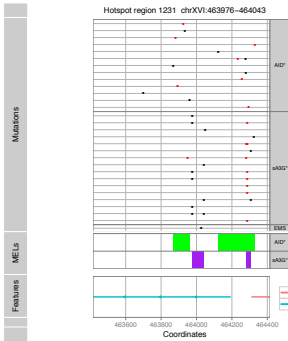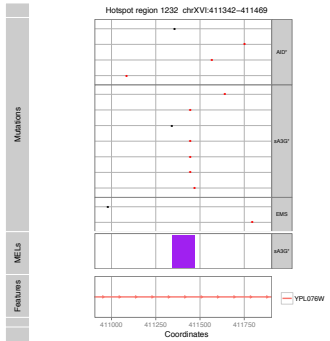

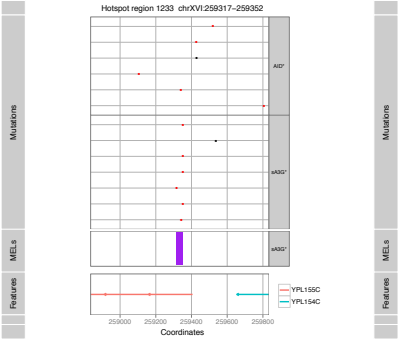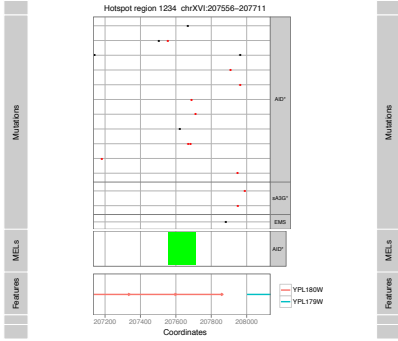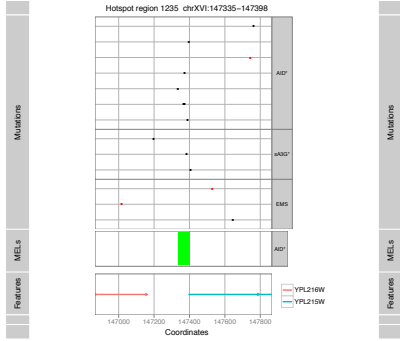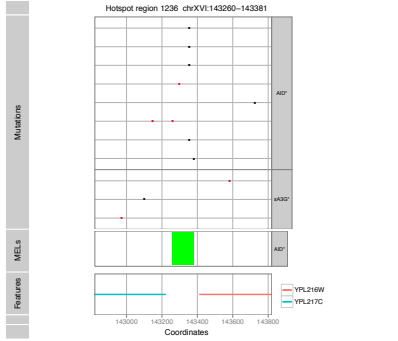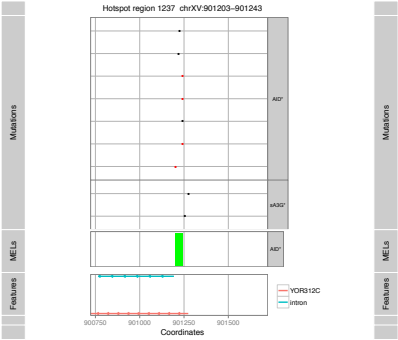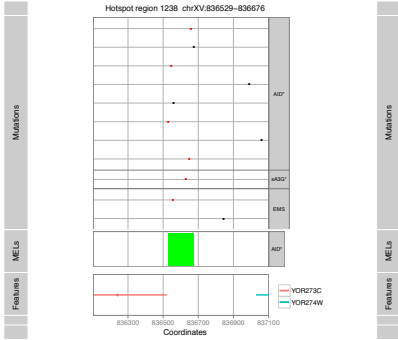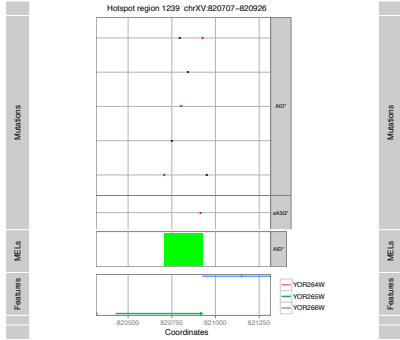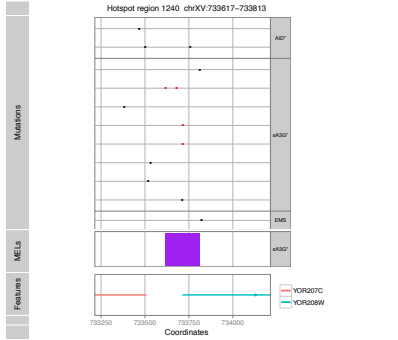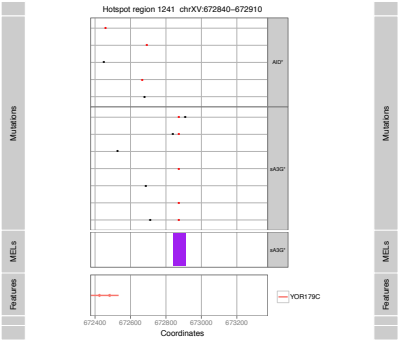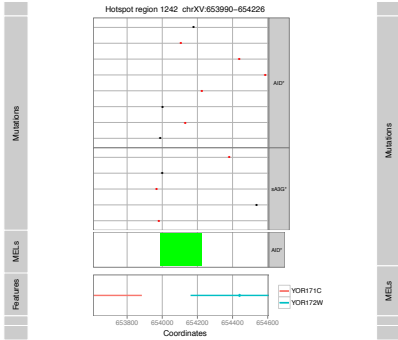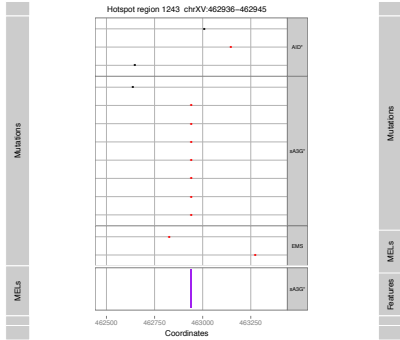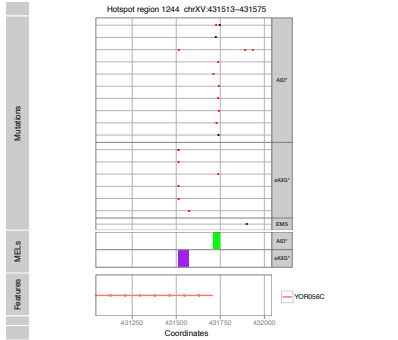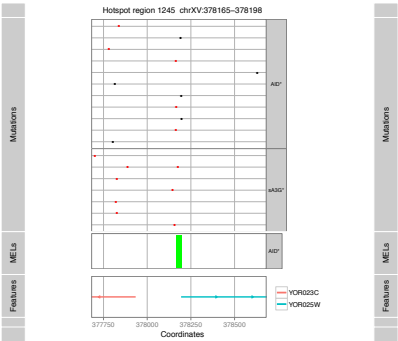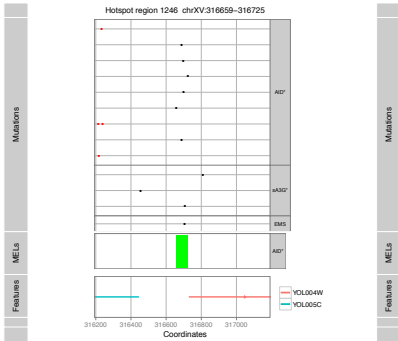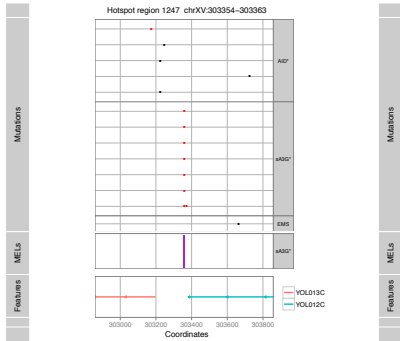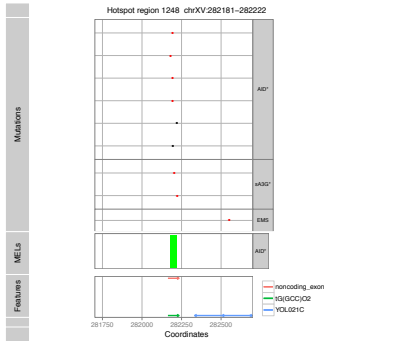

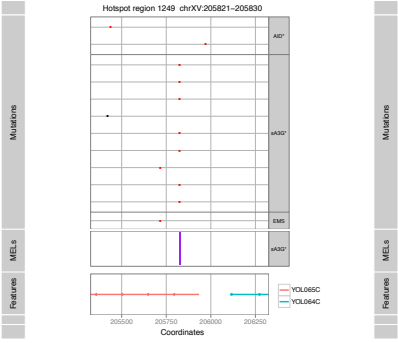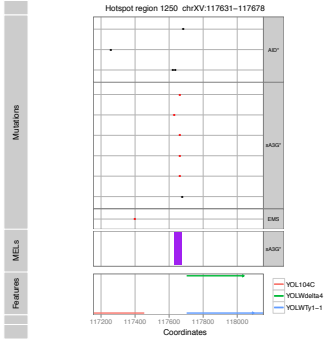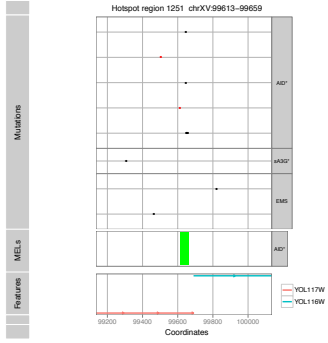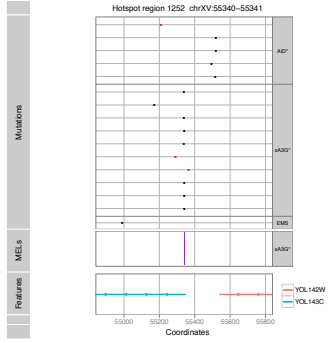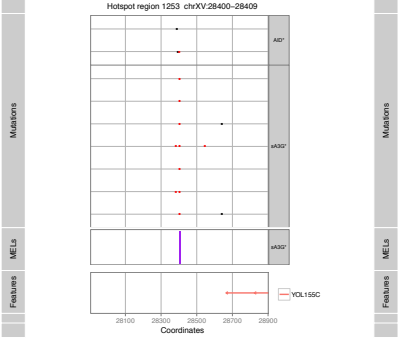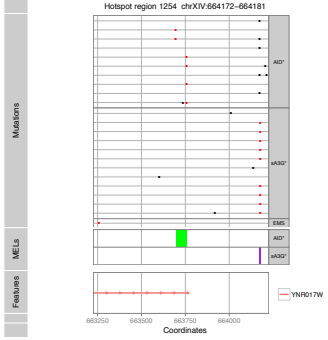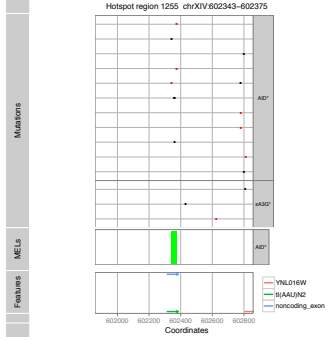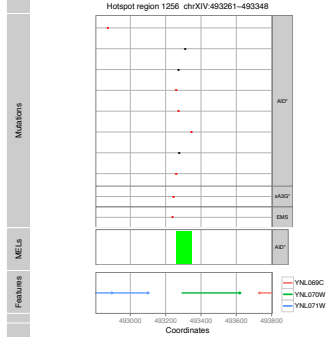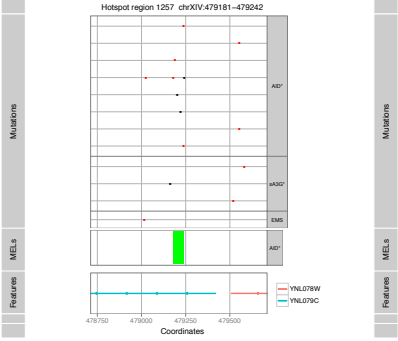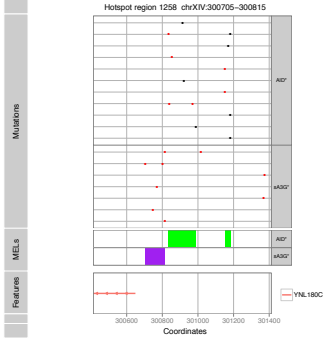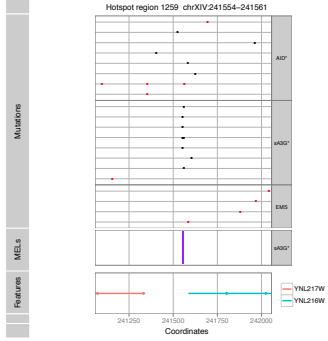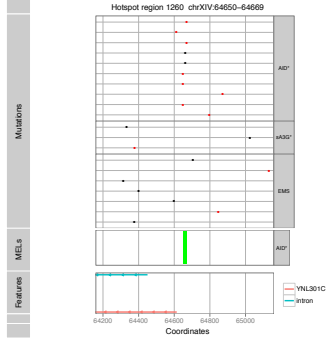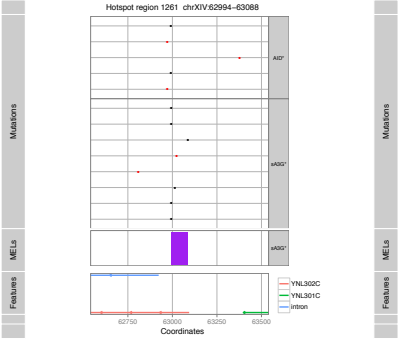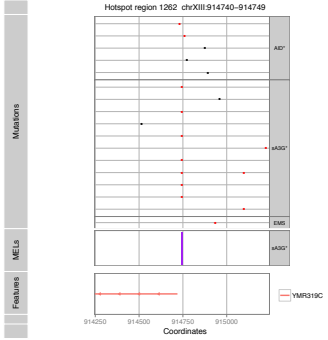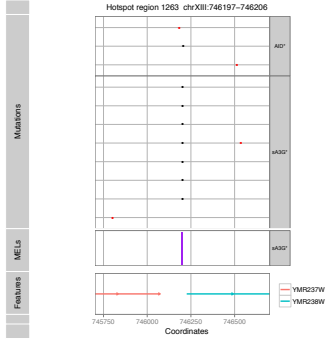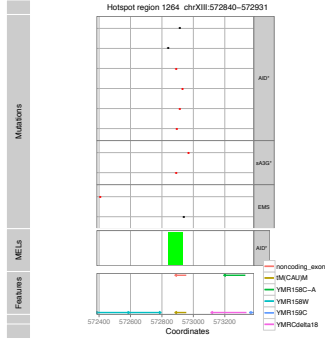

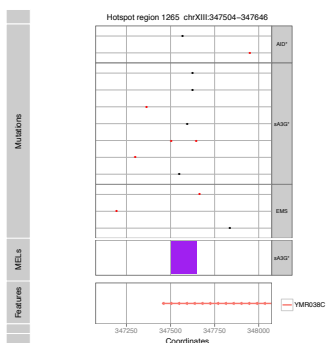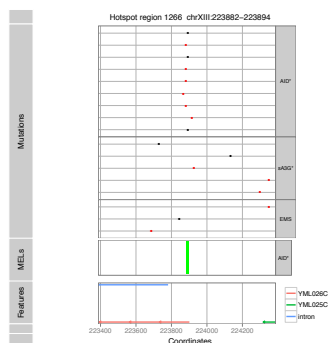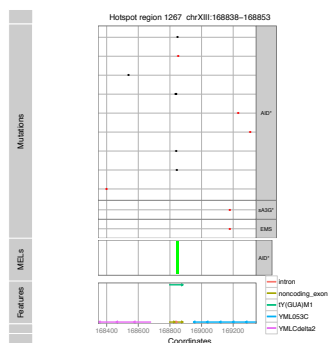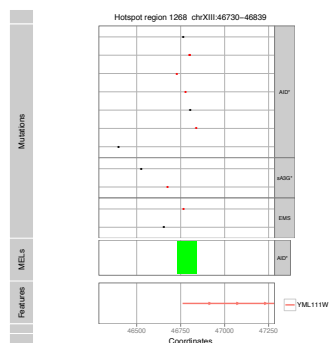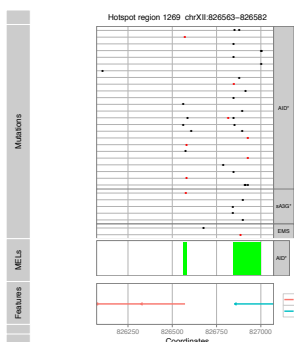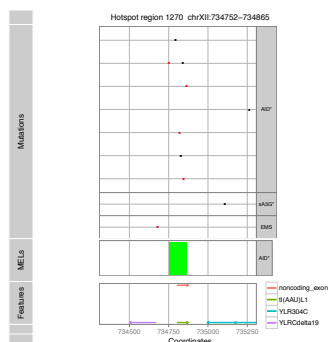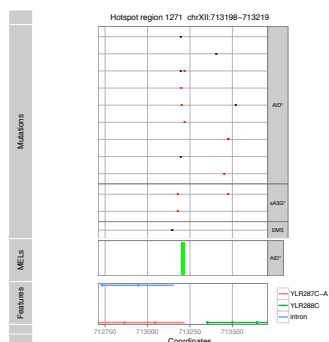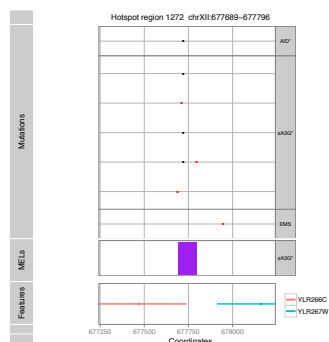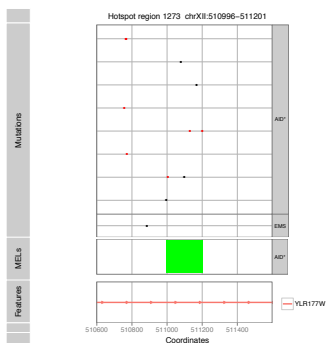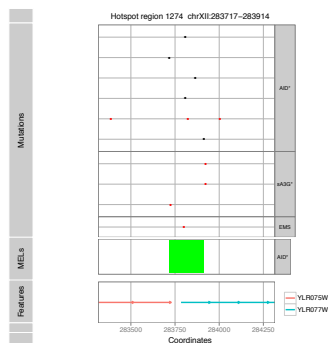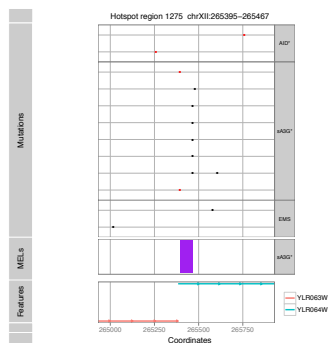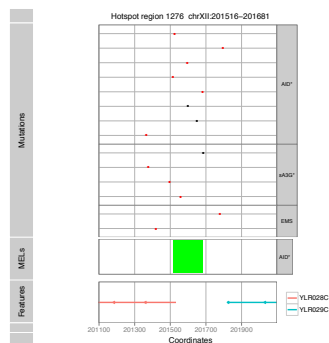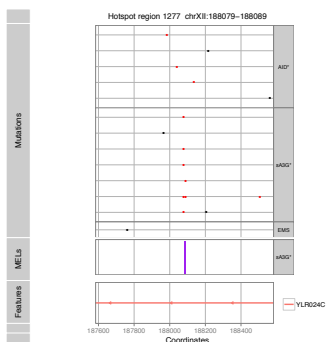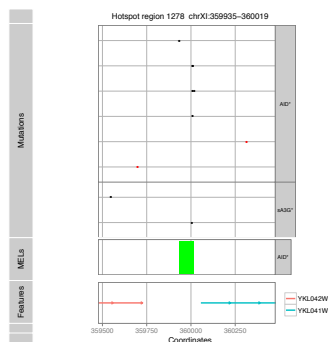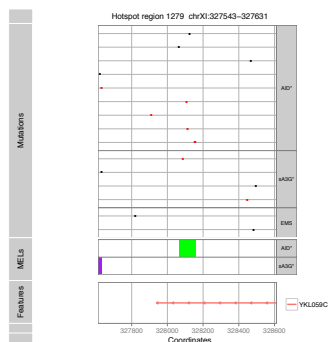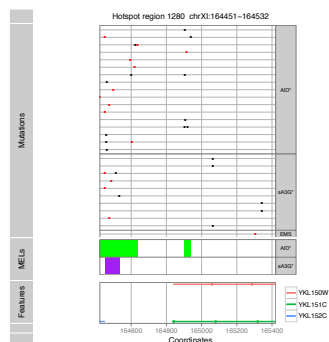

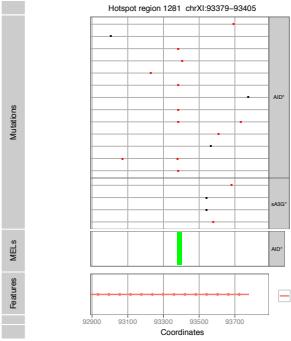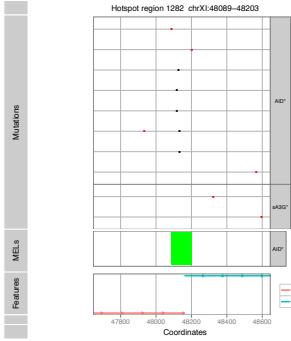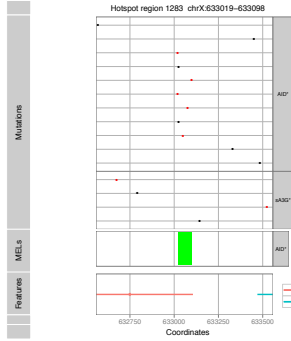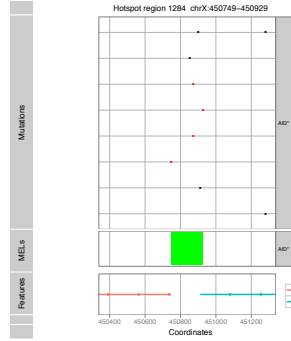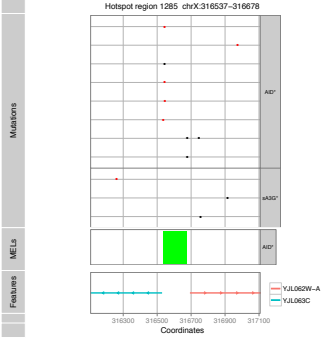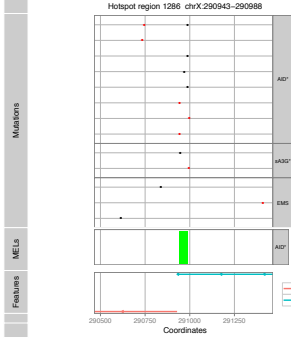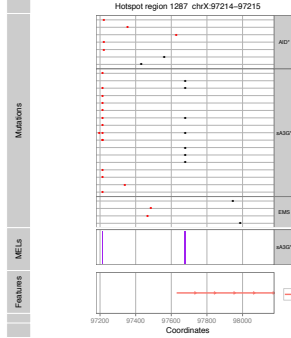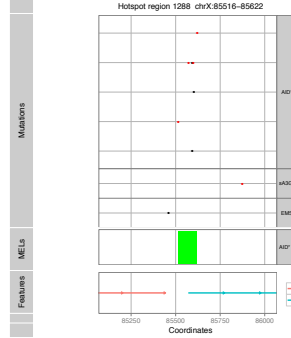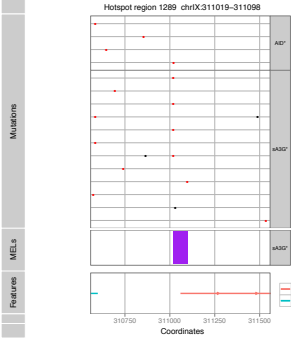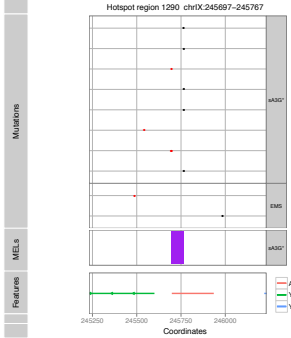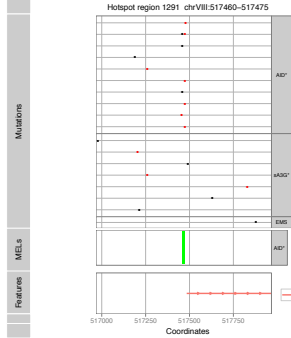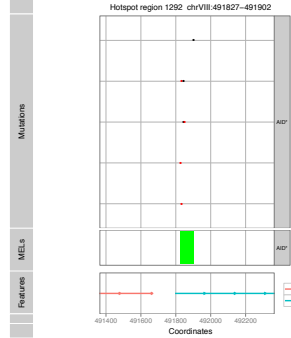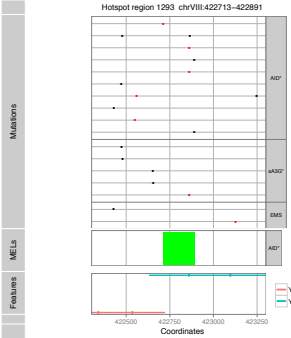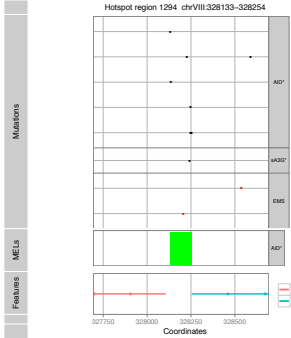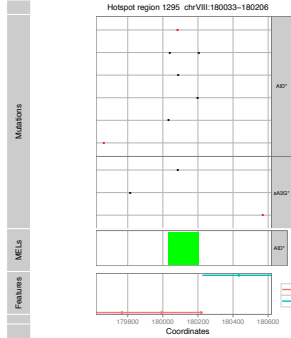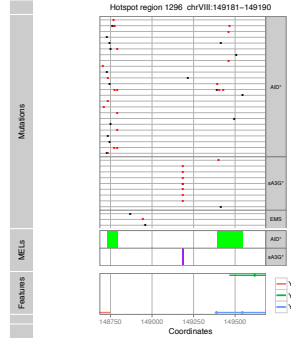

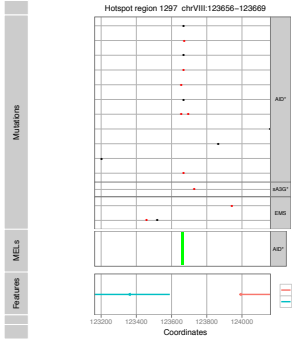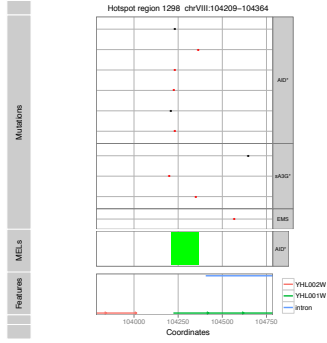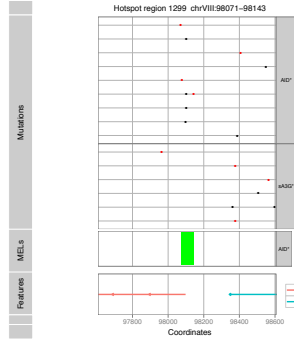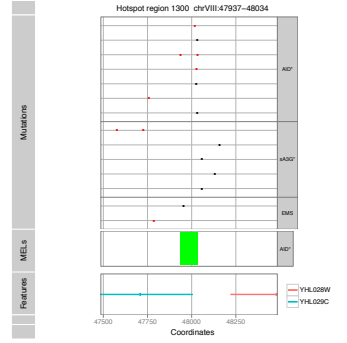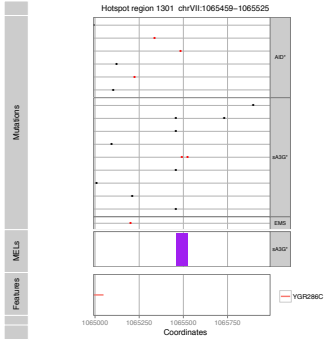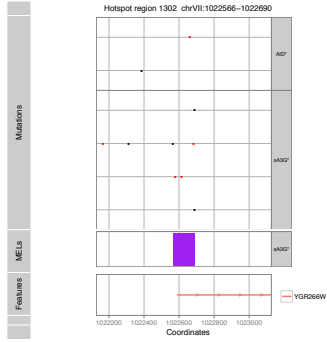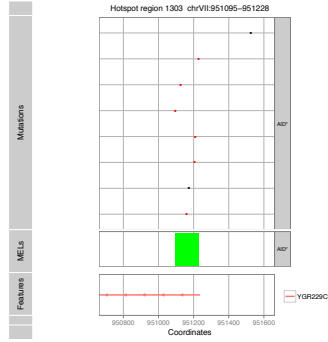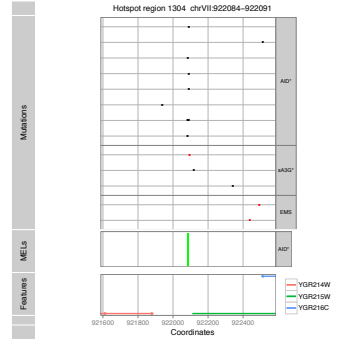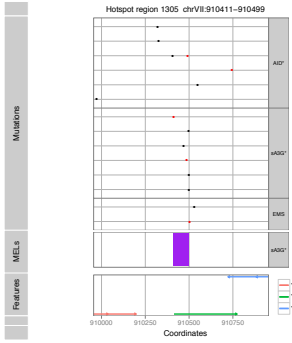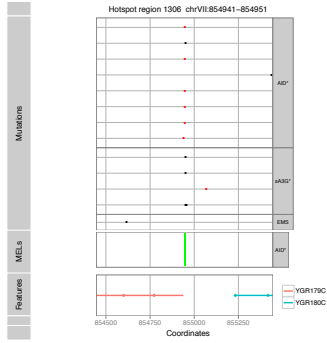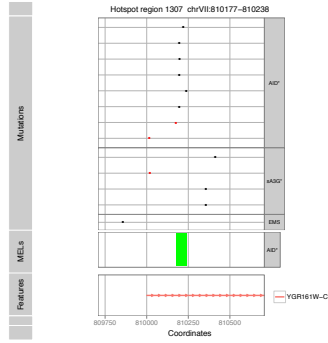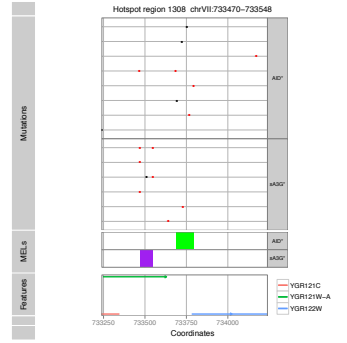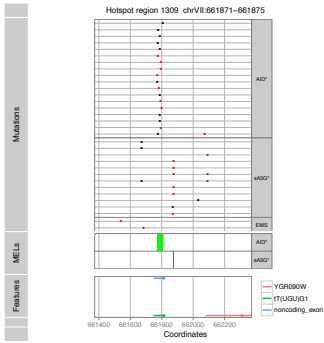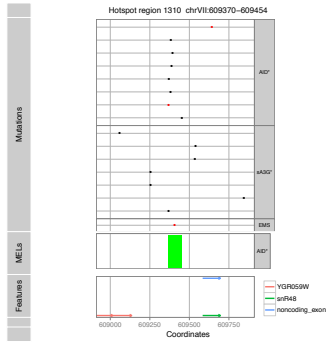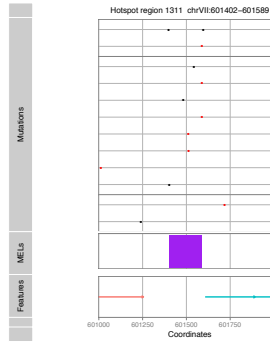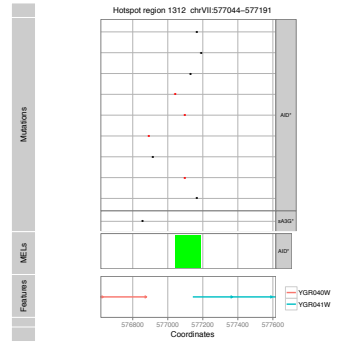

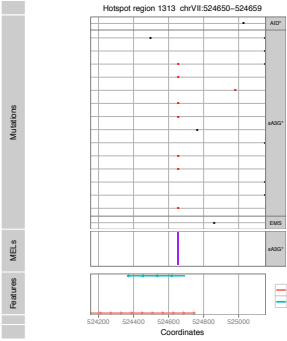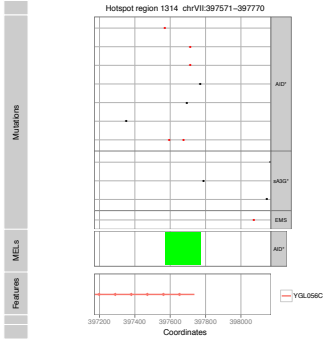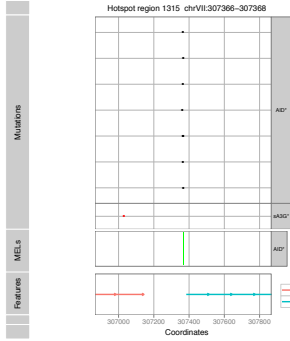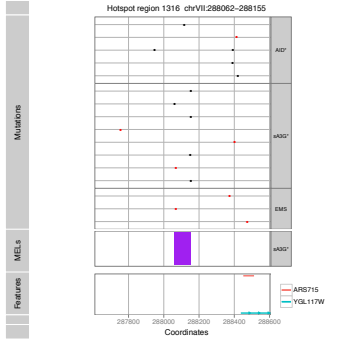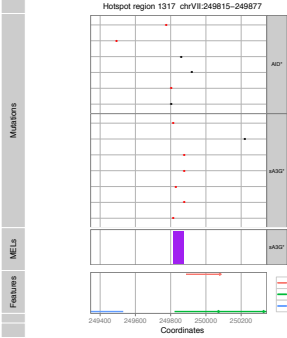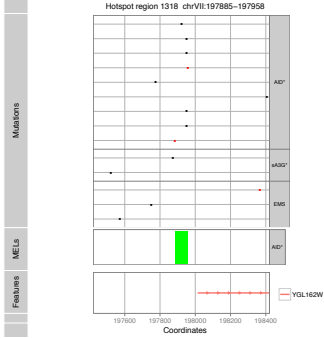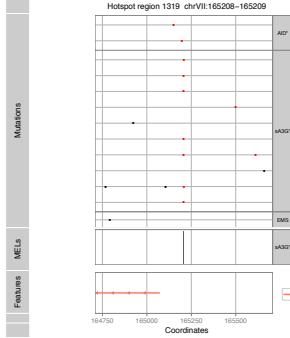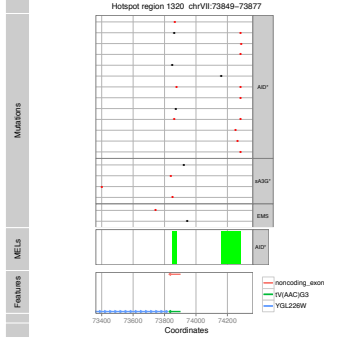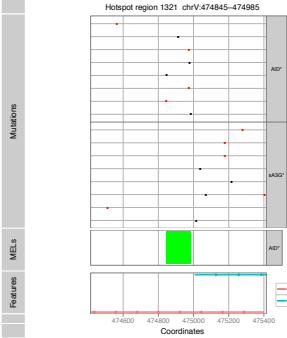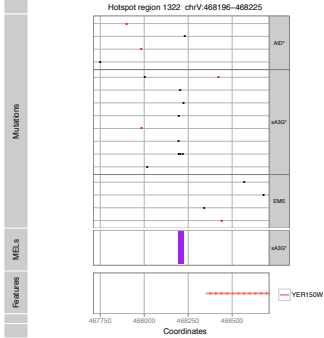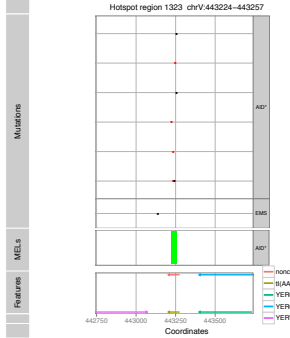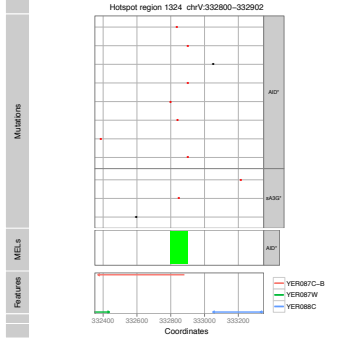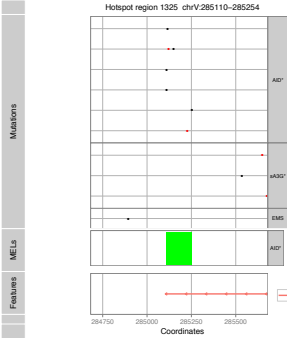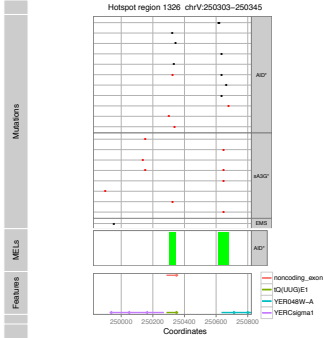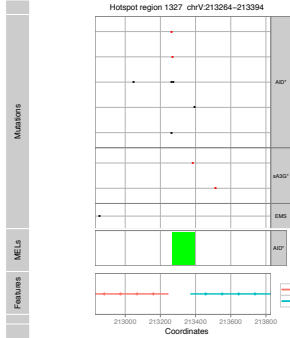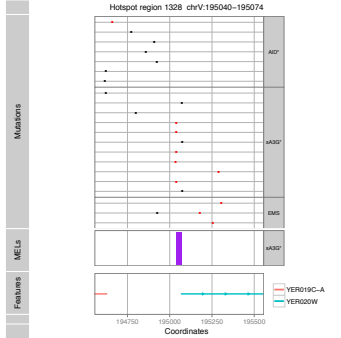

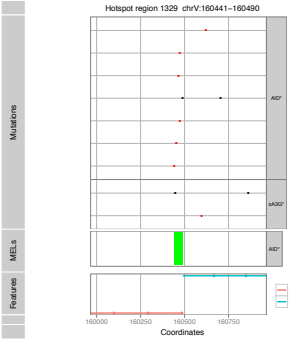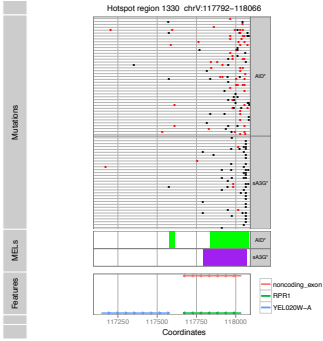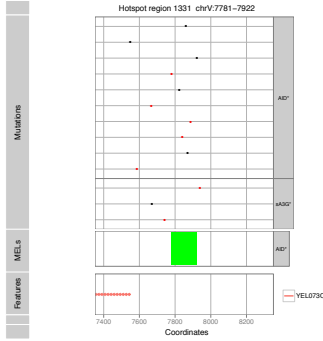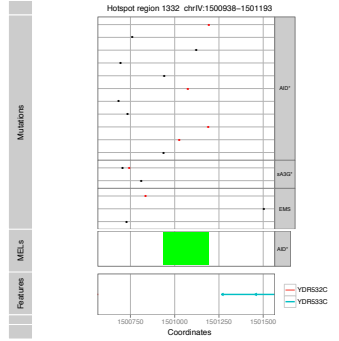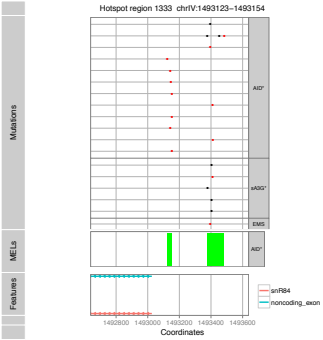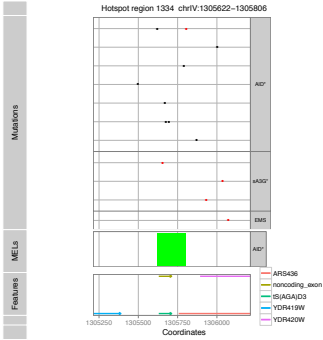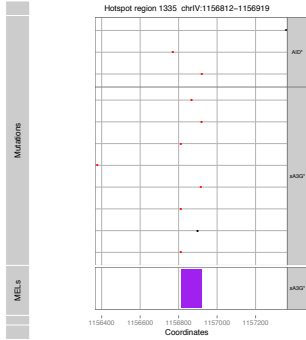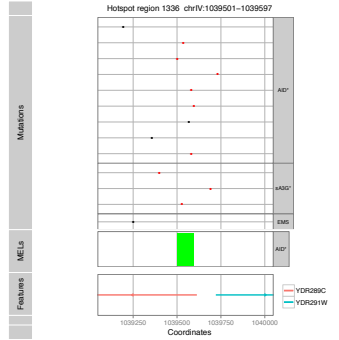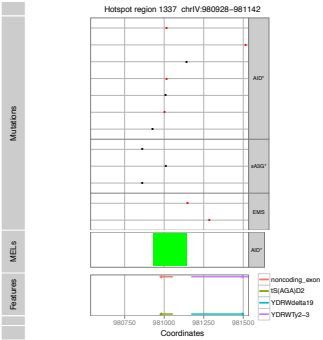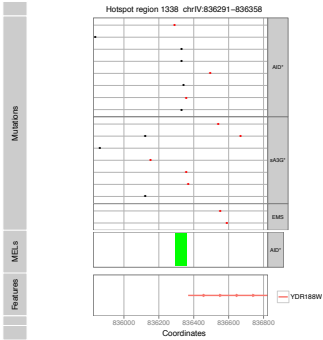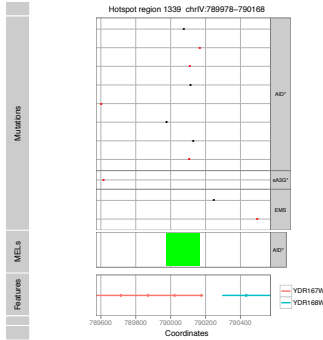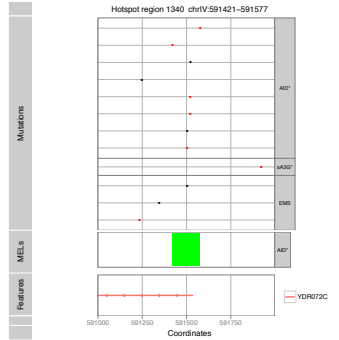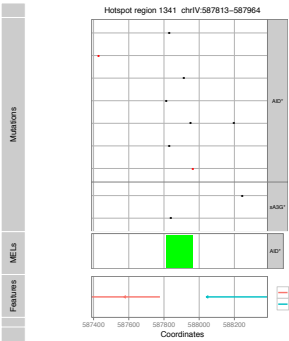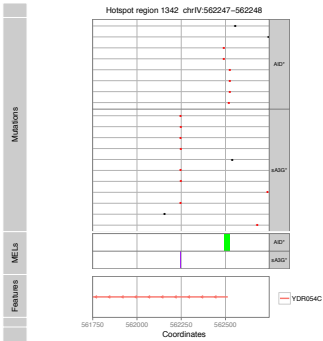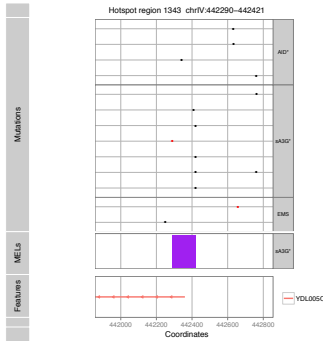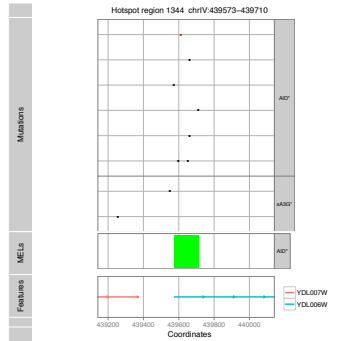

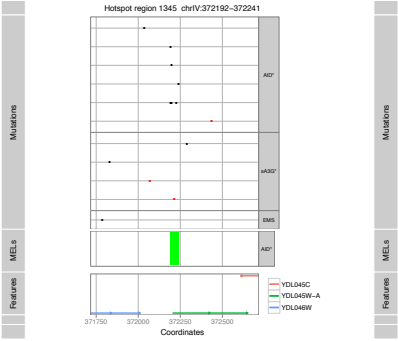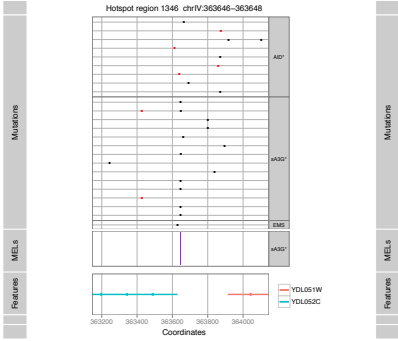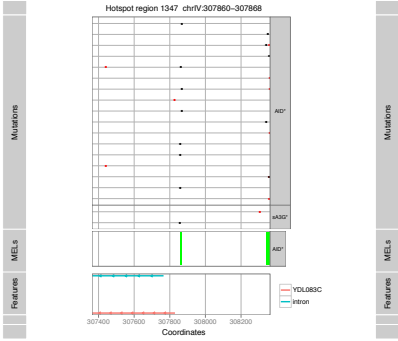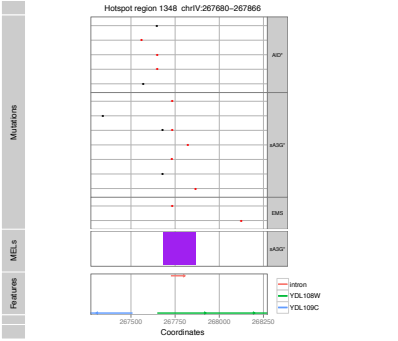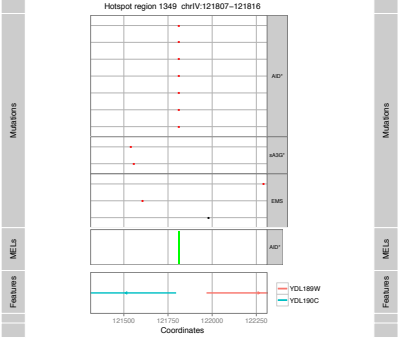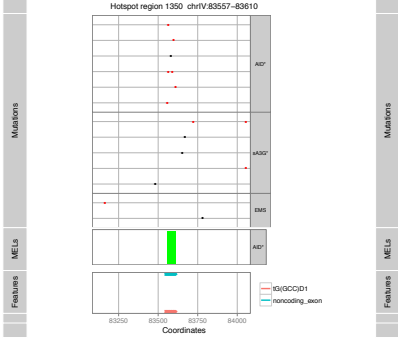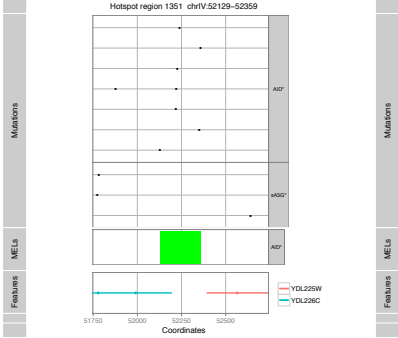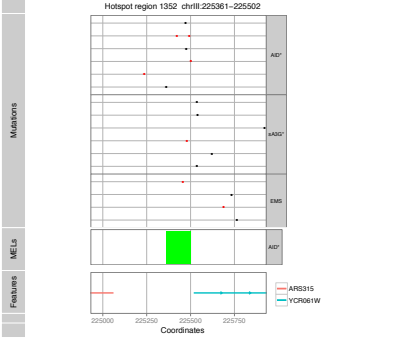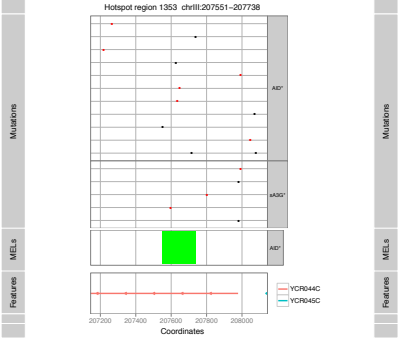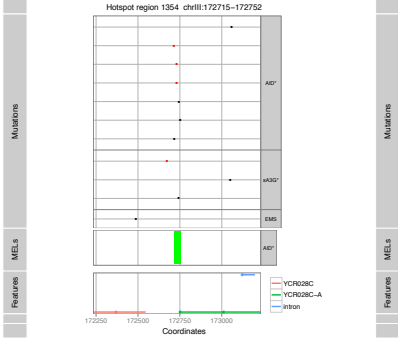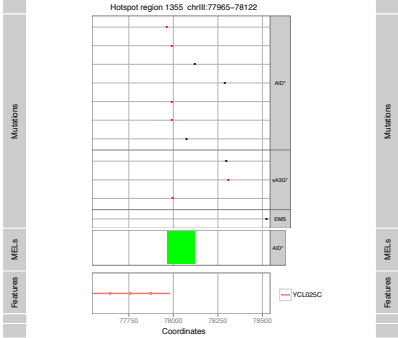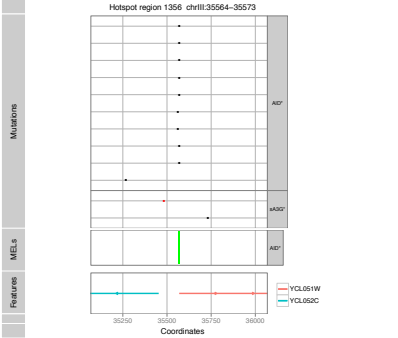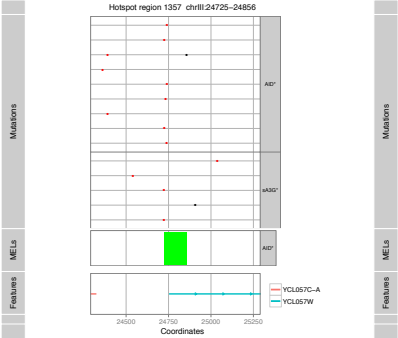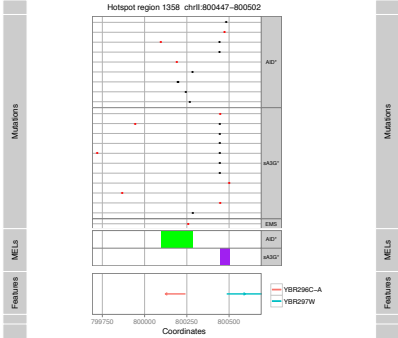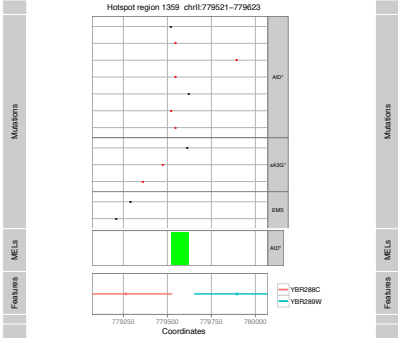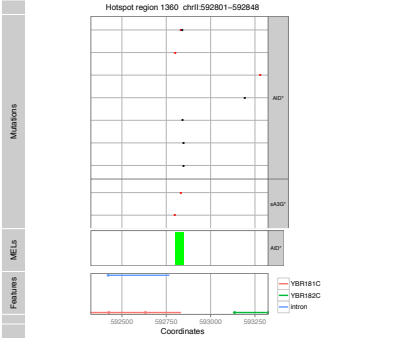

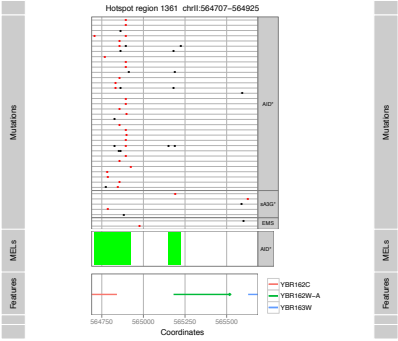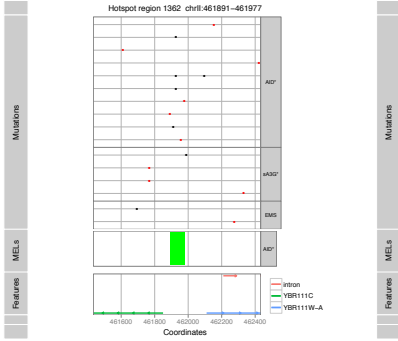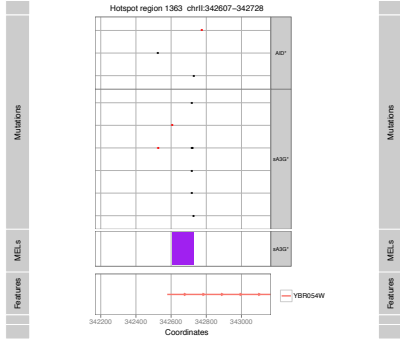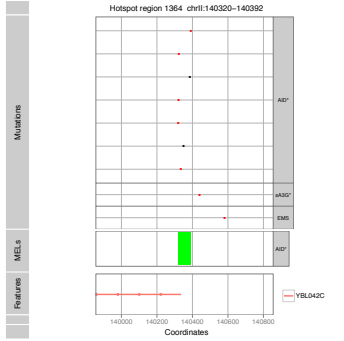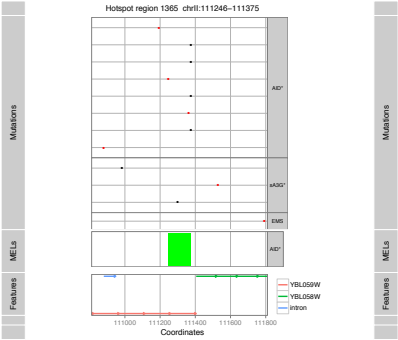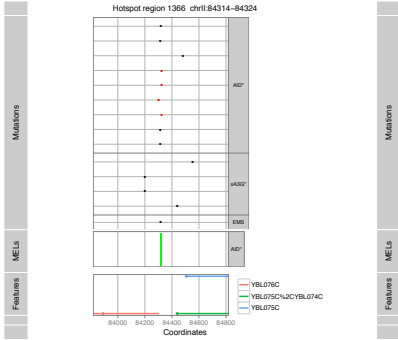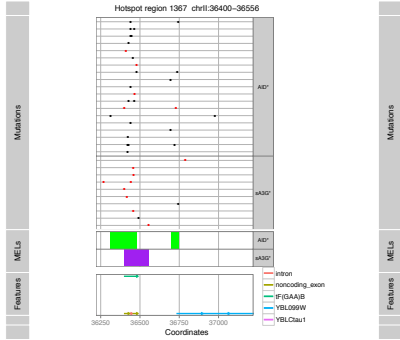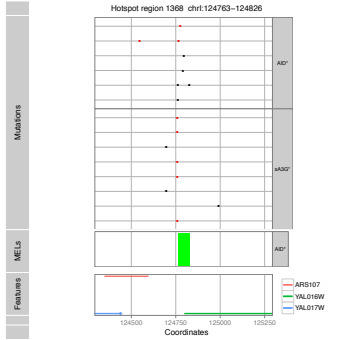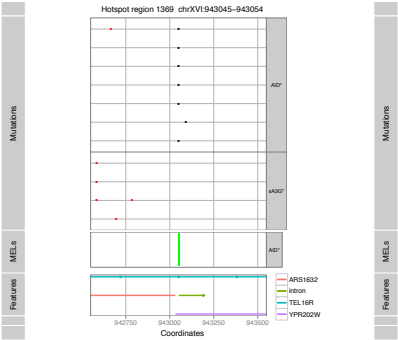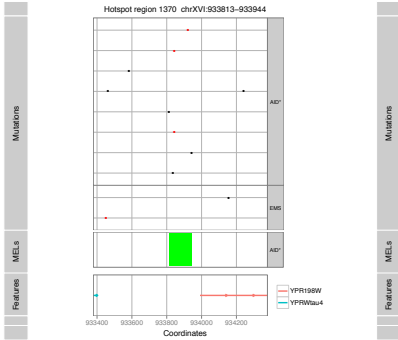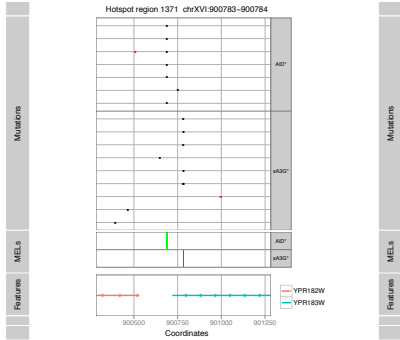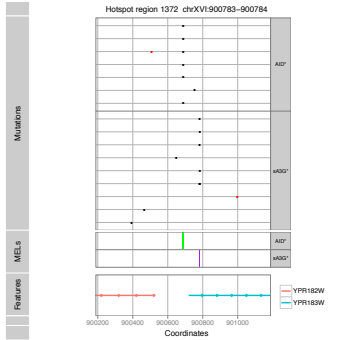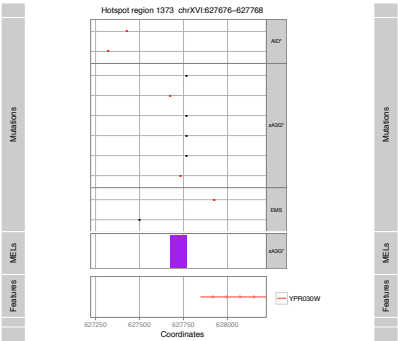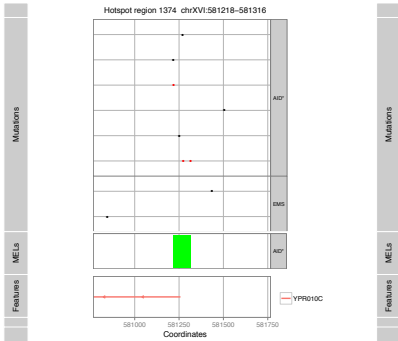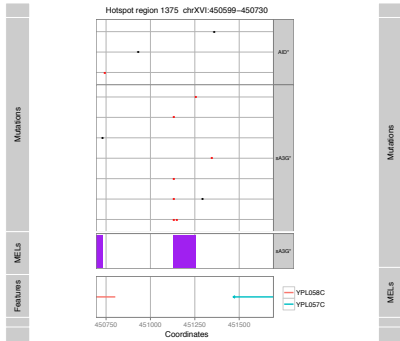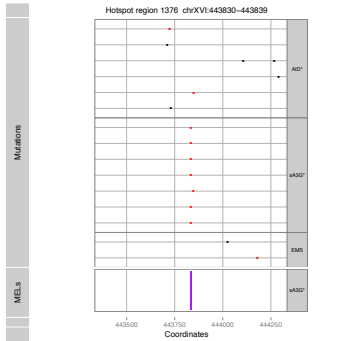

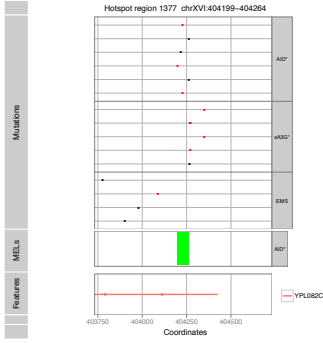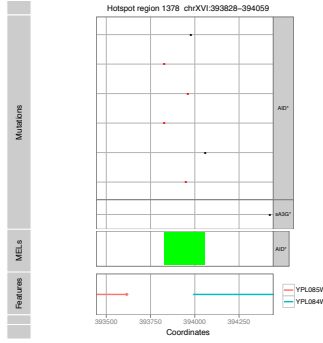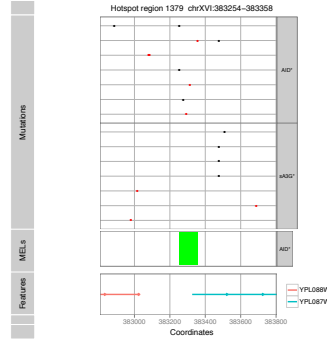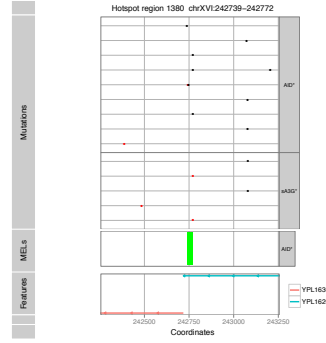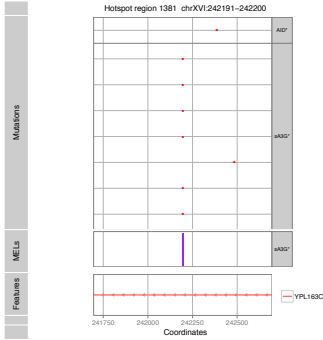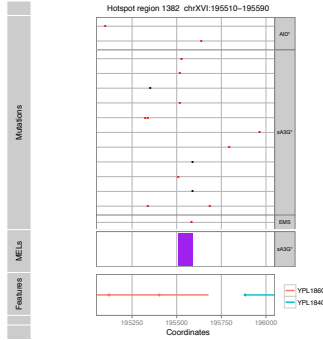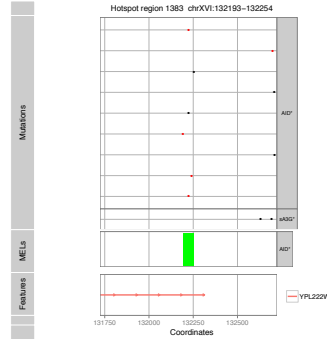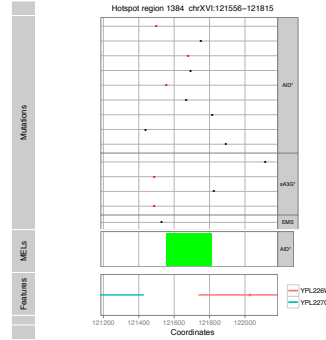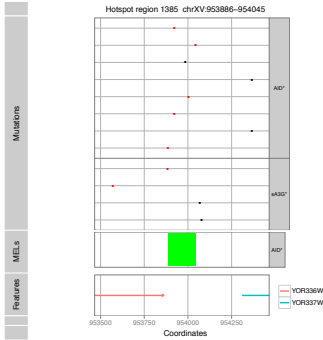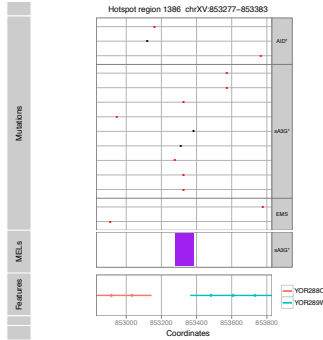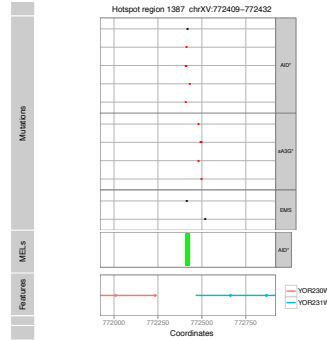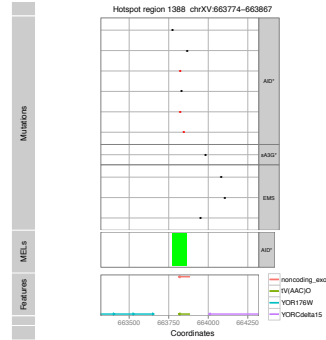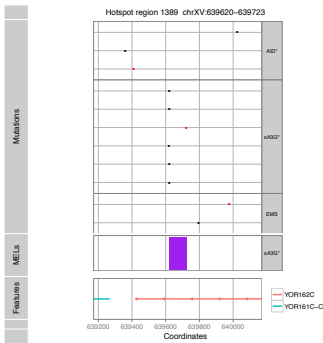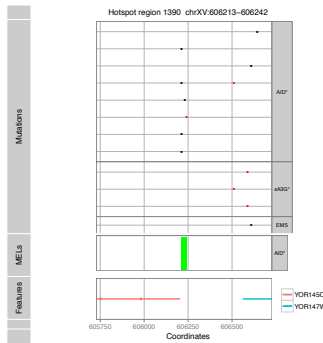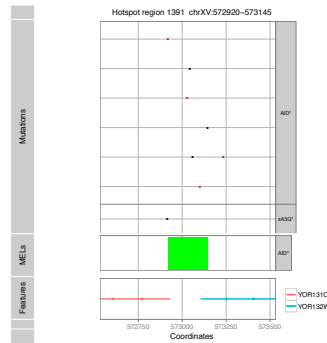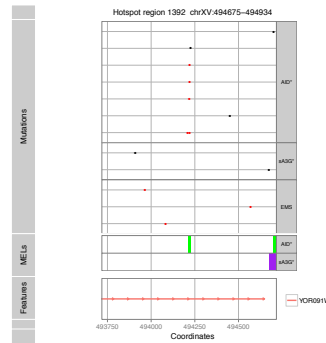

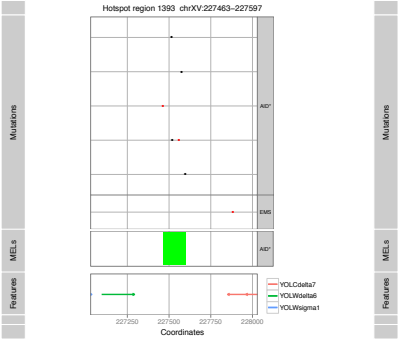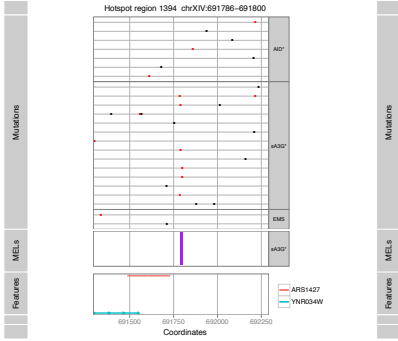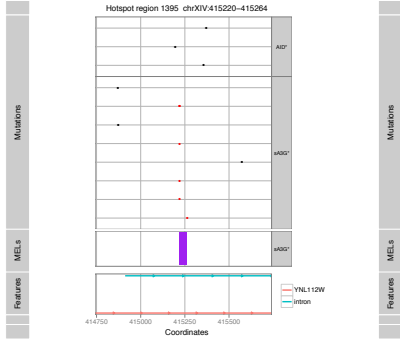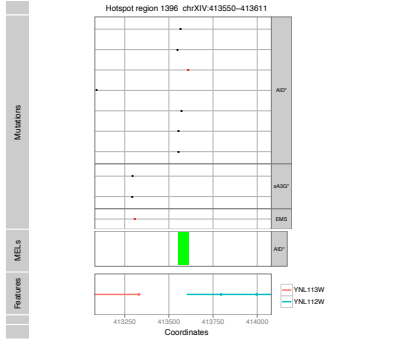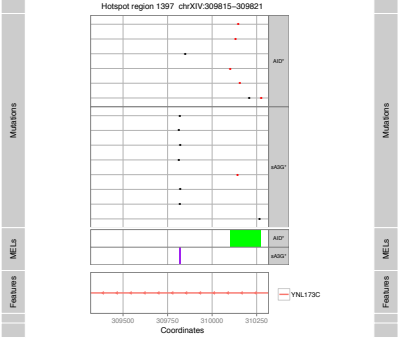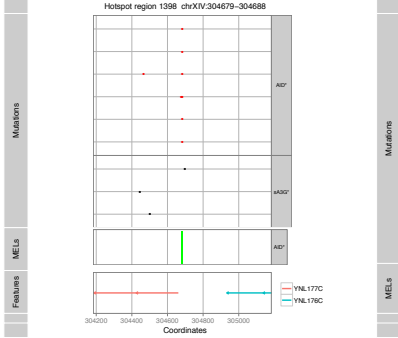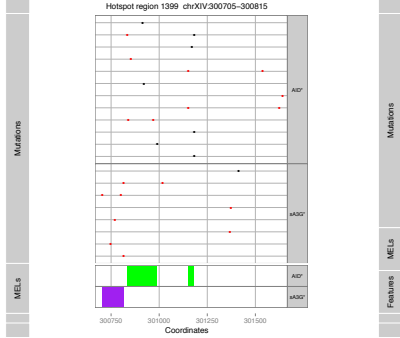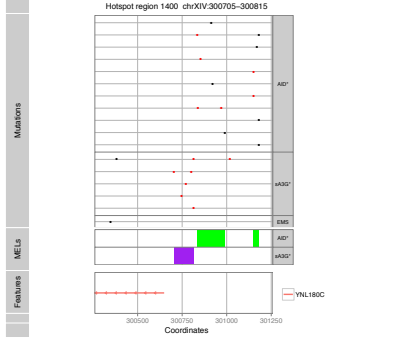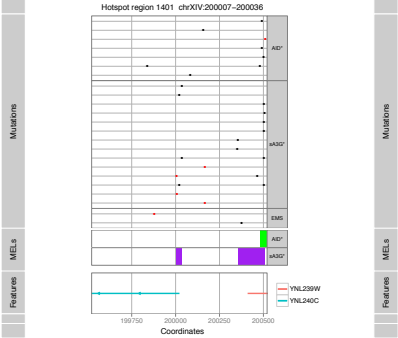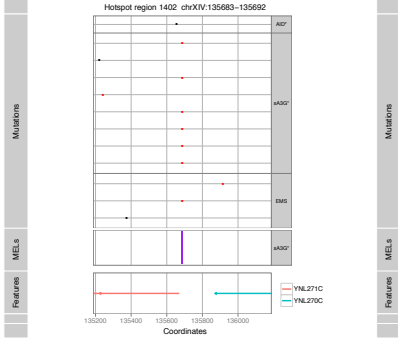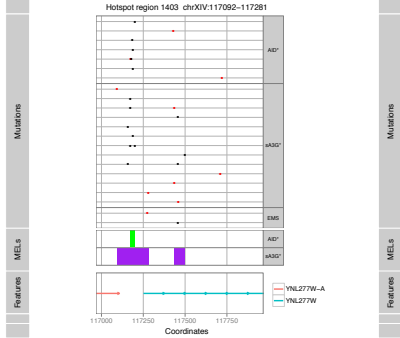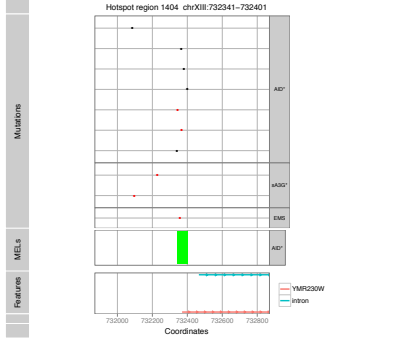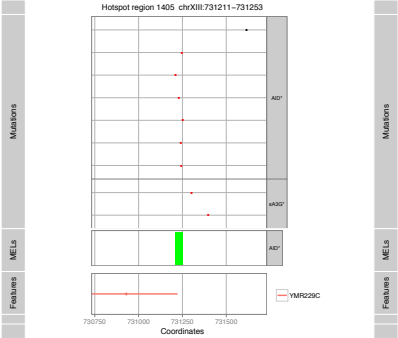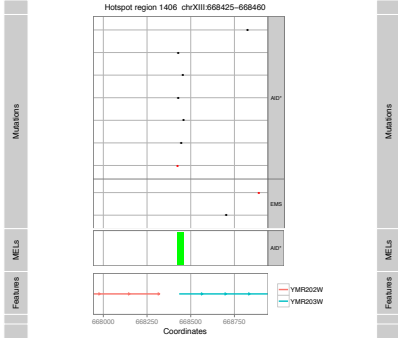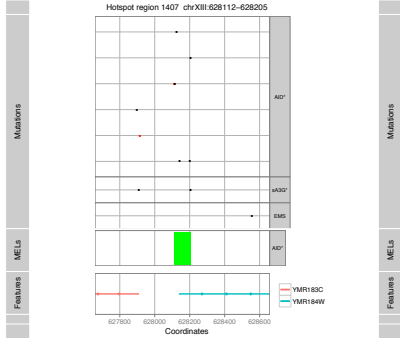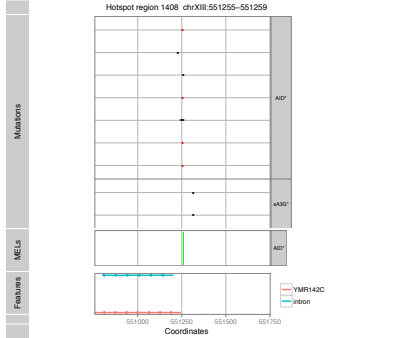

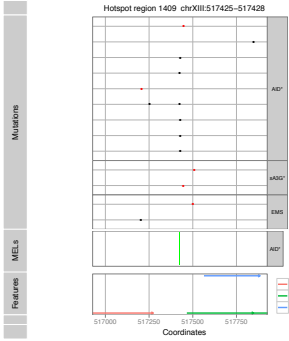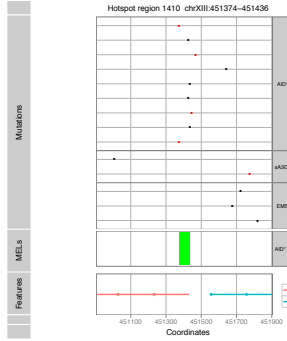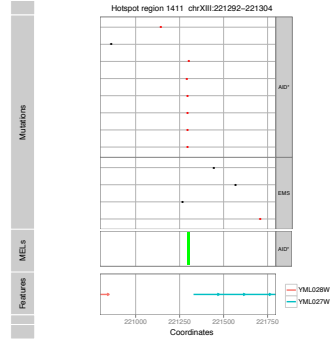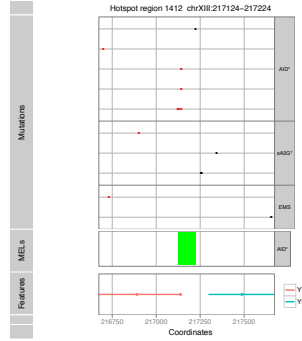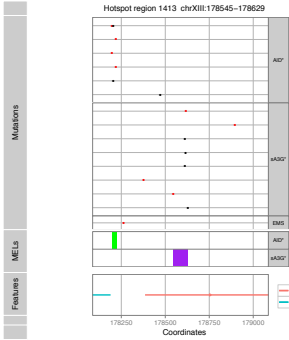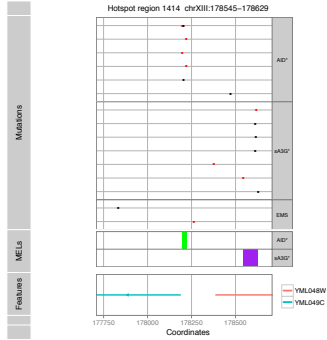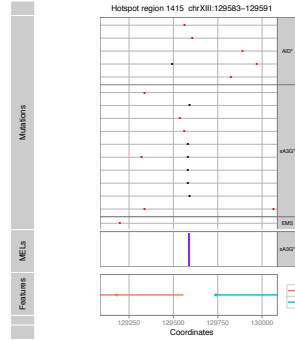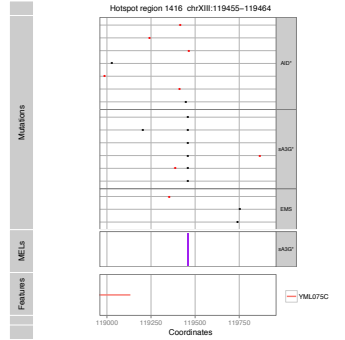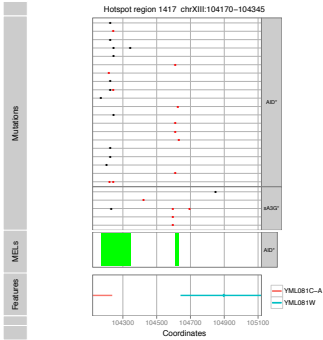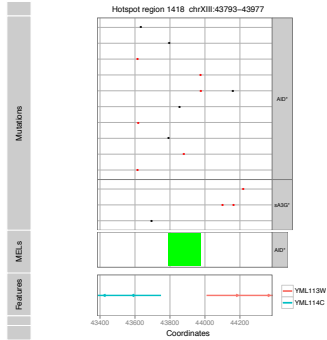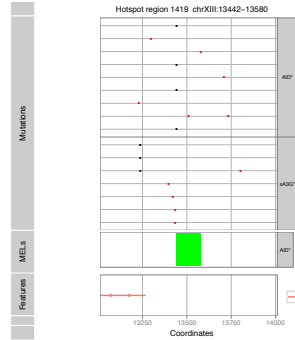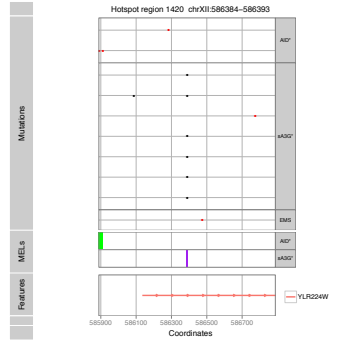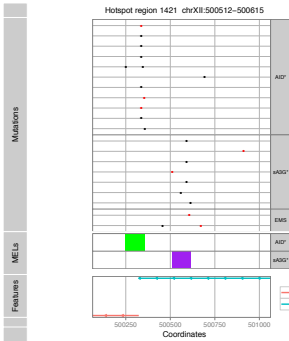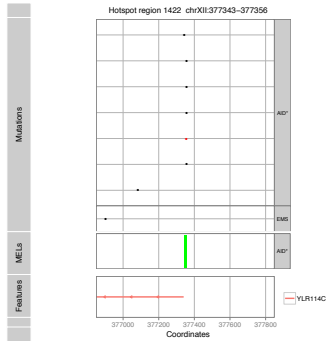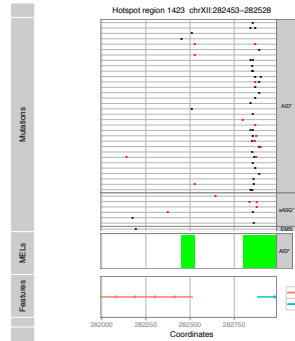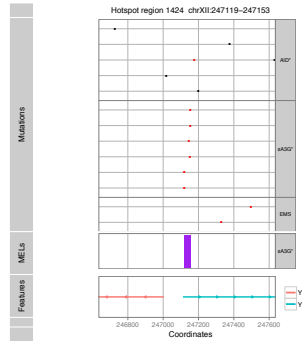

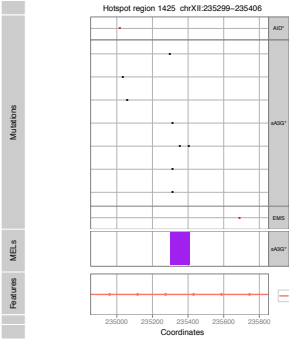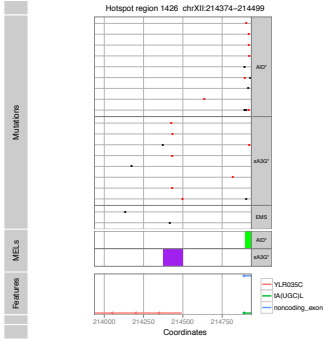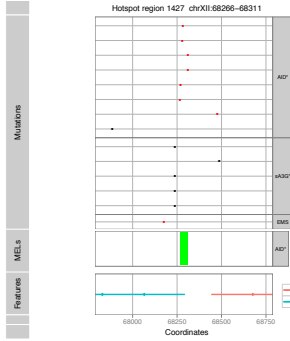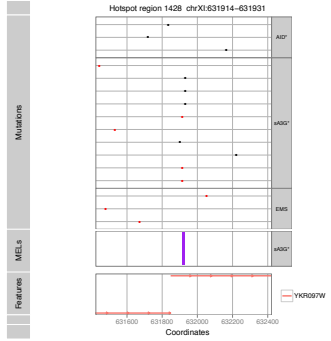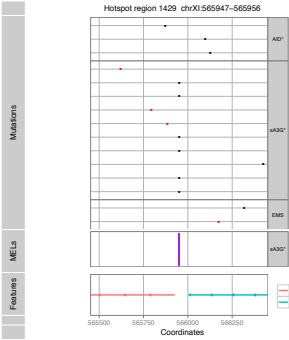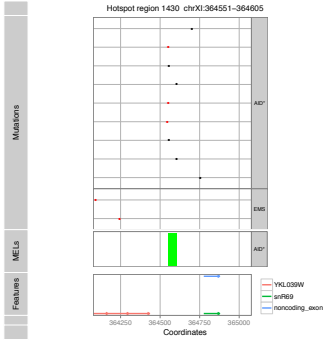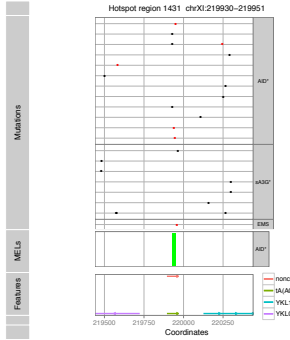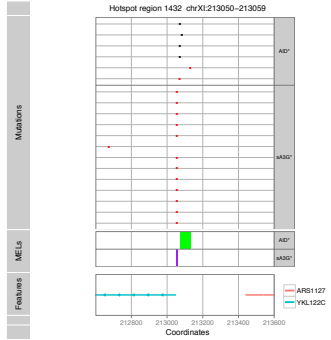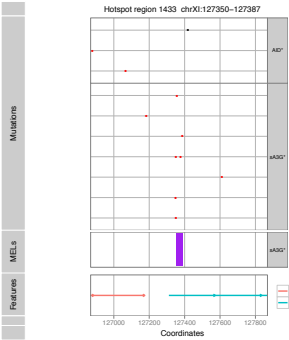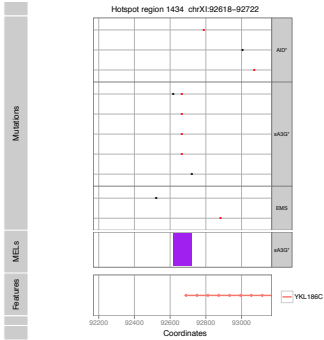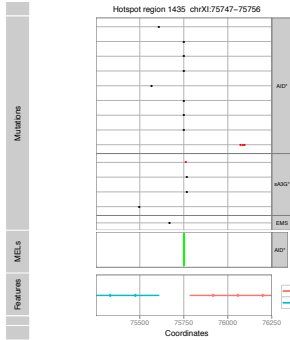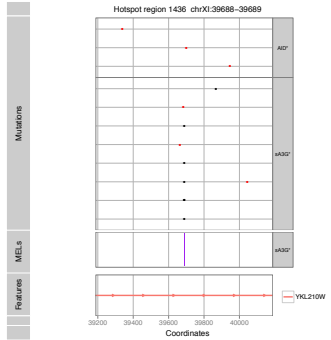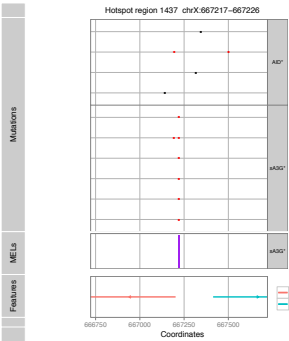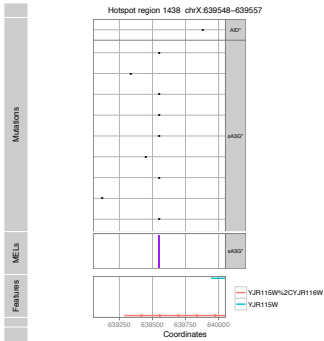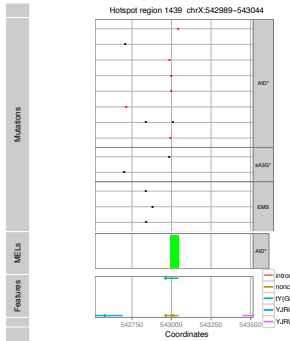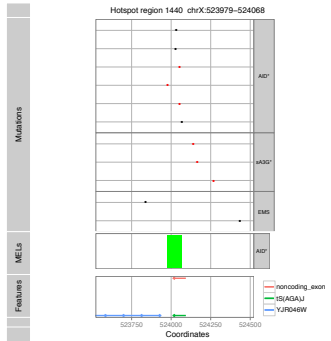

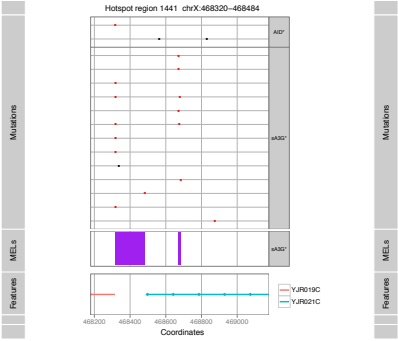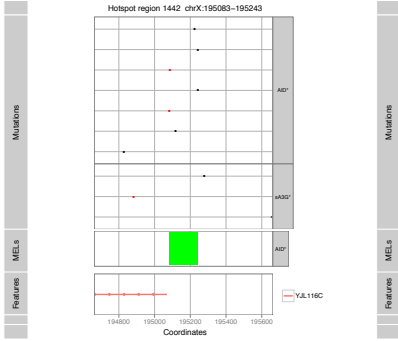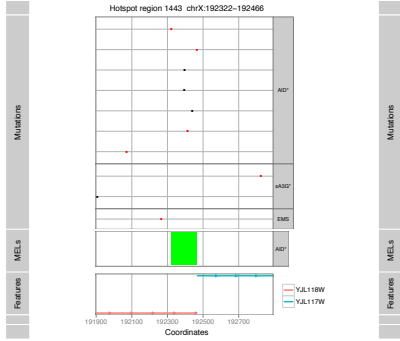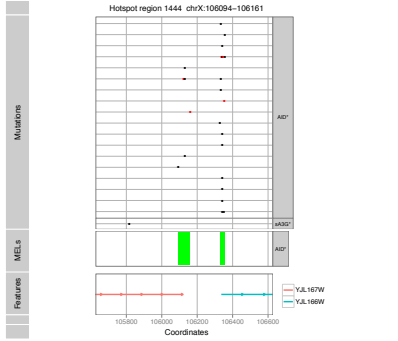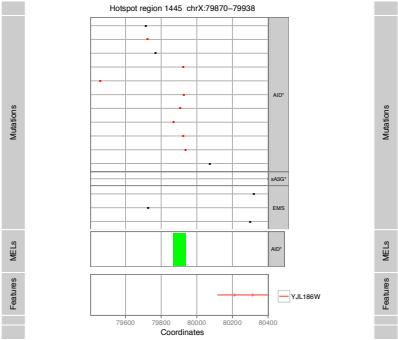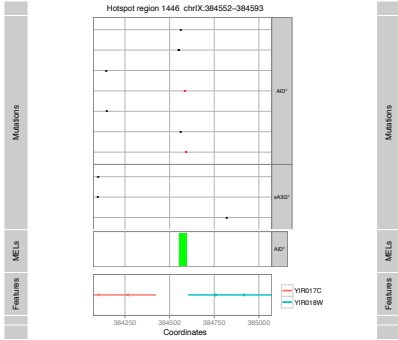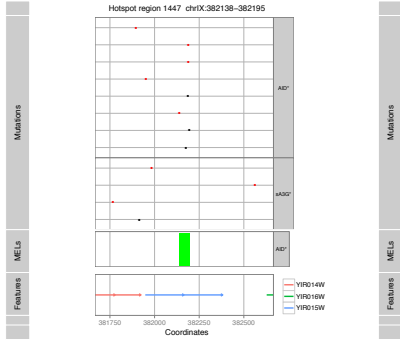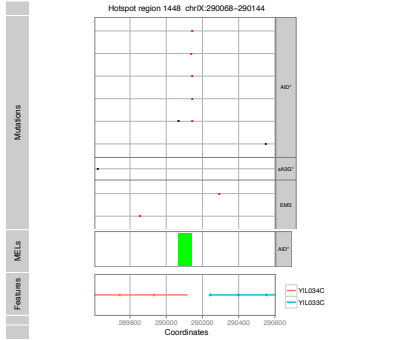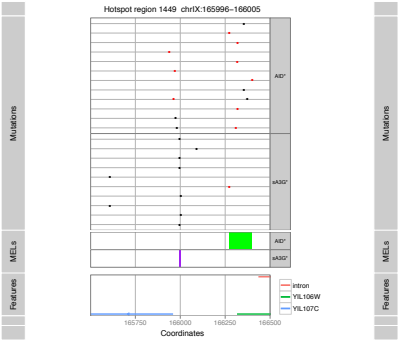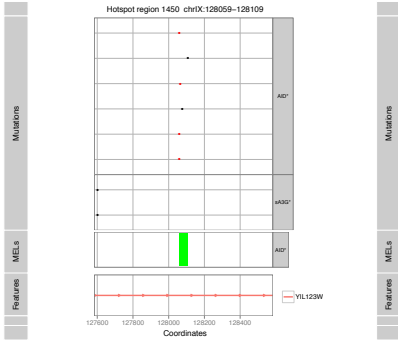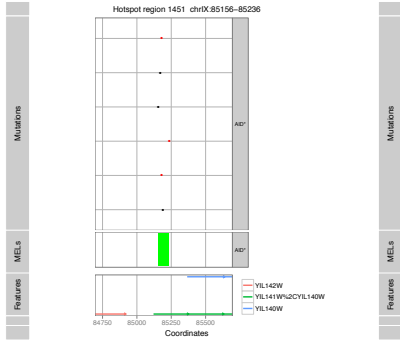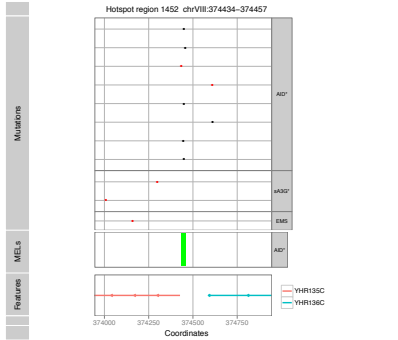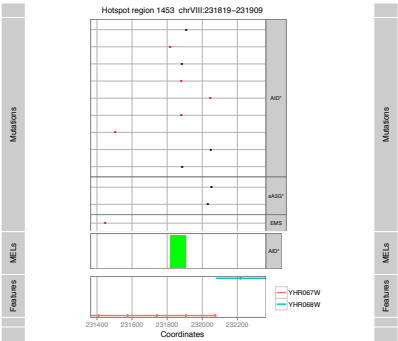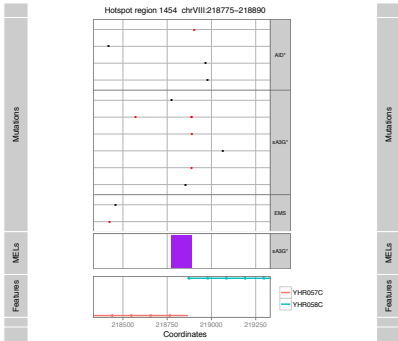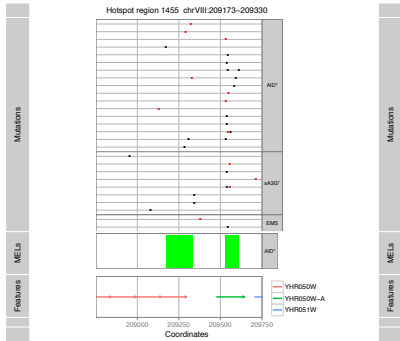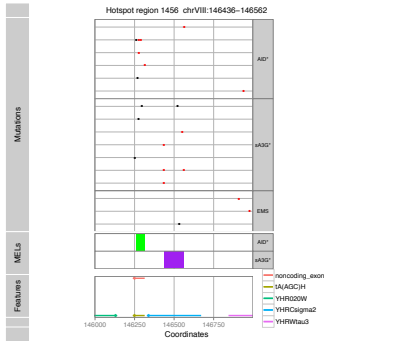

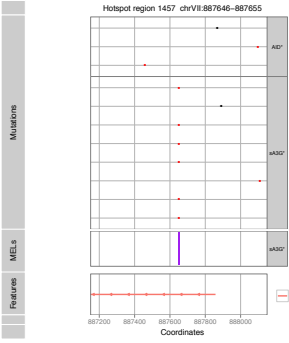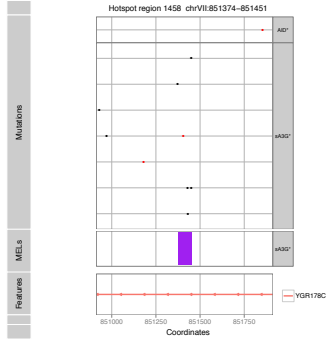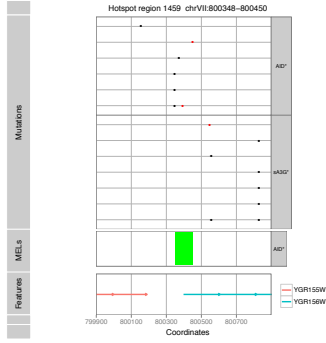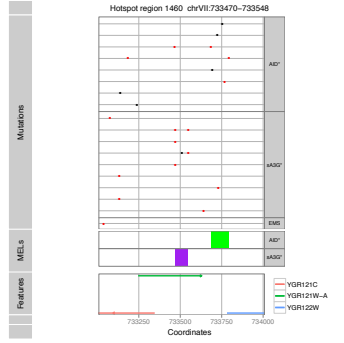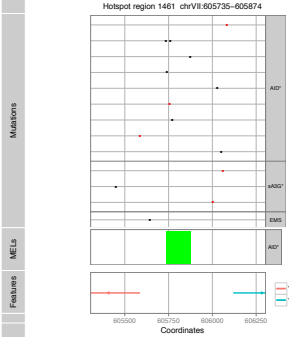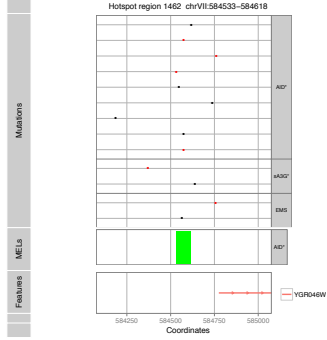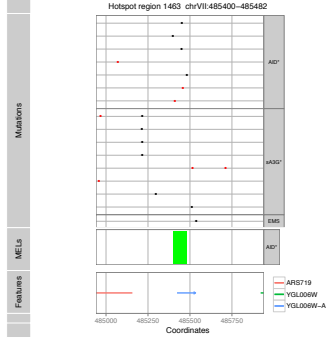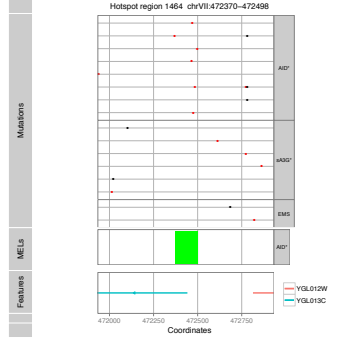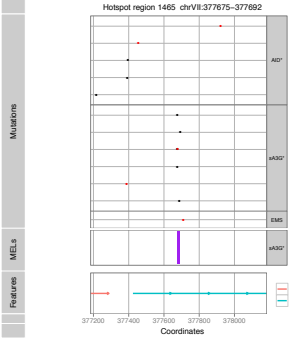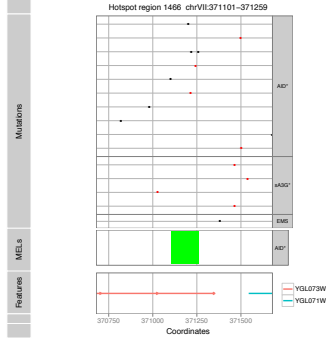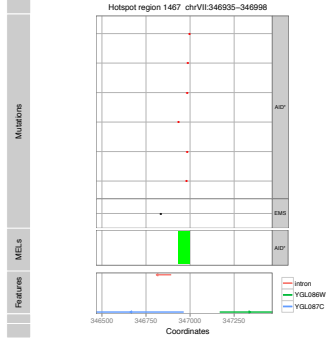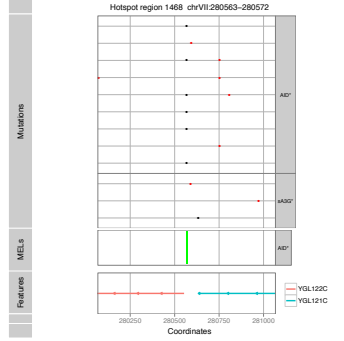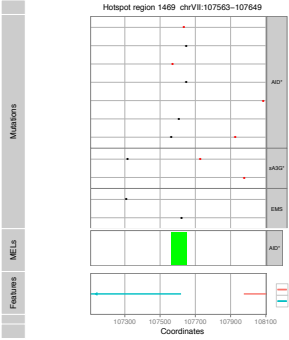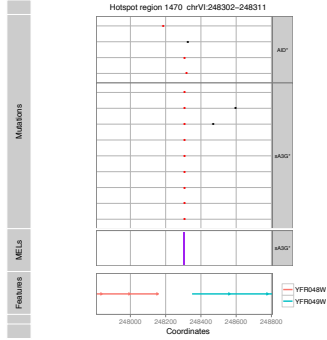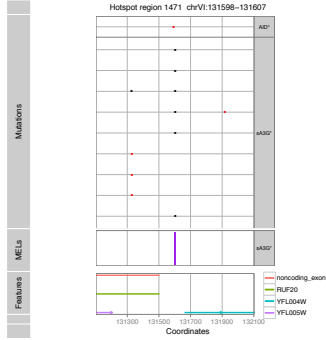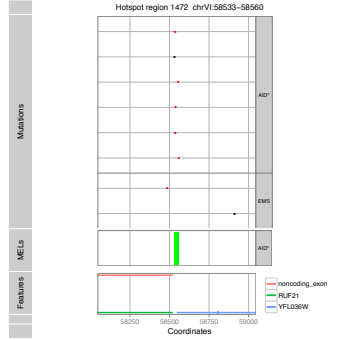

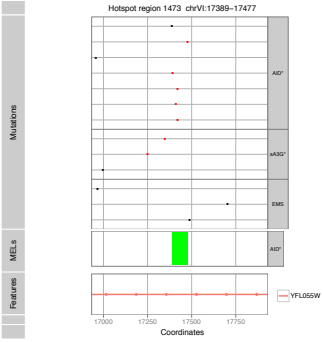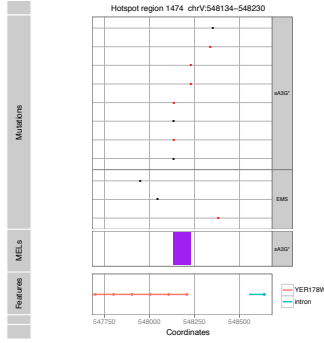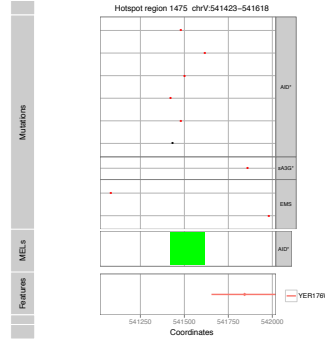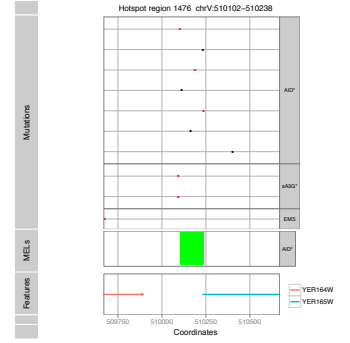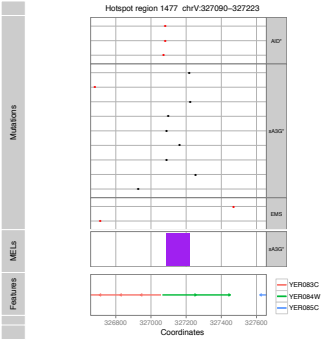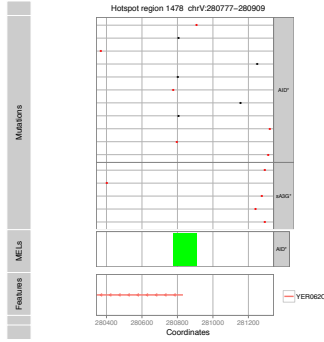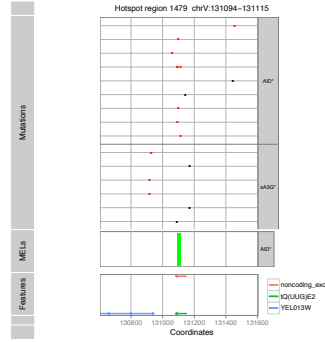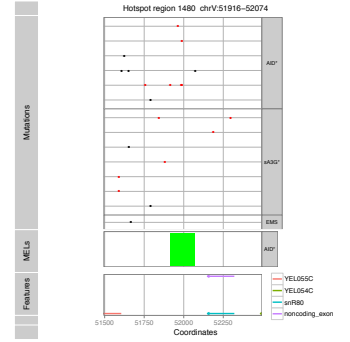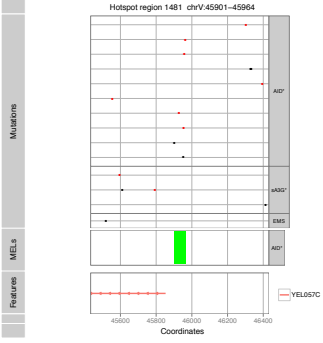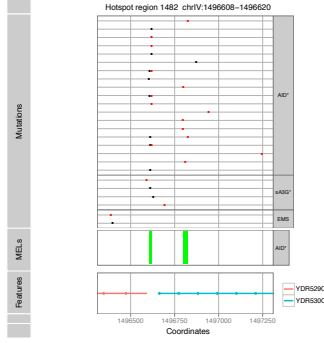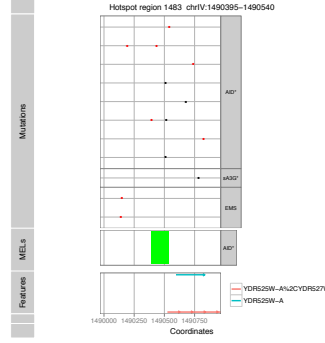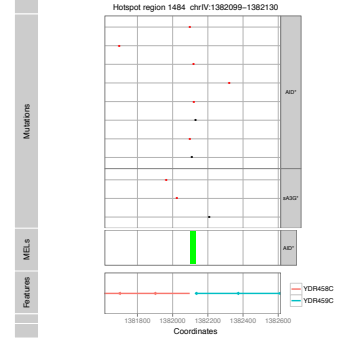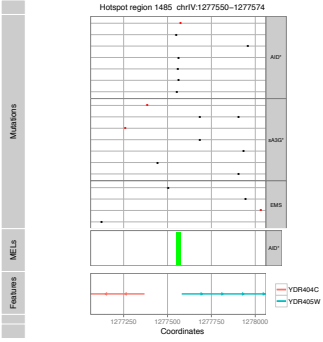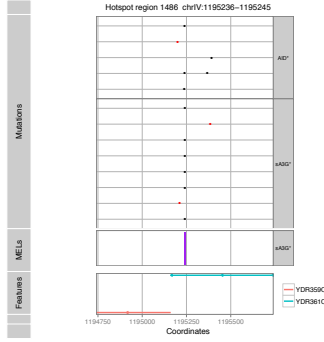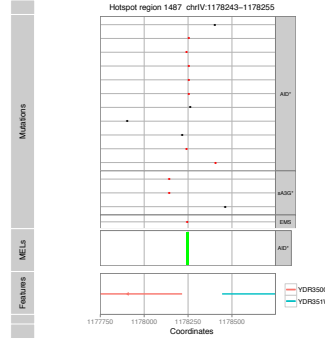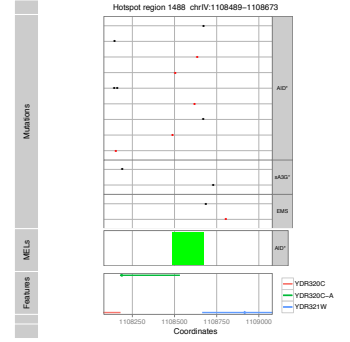

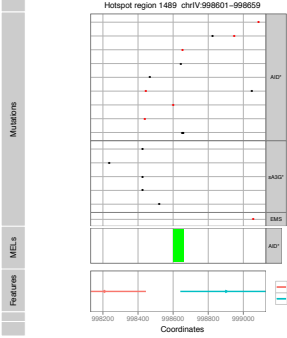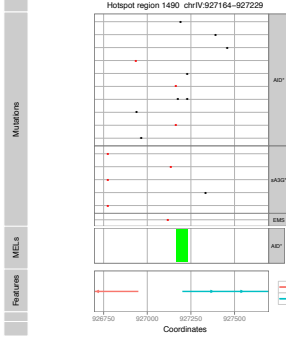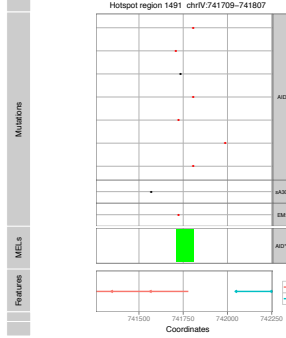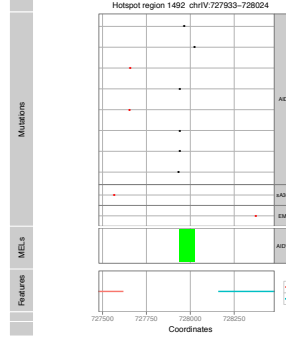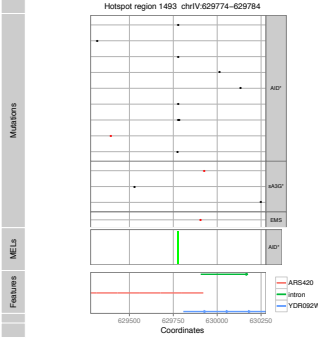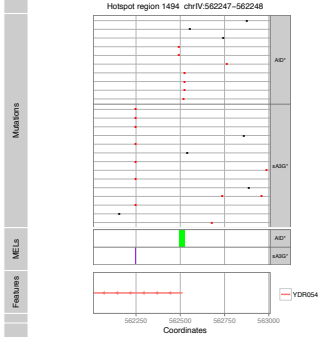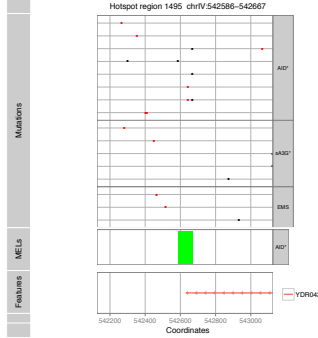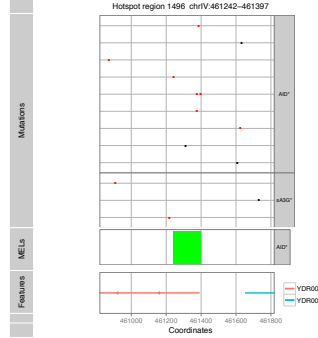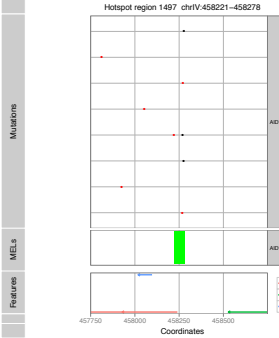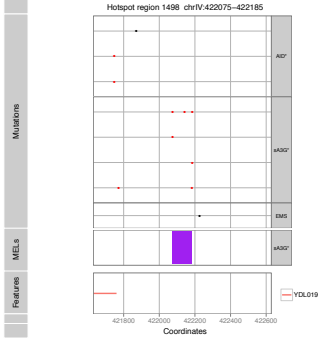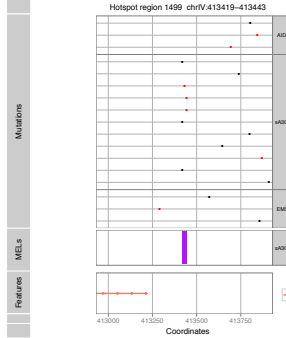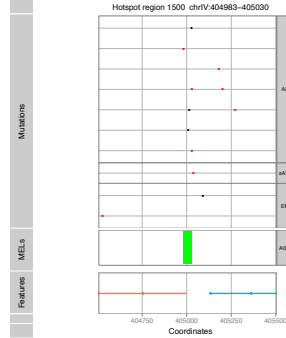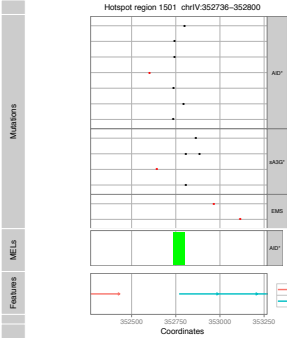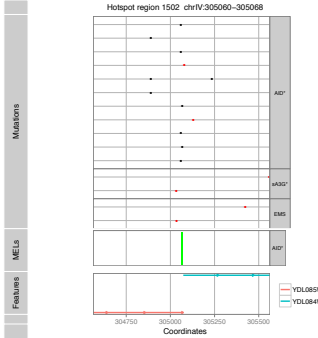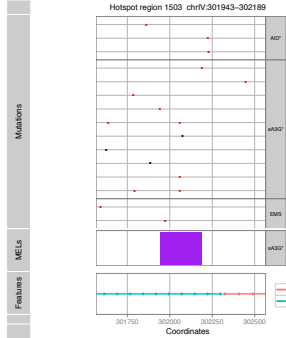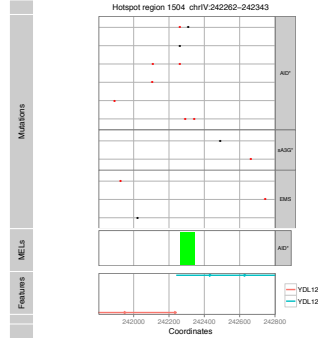

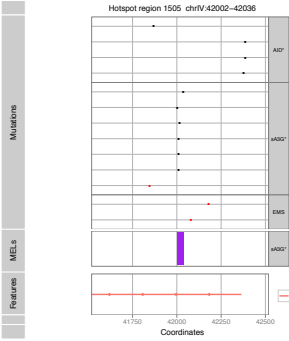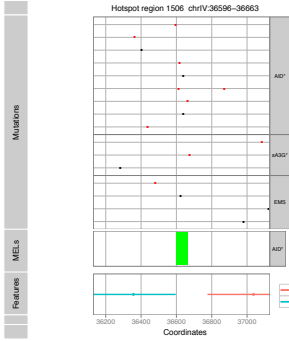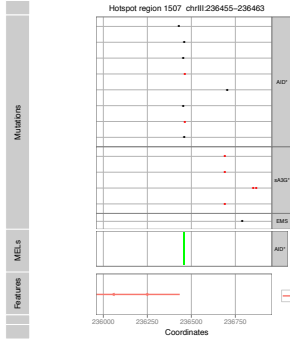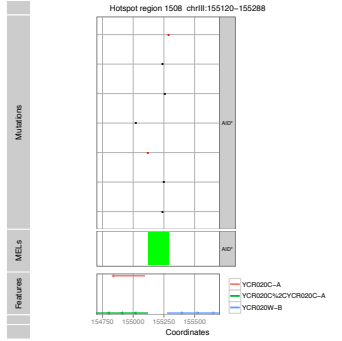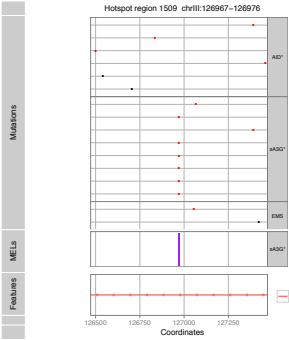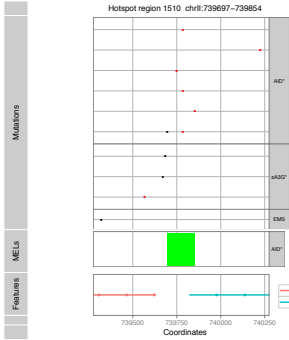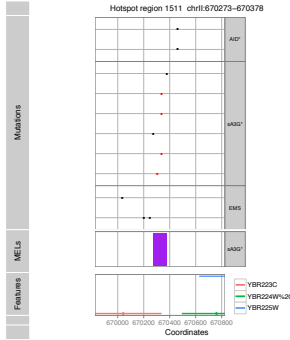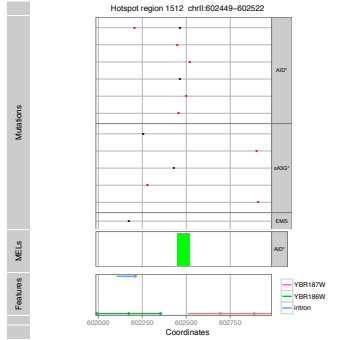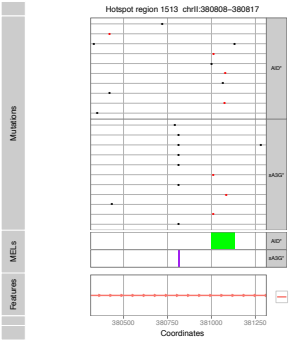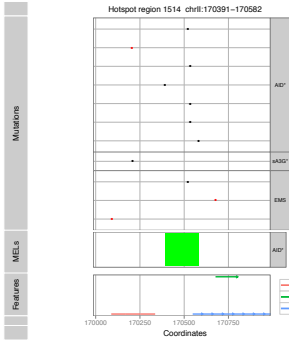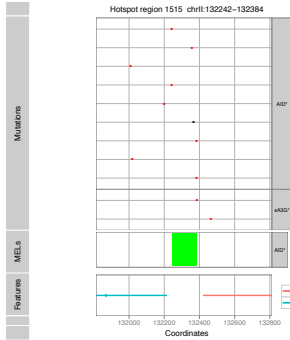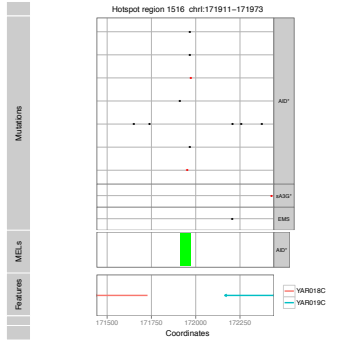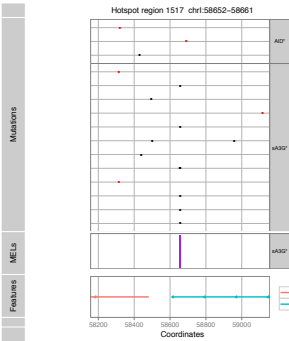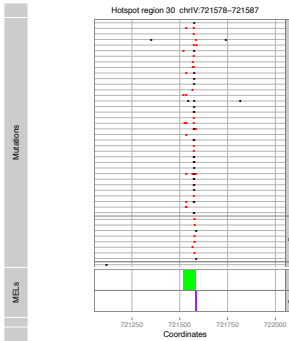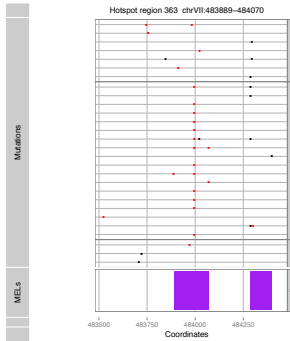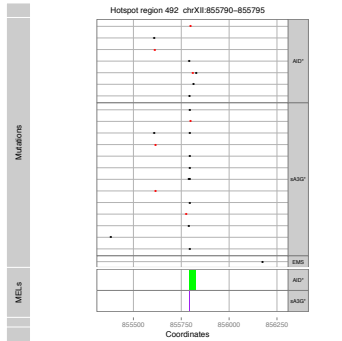

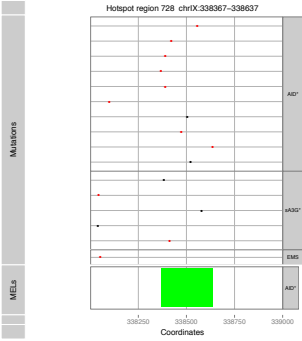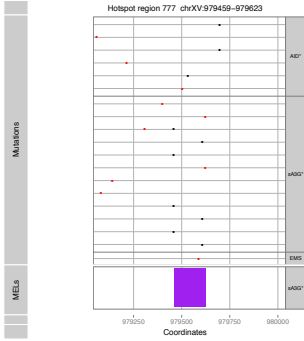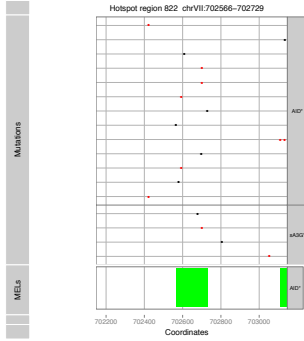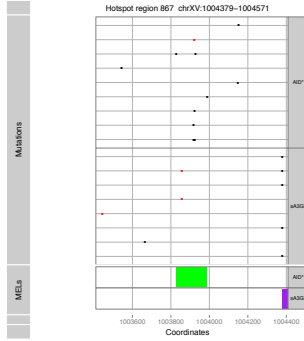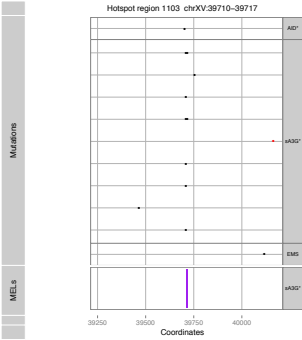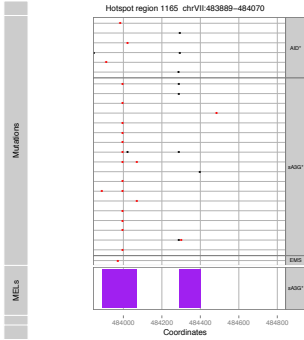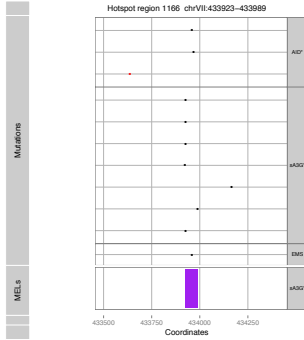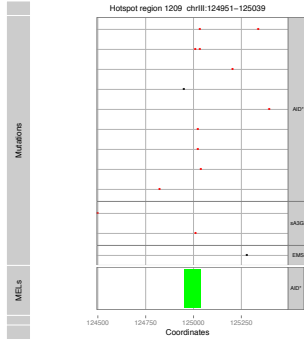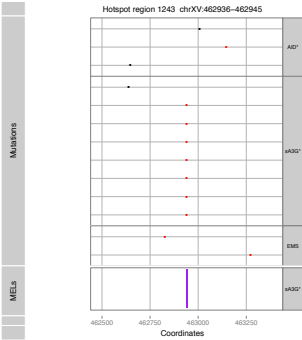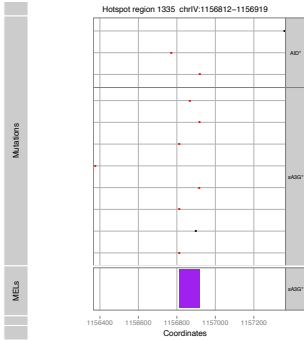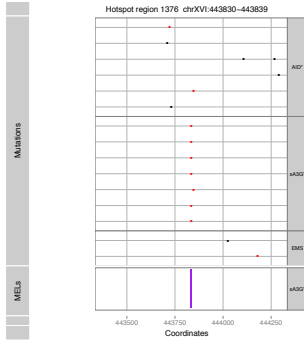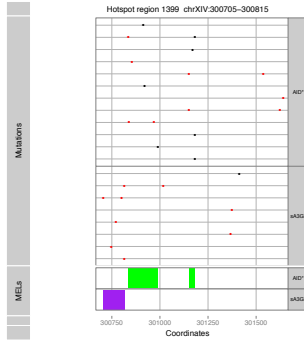

Supplement: supp [file elife-03553-supp-v1.zip › elife_poa_e03553_Supplementary_File_3.pdf]
